# Supplementary material
Source: HighWire-hosted journal article supplement (https://www.sciencemag.org/content/suppl/2015/01/14/347.6219.262)
Supplement: 1261375.Leslie.SM.pdf [file 1261375.Leslie.SM.pdf]

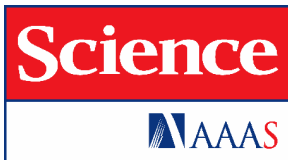

Supplementary Materials for  
**Expectations of brilliance underlie gender distributions across academic disciplines**

Sarah-Jane Leslie,\* Andrei Cimpian,\* Meredith Meyer, Edward Freeland

\*Corresponding author. E-mail: [sjleslie@princeton.edu](mailto:sjleslie@princeton.edu) (S.-J.L.) or [acimpian@illinois.edu](mailto:acimpian@illinois.edu) (A.C.)

Published 16 January 2015, *Science* **347**, 262 (2014)  
DOI: 10.1126/science.1261375

**This PDF file includes**

Materials and Methods  
Figs. S1 and S2  
Tables S1 to S8  
References

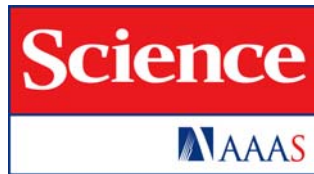

## Supplementary Materials for

### Expectations of Brilliance Underlie Gender Distributions Across Academic Disciplines

Sarah-Jane Leslie, Andrei Cimpian, Meredith Meyer, Edward Freeland

correspondence to: [sjleslie@princeton.edu](mailto:sjleslie@princeton.edu) or [acimpian@illinois.edu](mailto:acimpian@illinois.edu)

**This PDF file includes:**

Materials and Methods

Figures S1-S2

Tables S1-S8

## Materials and Method

**Participants:** Participants were recruited by email invitation. Participants' email addresses were obtained by searching online departmental directories of universities in the United States. We obtained email addresses for professors, graduate students, and post-doctoral fellows/researchers in 30 target disciplines including 9 social sciences, 9 humanities, and 12 STEM disciplines (Table S1). The target disciplines were selected so as to include a wide range of fields across the entire academic spectrum, and to provide a representative sample of the cross-field variability in female representation. Participants received an initial email, then a reminder email approximately one week later (Table S5). In an initial round of data collection, members of departments in 9 geographically-diverse universities (5 private, 4 public) received invitations. Every professor, graduate student, and post-doctoral fellow in the selected departments was sent a survey invitation (as long as their email address was listed in their department's online directory). To safeguard the anonymity of our respondents, we cannot disclose the identity of the universities surveyed. As some fields are small and close-knit, identifying the particular departments that were included in our survey would be ethically problematic, given the sensitive nature of some of our questions.

After the initial round of data collection,<sup>1</sup> we emailed additional university members of 4 of the 30 disciplines due to a low number of respondents (<20) within those disciplines. The number of additional universities for each of the 4 disciplines was determined based on initial  $n$  and size of departments (Statistics = 2, Communications = 2, Middle Eastern Studies = 4, Music Theory and Composition = 24).

In total, 28,210 people were contacted, and 1,820 individuals provided useable data (6.5%). We excluded additional data from surveys that were mostly incomplete ( $n = 709$ ), from individuals who indicated they did not fill out the survey correctly or with due care ( $n = 5$ ), from individuals who reported that their primary field was not one of the target disciplines ( $n = 135$ ), and from individuals who reported that they were not faculty, graduate students, or post-doctoral fellows/researchers ( $n = 7$ ).

**Survey administration and content:** Participants completed the survey anonymously online. The survey began by asking participants to identify one of our 30 target disciplines as their primary field of work, or else to specify another field. If participants specified another field, they were thanked for their time, and the study terminated. If they selected one of our 30 target fields, then they were asked a number of questions about that field (see below and Table S2), along with some questions concerning their particular department (e.g., how it compares to other US departments in the field), their university (e.g., whether it is public or private), and themselves (academic rank, gender, age, ethnicity, and race).

The responses from participants within a discipline were averaged, such that each discipline had a single score for each question (see Table S3 for a correlation matrix, Table S4 for means by discipline, and Table S8 for individual responses). This allowed subsequent analyses to be performed over the 30 disciplines, rather than over the individual participants.

---

<sup>1</sup> The same pattern of results reported in the main paper was found with this initial set of data.

**Field-specific Ability Beliefs questions.** The four questions designed to investigate the Field-specific Ability Beliefs hypothesis (Table S2) were asked both from the participants' own perspective ("Personally, I think that ...") and from the perspective of other academics in their field ("Other academics in my field think that ..."). Because the responses to these eight items (four *self* and four *other*) were highly consistent with one another ( $\alpha = .90$ ), the *self* and *other* scores for each discipline were averaged and treated as a single measure in all analyses reported in the main text (but see below for analyses performed separately for the *self* and *other* scores). The Field-specific Ability Belief questions appeared first in the survey; the *self* and *other* blocks were counterbalanced in order of presentation, and items within these two blocks were ordered randomly.

**Workload questions.** We asked participants to indicate the number of hours they worked each week (Table S2). The average number of hours worked on- and off-campus in each discipline was calculated by averaging the number of hours reported by all full-time respondents (i.e., scores from participants who reported being retired or emeritus were not included). These average scores were added to obtain a measure of total hours worked for each discipline. These questions were presented in the last portion of the survey, along with the demographic questions.

**Selectivity question.** We asked faculty participants to estimate the percentage of applicants admitted to their PhD program in a typical year (Table S2). We created two measures of selectivity using this question: one measure included all responses (used in the analyses reported in the main text), and another included only responses from individuals who rated their department as being in the top 10% of US departments in the relevant field (analyses reported below). This question was presented in the last portion of the survey, along with the demographic questions.

As an additional measure of selectivity, we obtained information on the average GRE scores for 2011-2012 PhD applicants, which were available for only 19 of our disciplines (20). To create a composite score, we calculated standardized scores for each of the fields on the verbal, quantitative, and analytical writing portions. These three standardized scores were then averaged to produce a composite measure of GRE scores for the applicant pools of each of these disciplines.

**Systemizing vs. Empathizing questions.** Two items assessed the extent to which scholarly work in a field relies on "systemizing" ( $\alpha = .63$ ) and two other items did the same for "empathizing" ( $\alpha = .90$ ; Table S2).<sup>2</sup> Each pair was averaged to produce a single measure of systemizing and a single measure of empathizing. For each discipline, the empathizing score was then subtracted from the systemizing score to create the discipline's systemizing vs. empathizing score. Note, however, that the pattern of results reported in the main paper is replicated if either systemizing scores or empathizing scores are considered alone (i.e., not using the difference score). These four items were presented as a group, in randomized order. In the survey flow, they appeared after the Field-specific Ability Beliefs questions, but either before or after the Potential Mechanism questions (see below).

**Potential Mechanisms questions.** Three questions were designed to explore some of the mechanisms by which Field-specific Ability Beliefs could influence women's participation (Table S2). One of these questions, which pertained to potential gender disparities in ability, was asked both from respondents' own perspective and from the perspective of others in their field. The *self* and *other* versions of this question were averaged for each discipline and treated as a single measure for the

---

<sup>2</sup> Due to a programming error, six respondents from Spanish departments did not receive these questions.

purpose of our analyses ( $\alpha = .80$ ). The order of the Mechanism questions was randomized, with the constraint that the *self* version of the question about gender disparities in ability was always presented before the *other* version. In the survey flow, these questions appeared after the Field-specific Ability Beliefs questions, but either before or after the systemizing vs. empathizing questions. Note that responses to the question concerning whether women face more challenges than men did not correlate with female representation,  $r(28) = -.05$ ,  $P = .788$ , or with Field-specific Ability Beliefs,  $r(28) = -.003$ ,  $P = .986$ . Thus, this question was not discussed in the main text.

**Estimated female representation question.** Participants were asked to estimate their field's female representation (Table S2). This question was presented either immediately before or immediately after the Potential Mechanisms questions.

**Creating post-stratification weights to adjust for differential non-response:** We used information about the initial survey sample ( $N = 28,210$ ) and the institutions that were chosen for the sample to construct a set of post-stratification weights that were incorporated into the data analysis in order to reduce the potential for non-response bias in our results. That is, we determined the extent of differential response among the important subgroups in our sample (e.g., males vs. females), and then assigned weights to these subgroups to adjust for potential patterns of differential response. We then re-ran our analyses on these weighted data to ensure that the same pattern of results was obtained when adjusting for differential response.

More specifically, we divided our sample along three key dimensions: participants' field, their gender, and their departmental position (i.e., graduate student, post-doc, or faculty member). Given that graduate students made up the majority of the target population of our survey (as well as a majority of respondents), we estimated response rates separately for the male and female graduate students, but jointly for everyone else. Thus, we estimated response rates for 90 different subgroups (or cells): male graduate students, female graduate students, and post-docs/faculty within each of the 30 fields.

To estimate the response rates for each of these cells, we proceeded as follows. For the population of respondents ( $N = 1,820$ ), we knew the gender of each respondent as well as their field and departmental position (i.e., graduate student, post-doc, or faculty member). For the original survey population ( $N = 28,210$ ), we knew the number of persons invited to take the survey in each academic field. We could also calculate estimates of (1) the ratio of graduate students to all other positions in the field, and (2) the ratio of male and female graduate students in each field. For the former estimate, we used information available on the webpages of all departments in the sample. (Although unavoidable in our case, use of departmental webpages is subject to some error. For example, departmental boundaries are not consistent across institutions [e.g., some institutions have joint Math/Computer Science departments], so reasonable estimates had to be made to tally merged departments as if they were separate. Precautions were taken to avoid double counting faculty members with more than one departmental affiliation.) To estimate the male-to-female graduate student ratio within each field, we used data from the Survey of Earned Doctorates (7). Using this additional information, we were able to estimate the response rates for the three key cells (male graduate students, female graduate students, and post-docs/faculty) within each of the 30 academic fields represented in our sample.

Next, the post-stratification weights were calculated as the inverse of the response rate for each cell (Table S6). The values of the post-stratification weights ranged from 2.17 to 105.23 (with a median value of 15). These weights were then used to re-calculate the mean values of the key variables for each of the 30 academic fields. The weighted analyses reported in the main text (and Table S7 below) reflect the application of these weight adjustments for differential (non-)response. Importantly, these weighted analyses perfectly replicated the results of the unweighted analyses, which is an indication that non-response bias is unlikely.

Finally, in addition to adjusting the mean values for key variables at the field level, we also analyzed both the weighted and unweighted aggregate data to see if any of the key variables were correlated with the absolute number of responses or the field-level response rate. We found no such correlations. Furthermore, we examined whether the *variances* of the key dependent and independent variables were associated with the field-level response rate or the absolute number of responses and again found no significant correlations beyond what would be expected purely by chance. The results of these meta-analyses of the dataset, coupled with the near-insignificant impact from the added post-stratification weights, indicate that the major findings of the present research are unlikely to have been affected by non-response bias.

#### **Additional Results:**

**Using the separate *self* and *other* measures of Field-specific Ability Beliefs:** In regression models analogous to Model 5 in Table 1, both the *self* and the *other* Field-specific Ability Belief scores emerged as the only significant predictors,  $\beta_s = -.53$  and  $-.52$ ,  $P_s = .001$  and  $.013$ , respectively. Thus, both practitioners' own beliefs about what is required for success and their impressions of their colleagues' beliefs are equally predictive of gender gaps across academia.

**Using the total amount of hours worked:** In a regression model analogous to Model 5 in Table 1 except using the total number of hours worked rather than the number of hours worked on-campus, the Field-specific Ability Belief scores again emerged as the only significant predictor,  $\beta = -.54$ ,  $P = .001$ . The total number of hours worked did not significantly predict women's representation,  $\beta = .13$ ,  $P = .424$ .

**Using a different measure of selectivity:** We asked respondents to provide an estimate of their department's ranking relative to other departments in their field. We then created a second measure of selectivity by considering only data from faculty who ranked their departments as being in the top 10% of their field. This second measure helps equate department quality across disciplines: Because the departments we sampled may vary in quality, and quality/ranking affects selectivity, this second measure provides another means of examining the relationship between selectivity and female representation across the 30 fields. (67.1% of faculty rated their department as being in the top 10%; as we sampled from prestigious research universities, most respondents reported themselves to be in this category.) This alternative selectivity measure was not significantly correlated with female representation,  $r(28) = .30$ ,  $P = .111$ , nor did it predict female representation when it was entered (instead of the unrestricted selectivity variable) in a regression analysis analogous to that in Model 5 (Table 1),  $\beta = .15$ ,  $P = .432$ .

**Using post-stratification weights:** Weighted versions of all models in Table 1 are reported in Table S7. The weighted results replicated those reported in the main text.

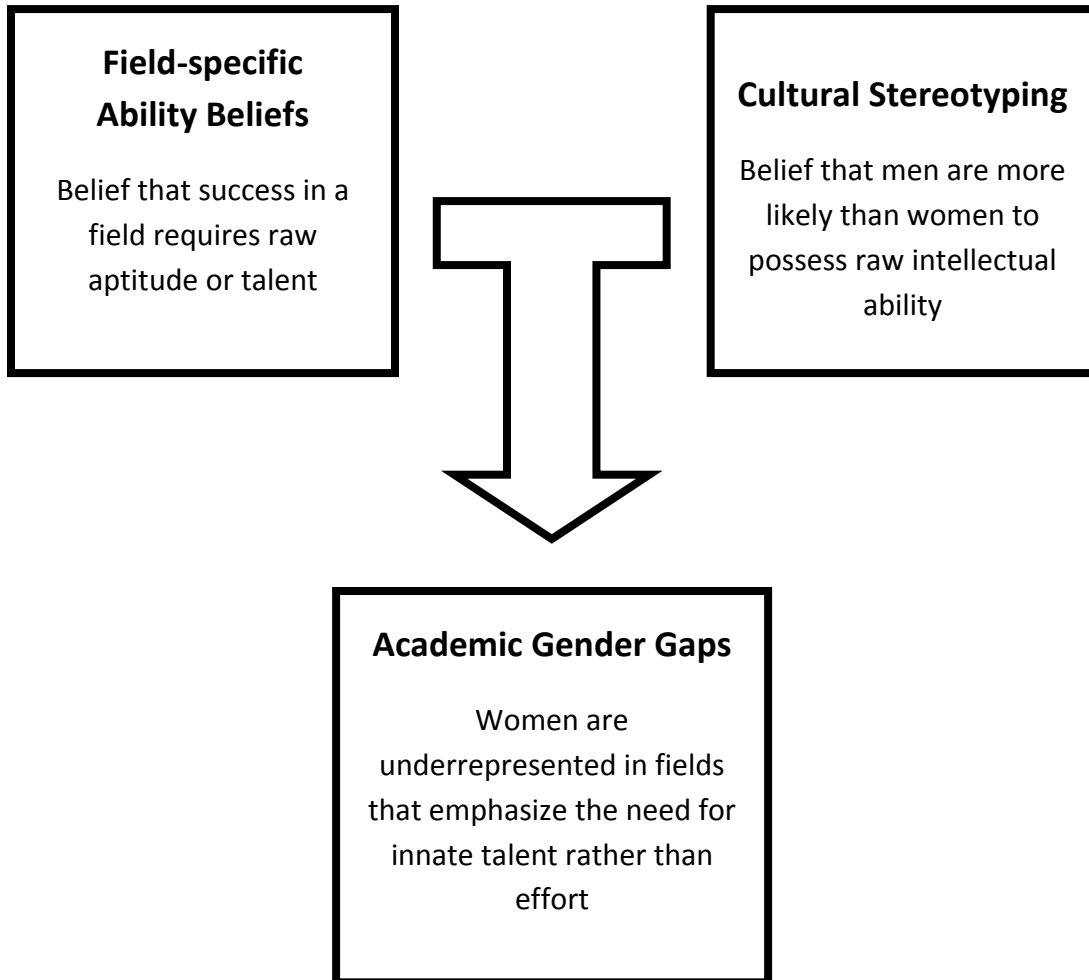

**Fig. S1.** Diagram of the Field-specific Ability Beliefs hypothesis.



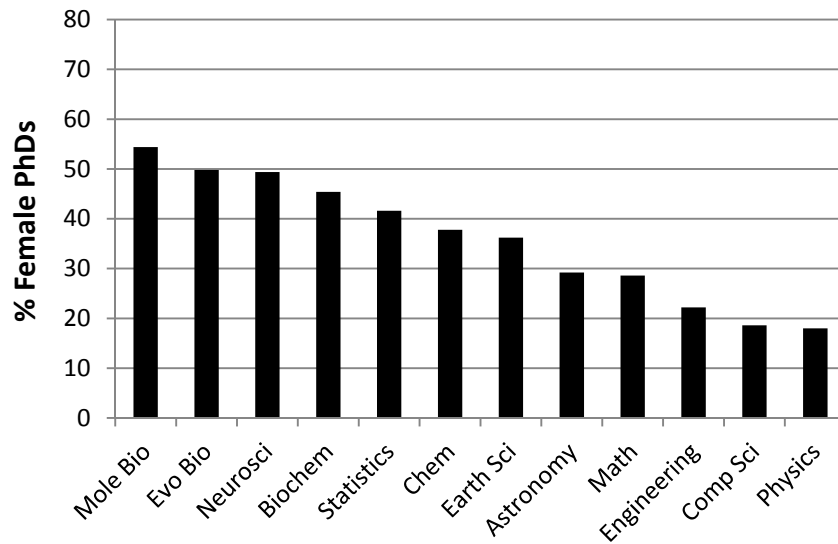

**(A) STEM**

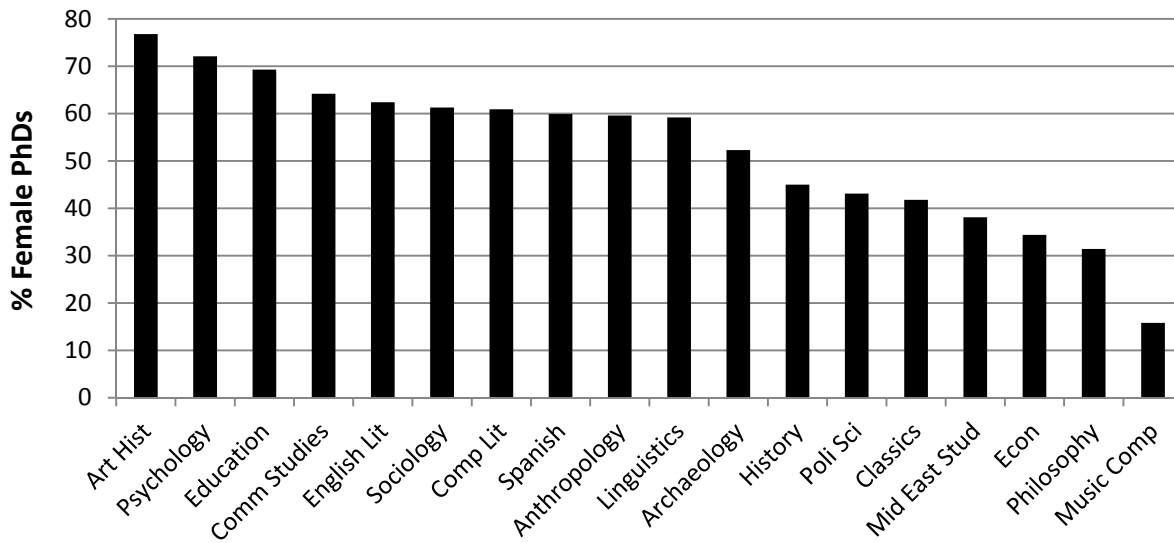

**(B) Social Sciences and Humanities**

**Fig. S2.** Percentage of US PhDs awarded to women in 2011 (NSF Survey of Earned Doctorates) in STEM (A) and Social Science and Humanities (B) disciplines.

**Table S1: Disciplines targeted, and number of respondents in each**

| <b>Discipline</b>      | <b>N</b> | <b>Discipline</b>                   | <b>N</b> | <b>Discipline</b>    | <b>N</b> |
|------------------------|----------|-------------------------------------|----------|----------------------|----------|
| Anthropology           | 69       | Earth Science                       | 54       | Molecular Biology    | 60       |
| Archaeology            | 30       | Economics                           | 85       | Music Theory & Comp. | 28       |
| Art History            | 29       | Education                           | 58       | Neuroscience         | 42       |
| Astronomy              | 35       | Engineering                         | 103      | Philosophy           | 58       |
| Biochemistry           | 29       | English Literature                  | 66       | Physics              | 104      |
| Chemistry              | 83       | Evolutionary Biology                | 27       | Political Science    | 112      |
| Classics               | 24       | History                             | 101      | Psychology           | 143      |
| Communication Studies  | 43       | Linguistics                         | 39       | Sociology            | 117      |
| Comparative Literature | 43       | Mathematics                         | 133      | Spanish              | 22       |
| Computer Science       | 47       | Middle Eastern Studies <sup>a</sup> | 8        | Statistics           | 28       |

<sup>a</sup>Due to the fact that Middle Eastern Studies departments are not very common, as well as relatively small in size, we failed to recruit at least 20 participants for this field. However, the pattern of results reported in the main paper is the same if we exclude Middle Eastern Studies from consideration, and thus only consider disciplines with at least 20 participants.

**Table S2: The survey items**

---

**Field-specific Ability Beliefs<sup>a</sup>**

Being a top scholar of [discipline] requires a special aptitude that just can't be taught.

If you want to succeed in [discipline], hard work alone just won't cut it; you need to have an innate gift or talent.

With the right amount of effort and dedication, anyone can become a top scholar in [discipline]. (R)

When it comes to [discipline], the most important factors for success are motivation and sustained effort; raw ability is secondary. (R)

**Workload<sup>b</sup>**

Approximately how many hours a week do you spend working:

In your office, lab, classroom, or otherwise on campus?

Off campus (e.g., home, coffee shop, other remote site)?

**Selectivity<sup>c</sup>**

Roughly what percentage of applicants are accepted into your department's Ph.D. program in a typical year? (R)

**Systemizing vs. Empathizing<sup>d</sup>**

Please rate the extent to which the following processes are involved in doing scholarly work in [discipline]:

Identifying the abstract principles, structures, or rules that underlie the relevant subject matter (Systemizing)

Analyzing the relevant subject matter and constructing a systematic understanding of it (Systemizing)

Having a refined understanding of human thoughts and feelings (Empathizing)

Recognizing and responding appropriately to people's mental states (Empathizing)

**Potential Mechanisms<sup>a</sup>**

Even though it's not politically correct to say it, men are often more suited than women to do high-level work in [discipline].

[discipline] as a discipline is welcoming to women.

Women face more challenges than men if they pursue careers in [discipline].

**Estimated Female Representation<sup>c</sup>**

In the recent past, what percentage of [discipline] doctoral (Ph.D.) degrees from American universities have been earned by women?

---

*Note.* (R) indicates items that were reverse scored.

<sup>a</sup> Responses to these items were given on a 7-point scale (1 = strongly disagree to 7 = strongly agree).

<sup>b</sup> Responses to these items were given on an 8-point scale (1 to 8, 1-7 corresponding to 10-hour increments, and 8 corresponding to >70 hours).

<sup>c</sup> Responses to these items were given on a 10-point scale (1 to 10, each number corresponding to a 10% increment). For the Selectivity question, there were two additional options for "don't know" and "no Ph.D. program".

<sup>d</sup> Response to these items were given on a 7-point scale (1 = never involved to 7 = highly involved).

**Table S3: Correlations among the main variables in the study of academics**

| Variable   | 1 | 2   | 3           | 4           | 5           | 6           | 7           | 8          | 9          | 10          | 11          | 12         | 13          | 14          | 15          | 16          | 17          |
|------------|---|-----|-------------|-------------|-------------|-------------|-------------|------------|------------|-------------|-------------|------------|-------------|-------------|-------------|-------------|-------------|
| 1. FEM     | — | .36 | <b>-.40</b> | <b>-.50</b> | <b>-.60</b> | <b>-.40</b> | <b>-.50</b> | -.32       | -.03       | .34         | .30         | -.18       | <b>.57</b>  | <b>-.53</b> | <b>-.67</b> | <b>.74</b>  | -.05        |
| 2. AFR     |   | —   | .16         | -.08        | <b>-.54</b> | <b>-.40</b> | <b>-.46</b> | <.01       | -.05       | -.10        | -.20        | -.02       | .16         | -.14        | -.18        | .23         | .04         |
| 3. ASI     |   |     | —           | <b>.53</b>  | .16         | -.04        | .26         | .34        | .06        | -.12        | -.20        | .04        | <b>-.50</b> | <b>.44</b>  | <b>.42</b>  | -.22        | -.12        |
| 4. STEM    |   |     |             | —           | .14         | -.04        | .19         | <b>.79</b> | <b>.37</b> | <b>-.46</b> | <b>-.52</b> | .29        | <b>-.84</b> | <b>.79</b>  | <b>.48</b>  | -.16        | .07         |
| 5. FAB     |   |     |             |             | —           | <b>.77</b>  | <b>.91</b>  | -.09       | -.21       | .07         | .05         | .31        | -.31        | .34         | <b>.39</b>  | <b>-.58</b> | <.01        |
| 6. FAB-W   |   |     |             |             |             | —           | <b>.49</b>  | -.12       | -.24       | .16         | .07         | <b>.46</b> | -.17        | .25         | -.03        | -.33        | .10         |
| 7. FAB-M   |   |     |             |             |             |             | —           | -.08       | -.21       | .07         | .10         | .15        | -.34        | .33         | <b>.45</b>  | <b>-.57</b> | -.04        |
| 8. HW-OC   |   |     |             |             |             |             |             | —          | <b>.65</b> | <b>-.51</b> | <b>-.64</b> | .32        | <b>-.73</b> | <b>.70</b>  | .34         | -.04        | .10         |
| 9. HW-T    |   |     |             |             |             |             |             |            | —          | <b>-.50</b> | <b>-.59</b> | -.03       | -.21        | .17         | .12         | .16         | -.07        |
| 10. SEL-A  |   |     |             |             |             |             |             |            |            | —           | <b>.93</b>  | -.09       | .33         | -.30        | -.33        | .08         | .18         |
| 11. SEL-P  |   |     |             |             |             |             |             |            |            |             | —           | -.18       | <b>.41</b>  | <b>-.39</b> | -.30        | .03         | .14         |
| 12. SYS    |   |     |             |             |             |             |             |            |            |             |             | —          | <b>-.51</b> | <b>.67</b>  | -.04        | -.02        | .14         |
| 13. EMP    |   |     |             |             |             |             |             |            |            |             |             |            | —           | <b>-.98</b> | <b>-.42</b> | .27         | -.09        |
| 14. S vs E |   |     |             |             |             |             |             |            |            |             |             |            |             | —           | .36         | -.23        | .11         |
| 15. SUIT   |   |     |             |             |             |             |             |            |            |             |             |            |             |             | —           | <b>-.74</b> | .16         |
| 16. WEL    |   |     |             |             |             |             |             |            |            |             |             |            |             |             |             | —           | <b>-.44</b> |
| 17. CHAL   |   |     |             |             |             |             |             |            |            |             |             |            |             |             |             |             | —           |

Notes.  $N = 30$  disciplines. Bolded statistics are significant ( $P < .05$ ). FEM = Percentage of PhD recipients in 2011 (NSF Survey of Earned Doctorates) who were women. AFR = Percentage of PhD recipients in 2011 (NSF Survey of Earned Doctorates) who were African American. ASI = Percentage of PhD recipients in 2011 (NSF Survey of Earned Doctorates) who were Asian American. STEM = STEM indicator variable. FAB = Field-specific Ability Beliefs. FAB-W = Field-specific Ability Beliefs from women participants. FAB-M = Field-specific Ability Beliefs from men participants. HW-OC = On-campus hours worked. HW-T = Total hours worked. SEL-A = Selectivity ratings from all participants. SEL-P = Selectivity ratings from participants in departments in the top 10%. SYS = whether the field requires systemizing. EMP = whether field requires empathizing. S vs E = Systemizing minus empathizing. SUIT = judgments of whether women are less well suited than men. WEL = whether the field is welcoming to women. CHAL = whether women face more challenges than men in the field.

**Table S4: Values of the variables for each discipline**

| Discipline    | FEM  | AFR  | ASI  | FAB  | FAB-W | FAB-M | HW-OC | HW-T | SEL-A | SEL-P | GRE               | SYS  | EMP  | S vs E | SUIT | WEL  | CHAL |
|---------------|------|------|------|------|-------|-------|-------|------|-------|-------|-------------------|------|------|--------|------|------|------|
| ANTHROPOLOGY  | 59.6 | 4.2  | 6.3  | 3.72 | 3.90  | 3.39  | 3.05  | 6.95 | 9.25  | 9.14  |                   | 6.13 | 5.43 | 0.70   | 1.90 | 5.70 | 4.70 |
| ARCHAEOLOGY   | 52.3 | 1.3  | 3.9  | 3.76 | 3.81  | 3.72  | 4.03  | 6.77 | 9.33  | 9.40  |                   | 6.17 | 3.38 | 2.78   | 2.39 | 4.70 | 5.43 |
| ART HISTORY   | 76.8 | 1.5  | 8.8  | 4.06 | 4.00  | 4.16  | 2.85  | 6.85 | 8.78  | 9.00  | .31               | 6.10 | 3.97 | 2.14   | 1.74 | 5.76 | 4.69 |
| ASTRONOMY     | 29.2 | 1.5  | 6.1  | 4.13 | 4.36  | 3.99  | 4.49  | 6.40 | 8.5   | 8.33  |                   | 6.31 | 2.29 | 4.03   | 2.01 | 4.80 | 4.94 |
| BIOCHEMISTRY  | 45.4 | 5.0  | 10.6 | 4.25 | 3.79  | 4.35  | 5.30  | 7.67 | 7.88  | 7.75  |                   | 6.28 | 2.93 | 3.34   | 2.38 | 5.41 | 4.07 |
| CHEMISTRY     | 37.8 | 4.3  | 9.6  | 4.11 | 4.10  | 4.12  | 5.73  | 7.51 | 7.00  | 6.86  | .04 <sup>b</sup>  | 6.35 | 2.53 | 3.82   | 2.77 | 4.45 | 4.88 |
| CLASSICS      | 41.8 | 0    | 2.9  | 4.34 | 4.58  | 4.22  | 3.83  | 6.75 | 9.29  | 9.20  |                   | 5.83 | 4.21 | 1.63   | 1.90 | 5.29 | 4.50 |
| COMMUNIC      | 64.2 | 7.4  | 4.6  | 3.79 | 3.68  | 3.94  | 3.38  | 6.80 | 9.16  | 9.21  | -.87              | 5.88 | 4.63 | 1.26   | 1.95 | 4.21 | 5.42 |
| COMP LIT      | 60.9 | 1.5  | 5.9  | 4.28 | 4.16  | 4.45  | 3.03  | 6.83 | 8.78  | 9.00  | -.04 <sup>c</sup> | 5.86 | 4.43 | 1.43   | 1.97 | 5.56 | 3.84 |
| COMP SCI      | 18.6 | 3.3  | 19.9 | 4.29 | 4.35  | 4.28  | 3.84  | 6.60 | 9.36  | 9.50  | -1.10             | 5.95 | 2.80 | 3.15   | 2.86 | 4.04 | 4.49 |
| EARTH SCI     | 36.2 | 1.7  | 5.4  | 3.76 | 3.35  | 3.92  | 5.04  | 6.98 | 7.00  | 8.00  | -.03              | 6.17 | 2.34 | 3.82   | 2.44 | 5.15 | 4.44 |
| ECONOMICS     | 34.4 | 4.0  | 14.7 | 4.37 | 4.14  | 4.44  | 4.09  | 6.60 | 8.82  | 8.80  | .44               | 6.12 | 3.29 | 2.83   | 2.48 | 4.31 | 4.04 |
| EDUCATION     | 69.3 | 13.0 | 4.8  | 3.32 | 3.19  | 3.44  | 3.12  | 6.67 | 7.80  | 7.95  | -.80              | 5.92 | 4.91 | 1.01   | 1.95 | 6.07 | 3.84 |
| ENGINEERING   | 22.2 | 4.0  | 16.9 | 4.29 | 3.69  | 4.44  | 4.55  | 6.88 | 7.62  | 7.79  | -.62              | 6.22 | 2.83 | 3.38   | 2.85 | 4.17 | 4.70 |
| ENGLISH LIT   | 62.4 | 1.3  | 5.0  | 4.42 | 4.26  | 4.59  | 2.64  | 6.67 | 9.12  | 9.23  | .51               | 5.93 | 4.77 | 1.16   | 1.74 | 5.36 | 4.65 |
| EVOLUTION BIO | 49.8 | 0    | 3.2  | 4.06 | 3.60  | 4.29  | 4.73  | 7.23 | 9.60  | 9.60  | -.22 <sup>d</sup> | 6.28 | 2.44 | 3.83   | 2.11 | 5.33 | 4.52 |
| HISTORY       | 45.0 | 5.2  | 4.0  | 3.90 | 3.76  | 4.05  | 2.87  | 6.66 | 8.76  | 9.27  | .24               | 5.95 | 4.79 | 1.16   | 1.88 | 4.84 | 5.11 |
| LINGUISTICS   | 59.2 | 3.1  | 10.7 | 4.00 | 3.79  | 4.17  | 3.49  | 6.57 | 9.69  | 9.75  |                   | 6.64 | 3.59 | 3.05   | 1.71 | 5.87 | 4.10 |
| MATH          | 28.6 | 2.9  | 10.3 | 4.67 | 4.40  | 4.74  | 3.72  | 6.45 | 8.28  | 8.43  | .43               | 6.62 | 1.91 | 4.71   | 2.84 | 4.39 | 4.68 |
| MID EAST STUD | 38.1 | 0    | 6.4  | 4.11 | 2.88  | 4.52  | 2.63  | 6.63 | 8.60  | 9.33  |                   | 5.31 | 5.19 | 0.13   | 3.31 | 3.63 | 4.50 |
| MOLEC BIO     | 54.4 | 4.6  | 10.8 | 3.88 | 3.66  | 4.03  | 5.49  | 7.41 | 7.92  | 8.00  |                   | 6.21 | 2.66 | 3.55   | 2.28 | 5.12 | 4.75 |
| MUS TH & COM  | 15.8 | 0    | 6.7  | 4.45 | 4.68  | 4.28  | 3.22  | 7.00 | 7.60  | 8.27  |                   | 6.18 | 4.00 | 2.18   | 2.05 | 4.18 | 3.96 |
| NEUROSCI      | 49.4 | 4.3  | 12.9 | 3.83 | 3.76  | 3.98  | 4.76  | 6.71 | 8.38  | 8.80  |                   | 6.14 | 3.54 | 2.61   | 2.31 | 4.98 | 5.33 |
| PHILOSOPHY    | 31.4 | 2.7  | 3.8  | 5.11 | 5.23  | 5.07  | 2.71  | 5.88 | 9.71  | 9.71  | 1.35              | 6.66 | 3.65 | 3.01   | 2.66 | 3.10 | 5.47 |
| PHYSICS       | 18.0 | 1.6  | 8.8  | 4.41 | 4.23  | 4.44  | 4.74  | 7.32 | 7.46  | 8.00  | .82 <sup>e</sup>  | 6.45 | 2.48 | 3.97   | 2.80 | 3.84 | 5.10 |
| POLITICAL SCI | 43.1 | 5.7  | 7.4  | 3.94 | 3.71  | 4.07  | 3.60  | 6.68 | 8.82  | 8.95  | .44               | 6.11 | 3.54 | 2.56   | 2.16 | 4.23 | 5.07 |
| PSYCHOLOGY    | 72.1 | 6.0  | 5.8  | 3.55 | 3.46  | 3.73  | 3.79  | 6.72 | 9.41  | 9.33  | -.54              | 6.15 | 4.72 | 1.43   | 2.05 | 5.47 | 4.83 |
| SOCIOLOGY     | 61.3 | 7.9  | 6.1  | 3.78 | 3.72  | 3.86  | 3.33  | 6.47 | 8.62  | 9.00  | -.54              | 6.27 | 3.90 | 2.37   | 1.78 | 5.38 | 4.94 |
| SPANISH LIT   | 59.9 | 1.2  | 0    | 4.07 | 4.14  | 4.00  | 3.00  | 6.23 | 8.33  | 9.00  |                   | 6.38 | 4.81 | 1.56   | 1.86 | 5.50 | 3.91 |
| STATISTICS    | 41.6 | 5.4  | 18.4 | 4.12 | 3.65  | 4.49  | 3.71  | 6.14 | 9.00  | 9.20  |                   | 6.02 | 2.32 | 3.70   | 2.18 | 4.96 | 4.21 |

*Notes.* GRE = Composite GRE z-score. Other variable names are the same as in Table S4. <sup>a</sup> The female PhD data for this field were combined with Archaeology for the purpose of computing the correlation with the GRE composite. <sup>b</sup> PhD data combined with Biochemistry. <sup>c</sup> PhD data combined with Spanish/Spanish Lit. <sup>d</sup> PhD data combined with Molecular Bio and Neuroscience. <sup>e</sup> PhD data combined with Astronomy.

**Table S5: Text of email invitation**

---

| <b>Initial Invitation</b>                                                                                                                                                                                                                                                                                                                                                                                                                                                                                                                                                                                                                                                                                                                                                                                                                                                                                                                          |
|----------------------------------------------------------------------------------------------------------------------------------------------------------------------------------------------------------------------------------------------------------------------------------------------------------------------------------------------------------------------------------------------------------------------------------------------------------------------------------------------------------------------------------------------------------------------------------------------------------------------------------------------------------------------------------------------------------------------------------------------------------------------------------------------------------------------------------------------------------------------------------------------------------------------------------------------------|
| <p>Dear colleague,</p> <p>We are conducting a cross-disciplinary study to compare academics' beliefs about their respective fields. Given your expertise within your field of study, we would like to invite you to complete this short survey, which you may access by clicking the following link: [SURVEY LINK]</p> <p>We thank you for your time and look forward to your response!</p> <p>Sincerely,<br/>The Academic Disciplines Survey Research Team</p> <p>Please be assured your responses will be kept confidential, and we will not ask you to provide any personally-identifying information. Because this survey does not collect personally-identifying information, it has been deemed exempt by the University of Michigan Health Sciences and Behavior Sciences Institutional Review Board. If you have any questions about this survey, please reply to this email or email one of the researchers at [RESEARCH TEAM EMAIL].</p> |
| <b>Follow-up Invitation</b>                                                                                                                                                                                                                                                                                                                                                                                                                                                                                                                                                                                                                                                                                                                                                                                                                                                                                                                        |
| <p>Dear colleague,</p> <p>About a week ago, we contacted you about a cross-disciplinary study comparing academics' beliefs about their respective fields.</p> <p>***If you have already completed this survey, thank you!***</p> <p>If you forgot to complete it but would still like to, please follow this link to provide your responses: [SURVEY LINK]</p> <p>We thank you for your time!<br/>Sincerely,<br/>The Academic Survey Research Team</p> <p>Please be assured your responses will be kept confidential, and we will not ask you to provide any personally-identifying information. Because this survey does not collect personally-identifying information, it has been deemed exempt by the University of Michigan Health Sciences and Behavior Sciences Institutional Review Board. If you have any questions about this survey, please reply to this email or email one of the researchers at [RESEARCH TEAM EMAIL].</p>          |

---

**Table S6: Response rates and post-stratification weights**

| Field            | Cell <sup>1</sup> | Respondent Count | Target Sample Estimate (Rounded) | Response Rate | Weight | Field             | Cell <sup>1</sup> | Respondent Count | Target Sample Estimate (Rounded) | Response Rate | Weight |
|------------------|-------------------|------------------|----------------------------------|---------------|--------|-------------------|-------------------|------------------|----------------------------------|---------------|--------|
| Anthropology     | 1                 | 13               | 135                              | 9.6%          | 10.37  | Evolutionary Bio. | 1                 | 10               | 61                               | 16.4%         | 6.11   |
| Anthropology     | 2                 | 33               | 199                              | 16.6%         | 6.03   | Evolutionary Bio. | 2                 | 6                | 61                               | 9.9%          | 10.10  |
| Anthropology     | 3                 | 23               | 387                              | 5.9%          | 16.83  | Evolutionary Bio. | 3                 | 11               | 333                              | 3.3%          | 30.27  |
| Archaeology      | 1                 | 9                | 97                               | 9.3%          | 10.72  | History           | 1                 | 18               | 301                              | 6.0%          | 16.71  |
| Archaeology      | 2                 | 11               | 106                              | 10.4%         | 9.62   | History           | 2                 | 33               | 246                              | 13.4%         | 7.46   |
| Archaeology      | 3                 | 10               | 111                              | 9.0%          | 11.10  | History           | 3                 | 50               | 647                              | 7.7%          | 12.94  |
| Art History      | 1                 | 2                | 29                               | 6.9%          | 14.50  | Linguistics       | 1                 | 9                | 75                               | 12.0%         | 8.30   |
| Art History      | 2                 | 15               | 96                               | 15.6%         | 6.40   | Linguistics       | 2                 | 10               | 108                              | 9.2%          | 10.83  |
| Art History      | 3                 | 12               | 221                              | 5.4%          | 18.42  | Linguistics       | 3                 | 20               | 189                              | 10.6%         | 9.45   |
| Astronomy        | 1                 | 7                | 219                              | 3.2%          | 31.25  | Mathematics       | 1                 | 60               | 258                              | 23.2%         | 4.31   |
| Astronomy        | 2                 | 4                | 90                               | 4.4%          | 22.56  | Mathematics       | 2                 | 16               | 104                              | 15.5%         | 6.47   |
| Astronomy        | 3                 | 24               | 247                              | 9.7%          | 10.29  | Mathematics       | 3                 | 57               | 1065                             | 5.4%          | 18.68  |
| Biochemistry     | 1                 | 6                | 149                              | 4.0%          | 24.92  | Middle Eastern    | 1                 | 1                | 105                              | 1.0%          | 105.23 |
| Biochemistry     | 2                 | 6                | 124                              | 4.8%          | 20.72  | Middle Eastern    | 2                 | 1                | 65                               | 1.5%          | 64.77  |
| Biochemistry     | 3                 | 17               | 431                              | 3.9%          | 25.35  | Middle Eastern    | 3                 | 6                | 287                              | 2.1%          | 47.83  |
| Chemistry        | 1                 | 28               | 803                              | 3.5%          | 28.68  | Molecular Bio.    | 1                 | 21               | 178                              | 11.8%         | 8.45   |
| Chemistry        | 2                 | 34               | 488                              | 7.0%          | 14.36  | Molecular Bio.    | 2                 | 16               | 212                              | 7.6%          | 13.24  |
| Chemistry        | 3                 | 21               | 726                              | 2.9%          | 34.57  | Molecular Bio.    | 3                 | 23               | 621                              | 3.7%          | 27.00  |
| Classics         | 1                 | 7                | 51                               | 13.8%         | 7.23   | Music Theory      | 1                 | 6                | 306                              | 2.0%          | 51.08  |
| Classics         | 2                 | 6                | 36                               | 16.5%         | 6.06   | Music Theory      | 2                 | 3                | 58                               | 5.2%          | 19.17  |
| Classics         | 3                 | 11               | 212                              | 5.2%          | 19.27  | Music Theory      | 3                 | 19               | 379                              | 5.0%          | 19.95  |
| Communication    | 1                 | 3                | 100                              | 3.0%          | 33.29  | Neuroscience      | 1                 | 9                | 51                               | 17.6%         | 5.68   |
| Communication    | 2                 | 14               | 179                              | 7.8%          | 12.79  | Neuroscience      | 2                 | 23               | 50                               | 46.1%         | 2.17   |
| Communication    | 3                 | 26               | 424                              | 6.1%          | 16.31  | Neuroscience      | 3                 | 10               | 577                              | 1.7%          | 57.70  |
| Comparative Lit. | 1                 | 9                | 156                              | 5.8%          | 17.29  | Philosophy        | 1                 | 28               | 236                              | 11.9%         | 8.43   |
| Comparative Lit. | 2                 | 20               | 242                              | 8.3%          | 12.12  | Philosophy        | 2                 | 9                | 108                              | 8.3%          | 12.00  |
| Comparative Lit. | 3                 | 14               | 213                              | 6.6%          | 15.21  | Philosophy        | 3                 | 21               | 265                              | 7.9%          | 12.62  |
| Computer Science | 1                 | 24               | 706                              | 3.4%          | 29.41  | Physics           | 1                 | 42               | 307                              | 13.7%         | 7.30   |
| Computer Science | 2                 | 4                | 161                              | 2.5%          | 40.32  | Physics           | 2                 | 17               | 67                               | 25.3%         | 3.96   |
| Computer Science | 3                 | 19               | 702                              | 2.7%          | 36.95  | Physics           | 3                 | 45               | 786                              | 5.7%          | 17.47  |
| Earth Sciences   | 1                 | 23               | 248                              | 9.3%          | 10.79  | Political Science | 1                 | 38               | 312                              | 12.2%         | 8.22   |
| Earth Sciences   | 2                 | 11               | 141                              | 7.8%          | 12.80  | Political Science | 2                 | 34               | 237                              | 14.4%         | 6.96   |
| Earth Sciences   | 3                 | 20               | 633                              | 3.2%          | 31.65  | Political Science | 3                 | 40               | 513                              | 7.8%          | 12.83  |
| Economics        | 1                 | 39               | 544                              | 7.2%          | 13.96  | Psychology        | 1                 | 19               | 206                              | 9.2%          | 10.82  |
| Economics        | 2                 | 15               | 286                              | 5.3%          | 19.03  | Psychology        | 2                 | 72               | 531                              | 13.6%         | 7.38   |

|                    |   |    |      |       |       |            |   |    |     |       |       |
|--------------------|---|----|------|-------|-------|------------|---|----|-----|-------|-------|
| Economics          | 3 | 31 | 561  | 5.5%  | 18.10 | Psychology | 3 | 52 | 844 | 6.2%  | 16.23 |
| Education          | 1 | 13 | 99   | 13.1% | 7.65  | Sociology  | 1 | 27 | 217 | 12.5% | 8.03  |
| Education          | 2 | 18 | 225  | 8.0%  | 12.47 | Sociology  | 2 | 51 | 343 | 14.9% | 6.73  |
| Education          | 3 | 27 | 683  | 4.0%  | 25.30 | Sociology  | 3 | 39 | 349 | 11.2% | 8.95  |
| Engineering        | 1 | 23 | 1124 | 2.0%  | 48.88 | Spanish    | 1 | 2  | 40  | 5.0%  | 20.05 |
| Engineering        | 2 | 11 | 321  | 3.4%  | 29.16 | Spanish    | 2 | 8  | 60  | 13.4% | 7.49  |
| Engineering        | 3 | 69 | 1400 | 4.9%  | 20.29 | Spanish    | 3 | 12 | 296 | 4.1%  | 24.67 |
| English Literature | 1 | 13 | 196  | 6.6%  | 15.07 | Statistics | 1 | 8  | 237 | 3.4%  | 29.57 |
| English Literature | 2 | 21 | 325  | 6.5%  | 15.48 | Statistics | 2 | 9  | 168 | 5.3%  | 18.72 |
| English Literature | 3 | 32 | 807  | 4.0%  | 25.22 | Statistics | 3 | 11 | 319 | 3.4%  | 29.00 |

<sup>1</sup> Cell 1 = male graduate students; Cell 2 = female graduate students; Cell 3 = post-docs and faculty.



**Table S7: Weighted Hierarchical Regression Models Predicting Female Representation**

| Predictor                      | Model 1       |               |             | Model 2       |               |             | Model 3      |              |             | Model 4       |              |             | Model 5      |              |             |
|--------------------------------|---------------|---------------|-------------|---------------|---------------|-------------|--------------|--------------|-------------|---------------|--------------|-------------|--------------|--------------|-------------|
|                                | $\beta$       | <i>t</i>      | <i>P</i>    | $\beta$       | <i>t</i>      | <i>P</i>    | $\beta$      | <i>t</i>     | <i>P</i>    | $\beta$       | <i>t</i>     | <i>P</i>    | $\beta$      | <i>t</i>     | <i>P</i>    |
| STEM indicator                 | <b>-.50**</b> | <b>-3.03</b>  | <b>.005</b> | <b>-.39*</b>  | <b>-2.59</b>  | <b>.015</b> | (-.46)       | (-1.83)      | (.079)      | (-.39)        | (-1.58)      | (.128)      | (-.25)       | (-.87)       | (.393)      |
| Field-specific Ability Beliefs |               |               |             | <b>-.43**</b> | <b>-2.87</b>  | <b>.008</b> | <b>-.42*</b> | <b>-2.57</b> | <b>.016</b> | <b>-.45**</b> | <b>-2.88</b> | <b>.008</b> | <b>-.40*</b> | <b>-2.33</b> | <b>.029</b> |
| On-Campus Hours Worked         |               |               |             |               |               |             | (.08)        | (.34)        | (.739)      | (.18)         | (.73)        | (.471)      | (.24)        | (.94)        | (.357)      |
| Selectivity                    |               |               |             |               |               |             |              |              |             | (.29)         | (1.70)       | (.103)      | (.31)        | (1.81)       | (.083)      |
| Systemizing vs. Empathizing    |               |               |             |               |               |             |              |              |             |               |              |             | (-.23)       | (-.86)       | (.396)      |
| $R^2$                          |               | <b>.25</b>    |             |               | <b>.42</b>    |             |              | (.43)        |             |               | (.49)        |             |              | (.50)        |             |
| <i>F</i> for change in $R^2$   |               | <b>9.19**</b> |             |               | <b>8.22**</b> |             |              | (.11)        |             |               | (2.87)       |             |              | (.75)        |             |
| <i>P</i> for change in $R^2$   |               | <b>.005</b>   |             |               | <b>.008</b>   |             |              | (.739)       |             |               | (.103)       |             |              | (.396)       |             |

Notes. *N* = 30 disciplines. Significant statistics are bolded; non-significant ones are placed in parentheses.  $R^2$  comparisons are always with the preceding model (to the left). \*  $p < .05$ . \*\*  $p < .01$ . \*\*\*  $p < .001$ .

**Table S8: Individual Responses**

| DIS | Q1 | Q2 | Q3 | Q4 | Q5 | Q6 | Q7 | Q8 | Q9 | Q10 | Q11 | Q12 | Q13 | Q14 | Q15 | Q16 | Q17 | Q18 | Q19 | Q20 | Q21 | Q22 | Q23 | Q24 | Q25 | Q26 | Q27 | Q28 | Q29 | Q30 | R29 | R30 |    |
|-----|----|----|----|----|----|----|----|----|----|-----|-----|-----|-----|-----|-----|-----|-----|-----|-----|-----|-----|-----|-----|-----|-----|-----|-----|-----|-----|-----|-----|-----|----|
| ANT | 6  | 6  | 2  | 1  | 6  | 5  | 2  | 1  | 7  | 7   | 6   | 6   | 7   | 1   | 6   | 6   | 6   | 1   | 2   | 2   |     | 5   |     | 1   | 2   | 4   | 1   | 5   | 4   | 4   | 4   | 4   |    |
| ANT | 5  | 4  | 6  | 6  | 6  | 4  | 5  | 6  | 6  | 6   | 7   | 7   | 6   | 1   | 1   | 5   | 6   | 1   | 1   | 2   |     | 1   |     |     | 1   | 2   | 1   | 2   | 5   | 5   | 5   | 5   |    |
| ANT | 7  | 6  | 1  | 3  | 6  | 5  | 1  | 4  | 7  | 7   | 5   | 5   | 6   | 1   | 4   | 7   | 3   | 1   | 1   | 2   |     | 1   |     |     | 2   | 2   | 1   | 5   | 1   | 7   | 1   | 7   |    |
| ANT | 5  | 6  | 2  | 2  | 6  | 6  | 2  | 2  | 7  | 5   | 7   | 6   | 6   | 1   | 3   | 5   | 5   | 1   | 1   | 2   |     | 1   |     |     |     | 2   | 1   | 1   | 5   | 4   | 2   | 4   | 2  |
| ANT | 6  | 6  | 2  | 2  | 6  | 6  | 1  | 3  | 7  | 7   | 6   | 5   | 8   | 2   | 2   | 2   | 7   | 1   | 1   | 2   |     | 5   |     | 1   | 2   | 5   | 1   | 5   | 5   | 2   | 5   | 2   |    |
| ANT | 1  | 1  | 5  | 5  | 1  | 2  | 5  | 4  | 7  | 7   | 7   | 7   | 8   | 1   | 1   | 7   | 7   | 1   | 1   | 2   |     | 5   |     | 1   | 2   | 3   | 1   | 2   | 5   | 3   | 5   | 3   |    |
| ANT | 7  | 3  | 6  | 5  | 4  | 5  | 5  | 3  | 5  | 5   | 7   | 6   | 6   | 1   | 4   | 6   | 5   | 1   | 1   | 2   |     | 1   |     |     |     | 2   | 2   | 1   | 5   | 2   | 6   | 2   | 6  |
| ANT | 5  | 6  | 5  | 6  | 4  | 5  | 2  | 5  | 7  | 7   | 7   | 6   | 7   | 1   | 2   | 5   | 6   | 1   | 1   | 2   |     | 1   |     |     |     | 2   | 1   | 1   | 5   | 1   | 8   | 1   | 8  |
| ANT | 4  | 5  | 3  | 3  | 5  | 5  | 3  | 3  | 6  | 6   | 4   | 4   | 6   | 1   | 3   | 7   | 5   | 1   | 1   | 2   |     | 1   |     |     |     | 2   | 1   | 1   | 5   | 1   | 4   | 1   | 4  |
| ANT | 3  | 3  | 2  | 4  | 2  | 2  | 5  | 3  | 6  | 4   | 6   | 6   | 8   | 1   | 3   | 5   | 4   | 1   | 1   | 2   |     | 6   | EM  |     |     | 2   | 6   | 1   | 5   | 1   | 5   | EM  | EM |
| ANT | 3  | 4  | 3  | 2  | 3  | 5  | 2  | 2  | 7  | 7   | 7   | 6   | 8   | 1   | 3   | 3   | 6   | 1   | 1   | 2   |     | 1   |     |     |     | 2   | 2   | 1   | 5   | 1   | 5   | 1   | 5  |
| ANT | 5  | 5  | 2  | 5  | 7  | 5  | 1  | 4  | 5  | 7   | 7   | 5   | 7   | 1   | 5   | 7   | 5   | 1   | 1   | 2   |     | 1   |     |     |     | 2   | 2   | 1   | 5   | 3   | 6   | 3   | 6  |
| ANT | 1  | 1  | 1  | 1  | 5  | 6  | 4  | 6  | 2  | 2   | 2   | 3   | 7   | 1   | 3   | 1   | 2   | 1   | 1   | 2   |     | 5   |     | 1   | 1   | 3   | 1   | 5   | 6   | 2   | 6   | 2   |    |
| ANT | 4  | 5  | 3  | 5  | 3  | 3  | 3  | 6  | 2  | 6   | 3   | 4   | 8   | 2   | 2   | 3   | 6   | 1   | 1   | 2   |     | 5   |     | 1   | 1   | 5   | 1   | 5   | 4   | 3   | 4   | 3   |    |
| ANT | 2  | 2  | 7  | 4  | 5  | 5  | 2  | 4  | 6  | 6   | 5   | 6   | 6   | 1   | 4   | 7   | 1   | 1   | DK  | 2   |     | 3   |     | 1   | 2   | 2   | 1   | 5   | 1   | 4   | 1   | 4   |    |
| ANT | 5  | 5  | 4  | 6  | 6  | 6  | 5  | 6  | 6  | 6   | 4   | 4   | 6   | 1   | 1   | 5   | 6   | 1   | 1   | 2   |     | 4   |     | 2   | 2   | 2   | 1   | 5   | 5   | 3   | 5   | 3   |    |
| ANT | 2  | 2  | 5  | 5  | 2  | 2  | 5  | 4  | 7  | 7   | 7   | 7   | 7   | 1   | 1   | 5   | 6   | 1   | 1   | 2   |     | 1   |     |     |     | 2   | 1   | 1   | 5   | 3   | 3   | 3   | 3  |
| ANT | 4  | 4  | 4  | 4  | 3  | 3  | 5  | 5  | 7  | 7   | 7   | 6   | 7   | 1   | 2   | 5   | 7   | 1   | 1   | 2   |     | 1   |     |     |     | 2   | 1   | 1   | 3   | 2   | 4   | 2   | 4  |
| ANT | 6  | 6  | 3  | 5  | 2  | 2  | 6  | 6  | 7  | 7   | 7   | 7   | 8   | 1   | 2   | 7   | 7   | 1   | 1   | 2   |     | 1   |     |     |     | 1   | 1   | 2   |     | 2   | 6   | 2   | 6  |
| ANT | 3  | 3  | 7  | 7  | 7  | 7  | 1  | 1  | 6  | 6   | 6   | 5   | 7   | 1   | 5   | 3   | 6   | 1   | 1   | 1   |     | 1   |     |     |     | 1   | 1   | 1   | 2   | 3   | 8   | 3   | 8  |
| ANT | 3  | 5  | 3  | 6  | 3  | 5  | 4  | 5  | 7  | 7   | 7   | 7   | 6   | 1   | 1   | 2   | 5   | 1   | 2   | 1   |     | 1   |     |     |     | 2   | 1   | 1   | 5   | 2   | 5   | 2   | 5  |
| ANT | 5  | 4  | 2  | 4  | 7  | 5  | 1  | 4  | 7  | 7   | 7   | 6   | 7   | 1   | 2   | 6   | 4   | 1   | 1   | 1   |     | 3   |     | 3   | 2   | 4   | 1   | 5   | 2   | 6   | 2   | 6   |    |
| ANT | 4  | 4  | 3  | 5  | 5  | 5  | 2  | 3  | 5  | 5   | 4   | 3   | 7   | 4   | 1   | 3   | 6   | 1   | 1   | 1   |     | 5   |     | 2   | 1   | 4   | 1   | 5   | 5   | 2   | 5   | 2   |    |
| ANT | 4  | 4  | 4  | 4  | 4  | 4  | 4  | 4  | 4  | 4   | 6   | 6   | 6   | 1   | 1   | 5   | 6   | 1   | 1   | 1   |     | 1   |     |     |     | 1   | 1   | 1   | 5   | 4   | 3   | 4   | 3  |
| ANT | 6  | 6  | 3  | 4  | 2  | 5  | 7  | 5  | 7  | 7   | 7   | 5   | 8   | 1   | 5   | 6   | 6   | 1   | 1   | 1   |     | 1   |     |     |     | 1   | 1   | 2   | 5   | 2   | 5   | 2   | 5  |
| ANT | 3  | 1  | 4  | 5  | 4  | 2  | 4  | 6  | 7  | 7   | 7   | 6   | 7   | 1   | 3   | 5   | 5   | 1   | 1   | 2   |     | 1   |     |     |     | 1   | 1   | 1   | 5   | 2   | 4   | 2   | 4  |
| ANT | 5  | 5  | 5  | 3  | 5  | 6  | 4  | 3  | 6  | 7   | 7   | 5   | 6   | 1   | 2   | 2   | 6   | 1   | 1   | 2   |     | 1   |     |     |     | 2   | 1   | 1   | 5   | 2   | 3   | 2   | 3  |
| ANT | 3  | 3  | 5  | 5  | 5  | 4  | 5  | 5  | 5  | 6   | 7   | 7   | 7   | 2   | 3   | 3   | 5   | 1   | 1   | 2   |     | 1   |     |     |     | 2   | 1   | 2   | 5   | 4   | 2   | 4   | 2  |
| ANT | 7  | 6  | 5  | 3  | 7  | 5  | 3  | 4  | 7  | 7   | 7   | 4   | 7   | 1   | 1   | 1   | 7   | 1   | 2   | 2   |     | 1   |     |     |     | 1   | 1   | 1   | 5   | 6   | 5   | 6   | 5  |

|     |   |   |   |   |   |   |   |   |   |   |   |   |   |   |   |   |   |   |   |   |   |    |   |   |   |   |   |   |    |    |
|-----|---|---|---|---|---|---|---|---|---|---|---|---|---|---|---|---|---|---|---|---|---|----|---|---|---|---|---|---|----|----|
| ANT | 4 | 4 | 6 | 6 | 3 | 3 | 5 | 6 | 7 | 5 | 7 | 7 | 8 | 1 | 5 | 7 | 6 | 1 | 1 | 1 | 1 | 2  | 1 | 1 | 5 | 1 | 6 | 1 | 6  |    |
| ANT | 2 | 2 | 6 | 6 | 2 | 2 | 6 | 6 | 6 | 7 | 3 | 4 | 6 | 1 | 1 | 3 | 7 | 1 | 1 | 2 | 2 | 1  | 2 | 1 | 5 | 5 | 3 | 5 | 3  |    |
| ANT | 2 | 1 | 5 | 7 | 2 | 1 | 5 | 7 | 7 | 7 | 5 | 3 | 8 | 1 | 1 | 4 | 7 | 1 | 2 | 2 | 1 | 2  | 3 | 1 | 5 | 4 | 2 | 4 | 2  |    |
| ANT | 5 | 4 | 6 | 6 | 5 | 4 | 6 | 6 | 7 | 7 | 3 | 3 | 7 | 1 | 2 | 3 | 7 | 1 | 1 | 2 | 5 | 1  | 2 | 3 | 2 | 5 | 4 | 5 | 4  | 5  |
| ANT | 2 | 3 | 3 | 2 | 3 | 3 | 3 | 3 | 6 | 6 | 5 | 5 | 2 | 1 | 1 | 6 | 7 | 1 | 1 | 2 | 4 | 1  | 2 | 2 | 1 | 5 | 5 | 1 | 5  | 1  |
| ANT | 1 | 1 | 1 | 6 | 1 | 1 | 7 | 7 | 7 | 7 | 7 | 7 | 4 | 1 | 1 | 7 | 1 | 1 | 1 | 2 | 1 | 1  | 1 | 2 | 3 | 1 | 7 | 1 | 7  |    |
| ANT | 2 | 2 | 2 | 3 | 2 | 3 | 5 | 4 | 6 | 7 | 5 | 4 | 7 | 1 | 1 | 3 | 5 | 1 | 1 | 2 | 1 | 2  | 2 | 1 | 5 | 4 | 4 | 4 | 4  |    |
| ANT | 5 | 5 | 1 | 2 | 6 | 4 | 1 | 4 | 5 | 6 | 4 | 6 | 7 | 1 | 1 | 1 | 7 | 1 | 1 | 2 | 5 | 1  | 1 | 5 | 5 | 5 | 3 | 5 | 3  |    |
| ANT | 7 | 1 | 5 | 5 | 5 | 1 | 5 | 5 | 3 | 7 | 4 | 4 | 6 | 1 | 1 | 5 | 6 | 1 | 1 | 1 | 1 | 1  | 3 | 1 | 2 | 2 | 2 | 2 | 2  |    |
| ANT | 4 | 4 | 2 | 5 | 4 | 4 | 4 | 5 | 7 | 7 | 5 | 4 | 7 | 1 | 5 | 6 | 7 | 1 | 1 | 2 | 1 | 2  | 1 | 1 | 5 | 1 | 6 | 1 | 6  |    |
| ANT | 2 | 3 | 2 | 3 | 5 | 5 | 2 | 2 | 6 | 6 | 6 | 5 | 4 | 3 | 4 | 6 | 5 | 1 | 2 | 2 | 6 | AD | 2 | 4 | 1 | 3 | 1 | 8 | 1  | 8  |
| ANT | 2 | 2 | 6 | 5 | 1 | 3 | 5 | 7 | 6 | 5 | 7 | 6 | 6 | 1 | 1 | 5 | 5 | 1 | 1 | 2 | 1 | 2  | 1 | 1 | 5 | 1 | 4 | 1 | 4  |    |
| ANT | 3 | 2 | 4 | 4 | 3 | 2 | 3 | 5 | 3 | 4 | 4 | 3 | 6 | 1 | 2 | 5 | 4 | 1 | 1 | 2 | 5 | 5  | 1 | 4 | 1 | 6 | 6 | 2 | 6  | 2  |
| ANT | 6 | 6 | 6 | 4 | 6 | 5 | 2 | 5 | 6 | 4 | 7 | 7 | 5 | 1 | 2 | 7 | 7 | 1 | 1 | 2 | 1 | 2  | 2 | 1 | 5 | 2 | 2 | 2 | 2  |    |
| ANT | 5 | 3 | 1 | 1 | 6 | 7 | 4 | 5 | 6 | 7 | 7 | 5 | 4 | 1 | 6 | 7 | 5 | 1 | 1 | 1 | 6 | RG | 2 | 2 | 1 | 5 | 3 | 5 | 3  | 5  |
| ANT | 3 | 2 | 6 | 6 | 3 | 3 | 6 | 6 | 6 | 7 | 4 | 5 | 7 | 2 | 3 | 5 | 6 | 1 | 1 | 2 | 1 | 2  | 3 | 1 | 5 | 1 | 4 | 1 | 4  |    |
| ANT | 1 | 3 | 5 | 7 | 3 | 3 | 7 | 7 | 6 | 7 | 7 | 7 | 6 | 1 | 1 | 3 | 7 | 1 | 1 | 2 | 1 | 1  | 1 | 1 | 5 | 3 | 4 | 3 | 4  |    |
| ANT | 5 | 3 | 3 | 5 | 6 | 5 | 3 | 4 | 7 | 7 | 7 | 6 | 6 | 1 | 1 | 6 | 6 | 1 | 2 | 1 | 1 | 2  | 2 | 1 | 5 | 2 | 5 | 2 | 5  |    |
| ANT | 2 | 3 | 4 | 4 | 2 | 2 | 3 | 5 | 7 | 7 | 7 | 7 | 7 | 1 | 2 | 6 | 6 | 1 | 1 | 2 | 1 | 2  | 1 | 1 | 5 | 3 | 3 | 3 | 3  |    |
| ANT | 2 | 2 | 7 | 7 | 5 | 2 | 5 | 2 | 7 | 7 | 7 | 6 | 8 | 1 | 1 | 1 | 7 | 1 | 2 | 2 | 1 | 2  | 1 | 1 | 5 | 2 | 4 | 2 | 4  |    |
| ANT | 4 | 4 | 4 | 4 | 4 | 4 | 4 | 4 | 7 | 7 | 5 | 6 | 6 | 5 | 2 | 6 | 7 | 1 | 1 | 2 | 1 | 2  | 1 | 1 | 5 | 5 | 2 | 5 | 2  |    |
| ANT | 1 | 1 | 5 | 5 | 1 | 1 | 7 | 5 | 6 | 7 | 4 | 4 | 7 | 1 | 3 | 6 | 5 | 1 | 1 | 1 | 1 | 1  | 2 | 1 | 3 | 3 | 3 | 3 | 3  |    |
| ANT | 4 | 4 | 4 | 4 | 5 | 3 | 5 | 3 | 6 | 4 | 6 | 6 | 6 | 1 | 2 | 4 | 5 | 1 | 1 | 2 | 1 | 2  | 1 | 2 | 1 | 5 | 1 | 5 | 1  | 5  |
| ANT | 5 | 6 | 3 | 6 | 5 | 5 | 5 | 5 | 6 | 7 | 5 | 5 | 7 | 1 | 1 | 3 | 7 | 1 | 1 | 2 | 1 | 2  | 1 | 1 | 5 | 5 | 1 | 5 | 1  |    |
| ANT | 1 | 1 | 5 | 7 | 1 | 1 | 6 | 6 | 7 | 7 | 7 | 7 | 7 | 1 | 2 | 2 | 7 | 1 | 1 | 2 | 1 | 1  | 1 | 1 | 3 | 3 | 3 | 3 | 3  |    |
| ANT | 3 | 4 | 3 | 5 | 5 | 5 | 2 | 5 | 6 | 7 | 5 | 3 | 7 | 1 | 5 | 6 | 5 | 1 | 1 | 2 | 1 | 2  | 1 | 1 | 5 | 3 | 3 | 3 | 3  |    |
| ANT | 1 | 1 | 7 | 5 | 2 | 2 | 6 | 6 | 7 | 7 | 7 | 7 | 7 | 1 | 1 | 5 | 7 | 1 | 1 | 2 | 1 | 1  | 1 | 1 | 3 | 2 | 3 | 2 | 3  |    |
| ANT | 3 | 3 | 5 | 5 | 4 | 4 | 4 | 4 | 7 | 7 | 5 | 5 | 5 | 3 | 3 | 3 | 5 | 1 | 1 | 2 | 1 | 2  | 2 | 1 | 5 | 4 | 2 | 4 | 2  |    |
| ANT | 1 | 2 | 7 | 6 | 1 | 1 | 7 | 6 | 5 | 6 | 7 | 4 | 8 | 1 | 1 | 3 | 7 | 1 | 1 | 2 | 5 | 3  | 1 | 6 | 1 | 6 | 3 | 3 | 3  | 3  |
| ANT | 4 | 5 | 2 | 2 | 4 | 5 | 2 | 3 | 2 | 7 | 5 | 6 | 6 | 1 | 1 | 6 | 7 | 1 | 2 | 1 | 6 | EM | 1 | 6 | 1 | 5 | 1 | 3 | EM | EM |
| ANT | 2 | 2 | 7 | 6 | 2 | 2 | 6 | 5 | 7 | 7 | 6 | 4 | 6 | 2 | 5 | 4 | 7 | 1 | 2 | 2 | 6 | EM | 1 | 6 | 1 | 2 | 1 | 3 | EM | EM |
| ANT | 4 | 4 | 4 | 4 | 6 | 6 | 6 | 5 | 6 | 7 | 5 | 5 | 7 | 1 | 5 | 6 | 5 | 1 | 2 | 2 | 1 | 2  | 2 | 1 | 2 | 1 | 6 | 1 | 6  |    |

|     |   |   |   |   |   |   |   |   |   |   |   |   |   |   |   |   |   |   |    |   |    |    |    |   |   |   |   |   |    |    |   |
|-----|---|---|---|---|---|---|---|---|---|---|---|---|---|---|---|---|---|---|----|---|----|----|----|---|---|---|---|---|----|----|---|
| ANT | 5 | 4 | 7 | 6 | 7 | 7 | 1 | 1 | 4 | 6 | 2 | 2 | 7 | 1 | 7 | 7 | 3 | 1 | 1  | 2 | 1  | 2  | 1  | 1 | 5 | 5 | 3 | 5 | 3  |    |   |
| ANT | 6 | 6 | 2 | 6 | 2 | 2 | 6 | 6 | 6 | 7 | 2 | 2 | 8 | 1 | 3 | 5 | 7 | 1 | 1  | 2 | 5  | 1  | 2  | 5 | 1 | 5 | 2 | 5 | 2  | 5  |   |
| ANT | 3 | 3 | 6 | 6 | 3 | 3 | 5 | 5 | 4 | 6 | 4 | 3 | 7 | 1 | 2 | 2 | 7 | 1 | 2  | 1 | 2  | 2  | 3  | 1 | 5 | 2 | 4 | 2 | 4  |    |   |
| ANT | 5 | 6 | 2 | 5 | 5 | 4 | 3 | 5 | 6 | 5 | 6 | 5 | 7 | 3 | 2 | 4 | 7 | 1 | 1  | 1 | 6  | EM | 1  | 6 | 1 | 5 | 2 | 4 | EM | EM |   |
| ANT | 4 | 4 | 6 | 6 | 5 | 5 | 2 | 4 | 6 | 6 | 7 | 4 | 6 | 2 | 3 | 6 | 5 | 1 | 1  | 1 | 1  | 2  | 1  | 1 | 5 | 4 | 3 | 4 | 3  |    |   |
| ANT | 3 | 5 | 2 | 6 | 2 | 2 | 6 | 5 | 7 | 7 | 5 | 5 | 7 | 1 | 4 | 4 | 6 | 1 | 1  | 1 | 1  | 2  | 1  | 1 | 5 | 4 | 2 | 4 | 2  |    |   |
| ANT | 3 | 3 | 5 | 6 | 3 | 2 | 6 | 6 | 6 | 7 | 6 | 5 | 4 | 1 | 2 | 7 | 6 | 1 | 1  | 1 | 1  | 2  | 1  | 1 | 5 | 5 | 3 | 5 | 3  |    |   |
| ANT | 2 | 3 | 6 | 6 | 4 | 4 | 5 | 5 | 4 | 5 | 6 | 6 | 6 | 1 | 2 | 5 | 4 | 1 | 1  | 2 | 5  | 3  | 1  | 4 | 1 | 6 | 3 | 3 | 3  | 3  |   |
| ARC | 5 | 6 | 1 | 5 | 6 | 6 | 1 | 4 | 6 | 6 | 5 | 1 | 7 | 1 | 1 | 7 | 6 | 1 | DK | 2 | 3  | 2  | 2  | 2 | 1 | 5 | 5 | 1 | 5  | 1  |   |
| ARC | 1 | 2 | 7 | 2 | 4 | 2 | 4 | 4 | 3 | 3 | 3 | 3 | 7 | 2 | 2 | 2 | 7 | 1 | 1  | 2 | 1  | 1  | 1  | 1 | 5 | 3 | 2 | 3 | 2  |    |   |
| ARC | 5 | 2 | 5 | 6 | 3 | 5 | 2 | 6 | 7 | 7 | 4 | 4 | 6 | 1 | 1 | 6 | 2 | 1 | DK | 2 | 1  | 2  | 2  | 1 | 5 | 3 | 3 | 3 | 3  |    |   |
| ARC | 1 | 2 | 5 | 6 | 2 | 1 | 4 | 5 | 5 | 7 | 2 | 1 | 5 | 1 | 2 | 6 | 5 | 1 | 2  | 2 | 1  | 2  | 1  | 1 | 5 | 2 | 5 | 2 | 5  |    |   |
| ARC | 3 | 4 | 6 | 4 | 4 | 4 | 4 | 4 | 5 | 7 | 3 | 4 | 5 | 1 | 4 | 6 | 5 | 1 | 1  | 2 | 4  | 2  | 1  | 2 | 1 | 5 | 5 | 3 | 5  | 3  |   |
| ARC | 5 | 5 | 4 | 3 | 4 | 6 | 1 | 3 | 5 | 7 | 4 | 5 | 6 | 1 | 6 | 7 | 2 | 1 | 1  | 2 | 1  | 2  | 1  | 1 | 5 | 2 | 2 | 2 | 2  |    |   |
| ARC | 6 | 6 | 6 | 6 | 6 | 6 | 5 | 5 | 7 | 7 | 7 | 4 | 7 | 1 | 5 | 7 | 4 | 1 | 1  | 2 | 6  | 1  | 5  | 1 | 5 | 8 | 1 | 8 | 1  |    |   |
| ARC | 1 | 1 | 7 | 6 | 2 | 4 | 7 | 6 | 5 | 7 | 2 | 1 | 5 | 1 | 6 | 7 | 4 | 1 | 1  | 1 | 1  | 2  | 2  | 1 | 5 | 1 | 7 | 1 | 7  |    |   |
| ARC | 5 | 4 | 2 | 4 | 5 | 5 | 3 | 3 | 7 | 7 | 4 | 4 | 6 | 1 | 6 | 7 | 4 | 1 | 1  | 1 | 1  | 1  | 2  | 1 | 1 | 5 | 6 | 2 | 6  | 2  |   |
| ARC | 7 | 1 | 5 | 4 | 4 | 6 | 7 | 5 | 7 | 7 | 1 | 1 | 6 | 1 | 4 | 7 | 7 | 1 | 1  | 1 | 1  | 1  | 1  | 1 | 5 | 4 | 4 | 4 | 4  |    |   |
| ARC | 3 | 5 | 5 | 5 | 3 | 5 | 5 | 5 | 6 | 7 | 3 | 2 | 6 | 1 | 2 | 6 | 6 | 1 | 1  | 1 | 3  | 1  | 2  | 4 | 1 | 5 | 4 | 2 | 4  | 2  |   |
| ARC | 5 | 5 | 4 | 5 | 6 | 5 | 4 | 5 | 6 | 7 | 2 | 4 | 6 | 1 | 4 | 6 | 6 | 1 | 1  | 4 | SS | 6  | DI | 1 | 5 | 1 | 5 | 5 | 2  | 5  | 2 |
| ARC | 1 | 1 | 1 | 1 | 4 | 4 | 4 | 4 | 7 | 7 | 4 | 3 | 7 | 1 | 4 | 7 | 7 | 1 | 1  | 2 | 5  | 2  | 1  | 5 | 1 | 5 | 2 | 4 | 2  | 4  |   |
| ARC | 1 | 1 | 7 | 6 | 1 | 1 | 7 | 6 | 6 | 6 | 4 | 4 | 6 | 1 | 2 | 3 | 5 | 1 | 1  | 1 | 1  | 1  | 2  | 2 | 1 | 5 | 5 | 3 | 5  | 3  |   |
| ARC | 1 | 1 | 7 | 4 | 1 | 2 | 5 | 4 | 5 | 4 | 4 | 4 | 8 | 1 | 1 | 4 | 4 | 1 | 1  | 2 | 1  | 1  | 1  | 1 | 3 | 7 | 2 | 7 | 2  |    |   |
| ARC | 6 | 6 | 3 | 7 | 5 | 5 | 1 | 6 | 6 | 6 | 5 | 2 | 2 | 1 | 5 | 5 | 5 | 1 | 1  | 1 | 1  | 1  | 1  | 2 | 1 | 5 | 4 | 7 | 4  | 7  |   |
| ARC | 3 | 4 | 3 | 5 | 4 | 5 | 2 | 3 | 7 | 7 | 3 | 3 | 6 | 2 | 5 | 2 | 6 | 1 | 1  | 2 | 1  | 1  | 2  | 1 | 5 | 4 | 2 | 4 | 2  |    |   |
| ARC | 5 | 5 | 7 | 7 | 5 | 5 | 7 | 4 | 7 | 7 | 4 | 4 | 6 | 1 | 4 | 7 | 4 | 1 | 1  | 2 | 1  | 1  | 2  | 1 | 5 | 1 | 3 | 1 | 3  |    |   |
| ARC | 5 | 4 | 6 | 6 | 6 | 4 | 4 | 4 | 6 | 7 | 5 | 2 | 6 | 1 | 3 | 5 | 3 | 1 | 1  | 2 | 1  | 1  | 2  | 1 | 5 | 3 | 4 | 3 | 4  |    |   |
| ARC | 7 | 5 | 6 | 4 | 5 | 4 | 6 | 7 | 6 | 6 | 5 | 2 | 6 | 1 | 5 | 5 | 4 | 1 | 1  | 2 | 2  | 2  | 1  | 2 | 7 | 6 | 2 | 6 | 2  |    |   |
| ARC | 3 | 3 | 4 | 3 | 4 | 4 | 5 | 5 | 5 | 7 | 4 | 3 | 5 | 1 | 5 | 6 | 4 | 1 | 1  | 1 | 5  | 2  | 1  | 3 | 1 | 5 | 5 | 2 | 5  | 2  |   |
| ARC | 6 | 5 | 1 | 2 | 2 | 3 | 6 | 5 | 4 | 7 | 2 | 1 | 6 | 1 | 2 | 2 | 6 | 1 | 1  | 1 | 5  | 1  | 1  | 3 | 1 | 5 | 3 | 3 | 3  | 3  |   |
| ARC | 6 | 6 | 2 | 2 | 6 | 6 | 4 | 4 | 7 | 7 | 4 | 4 | 7 | 1 | 3 | 6 | 6 | 1 | 1  | 1 | 1  | 1  | 2  | 2 | 1 | 5 | 1 | 4 | 1  | 4  |   |
| ARC | 6 | 5 | 1 | 5 |   |   |   |   | 7 | 7 | 2 | 2 | 8 | 2 |   | 5 | 6 | 1 | DK | 1 | 1  | 1  | 2  | 2 | 1 | 2 | 2 | 1 | 2  | 1  |   |

|     |   |   |   |   |   |   |   |   |   |   |   |   |   |   |   |   |   |   |    |   |    |    |   |   |   |   |   |   |    |    |
|-----|---|---|---|---|---|---|---|---|---|---|---|---|---|---|---|---|---|---|----|---|----|----|---|---|---|---|---|---|----|----|
| ARC | 4 | 4 | 5 | 6 | 7 | 7 | 1 | 2 | 7 | 7 | 7 | 7 | 7 | 2 | 7 | 6 | 3 | 1 | 1  | 2 | 1  | 2  | 1 | 1 | 5 | 4 | 2 | 4 | 2  |    |
| ARC | 2 | 3 | 5 | 5 | 4 | 4 | 4 | 4 | 4 | 6 | 3 | 2 | 8 | 1 | 1 | 2 | 6 | 1 | 1  | 2 | 1  | 1  | 1 | 5 | 7 | 2 | 7 | 2 |    |    |
| ARC | 2 | 2 | 2 | 4 | 3 | 3 | 3 | 5 | 6 | 6 | 4 | 4 | 6 | 1 | 2 | 6 | 4 | 1 | 1  | 2 | 1  | 2  | 2 | 1 | 5 | 3 | 3 | 3 | 3  |    |
| ARC | 2 | 1 | 4 | 5 | 5 | 3 | 2 | 5 | 6 | 7 | 6 | 2 | 6 | 1 | 5 | 6 | 4 | 2 | 4  | 4 | RC | 4  | 2 | 2 | 2 | 6 | 6 | 1 | 6  | 1  |
| ARC | 4 | 3 | 5 | 3 | 1 | 2 | 2 | 3 | 7 | 7 | 3 | 3 | 3 | 1 | 6 | 6 | 2 | 1 | 1  | 1 | 1  | 1  | 2 | 3 | 1 | 5 | 6 | 2 | 6  | 2  |
| ARC | 5 | 4 | 5 | 7 | 4 | 3 | 4 | 6 | 4 | 4 | 4 | 4 | 4 | 2 | 2 | 6 | 4 | 2 | DK | 2 | 5  | 1  | 6 | 1 | 5 | 4 | 1 | 4 | 1  |    |
| AHI | 6 | 3 | 5 | 6 | 6 | 5 | 3 | 6 | 7 | 7 | 4 | 2 | 9 | 1 | 1 | 7 | 6 | 2 | 1  | 4 | 3  | 2  | 3 | 1 | 5 | 6 | 3 | 6 | 3  |    |
| AHI | 3 | 4 | 3 | 4 | 4 | 4 | 4 | 4 | 4 | 4 | 5 | 4 | 7 | 1 | 1 | 4 | 5 | 1 | 1  | 5 | 3  | 1  | 3 | 1 | 5 | 2 | 4 | 2 | 4  |    |
| AHI | 6 | 6 | 2 | 2 | 6 | 2 | 2 | 6 | 5 | 7 | 4 | 2 | 8 | 1 | 1 | 2 | 7 | 1 | 2  | 5 | 1  | 2  | 3 | 1 | 5 | 3 | 3 | 3 | 3  |    |
| AHI | 2 | 5 | 6 | 7 | 4 | 6 | 2 | 2 | 7 | 7 | 4 | 4 | 9 | 1 | 1 | 5 | 7 | 1 | 2  | 6 | RG | 2  | 2 | 1 | 5 | 2 | 6 | 2 | 6  |    |
| AHI | 5 | 5 | 3 | 3 | 5 | 5 | 3 | 3 | 6 | 6 | 2 | 3 | 7 | 1 | 2 | 4 | 6 | 1 | 2  | 1 | 6  | RP | 1 | 5 | 1 | 5 | 3 | 3 | 3  | 3  |
| AHI | 4 | 2 | 3 | 4 | 3 | 2 | 4 | 4 | 6 | 6 | 3 | 3 | 7 | 1 | 1 | 2 | 7 | 1 | 1  | 2 | 1  | 1  | 1 | 1 | 5 | 4 | 3 | 4 | 3  |    |
| AHI | 4 | 5 | 3 | 6 | 5 | 5 | 3 | 5 | 6 | 7 | 4 | 4 | 7 | 1 | 5 | 7 | 5 | 1 | 1  | 1 | 1  | 1  | 2 | 2 | 1 | 5 | 5 | 2 | 5  | 2  |
| AHI | 6 | 6 | 1 | 3 | 6 | 5 | 1 | 4 | 6 | 7 | 4 | 2 | 8 | 1 | 1 | 2 | 7 | 1 | 1  | 2 | 1  | 2  | 1 | 1 | 5 | 3 | 3 | 3 | 3  |    |
| AHI | 1 | 7 | 1 | 3 | 1 | 2 | 3 | 5 | 7 | 7 | 6 | 7 | 4 | 1 | 1 | 7 | 5 | 1 | 2  | 1 | 1  | 2  | 2 | 1 | 5 | 2 | 6 | 2 | 6  |    |
| AHI | 3 | 3 | 3 | 4 | 3 | 3 | 3 | 3 | 6 | 6 | 5 | 4 | 7 | 1 | 3 | 5 | 4 | 1 | 2  | 1 | 1  | 2  | 1 | 1 | 5 | 1 | 5 | 1 | 5  |    |
| AHI | 6 | 6 | 3 | 5 | 2 | 3 | 5 | 5 | 7 | 7 | 3 | 2 | 8 | 1 | 3 | 6 | 6 | 1 | 1  | 1 | 1  | 1  | 2 | 1 | 5 | 3 | 6 | 3 | 6  |    |
| AHI | 5 | 5 | 5 | 6 | 2 | 3 | 6 | 6 | 6 | 6 | 5 | 2 | 7 | 1 | 1 | 1 | 7 | 1 | 2  | 1 | 5  | 1  | 1 | 4 | 1 | 5 | 4 | 3 | 4  | 3  |
| AHI | 2 | 2 | 6 | 6 | 2 | 2 | 6 | 6 | 4 | 6 | 7 | 6 | 9 | 1 | 1 | 5 | 7 | 1 | 1  | 1 | 6  | RG | 2 | 2 | 1 | 5 |   |   |    |    |
| AHI | 4 | 4 | 3 | 5 | 4 | 4 | 2 | 2 | 7 | 7 | 6 | 6 | 8 | 1 | 1 | 1 | 7 | 1 | 1  | 1 | 5  | 1  | 1 | 4 | 1 | 5 | 2 | 6 | 2  | 6  |
| AHI | 4 | 4 | 4 | 4 | 6 | 6 | 3 | 3 | 6 | 7 | 7 | 5 | 9 | 5 | 4 | 7 | 7 | 1 | 2  | 1 | 1  | 2  | 2 | 1 | 5 | 4 | 4 | 4 | 4  |    |
| AHI | 4 | 5 | 6 | 5 | 4 | 5 | 5 | 6 | 7 | 7 | 7 | 5 | 9 | 3 | 3 | 5 | 7 | 1 | 1  | 1 | 1  | 2  | 2 | 1 | 2 | 5 | 3 | 5 | 3  |    |
| AHI | 1 | 1 | 5 | 6 | 6 | 4 | 5 | 3 | 6 | 7 | 3 | 2 | 8 | 1 | 4 | 7 | 4 | 1 | 1  | 1 | 1  | 2  | 2 | 1 | 5 | 2 | 3 | 2 | 3  |    |
| AHI | 6 | 6 | 4 | 3 | 7 | 7 | 2 | 2 | 5 | 7 | 6 | 4 | 9 | 3 | 5 | 7 | 7 | 1 | 1  | 2 | 5  | 3  | 2 | 6 | 1 | 5 | 4 | 4 | 4  | 4  |
| AHI | 2 | 2 | 3 | 5 | 2 | 2 | 2 | 5 | 6 | 6 | 5 | 2 | 8 | 1 | 2 | 6 | 5 | 1 | 1  | 2 | 4  | 2  | 1 | 3 |   | 3 | 5 | 3 | 5  |    |
| AHI | 1 | 1 | 7 | 7 | 3 | 6 | 1 | 3 | 7 | 7 | 3 | 2 | 9 | 1 | 1 | 5 | 3 | 1 | 2  | 2 | 1  | 2  | 2 | 2 | 5 | 1 | 4 | 1 | 4  |    |
| AHI | 5 | 4 | 3 | 5 | 5 | 4 | 4 | 4 | 5 | 5 | 5 | 3 | 7 | 1 | 3 | 7 | 3 | 1 | 1  | 2 | 1  | 2  | 3 | 1 | 5 | 2 | 5 | 2 | 5  |    |
| AHI | 6 | 5 | 4 | 4 | 5 | 6 | 4 | 6 | 6 | 6 | 5 | 3 | 8 | 3 | 2 | 4 | 6 | 1 | 3  | 2 | 1  | 2  | 1 | 5 | 2 | 6 | 2 | 6 |    |    |
| AHI | 6 | 5 | 4 | 6 | 5 | 6 | 2 | 4 | 5 | 7 | 4 | 2 | 6 | 1 | 1 | 7 | 5 | 1 | DK | 2 | 1  | 2  | 2 | 1 | 5 | 1 | 3 | 1 | 3  |    |
| AHI | 2 | 5 | 4 | 5 | 4 | 4 | 4 | 4 | 6 | 6 | 6 | 3 | 6 | 1 | 1 | 1 | 7 | 1 | 2  | 2 | 6  | EM | 2 | 6 | 1 | 5 | 1 | 4 | EM | EM |
| AHI | 3 | 6 | 3 | 3 | 3 | 3 | 2 | 3 | 6 | 5 | 6 | 3 | 8 | 1 | 4 | 6 | 3 | 2 | 1  | 2 | 3  | 1  | 3 | 1 | 5 | 4 | 2 | 4 | 2  |    |
| AHI | 2 | 2 | 6 | 6 | 2 | 2 | 7 | 7 | 7 | 7 | 3 | 3 | 8 | 1 | 1 | 4 | 7 | 1 | 2  | 2 | 1  | 2  | 1 | 5 | 1 | 3 | 1 | 3 |    |    |

|     |   |   |   |   |   |   |   |   |   |   |   |   |   |   |   |   |   |   |   |   |   |    |   |   |   |   |   |   |   |   |   |
|-----|---|---|---|---|---|---|---|---|---|---|---|---|---|---|---|---|---|---|---|---|---|----|---|---|---|---|---|---|---|---|---|
| AHI | 5 | 5 | 3 | 3 | 6 | 6 | 3 | 3 | 6 | 7 | 6 | 2 | 8 | 3 | 4 | 5 | 5 | 1 | 1 | 1 | 1 | 1  | 1 | 1 | 1 | 1 | 5 | 1 | 5 | 1 | 5 |
| AHI | 6 | 5 | 5 | 3 | 5 | 5 | 6 | 6 | 2 | 6 | 3 | 2 | 9 | 1 | 1 | 6 | 5 | 1 | 2 | 1 | 5 | 2  | 1 | 4 | 1 | 6 | 3 | 5 | 3 | 5 |   |
| AHI | 5 | 3 | 1 | 5 | 5 | 5 | 1 | 6 | 4 | 6 | 5 | 2 | 8 | 1 | 1 | 1 | 7 | 1 | 3 | 1 | 5 | 4  | 1 | 4 | 1 | 5 | 4 | 3 | 4 | 3 |   |
| AST | 1 | 1 | 5 | 5 | 2 | 2 | 4 | 4 | 7 | 7 | 2 | 3 | 3 | 1 | 5 | 6 | 5 | 1 | 2 | 2 | 2 | 2  | 2 | 1 | 5 | 5 | 2 | 5 | 2 |   |   |
| AST | 2 | 2 | 5 | 5 | 2 | 2 | 5 | 5 | 7 | 7 | 1 | 1 | 6 | 1 | 1 | 2 | 7 | 1 | 2 | 1 | 1 | 1  | 1 | 1 | 5 | 3 | 1 | 3 | 1 |   |   |
| AST | 4 | 3 | 5 | 6 | 5 | 5 | 4 | 6 | 6 | 7 | 1 | 2 | 6 | 1 | 4 | 7 | 3 | 1 | 2 | 1 | 1 | 2  | 1 | 5 | 7 | 1 | 7 | 1 |   |   |   |
| AST | 4 | 6 | 1 | 4 | 4 | 4 | 1 | 6 | 7 | 7 | 1 | 1 | 4 | 1 | 1 | 6 | 5 | 1 | 2 | 1 | 2 | 1  | 5 | 4 | 2 | 4 | 2 |   |   |   |   |
| AST | 6 | 5 | 4 | 4 | 5 | 6 | 4 | 5 | 6 | 6 | 2 | 3 | 4 | 1 | 4 | 6 | 4 | 1 | 2 | 1 | 1 | 2  | 1 | 5 | 4 | 1 | 4 | 1 |   |   |   |
| AST | 2 | 2 | 3 | 3 | 5 | 5 | 3 | 3 | 7 | 7 | 2 | 4 | 4 | 1 | 1 | 7 | 3 | 1 | 2 | 1 | 5 | 2  | 1 | 2 | 1 | 5 | 4 | 2 | 4 | 2 |   |
| AST | 2 | 4 | 7 | 6 | 3 | 4 | 7 | 5 | 7 | 7 | 1 | 2 | 3 | 1 | 7 | 7 | 1 | 1 | 2 | 1 | 2 | 2  | 1 | 5 | 5 | 1 | 5 | 1 |   |   |   |
| AST | 5 | 6 | 2 | 5 | 5 | 6 | 5 | 6 | 7 | 7 | 2 | 2 | 4 | 1 | 2 | 6 | 6 | 1 | 2 | 1 | 2 | 1  | 5 | 4 | 3 | 4 | 3 |   |   |   |   |
| AST | 4 | 4 | 2 | 3 | 5 | 5 | 1 | 2 | 6 | 7 | 1 | 2 | 4 | 1 | 3 | 7 | 5 | 1 | 2 | 1 | 2 | 2  | 1 | 5 | 4 | 1 | 4 | 1 |   |   |   |
| AST | 6 | 5 | 1 | 6 | 2 | 4 | 1 | 5 | 6 | 7 | 1 | 1 | 4 | 1 | 1 | 6 | 2 | 1 | 2 | 1 | 6 | RP | 2 | 3 | 1 | 2 | 4 | 2 | 4 | 2 |   |
| AST | 4 | 4 | 3 | 5 | 4 | 5 | 3 | 5 | 5 | 6 | 2 | 3 | 3 | 1 | 1 | 5 | 7 | 1 | 2 | 1 | 5 | 2  | 1 | 3 | 1 | 5 | 4 | 2 | 4 | 2 |   |
| AST | 5 | 4 | 3 | 5 | 6 | 5 | 4 | 5 | 7 | 7 | 2 | 2 | 5 | 1 | 2 | 4 | 6 | 1 | 3 | 1 | 1 | 1  | 1 | 5 | 4 | 1 | 4 | 1 |   |   |   |
| AST | 3 | 4 | 2 | 5 | 4 | 5 | 3 | 5 | 7 | 7 | 1 | 1 | 4 | 1 | 4 | 4 | 7 | 1 | 1 | 1 | 2 | 2  | 2 | 2 | 6 | 4 | 3 | 4 | 3 |   |   |
| AST | 7 | 3 | 6 | 6 | 3 | 4 | 6 | 6 | 7 | 7 | 3 | 3 | 3 | 3 | 4 | 6 | 6 | 1 | 1 | 1 | 2 | 1  | 1 | 2 | 5 | 8 | 2 | 8 | 2 |   |   |
| AST | 5 | 6 | 4 | 6 | 2 | 7 | 4 | 1 | 4 | 4 | 4 | 4 | 4 | 1 | 4 | 1 | 7 | 1 | 2 | 1 | 2 | 2  | 1 | 2 | 5 | 4 | 5 | 4 |   |   |   |
| AST | 4 | 6 | 2 | 3 | 7 | 7 | 1 | 1 | 7 | 2 | 5 | 4 | 7 | 5 | 2 | 1 | 7 | 1 | 1 | 1 | 5 | 2  | 2 | 2 | 1 | 2 | 3 | 2 | 3 | 2 |   |
| AST | 5 | 4 | 4 | 6 |   |   |   |   | 7 | 7 | 4 | 4 | 5 | 2 |   | 7 | 2 | 1 | 1 | 1 | 3 | DK | 1 | 3 | 1 | 5 | 5 | 1 | 5 | 1 |   |
| AST | 6 | 6 | 2 | 2 | 6 | 6 | 2 | 2 | 7 | 7 | 1 | 1 | 4 | 1 | 1 | 5 | 5 | 1 | 1 | 1 | 3 | 3  | 1 | 5 | 1 | 5 | 6 | 2 | 6 | 2 |   |
| AST | 5 | 5 | 5 | 5 | 6 | 6 | 2 | 3 | 5 | 5 | 3 | 4 | 4 | 1 | 4 | 7 | 2 | 1 | 1 | 2 | 2 | 2  | 1 | 5 | 4 | 3 | 4 | 3 |   |   |   |
| AST | 2 | 4 | 2 | 6 | 2 | 3 | 2 | 6 | 7 | 7 | 2 | 3 | 4 | 2 | 2 | 2 | 5 | 1 | 1 | 1 | 1 | 1  | 1 | 1 | 5 | 4 | 4 | 4 | 4 |   |   |
| AST | 5 | 2 | 7 | 6 | 4 | 3 | 5 | 7 | 7 | 7 | 2 | 2 | 4 | 1 | 2 | 5 | 5 | 1 | 2 | 1 | 6 | AD | 1 | 2 | 1 | 5 | 4 | 1 | 4 | 1 |   |
| AST | 5 | 3 | 2 | 4 | 5 | 5 | 2 | 3 | 5 | 5 | 2 | 3 | 4 | 2 | 3 | 5 | 3 | 1 | 1 | 1 | 4 | 3  | 1 | 2 | 1 | 5 | 4 | 2 | 4 | 2 |   |
| AST | 3 | 1 | 6 | 6 | 3 | 2 | 5 | 7 | 6 | 7 | 2 | 3 | 4 | 1 | 1 | 6 | 4 | 1 | 2 | 1 | 1 | 1  | 1 | 1 | 5 | 5 | 3 | 5 | 3 |   |   |
| AST | 6 | 6 | 2 | 5 | 6 | 6 | 3 | 6 | 6 | 7 | 2 | 3 | 4 | 1 | 3 | 6 | 4 | 1 | 1 | 1 | 1 | 1  | 2 | 1 | 5 | 3 | 2 | 3 | 2 |   |   |
| AST | 3 | 4 | 2 | 4 | 4 | 4 | 3 | 6 | 7 | 7 | 2 | 2 | 4 | 4 | 1 | 1 | 7 | 1 | 1 | 1 | 1 | 1  | 1 | 1 | 5 | 4 | 1 | 4 | 1 |   |   |
| AST | 4 | 5 | 3 | 4 | 4 | 5 | 3 | 3 | 6 | 5 | 2 | 2 | 3 | 1 | 1 | 4 | 5 | 1 | 1 | 1 | 5 | 3  | 1 | 4 | 1 | 5 | 5 | 3 | 5 | 3 |   |
| AST | 5 | 5 | 4 | 6 | 6 | 5 | 6 | 6 | 6 | 6 | 1 | 1 | 6 | 1 | 4 | 6 | 6 | 1 | 1 | 1 | 3 | 3  | 1 | 3 | 1 | 5 | 3 | 3 | 3 | 3 |   |
| AST | 2 | 2 | 6 | 7 | 5 | 5 | 3 | 3 | 7 | 7 | 1 | 1 | 4 | 1 | 2 | 7 | 3 | 1 | 1 | 1 | 2 | 1  | 2 | 1 | 5 | 5 | 2 | 5 | 2 |   |   |
| AST | 5 | 5 | 3 | 7 | 6 | 6 | 2 | 4 | 6 | 6 | 3 | 4 | 4 | 2 | 6 | 5 | 5 | 1 | 1 | 1 | 2 | 2  | 1 | 1 | 5 | 5 | 1 | 5 | 1 |   |   |

|     |   |   |   |   |   |   |   |   |   |   |   |   |   |   |   |   |   |   |   |   |   |    |   |   |   |   |   |   |   |    |    |
|-----|---|---|---|---|---|---|---|---|---|---|---|---|---|---|---|---|---|---|---|---|---|----|---|---|---|---|---|---|---|----|----|
| AST | 2 | 2 | 5 | 5 | 4 | 4 | 4 | 4 | 7 | 5 | 4 | 4 | 3 | 1 | 1 | 6 | 5 | 1 | 1 | 1 | 3 | 2  | 2 | 2 | 1 | 5 | 5 | 1 | 5 | 1  |    |
| AST | 5 | 5 | 2 | 2 | 6 | 5 | 2 | 2 | 4 | 6 | 4 | 6 | 4 | 1 | 2 | 5 | 5 | 1 | 2 | 1 | 1 |    | 2 | 1 | 1 | 5 | 4 | 2 | 4 | 2  |    |
| AST | 4 | 3 | 5 | 6 | 5 | 5 | 3 | 4 | 6 | 6 | 1 | 3 | 4 | 1 | 4 | 7 | 4 | 1 | 1 | 1 | 1 |    | 1 | 2 | 1 | 5 | 5 | 1 | 5 | 1  |    |
| AST | 5 | 6 | 1 | 5 | 5 | 5 | 4 | 2 | 7 | 7 | 1 | 1 | 5 | 1 | 1 | 1 | 7 | 1 | 1 | 1 | 2 |    | 1 | 2 | 1 | 2 | 5 | 3 | 5 | 3  |    |
| AST | 5 | 3 | 2 | 5 | 5 | 6 | 5 | 6 | 5 | 7 | 3 | 2 | 5 | 3 | 2 | 2 | 6 | 1 | 2 | 1 | 1 |    | 1 | 1 | 1 | 5 | 5 | 1 | 5 | 1  |    |
| AST | 6 | 4 | 4 | 3 | 2 | 4 | 6 | 6 | 5 | 7 | 1 | 1 | 3 | 1 | 2 | 5 | 4 | 1 | 1 | 1 | 2 |    | 1 | 2 | 1 | 5 | 4 | 1 | 4 | 1  |    |
| BCH | 6 | 5 | 5 | 6 | 5 | 5 | 2 | 6 | 7 | 7 | 1 | 1 | 6 | 1 | 1 | 1 | 4 | 1 | 1 | 2 | 5 | 2  | 1 | 4 | 1 | 5 | 6 | 2 | 6 | 2  |    |
| BCH | 6 | 6 | 1 | 1 | 6 | 6 | 1 | 1 | 7 | 7 | 1 | 1 | 4 | 1 | 1 | 5 | 6 | 1 | 1 | 2 | 5 | 4  | 1 | 4 | 1 | 5 | 5 | 2 | 5 | 2  |    |
| BCH | 5 | 4 | 4 | 6 | 3 | 4 | 3 | 6 | 6 | 6 | 4 | 4 | 1 | 2 | 4 | 7 | 3 | 1 | 2 | 2 | 1 |    | 1 | 1 | 1 | 5 | 6 | 7 | 6 | 7  |    |
| BCH | 2 | 4 | 1 | 3 | 2 | 2 | 7 | 7 | 6 | 7 | 3 | 3 | 3 | 1 | 5 | 3 | 4 | 1 | 1 | 2 | 1 |    | 2 | 1 | 1 | 5 | 4 | 1 | 4 | 1  |    |
| BCH | 1 | 1 | 5 | 3 | 1 | 1 | 7 | 6 | 5 | 7 | 3 | 4 | 6 | 1 | 1 | 1 | 7 | 1 | 2 | 2 | 4 | 3  | 1 | 3 | 1 | 6 | 5 | 3 | 5 | 3  |    |
| BCH | 5 | 5 | 4 | 4 | 5 | 4 | 5 | 5 | 5 | 7 | 1 | 1 | 4 | 1 | 6 | 7 | 2 | 1 | 1 | 2 | 1 |    | 2 | 2 | 1 | 5 | 5 | 2 | 5 | 2  |    |
| BCH | 3 | 3 | 4 | 4 | 4 | 3 | 2 | 4 | 5 | 6 | 2 | 2 | 6 | 3 | 2 | 2 | 5 | 1 | 2 | 2 | 6 | EM |   | 1 | 6 | 1 | 5 | 5 | 2 | EM | EM |
| BCH | 6 | 6 | 2 | 6 | 7 | 5 | 2 | 5 | 7 | 7 | 1 | 1 | 5 | 1 | 1 | 1 | 7 | 1 | 1 | 2 | 2 |    | 1 | 2 | 1 | 2 | 6 | 1 | 6 | 1  |    |
| BCH | 5 | 3 | 6 | 7 | 6 | 5 | 5 | 5 | 5 | 7 | 2 | 5 | 4 | 1 | 1 | 1 | 7 | 1 | 1 | 2 | 1 |    | 1 | 1 | 1 | 5 | 6 | 1 | 6 | 1  |    |
| BCH | 5 | 7 | 1 | 2 | 5 | 5 | 3 | 3 | 6 | 7 | 6 | 5 | 3 | 1 | 1 | 6 | 7 | 1 | 1 | 2 | 2 |    | 1 | 2 | 1 | 2 | 6 | 8 | 6 | 8  |    |
| BCH | 3 | 3 | 5 | 6 | 5 | 3 | 3 | 6 | 6 | 6 | 2 | 3 | 3 | 1 | 1 | 2 | 5 | 1 | 2 | 2 | 1 |    | 1 | 1 | 1 | 5 | 5 | 2 | 5 | 2  |    |
| BCH | 5 | 5 | 5 | 6 | 3 | 5 | 5 | 4 | 6 | 6 | 6 | 5 | 3 | 1 | 1 | 1 | 7 | 1 | 1 | 2 | 1 |    | 1 | 1 | 1 | 2 | 5 | 1 | 5 | 1  |    |
| BCH | 5 | 4 | 2 | 4 | 3 | 3 | 3 | 4 | 6 | 6 | 1 | 1 | 5 | 1 | 4 | 1 | 6 | 1 | 1 | 2 | 1 |    | 1 | 1 | 1 | 5 | 5 | 2 | 5 | 2  |    |
| BCH | 6 | 6 | 2 | 2 | 6 | 6 | 2 | 2 | 6 | 6 | 2 | 2 | 6 | 2 | 2 | 2 | 6 | 1 | 2 | 1 | 5 | 3  | 1 | 4 | 1 | 5 | 4 | 2 | 4 | 2  |    |
| BCH | 3 | 5 | 5 | 5 | 2 | 4 | 4 | 6 | 5 | 5 | 4 | 3 | 3 | 2 | 6 | 5 | 2 | 1 | 2 | 1 | 1 |    | 2 | 2 | 1 | 5 | 5 | 1 | 5 | 1  |    |
| BCH | 5 | 5 | 4 | 5 | 5 | 5 | 5 | 5 | 6 | 6 | 4 | 4 | 6 | 1 | 1 | 4 | 6 | 1 | 1 | 1 | 5 | 3  | 1 | 6 | 1 | 5 | 4 | 3 | 4 | 3  |    |
| BCH | 1 | 1 | 4 | 5 | 5 | 4 | 3 | 2 | 6 | 7 | 5 | 5 | 5 | 1 | 1 | 7 | 6 | 1 | 3 | 1 | 5 | 3  | 1 | 6 | 1 | 5 | 6 | 3 | 6 | 3  |    |
| BCH | 6 | 5 | 1 | 6 | 6 | 6 | 1 | 6 | 7 | 7 | 2 | 2 | 5 | 1 | 4 | 5 | 7 | 1 | 1 | 1 | 5 | 4  | 1 | 5 | 1 | 5 | 5 | 1 | 5 | 1  |    |
| BCH | 1 | 7 | 3 | 3 | 1 | 1 | 1 | 3 | 7 | 6 | 5 | 4 | 3 | 1 | 1 | 7 | 4 | 1 | 3 | 1 | 5 | 3  | 1 | 6 | 1 | 5 | 5 | 2 | 5 | 2  |    |
| BCH | 6 | 5 | 5 | 5 | 4 | 5 | 5 | 7 | 5 | 6 | 1 | 1 | 6 | 1 | 1 | 3 | 7 | 1 | 2 | 1 | 1 |    | 1 | 1 | 1 | 5 | 5 | 1 | 5 | 1  |    |
| BCH | 7 | 6 | 7 | 4 | 1 | 6 | 4 | 3 | 7 | 7 | 7 | 7 | 4 | 2 | 1 | 7 | 7 | 1 | 2 | 2 | 2 |    | 1 | 2 | 1 | 2 | 6 | 8 | 6 | 8  |    |
| BCH | 7 | 7 | 7 | 7 | 7 | 7 | 7 | 7 | 7 | 7 | 7 | 7 | 6 | 7 | 1 | 7 | 7 | 1 | 3 | 2 | 2 |    | 1 | 2 | 1 | 3 | 5 | 2 | 5 | 2  |    |
| BCH | 4 | 5 | 5 | 5 |   |   |   |   | 6 | 6 | 2 | 1 | 3 | 6 | 6 | 6 | 2 | 1 | 1 | 2 | 1 |    | 2 | 1 | 1 | 5 | 4 | 1 | 4 | 1  |    |
| BCH | 6 | 3 | 5 | 5 | 5 | 5 | 2 | 5 | 6 | 5 | 2 | 1 | 3 | 1 | 4 | 5 | 5 | 2 | 2 | 2 | 2 |    | 1 | 2 | 1 | 5 | 7 | 1 | 7 | 1  |    |
| BCH | 5 | 4 | 2 | 2 | 3 | 4 | 4 | 5 | 6 | 6 | 3 | 3 | 3 | 2 | 5 | 3 | 5 | 1 | 1 | 1 | 2 |    | 1 | 2 | 1 | 5 | 6 | 1 | 6 | 1  |    |
| BCH | 6 | 6 | 2 | 1 | 5 | 6 | 3 | 3 | 6 | 5 | 2 | 2 | 5 | 2 | 4 | 3 | 7 | 1 | 1 | 1 | 1 |    | 2 | 1 | 1 | 7 | 6 | 2 | 6 | 2  |    |

|     |   |   |   |   |   |   |   |   |   |   |   |   |   |   |   |   |   |   |    |   |   |    |   |   |   |   |   |   |    |    |   |   |
|-----|---|---|---|---|---|---|---|---|---|---|---|---|---|---|---|---|---|---|----|---|---|----|---|---|---|---|---|---|----|----|---|---|
| BCH | 1 | 1 | 1 | 3 | 3 | 1 | 2 | 7 | 7 | 7 | 1 | 1 | 6 | 7 | 4 | 2 | 7 | 1 | 2  | 1 | 1 | 2  | 1 | 1 | 5 | 5 | 2 | 5 | 2  |    |   |   |
| BCH | 4 | 5 | 5 | 6 | 3 | 4 | 2 | 3 | 7 | 7 | 3 | 3 | 6 | 1 | 1 | 7 | 5 | 1 | 2  | 1 | 2 | 1  | 2 | 1 | 5 | 6 | 2 | 6 | 2  |    |   |   |
| BCH | 7 | 7 | 1 | 1 | 7 | 7 | 1 | 2 | 7 | 7 | 4 | 1 | 1 | 7 | 7 | 7 | 4 | 1 | DK | 1 | 6 | EM | 1 | 6 | 1 | 5 | 6 | 1 | EM | EM |   |   |
| CHE | 6 | 5 | 4 | 6 | 7 | 6 | 3 | 3 | 7 | 7 | 6 | 6 | 6 | 2 | 6 | 6 | 3 | 1 | 1  | 1 | 5 | 4  | 1 | 5 | 1 | 5 | 5 | 3 | 5  | 3  |   |   |
| CHE | 6 | 7 | 2 | 2 | 6 | 6 | 3 | 3 | 4 | 7 | 1 | 2 | 4 | 1 | 5 | 6 | 1 | 1 | 3  | 2 | 1 | 2  | 1 | 1 | 5 | 7 | 2 | 7 | 2  |    |   |   |
| CHE | 5 | 4 | 5 | 4 | 5 | 5 | 6 | 6 | 7 | 7 | 4 | 5 | 5 | 5 | 1 | 5 | 7 | 1 | 1  | 2 | 1 | 2  | 1 | 1 | 2 | 6 | 1 | 6 | 1  |    |   |   |
| CHE | 4 | 4 | 4 | 6 | 5 | 5 | 3 | 5 | 6 | 6 | 3 | 2 | 3 | 1 | 4 | 6 | 3 | 1 | 1  | 1 | 5 | 5  | 1 | 6 | 1 | 5 | 6 | 2 | 6  | 2  |   |   |
| CHE | 1 | 3 | 3 | 3 | 3 | 3 | 1 | 3 | 7 | 6 | 1 | 1 | 5 | 2 | 2 | 2 | 5 | 1 | 1  | 2 | 1 | 2  | 1 | 1 | 5 | 6 | 1 | 6 | 1  |    |   |   |
| CHE | 3 | 3 | 5 | 5 | 6 | 5 | 4 | 4 | 7 | 7 | 2 | 2 | 5 | 1 | 6 | 7 | 2 | 1 | 1  | 2 | 1 | 1  | 1 | 5 | 6 | 1 | 6 | 1 |    |    |   |   |
| CHE | 5 | 2 | 5 | 3 | 5 | 2 | 6 | 6 | 7 | 7 | 2 | 3 | 4 | 2 | 3 | 2 | 6 | 1 | 1  | 2 | 1 | 1  | 1 | 5 | 5 | 1 | 5 | 1 |    |    |   |   |
| CHE | 2 | 3 | 5 | 6 | 4 | 4 | 4 | 4 | 7 | 7 | 2 | 2 | 4 | 1 | 4 | 4 | 5 | 2 | DK | 1 | 3 | DK | 2 | 2 | 1 | 5 | 3 | 4 | 3  | 4  |   |   |
| CHE | 5 | 4 | 2 | 5 | 6 | 5 | 2 | 5 | 6 | 7 | 3 | 3 | 4 | 1 | 1 | 1 | 4 | 1 | 1  | 2 | 5 | 2  | 1 | 3 | 1 | 5 | 5 | 2 | 5  | 2  |   |   |
| CHE | 5 | 6 | 3 | 3 | 5 | 6 | 2 | 3 | 7 | 7 | 5 | 3 | 4 | 1 | 3 | 6 | 3 | 1 | 1  | 1 | 5 | 2  | 2 | 4 | 1 | 5 | 6 | 2 | 6  | 2  |   |   |
| CHE | 2 | 5 | 6 | 6 | 4 | 5 | 4 | 3 | 7 | 7 | 2 | 2 | 5 | 1 | 5 | 6 | 5 | 1 | 2  | 2 | 1 | 2  | 2 | 1 | 3 | 5 | 2 | 5 | 2  |    |   |   |
| CHE | 4 | 4 | 5 | 6 | 4 | 4 | 4 | 6 | 7 | 7 | 2 | 2 | 4 | 2 | 3 | 6 | 3 | 1 | 1  | 2 | 5 | 8  | 1 | 4 | 1 | 5 | 5 | 2 | 5  | 2  |   |   |
| CHE | 5 | 5 | 3 | 3 | 5 | 5 | 3 | 4 | 4 | 6 | 2 | 3 | 4 | 2 | 2 | 6 | 4 | 1 | 2  | 2 | 5 | 4  | 1 | 2 | 1 | 5 | 5 | 1 | 5  | 1  |   |   |
| CHE | 7 | 1 | 7 | 7 | 7 | 1 | 7 | 7 | 6 | 6 | 6 | 6 | 3 | 1 | 1 | 5 | 7 | 1 | 2  | 2 | 2 | 1  | 1 | 1 | 2 | 6 | 7 | 6 | 7  |    |   |   |
| CHE | 2 | 2 | 5 | 6 | 5 | 6 | 6 | 6 | 1 | 4 | 1 | 1 | 3 | 1 | 5 | 5 | 4 | 1 | 3  | 2 | 1 | 2  | 2 | 1 | 5 | 6 | 2 | 6 | 2  |    |   |   |
| CHE | 5 | 3 | 7 | 6 | 3 | 3 | 6 | 6 | 6 | 6 | 2 | 2 | 5 | 4 | 5 | 6 | 5 | 1 | 1  | 2 | 1 | 1  | 1 | 5 | 4 | 1 | 4 | 1 |    |    |   |   |
| CHE | 6 | 7 | 6 | 6 | 7 | 7 | 6 | 6 | 7 | 7 | 4 | 4 | 4 | 1 | 1 | 1 | 7 | 1 | 1  | 2 | 2 | 1  | 2 | 1 | 6 | 6 | 1 | 6 | 1  |    |   |   |
| CHE | 4 | 5 | 3 | 5 | 6 | 6 | 1 | 6 | 4 | 6 | 1 | 2 | 5 | 1 | 6 | 5 | 4 | 1 | 1  | 2 | 1 | 2  | 1 | 5 | 5 | 1 | 5 | 1 |    |    |   |   |
| CHE | 6 | 6 | 3 | 2 | 6 | 6 | 2 | 3 | 6 | 6 | 2 | 2 | 6 | 6 | 6 | 6 | 2 | 1 | 2  | 2 | 6 | DE | 2 | 2 | 1 | 5 | 5 | 2 | 5  | 2  |   |   |
| CHE | 3 | 5 | 4 | 5 | 5 | 4 | 3 | 6 | 7 | 7 | 2 | 2 | 4 | 3 | 7 | 7 | 4 | 1 | 1  | 1 | 1 | 2  | 1 | 1 | 5 | 7 | 1 | 7 | 1  |    |   |   |
| CHE | 4 | 4 | 6 | 7 | 4 | 4 | 6 | 7 | 7 | 7 | 4 | 6 | 2 | 1 | 1 | 4 | 4 | 1 | 1  | 1 | 2 | 1  | 2 | 1 | 2 | 7 | 3 | 7 | 3  |    |   |   |
| CHE | 1 | 2 | 7 | 7 | 3 | 6 | 4 | 3 | 5 | 6 | 2 | 3 | 4 | 1 | 2 | 3 | 6 | 1 | 1  | 1 | 1 | 1  | 1 | 1 | 6 | 8 | 2 | 8 | 2  |    |   |   |
| CHE | 5 | 4 | 3 | 2 | 4 | 4 | 4 | 4 | 6 | 6 | 2 | 2 | 5 | 2 | 5 | 6 | 5 | 1 | 1  | 1 | 1 | 2  | 1 | 1 | 5 | 6 | 1 | 6 | 1  |    |   |   |
| CHE | 7 | 6 | 3 | 2 | 2 | 2 | 5 | 5 | 7 | 7 | 1 | 1 | 6 | 1 | 2 | 6 | 7 | 1 | 1  | 1 | 1 | 1  | 1 | 1 | 5 | 5 | 1 | 5 | 1  |    |   |   |
| CHE | 5 | 6 | 4 | 5 | 6 | 6 | 3 | 4 | 7 | 7 | 3 | 3 | 4 | 1 | 1 | 5 | 3 | 1 | 1  | 1 | 1 | 1  | 1 | 1 | 5 | 5 | 2 | 5 | 2  |    |   |   |
| CHE | 6 | 4 | 3 | 5 | 3 | 4 | 5 | 5 | 7 | 7 | 5 | 5 | 5 | 4 | 4 | 2 | 7 | 1 | 1  | 1 | 1 | 1  | 1 | 1 | 2 | 6 | 6 | 6 | 6  |    |   |   |
| CHE | 3 | 5 | 7 | 7 | 6 | 5 | 6 | 7 | 5 | 7 | 1 | 3 | 5 | 1 | 6 | 7 | 6 | 1 | DK | 1 | 1 | 2  | 1 | 1 | 5 | 6 | 1 | 6 | 1  |    |   |   |
| CHE | 5 | 3 | 1 | 3 | 6 | 5 | 3 | 4 | 6 | 6 | 3 | 4 | 6 | 1 | 2 | 1 | 7 | 1 | 1  | 1 | 1 | 1  | 1 | 1 | 5 | 6 | 1 | 6 | 1  |    |   |   |
| CHE | 6 | 4 | 4 | 5 |   |   |   |   |   |   | 5 | 5 | 1 | 1 | 4 | 1 | 5 | 5 | 4  | 1 | 1 | 2  | 5 | 4 | 1 | 2 | 1 | 5 | 4  | 2  | 4 | 2 |



|     |   |   |   |   |   |   |   |   |   |   |   |   |   |   |   |   |   |   |   |   |   |    |   |   |   |   |   |   |   |   |
|-----|---|---|---|---|---|---|---|---|---|---|---|---|---|---|---|---|---|---|---|---|---|----|---|---|---|---|---|---|---|---|
| CHE | 5 | 5 | 2 | 3 | 5 | 5 | 2 | 3 | 7 | 7 | 3 | 2 | 5 | 1 | 2 | 2 | 6 | 1 | 1 | 1 | 2 | 1  | 2 | 1 | 5 | 4 | 1 | 4 | 1 |   |
| CHE | 5 | 4 | 2 | 6 | 5 | 4 | 2 | 5 | 4 | 7 | 3 | 3 | 6 | 1 | 1 | 4 | 6 | 1 | 2 | 1 | 1 | 2  | 1 | 1 | 7 | 6 | 1 | 6 | 1 |   |
| CHE | 4 | 4 | 5 | 5 | 3 | 3 | 5 | 5 | 7 | 7 | 2 | 2 | 5 | 2 | 2 | 5 | 5 | 1 | 2 | 1 | 1 | 2  | 1 | 1 | 5 | 7 | 1 | 7 | 1 |   |
| CHE | 7 | 4 | 7 | 7 | 4 | 4 | 7 | 7 | 3 | 7 | 5 | 6 | 2 | 1 | 7 | 7 | 7 | 1 | 1 | 1 | 2 | 1  | 1 | 1 | 2 | 7 | 1 | 7 | 1 |   |
| CHE | 4 | 5 | 3 | 5 | 4 | 5 | 2 | 4 | 5 | 7 | 2 | 3 | 4 | 3 | 5 | 5 | 4 | 1 | 2 | 1 | 1 | 2  | 1 | 1 | 5 | 8 | 1 | 8 | 1 |   |
| CHE | 3 | 6 | 1 | 6 | 3 | 6 | 1 | 6 | 7 | 7 | 2 | 2 | 4 | 1 | 2 | 5 | 5 | 1 | 1 | 2 | 1 | 1  | 1 | 1 | 5 | 8 | 8 | 8 | 8 |   |
| CHE | 7 | 5 | 5 | 6 | 5 | 5 | 3 | 5 | 7 | 7 | 1 | 2 | 5 | 7 | 2 | 7 | 5 | 1 | 1 | 1 | 1 | 1  | 1 | 2 | 1 | 1 | 1 | 6 | 1 |   |
| CHE | 2 | 3 | 5 | 5 | 2 | 2 | 6 | 6 | 7 | 7 | 3 | 4 | 5 | 1 | 2 | 6 | 5 | 1 | 2 | 1 | 3 | DK | 2 | 2 | 1 | 5 | 4 | 2 | 4 | 2 |
| CHE | 4 | 4 | 4 | 4 | 6 | 5 | 4 | 6 | 7 | 7 | 1 | 2 | 6 | 1 | 3 | 4 | 4 | 1 | 2 | 1 | 1 | 1  | 1 | 2 | 1 | 1 | 6 | 1 |   |   |
| CHE | 6 | 6 | 3 | 3 | 6 | 6 | 5 | 4 | 7 | 6 | 2 | 2 | 5 | 1 | 4 | 6 | 4 | 1 | 1 | 2 | 1 | 1  | 1 | 2 | 1 | 1 | 6 | 1 |   |   |
| CHE | 7 | 3 | 2 | 5 | 7 | 6 | 1 | 4 | 6 | 7 | 2 | 2 | 3 | 3 | 5 | 7 | 2 | 1 | 2 | 2 | 1 | 1  | 1 | 1 | 5 | 5 | 1 | 5 | 1 |   |
| CHE | 6 | 5 | 2 | 3 | 5 | 6 | 3 | 2 | 7 | 7 | 4 | 4 | 5 | 1 | 5 | 7 | 6 | 1 | 2 | 2 | 4 | 3  | 2 | 2 | 5 | 8 | 2 | 8 | 2 |   |
| CHE | 2 | 2 | 6 | 2 | 5 | 5 | 4 | 4 | 7 | 7 | 1 | 1 | 6 | 1 | 1 | 3 | 5 | 1 | 3 | 2 | 1 | 1  | 1 | 1 | 5 | 6 | 1 | 6 | 1 |   |
| CHE | 5 | 4 | 7 | 7 | 5 | 4 | 6 | 6 | 7 | 7 | 1 | 2 | 5 | 6 | 5 | 6 | 5 | 1 | 4 | 2 | 1 | 1  | 1 | 2 | 7 | 1 | 7 | 1 |   |   |
| CHE | 2 | 2 | 2 | 2 | 3 | 3 | 5 | 5 | 5 | 5 | 2 | 2 | 4 | 1 | 1 | 4 | 5 | 1 | 2 | 2 | 1 | 1  | 1 | 1 | 7 | 7 | 1 | 7 | 1 |   |
| CHE | 4 | 6 | 2 | 3 | 4 | 4 | 3 | 4 | 7 | 7 | 1 | 3 | 4 | 1 | 2 | 7 | 2 | 1 | 3 | 2 | 1 | 1  | 1 | 5 | 7 | 1 | 7 | 1 |   |   |
| CHE | 3 | 3 | 3 | 3 | 3 | 3 | 3 | 3 | 5 | 5 | 5 | 5 | 5 | 4 | 4 | 4 | 4 | 1 | 2 | 2 | 2 | 2  | 2 | 2 | 7 | 1 | 7 | 1 |   |   |
| CHE | 3 | 4 | 6 | 4 | 6 | 5 | 4 | 4 | 6 | 6 | 4 | 4 | 7 | 2 | 5 | 7 | 4 | 1 | 1 | 1 | 1 | 1  | 1 | 5 | 5 | 1 | 5 | 1 |   |   |
| CHE | 4 | 4 | 5 | 5 | 6 | 6 | 2 | 4 | 7 | 7 | 2 | 2 | 4 | 1 | 7 | 6 | 5 | 1 | 1 | 1 | 1 | 1  | 1 | 5 | 5 | 2 | 5 | 2 |   |   |
| CHE | 3 | 4 | 5 | 4 | 5 | 5 | 3 | 6 | 6 | 5 | 2 | 2 | 3 | 5 | 6 | 5 | 6 | 1 | 1 | 1 | 1 | 1  | 1 | 7 | 4 | 2 | 4 | 2 |   |   |
| CHE | 5 | 3 | 4 | 5 | 5 | 4 | 5 | 6 | 6 | 6 | 4 | 4 | 3 | 3 | 5 | 5 | 5 | 1 | 1 | 1 | 1 | 1  | 1 | 6 | 6 | 1 | 6 | 1 |   |   |
| CHE | 1 | 2 | 6 | 5 | 3 | 3 | 5 | 4 | 4 | 7 | 1 | 1 | 4 | 5 | 7 | 7 | 1 | 1 | 1 | 1 | 1 | 1  | 1 | 5 | 7 | 4 | 7 | 4 |   |   |
| CHE | 3 | 3 | 5 | 5 | 3 | 3 | 5 | 5 | 6 | 6 | 3 | 4 | 3 | 1 | 2 | 3 | 5 | 1 | 1 | 1 | 1 | 1  | 1 | 5 | 4 | 2 | 4 | 2 |   |   |
| CHE | 6 | 5 | 4 | 5 | 5 | 4 | 5 | 5 | 7 | 7 | 1 | 1 | 3 | 2 | 4 | 5 | 4 | 1 | 1 | 1 | 1 | 1  | 1 | 5 | 6 | 5 | 6 | 5 |   |   |
| CHE | 3 | 4 | 5 | 5 | 5 | 5 | 4 | 4 | 7 | 7 | 2 | 1 | 5 | 2 | 4 | 5 | 5 | 1 | 1 | 1 | 1 | 1  | 1 | 5 | 5 | 2 | 5 | 2 |   |   |
| CHE | 5 | 5 | 4 | 4 | 6 | 6 | 4 | 5 | 6 | 7 | 1 | 5 | 4 | 2 | 5 | 6 | 6 | 1 | 1 | 1 | 1 | 1  | 1 | 5 | 3 | 2 | 3 | 2 |   |   |
| CHE | 4 | 3 | 4 | 6 | 4 | 3 | 5 | 4 | 6 | 6 | 2 | 2 | 4 | 3 | 4 | 6 | 2 | 1 | 1 | 1 | 1 | 1  | 1 | 2 | 8 | 2 | 8 | 2 |   |   |
| CHE | 3 | 5 | 3 | 5 | 6 | 6 | 2 | 3 | 7 | 7 | 2 | 2 | 4 | 1 | 3 | 2 | 5 | 1 | 1 | 1 | 1 | 1  | 1 | 5 | 5 | 4 | 5 | 4 |   |   |
| CHE | 3 | 3 | 4 | 3 | 6 | 6 | 4 | 4 | 6 | 6 | 6 | 6 | 4 | 1 | 4 | 6 | 3 | 1 | 1 | 1 | 1 | 1  | 1 | 5 | 7 | 2 | 7 | 2 |   |   |
| CHE | 3 | 3 | 5 | 6 | 4 | 4 | 4 | 4 | 7 | 7 | 2 | 4 | 5 | 1 | 2 | 7 | 4 | 1 | 1 | 1 | 1 | 1  | 1 | 5 | 7 | 2 | 7 | 2 |   |   |
| CHE | 5 | 7 | 3 | 5 | 6 | 5 | 4 | 6 | 6 | 7 | 2 | 3 | 4 | 2 | 3 | 7 | 3 | 1 | 1 | 1 | 1 | 1  | 1 | 5 | 7 | 1 | 7 | 1 |   |   |
| CHE | 6 | 7 | 5 | 3 | 6 | 6 | 4 | 5 | 6 | 6 | 2 | 3 | 6 | 6 | 5 | 7 | 4 | 1 | 1 | 1 | 1 | 1  | 1 | 2 | 6 | 2 | 6 | 2 |   |   |

|     |   |   |   |   |   |   |   |   |   |   |   |   |   |   |   |   |   |   |   |   |   |   |   |   |   |   |    |   |   |   |   |   |   |   |   |   |
|-----|---|---|---|---|---|---|---|---|---|---|---|---|---|---|---|---|---|---|---|---|---|---|---|---|---|---|----|---|---|---|---|---|---|---|---|---|
| CHE | 5 | 4 | 5 | 5 | 3 | 4 | 6 | 2 | 5 | 6 | 2 | 2 | 5 | 1 | 1 | 1 | 7 | 1 | 1 | 1 | 1 | 1 | 1 | 1 | 1 | 5 | 5  | 3 | 5 | 3 |   |   |   |   |   |   |
| CHE | 4 | 6 | 2 | 4 | 5 | 4 | 2 | 4 | 7 | 7 | 5 | 6 | 4 | 3 | 4 | 1 | 2 | 1 | 1 | 1 | 1 | 1 | 1 | 1 | 1 | 1 | 5  | 5 | 1 | 5 | 1 |   |   |   |   |   |
| CHE | 5 | 4 | 2 | 3 | 2 | 2 | 4 | 5 | 7 | 7 | 3 | 3 | 4 | 1 | 2 | 2 | 7 | 1 | 1 | 1 | 1 | 1 | 1 | 1 | 1 | 2 | 1  | 1 | 3 | 4 | 2 | 4 | 2 |   |   |   |
| CHE | 4 | 4 | 3 | 5 | 6 | 6 | 2 | 3 | 6 | 7 | 1 | 2 | 5 | 2 | 5 | 6 | 3 | 1 | 1 | 1 | 1 | 1 | 1 | 1 | 1 | 1 | 1  | 1 | 5 | 8 | 1 | 8 | 1 |   |   |   |
| CHE | 5 | 5 | 4 | 7 | 5 | 5 | 2 | 7 | 7 | 6 | 3 | 3 | 5 | 1 | 6 | 7 | 1 | 1 | 1 | 1 | 1 | 1 | 1 | 1 | 1 | 2 | 1  | 1 | 5 | 6 | 1 | 6 | 1 |   |   |   |
| CHE | 1 | 5 | 5 | 7 | 2 | 5 | 2 | 6 | 6 | 7 | 2 | 1 | 5 | 1 | 3 | 5 | 6 | 1 | 1 | 1 | 1 | 1 | 1 | 1 | 1 | 2 | 1  | 2 | 5 | 7 | 1 | 7 | 1 |   |   |   |
| CHE | 5 | 5 | 3 | 5 | 3 | 5 | 4 | 5 | 6 | 6 | 2 | 3 | 4 | 1 | 3 | 6 | 6 | 1 | 1 | 1 | 1 | 1 | 1 | 1 | 1 | 1 | 1  | 1 | 5 | 5 | 1 | 5 | 1 |   |   |   |
| CHE | 5 | 3 | 6 | 7 | 5 | 6 | 3 | 7 | 6 | 7 | 1 | 1 | 3 | 2 | 5 | 3 | 3 | 1 | 1 | 1 | 1 | 1 | 1 | 1 | 1 | 1 | 1  | 1 | 5 | 6 | 1 | 6 | 1 |   |   |   |
| CHE | 5 | 5 | 1 | 4 | 6 | 6 | 1 | 3 | 7 | 7 | 1 | 3 | 4 | 2 | 4 | 5 | 4 | 1 | 2 | 1 | 1 | 1 | 1 | 1 | 1 | 2 | 1  | 1 | 5 | 6 | 2 | 6 | 2 |   |   |   |
| CHE | 3 | 5 | 5 | 3 | 4 | 4 | 4 | 4 | 1 | 7 | 1 | 1 | 6 | 1 | 1 | 7 | 2 | 1 | 1 | 1 | 1 | 1 | 1 | 1 | 1 | 2 | 1  | 2 | 6 | 4 | 1 | 4 | 1 |   |   |   |
| CHE | 4 | 3 | 5 | 5 | 6 | 3 | 5 | 3 | 7 | 7 | 1 | 1 | 4 | 1 | 5 | 1 | 6 | 1 | 2 | 1 | 1 | 1 | 1 | 1 | 1 | 1 | 1  | 1 | 5 | 4 | 1 | 4 | 1 |   |   |   |
| CHE | 7 | 7 | 4 | 5 | 7 | 7 | 5 | 5 | 7 | 7 | 1 | 1 | 5 | 6 | 6 | 6 | 6 | 6 | 1 | 1 | 1 | 1 | 1 | 1 | 1 | 2 | 1  | 1 | 2 | 5 | 2 | 5 | 2 |   |   |   |
| CHE | 5 | 5 | 2 | 3 | 5 | 5 | 3 | 3 | 7 | 7 | 1 | 1 | 4 | 2 | 5 | 2 | 1 | 1 | 1 | 1 | 1 | 1 | 1 | 1 | 1 | 1 | 1  | 1 | 5 | 4 | 1 | 4 | 1 |   |   |   |
| CHE | 6 | 6 | 2 | 2 | 6 | 6 | 2 | 2 | 7 | 4 | 1 | 1 | 3 | 2 | 2 | 2 | 5 | 1 | 1 | 1 | 1 | 1 | 1 | 1 | 1 | 1 | 1  | 1 | 1 | 6 | 4 | 1 | 4 | 1 |   |   |
| CHE | 6 | 5 | 3 | 5 | 6 | 5 | 3 | 3 | 6 | 7 | 3 | 5 | 4 | 1 | 2 | 5 | 4 | 1 | 1 | 1 | 1 | 1 | 1 | 1 | 4 | 4 | 1  | 2 | 1 | 5 | 5 | 2 | 5 | 2 |   |   |
| CHE | 4 | 4 | 4 | 5 | 4 | 4 | 5 | 5 | 6 | 7 | 2 | 2 | 4 | 1 | 4 | 6 | 6 | 1 | 2 | 1 | 1 | 1 | 1 | 1 | 1 | 2 | 1  | 1 | 5 | 6 | 2 | 6 | 2 |   |   |   |
| CHE | 3 | 3 | 7 | 7 | 3 | 3 | 7 | 7 | 7 | 7 | 4 | 4 | 6 | 1 | 1 | 6 | 7 | 1 | 2 | 1 | 1 | 1 | 1 | 2 | 2 | 2 | 2  | 1 | 5 | 5 | 1 | 5 | 1 |   |   |   |
| CHE | 4 | 5 | 2 | 5 | 4 | 4 | 1 | 4 | 7 | 6 | 1 | 2 | 5 | 2 | 2 | 5 | 4 | 1 | 2 | 1 | 1 | 1 | 1 | 1 | 1 | 1 | 2  | 2 | 1 | 5 | 6 | 1 | 6 | 1 |   |   |
| CHE | 6 | 5 | 3 | 4 | 6 | 5 | 5 | 5 | 6 | 6 | 2 | 2 | 3 | 1 | 5 | 5 | 3 | 1 | 2 | 1 | 1 | 1 | 1 | 2 | 2 | 1 | 1  | 1 | 5 | 7 | 1 | 7 | 1 |   |   |   |
| CHE | 2 | 2 | 4 | 6 | 4 | 2 | 1 | 4 | 7 | 7 | 2 | 2 | 4 | 1 | 3 | 3 | 5 | 1 | 2 | 1 | 1 | 1 | 1 | 1 | 1 | 2 | 1  | 1 | 5 | 5 | 1 | 5 | 1 |   |   |   |
| CHE | 3 | 2 | 5 | 6 | 5 | 5 | 3 | 5 | 7 | 7 | 3 | 3 | 5 | 1 | 5 | 6 | 3 | 1 | 2 | 1 | 1 | 1 | 1 | 1 | 1 | 1 | 1  | 1 | 5 | 7 | 1 | 7 | 1 |   |   |   |
| CHE | 4 | 4 | 3 | 5 | 6 | 5 | 1 | 3 | 6 | 5 | 2 | 2 | 3 | 1 | 3 | 5 | 3 | 1 | 1 | 1 | 1 | 1 | 1 | 1 | 1 | 1 | 1  | 1 | 5 | 6 | 1 | 6 | 1 |   |   |   |
| CLA | 4 | 5 | 5 | 6 | 4 | 4 | 5 | 7 | 7 | 7 | 4 | 2 | 5 | 1 | 1 | 5 | 7 | 1 | 1 | 1 | 1 | 1 | 1 | 1 | 1 | 1 | 1  | 1 | 1 | 5 | 4 | 4 | 4 | 4 |   |   |
| CLA | 5 | 5 | 2 | 3 | 5 | 5 | 2 | 5 | 6 | 6 | 2 | 2 | 5 | 2 | 2 | 2 | 6 | 2 | 3 | 2 | 5 | 1 | 1 | 1 | 5 | 1 | 6  | 1 | 5 | 4 | 2 | 4 | 2 |   |   |   |
| CLA | 6 | 5 | 1 | 6 | 5 | 4 | 3 | 5 | 5 | 7 | 7 | 3 | 5 | 1 | 4 | 7 | 3 | 2 | 2 | 2 | 3 | 3 | 3 | 3 | 3 | 3 | DK | 2 | 1 | 1 | 5 | 5 | 4 | 5 | 4 |   |
| CLA | 5 | 5 | 2 | 4 | 4 | 5 | 5 | 3 | 6 | 6 | 5 | 5 | 6 | 1 | 2 | 5 | 5 | 1 | 2 | 1 | 1 | 1 | 1 | 1 | 1 | 1 | 2  | 1 | 1 | 5 | 1 | 4 | 1 | 4 |   |   |
| CLA | 5 | 5 | 3 | 5 | 5 | 5 | 4 | 5 | 6 | 6 | 5 | 4 | 7 | 2 | 4 | 6 | 5 | 2 | 2 | 2 | 5 | 5 | 5 | 5 | 5 | 5 | 2  | 4 | 1 | 5 | 6 | 1 | 6 | 1 |   |   |
| CLA | 2 | 2 | 6 | 6 | 3 | 3 | 5 | 5 | 3 | 6 | 6 | 4 | 4 | 1 | 2 | 4 | 5 | 2 | 3 | 2 | 4 | 4 | 4 | 4 | 4 | 4 | 1  | 2 | 5 | 1 | 5 | 1 |   |   |   |   |
| CLA | 7 | 7 | 1 | 6 | 7 | 7 | 1 | 6 | 7 | 7 | 6 | 3 | 6 | 1 | 1 | 6 | 6 | 1 | 1 | 1 | 5 | 5 | 5 | 5 | 5 | 5 | 1  | 1 | 4 | 1 | 5 | 4 | 3 | 4 | 3 |   |
| CLA | 5 | 5 | 4 | 4 | 5 | 6 | 2 | 4 | 3 | 6 | 5 | 3 | 6 | 1 | 1 | 2 | 5 | 1 | 1 | 1 | 3 | 3 | 3 | 3 | 3 | 3 | 3  | 3 | 1 | 2 | 1 | 5 | 3 | 3 | 3 | 3 |
| CLA | 5 | 5 | 3 | 3 | 4 | 4 | 3 | 5 | 5 | 5 | 5 | 2 | 5 | 1 | 2 | 5 | 5 | 1 | 1 | 1 | 1 | 1 | 1 | 1 | 1 | 1 | 2  | 1 | 1 | 5 | 2 | 6 | 2 | 6 | 6 |   |
| CLA | 4 | 5 | 2 | 6 | 3 | 6 | 2 | 5 | 6 | 6 | 5 | 2 | 6 | 1 | 2 | 5 | 5 | 1 | 1 | 1 | 5 | 5 | 5 | 5 | 5 | 5 | 2  | 1 | 5 | 7 | 2 | 7 | 2 | 2 |   |   |

|     |   |   |   |   |   |   |   |   |   |   |   |   |   |   |   |   |   |   |    |   |    |    |   |   |   |   |   |   |    |    |   |
|-----|---|---|---|---|---|---|---|---|---|---|---|---|---|---|---|---|---|---|----|---|----|----|---|---|---|---|---|---|----|----|---|
| CLA | 2 | 2 | 5 | 5 | 4 | 4 | 4 | 4 | 6 | 6 | 5 | 2 | 5 | 1 | 5 | 3 | 5 | 1 | 1  | 1 | 1  | 1  | 1 | 1 | 1 | 5 | 8 | 2 | 8  | 2  |   |
| CLA | 4 | 4 | 3 | 6 | 5 | 5 | 5 | 7 | 4 | 7 | 4 | 7 | 5 | 1 | 3 | 5 | 3 | 1 | DK | 1 | 1  | 1  | 1 | 2 | 1 | 5 | 5 | 3 | 5  | 3  |   |
| CLA | 5 | 6 | 1 | 3 | 5 | 6 | 1 | 3 | 7 | 7 | 7 | 7 | 6 | 1 | 1 | 2 | 6 | 1 | 1  | 1 | 5  | 1  | 1 | 4 | 1 | 5 | 4 | 3 | 4  | 3  |   |
| CLA | 5 | 5 | 3 | 5 | 4 | 4 | 4 | 4 | 6 | 3 | 5 | 5 | 6 | 2 | 3 | 5 | 5 | 1 | 1  | 2 | 1  | 1  | 1 | 1 | 5 | 4 | 2 | 4 | 2  |    |   |
| CLA | 7 | 7 | 4 | 6 | 5 | 5 | 7 | 5 | 7 | 7 | 4 | 3 | 5 | 1 | 1 | 7 | 6 | 1 | 1  | 2 | 1  | 1  | 1 | 1 | 5 | 1 | 5 | 1 | 5  |    |   |
| CLA | 5 | 2 | 5 | 3 | 5 | 5 | 3 | 5 | 5 | 7 | 6 | 3 | 6 | 1 | 2 | 3 | 7 | 1 | 1  | 2 | 1  | 2  | 1 | 1 | 5 | 5 | 1 | 5 | 1  |    |   |
| CLA | 6 | 6 | 1 | 4 |   |   |   |   | 3 | 5 | 5 | 4 | 6 | 1 | 1 | 7 | 5 | 1 | 1  | 2 | 5  | 2  | 1 | 3 | 1 | 5 | 4 | 3 | 4  | 3  |   |
| CLA | 6 | 4 | 5 | 7 | 6 | 7 | 4 | 6 | 5 | 7 | 4 | 4 | 7 | 3 | 6 | 5 | 5 | 1 | 2  | 2 | 1  | 1  | 1 | 1 | 5 | 7 | 2 | 7 | 2  |    |   |
| CLA | 2 | 2 | 5 | 5 | 2 | 2 | 6 | 6 | 7 | 7 | 7 | 7 | 7 | 4 | 2 | 2 | 2 | 6 | 1  | 3 | 2  | 1  | 1 | 1 | 2 | 2 | 2 | 2 | 2  |    |   |
| CLA | 6 | 5 | 2 | 1 | 7 | 4 | 1 | 2 | 6 | 6 | 3 | 2 | 3 | 2 | 6 | 6 | 4 | 1 | 1  | 2 | 1  | 2  | 4 | 1 | 5 | 1 | 6 | 1 | 6  |    |   |
| CLA | 1 | 4 | 2 | 3 | 4 | 5 | 2 | 3 | 5 | 6 | 6 | 3 | 5 | 1 | 2 | 5 | 6 | 2 | 2  | 2 | 5  | 1  | 4 | 1 | 7 | 4 | 2 | 4 | 2  |    |   |
| CLA | 7 | 3 | 3 | 6 | 7 | 6 | 2 | 2 | 7 | 7 | 1 | 1 | 4 | 1 | 1 | 1 | 7 | 1 | 1  | 1 | 1  | 2  | 1 | 1 | 5 | 1 | 1 | 1 | 1  |    |   |
| CLA | 4 | 7 | 3 | 5 | 6 | 5 | 3 | 5 | 7 | 7 | 6 | 6 | 7 | 1 | 4 | 5 | 6 | 1 | 2  | 1 | 5  | 2  | 1 | 5 | 1 | 5 | 3 | 4 | 3  | 4  |   |
| CLA | 3 | 4 | 4 | 5 | 2 | 2 | 3 | 6 | 2 | 5 | 4 | 1 | 5 | 1 | 2 | 5 | 4 | 1 | 2  | 1 | 1  | 2  | 2 | 1 | 5 | 2 | 4 | 2 | 4  |    |   |
| COM | 6 | 7 | 1 | 2 | 5 | 5 | 1 | 2 | 7 | 7 | 4 | 4 | 6 | 1 | 5 | 6 | 4 | 1 | 1  | 2 | 6  | EM | 1 | 6 | 1 | 5 | 1 | 5 | EM | EM |   |
| COM | 6 | 6 | 3 | 3 | 5 | 5 | 3 | 3 | 4 | 6 | 6 | 6 | 7 | 6 | 4 | 4 | 6 | 1 | 1  | 2 | 1  | 1  | 1 | 1 | 2 | 3 | 4 | 3 | 4  |    |   |
| COM | 5 | 3 | 5 | 3 | 3 | 3 | 5 | 5 | 6 | 7 | 4 | 3 | 4 | 1 | 4 | 2 | 4 | 1 | 1  | 2 | 1  | 2  | 2 | 1 | 5 | 1 | 6 | 1 | 6  |    |   |
| COM | 2 | 2 | 6 | 7 | 6 | 2 | 2 | 6 | 7 | 7 | 6 | 5 | 6 | 1 | 1 | 2 | 7 | 1 | 1  | 2 | 1  | 1  | 1 | 1 | 5 | 6 | 2 | 6 | 2  |    |   |
| COM | 4 | 3 | 3 | 5 | 4 | 5 | 3 | 3 | 6 | 6 | 3 | 3 | 4 | 1 | 2 | 4 | 5 | 1 | 1  | 2 | 5  | 2  | 1 | 5 | 1 | 5 | 4 | 2 | 4  | 2  |   |
| COM | 2 | 2 | 5 | 5 | 2 | 2 | 3 | 4 | 5 | 6 | 6 | 4 | 7 | 1 | 1 | 3 | 7 | 1 | 2  | 1 | 4  | DK | 2 | 1 | 1 | 5 | 6 | 2 | 6  | 2  |   |
| COM | 6 | 7 | 4 | 5 | 7 | 6 | 5 | 5 | 6 | 5 | 6 | 6 | 6 | 3 | 4 | 6 | 5 | 1 | 1  | 1 | 6  | EM | 1 | 6 | 1 | 5 | 7 | 2 | EM | EM |   |
| COM | 6 | 4 | 2 | 5 | 5 | 2 | 2 | 5 | 7 | 7 | 7 | 7 | 7 | 1 | 1 | 2 | 7 | 1 | 1  | 2 | 3  | DK | 2 | 3 | 1 | 5 | 4 | 1 | 4  | 1  |   |
| COM | 7 | 6 | 1 | 3 | 3 | 3 | 7 | 6 | 6 | 6 | 6 | 4 | 6 | 1 | 2 | 6 | 7 | 1 | 1  | 2 | 5  | 1  | 1 | 4 | 1 | 5 | 3 | 4 | 3  | 4  |   |
| COM | 2 | 1 | 5 | 5 | 1 | 2 | 5 | 6 | 5 | 7 | 4 | 3 | 5 | 1 | 4 | 5 | 4 | 1 | 1  | 2 | 5  | 3  | 2 | 2 | 1 | 5 | 6 | 2 | 6  | 2  |   |
| COM | 4 | 4 | 3 | 4 | 3 | 2 | 6 | 5 | 4 | 6 | 5 | 3 | 4 | 1 | 4 | 5 | 3 | 1 | 1  | 2 | 5  | 2  | 2 | 4 | 1 | 5 | 4 | 2 | 4  | 2  |   |
| COM | 5 | 4 | 4 | 5 | 3 | 3 | 6 | 6 | 7 | 7 | 7 | 4 | 5 | 1 | 3 | 5 | 5 | 1 | 1  | 1 | 5  | 2  | 2 | 3 | 1 | 3 | 4 | 5 | 4  | 5  |   |
| COM | 7 | 7 | 1 | 4 | 3 | 3 | 3 | 3 | 2 | 3 | 7 | 4 | 9 | 7 | 1 | 1 | 7 | 1 | 1  | 1 | 5  | 2  | 1 | 5 | 1 | 5 | 2 | 4 | 2  | 4  |   |
| COM | 3 | 2 | 6 | 3 | 3 | 3 | 2 | 2 | 6 | 6 | 5 | 3 | 7 | 1 | 1 | 4 | 5 | 1 | 1  | 1 | 5  | 2  | 1 | 5 | 1 | 5 | 4 | 3 | 4  | 3  |   |
| COM | 1 | 2 | 7 | 7 | 2 | 3 | 3 | 3 | 2 | 2 | 2 | 2 | 7 | 1 | 1 | 7 | 2 | 1 | 2  | 4 | SR | 5  | 2 | 1 | 5 | 1 | 5 | 4 | 2  | 4  | 2 |
| COM | 3 | 2 | 6 | 7 | 2 | 3 | 6 | 5 | 6 | 5 | 3 | 3 | 6 | 1 | 2 | 4 | 6 | 1 | 1  | 1 | 4  | 2  | 1 | 2 | 1 | 5 | 3 | 4 | 3  | 4  |   |
| COM | 2 | 2 | 5 | 3 | 3 | 5 | 3 | 3 | 6 | 6 | 5 | 5 | 5 | 2 | 2 | 3 | 5 | 1 | 1  | 1 | 4  | 2  | 2 | 3 | 1 | 5 | 2 | 4 | 2  | 4  |   |
| COM | 3 | 5 | 5 | 5 | 3 | 5 | 5 | 5 | 5 | 6 | 3 | 4 | 7 | 1 | 3 | 2 | 6 | 1 | 2  | 1 | 5  | 2  | 1 | 5 | 1 | 5 | 2 | 3 | 2  | 3  |   |

|     |   |   |   |   |   |   |   |   |   |   |   |   |    |   |   |   |   |   |    |   |    |    |   |   |   |   |   |   |    |    |
|-----|---|---|---|---|---|---|---|---|---|---|---|---|----|---|---|---|---|---|----|---|----|----|---|---|---|---|---|---|----|----|
| COM | 3 | 5 | 3 | 5 | 3 | 5 | 5 | 6 | 6 | 6 | 6 | 6 | 6  | 2 | 2 | 6 | 6 | 1 | 1  | 2 | 3  | 2  | 2 | 5 | 1 | 6 | 5 | 2 | 5  | 2  |
| COM | 2 | 2 | 7 | 7 | 3 | 2 | 5 | 4 | 7 | 7 | 7 | 7 | 7  | 1 | 5 | 6 | 5 | 1 | 1  | 1 | 1  | 2  | 1 | 1 | 3 | 4 | 3 | 4 | 3  |    |
| COM | 2 | 3 | 4 | 2 | 4 | 4 | 4 | 4 | 3 | 6 | 4 | 4 | 3  | 1 | 2 | 7 | 3 | 1 | 1  | 2 | 6  | RP | 1 | 4 | 1 | 5 | 2 | 6 | 2  | 6  |
| COM | 4 | 5 | 3 | 3 | 7 | 6 | 3 | 4 | 7 | 7 | 6 | 5 | 10 | 1 | 2 | 7 | 1 | 1 | 2  | 1 | 5  | 2  | 1 | 6 | 1 | 5 | 3 | 3 | 3  | 3  |
| COM | 1 | 4 | 1 | 4 | 1 | 4 | 1 | 4 | 7 | 7 | 5 | 5 | 6  | 1 | 5 | 5 | 6 | 1 | 2  | 1 | 6  | EM | 2 | 6 | 1 | 5 | 1 | 3 | EM | EM |
| COM | 6 | 4 | 6 | 7 | 6 | 4 | 6 | 7 | 7 | 7 | 5 | 4 | 6  | 1 | 2 | 7 | 3 | 1 | 1  | 2 | 2  | 1  | 2 | 1 | 5 | 4 | 2 | 4 | 2  |    |
| COM | 6 | 6 | 2 | 7 | 6 | 5 | 3 | 6 | 7 | 7 | 5 | 4 | 8  | 1 | 5 | 7 | 5 | 1 | 1  | 1 | 1  | 2  | 2 | 1 | 5 | 6 | 3 | 6 | 3  |    |
| COM | 1 | 2 | 5 | 5 | 1 | 2 | 5 | 6 | 6 | 7 | 6 | 5 | 7  | 2 | 4 | 6 | 2 | 1 | 1  | 1 | 1  | 2  | 1 | 1 | 5 | 5 | 4 | 5 | 4  |    |
| COM | 7 | 5 | 4 | 5 | 6 | 5 | 4 | 6 | 6 | 7 | 4 | 6 | 6  | 1 | 2 | 6 | 2 | 1 | 1  | 2 | 1  | 2  | 2 | 1 | 5 | 1 | 7 | 1 | 7  |    |
| COM | 2 | 4 | 6 | 6 | 2 | 2 | 4 | 6 | 3 | 7 | 5 | 3 | 8  | 1 | 1 | 7 | 1 | 1 | 1  | 2 | 1  | 2  | 1 | 1 | 5 | 2 | 3 | 2 | 3  |    |
| COM | 1 | 1 | 4 | 7 | 1 | 1 | 4 | 7 | 6 | 5 | 4 | 4 | 4  | 1 | 2 | 5 | 5 | 1 | DK | 2 | 1  | 2  | 2 | 1 | 2 | 4 | 4 | 4 | 4  |    |
| COM | 5 | 3 | 3 | 3 | 5 | 5 | 3 | 3 | 6 | 6 | 3 | 3 | 7  | 2 | 2 | 6 | 5 | 1 | 1  | 1 | 1  | 1  | 1 | 4 | 1 | 5 | 3 | 5 | 3  | 5  |
| COM | 5 | 5 | 2 | 2 | 5 | 5 | 2 | 2 | 6 | 6 | 3 | 1 | 7  | 4 | 4 | 6 | 2 | 1 | 2  | 1 | 1  | 2  | 3 | 1 | 5 | 1 | 1 | 1 | 1  | 1  |
| COM | 1 | 1 | 7 | 7 | 7 | 1 | 7 | 1 | 6 | 7 | 7 | 4 | 8  | 1 | 1 | 7 | 4 | 1 | 1  | 2 | 1  | 2  | 2 | 1 | 5 | 1 | 3 | 1 | 3  |    |
| COM | 2 | 2 | 5 | 6 | 2 | 2 | 5 | 6 | 5 | 5 | 2 | 2 | 6  | 1 | 2 | 7 | 5 | 1 | 1  | 1 | 5  | 2  | 1 | 3 | 2 | 5 | 4 | 2 | 4  | 2  |
| COM | 4 | 4 | 3 | 5 | 5 | 5 | 2 | 2 | 7 | 7 | 6 | 4 | 8  | 1 | 2 | 7 | 5 | 1 | 1  | 1 | 1  | 2  | 1 | 1 | 5 | 4 | 6 | 4 | 6  |    |
| COM | 6 | 3 | 5 | 5 | 2 | 2 | 6 | 5 | 6 | 7 | 6 | 6 | 7  | 1 | 1 | 6 | 5 | 1 | 1  | 2 | 5  | 1  | 1 | 5 | 1 | 5 | 4 | 3 | 4  | 3  |
| COM | 2 | 5 | 7 | 7 | 2 | 2 | 3 | 5 | 4 | 6 | 5 | 3 | 7  | 1 | 4 | 7 | 4 | 1 | 1  | 2 | 1  | 2  | 1 | 1 | 2 | 2 | 3 | 2 | 3  |    |
| COM | 6 | 6 | 2 | 5 | 6 | 5 | 5 | 5 | 7 | 7 | 4 | 3 | 7  | 1 | 1 | 7 | 5 | 1 | 2  | 1 | 5  | 2  | 1 | 5 | 1 | 5 | 4 | 4 | 4  | 4  |
| COM | 6 | 6 | 6 | 6 | 6 | 6 | 6 | 6 | 7 | 7 | 7 | 6 | 8  | 1 | 1 | 6 | 1 | 1 | 1  | 2 | 1  | 2  | 2 | 1 | 2 | 3 | 5 | 3 | 5  |    |
| COM | 7 | 6 | 2 | 3 | 7 | 6 | 4 | 2 | 5 | 7 | 3 | 2 | 6  | 1 | 1 | 7 | 1 | 1 | 1  | 4 | R1 | 1  | 2 | 2 | 1 | 6 | 3 | 4 | 3  | 4  |
| COM | 2 | 2 | 2 | 6 | 2 | 2 | 5 | 2 | 2 | 4 | 7 | 5 | 8  | 2 | 2 | 7 | 5 | 1 | 2  | 2 | 5  | 2  | 1 | 5 | 2 | 6 | 3 | 3 | 3  | 3  |
| COM | 5 | 4 | 5 | 5 | 5 | 5 | 5 | 5 | 6 | 6 | 6 | 7 | 5  | 1 | 2 | 7 | 2 | 1 | 1  | 3 | 1  | 2  | 1 | 1 | 2 | 3 | 3 | 3 | 3  | 3  |
| COM | 6 | 6 | 1 | 4 | 5 | 6 | 1 | 6 | 6 | 6 | 7 | 6 | 6  | 2 | 2 | 6 | 2 | 1 | 1  | 2 | 3  | 1  | 2 | 4 | 1 | 5 | 2 | 4 | 2  | 4  |
| COM | 2 | 6 | 2 | 2 | 3 | 6 | 2 | 2 | 6 | 6 | 4 | 4 | 8  | 1 | 1 | 7 | 1 | 1 | 1  | 2 | 5  | 1  | 2 | 5 | 2 | 5 | 4 | 4 | 4  | 4  |
| CLI | 3 | 3 | 3 | 5 | 5 | 5 | 2 | 5 | 6 | 7 | 6 | 4 | 7  | 1 | 3 | 5 | 6 | 1 | 1  | 2 | 1  | 2  | 2 | 1 | 5 | 1 | 3 | 1 | 3  |    |
| CLI | 4 | 5 | 2 | 4 | 5 | 5 | 3 | 4 | 2 | 6 | 5 | 5 | 6  | 1 | 1 | 1 | 7 | 1 | 1  | 2 | 6  | EM | 1 | 6 | 1 | 5 | 2 | 5 | EM | EM |
| CLI | 5 | 7 | 7 | 4 | 4 | 4 | 1 | 1 | 6 | 6 | 6 | 6 | 7  | 1 | 7 | 1 | 6 | 1 | 4  | 2 | 3  | 3  | 1 | 3 | 1 | 6 | 6 | 6 | 6  | 6  |
| CLI | 2 | 5 | 2 | 4 | 3 | 5 | 1 | 3 | 4 | 6 | 3 | 6 | 6  | 1 | 1 | 2 | 6 | 1 | 1  | 2 | 5  | 2  | 1 | 3 | 1 | 5 | 5 | 3 | 5  | 3  |
| CLI | 4 | 5 | 4 | 4 | 3 | 4 | 5 | 5 | 6 | 5 | 6 | 2 | 7  | 1 | 3 | 6 | 6 | 1 | 2  | 2 | 5  | 2  | 1 | 4 | 1 | 6 | 4 | 4 | 4  | 4  |
| CLI | 6 | 6 | 1 | 4 | 4 | 2 | 4 | 2 | 6 | 5 | 6 | 6 | 8  | 3 | 1 | 4 | 6 | 1 | 2  | 2 | 3  | 3  | 2 | 6 | 1 | 5 | 2 | 5 | 2  | 5  |
| CLI | 4 | 4 | 4 | 5 |   |   |   | 4 | 7 | 5 | 7 | 2 |    | 7 | 7 | 1 | 7 | 1 | 2  | 2 | 1  |    | 2 | 2 | 1 | 6 | 1 | 5 | 1  | 5  |

|     |   |   |   |   |   |   |   |   |   |   |   |   |   |   |   |   |   |   |   |   |   |    |   |   |   |   |   |   |    |    |
|-----|---|---|---|---|---|---|---|---|---|---|---|---|---|---|---|---|---|---|---|---|---|----|---|---|---|---|---|---|----|----|
| CLI | 4 | 4 | 5 | 2 | 4 | 4 | 4 | 3 | 7 | 7 | 7 | 7 | 8 | 1 | 1 | 1 | 7 | 1 | 2 | 2 | 1 | 1  | 2 | 1 | 6 | 5 | 3 | 5 | 3  |    |
| CLI | 3 | 3 | 5 | 6 | 5 | 6 | 5 | 4 | 7 | 6 | 6 | 4 | 7 | 4 | 3 | 7 | 6 | 1 | 1 | 2 | 1 | 2  | 2 | 1 | 5 | 8 | 3 | 8 | 3  |    |
| CLI | 2 | 2 | 2 | 3 | 2 | 2 | 2 | 3 | 7 | 7 | 1 | 1 | 7 | 1 | 2 | 2 | 7 | 1 | 1 | 2 | 1 | 2  | 2 | 1 | 5 | 7 | 1 | 7 | 1  |    |
| CLI | 5 | 5 | 3 | 4 | 3 | 6 | 6 | 6 | 7 | 7 | 6 | 2 | 5 | 5 | 3 | 5 | 3 | 1 | 1 | 2 | 1 | 2  | 1 | 5 | 3 | 5 | 3 | 5 |    |    |
| CLI | 5 | 5 | 2 | 3 | 5 | 5 | 2 | 3 | 7 | 7 | 7 | 4 | 6 | 1 | 3 | 5 | 5 | 1 | 1 | 2 | 1 | 2  | 1 | 5 | 1 | 6 | 1 | 6 |    |    |
| CLI | 4 | 3 | 2 | 3 | 4 | 3 | 2 | 3 | 6 | 5 | 3 | 3 | 6 | 1 | 1 | 3 | 5 | 1 | 2 | 2 | 5 | DK | 2 | 3 | 1 | 5 | 5 | 2 | 5  | 2  |
| CLI | 1 | 2 | 7 | 6 | 2 | 2 | 5 | 4 | 6 | 6 | 6 | 5 | 5 | 1 | 3 | 4 | 5 | 1 | 1 | 2 | 1 | 2  | 2 | 1 | 5 | 2 | 4 | 2 | 4  |    |
| CLI | 6 | 5 | 4 | 2 | 7 | 7 | 7 | 2 | 7 | 6 | 4 | 2 | 6 | 1 | 1 | 7 | 5 | 1 | 1 | 2 | 1 | 2  | 1 | 5 | 1 | 6 | 1 | 6 |    |    |
| CLI | 6 | 6 | 2 | 5 | 5 | 5 | 4 | 5 | 6 | 6 | 6 | 5 | 9 | 1 | 2 | 5 | 6 | 1 | 2 | 2 | 6 | CP | 1 | 5 | 1 | 5 | 2 | 7 | 2  | 7  |
| CLI | 5 | 5 | 3 | 7 | 7 | 3 | 3 | 7 | 5 | 7 | 5 | 3 | 6 | 1 | 1 | 1 | 7 | 1 | 2 | 1 | 1 | 2  | 1 | 5 | 2 | 3 | 2 | 3 |    |    |
| CLI | 4 | 3 | 5 | 5 | 5 | 5 | 4 | 4 | 5 | 7 | 4 | 2 | 6 | 1 | 2 | 2 | 6 | 1 | 1 | 1 | 1 | 2  | 1 | 5 | 3 | 5 | 3 | 5 |    |    |
| CLI | 7 | 7 | 2 | 2 |   |   |   |   | 7 | 7 | 7 | 7 | 8 | 1 |   | 4 | 7 | 1 | 1 | 2 | 3 | 4  | 2 | 3 | 1 | 5 | 3 | 3 | 3  | 3  |
| CLI | 2 | 2 | 1 | 1 | 2 | 2 | 1 | 1 | 4 | 4 | 6 | 2 | 5 | 1 | 2 | 6 | 4 | 1 | 1 | 1 | 1 | 2  | 1 | 5 | 3 | 3 | 3 | 3 | 3  |    |
| CLI | 6 | 5 | 2 | 5 | 5 | 4 | 4 | 4 | 4 | 5 | 2 | 2 | 8 | 1 | 1 | 2 | 7 | 1 | 1 | 1 | 1 | 2  | 1 | 2 | 2 | 6 | 2 | 6 |    |    |
| CLI | 3 | 3 | 3 | 5 | 4 | 3 | 2 | 5 | 7 | 3 | 5 | 1 | 6 | 1 | 1 | 1 | 6 | 1 | 1 | 1 | 1 | 2  | 1 | 6 | 2 | 2 | 2 | 2 | 2  |    |
| CLI | 6 | 5 | 3 | 4 | 5 | 5 | 3 | 4 | 6 | 6 | 4 | 2 | 6 | 2 | 1 | 4 | 6 | 1 | 1 | 1 | 1 | 2  | 1 | 5 | 4 | 4 | 4 | 4 | 4  |    |
| CLI | 4 | 4 | 2 | 4 | 2 | 2 | 2 | 3 | 5 | 5 | 6 | 2 | 7 | 1 | 1 | 2 | 7 | 1 | 2 | 1 | 1 | 2  | 1 | 5 | 2 | 1 | 2 | 1 | 1  |    |
| CLI | 4 | 5 | 5 | 5 | 2 | 2 | 7 | 5 | 6 | 5 | 4 | 3 | 7 | 1 | 2 | 3 | 7 | 1 | 2 | 1 | 1 | 2  | 1 | 5 | 2 | 2 | 2 | 2 | 2  |    |
| CLI | 1 | 2 | 5 | 7 | 2 | 6 | 2 | 2 | 3 | 4 | 2 | 2 | 6 | 1 | 4 | 6 | 4 | 1 | 1 | 2 | 1 | 2  | 1 | 5 | 1 | 5 | 1 | 5 | 1  | 5  |
| CLI | 3 | 3 | 3 | 3 | 4 | 4 | 4 | 4 | 7 | 7 | 7 | 3 | 7 | 1 | 1 | 7 | 7 | 1 | 1 | 1 | 1 | 2  | 1 | 5 | 2 | 3 | 2 | 3 | 3  |    |
| CLI | 4 | 5 | 6 | 6 | 5 | 4 | 4 | 6 | 5 | 7 | 5 | 6 | 8 | 1 | 2 | 4 | 6 | 1 | 2 | 1 | 1 | 2  | 1 | 5 | 1 | 5 | 1 | 5 | 1  | 5  |
| CLI | 5 | 5 | 3 | 2 | 5 | 5 | 1 | 2 | 7 | 7 | 5 | 4 | 7 | 1 | 2 | 5 | 6 | 1 | 1 | 1 | 1 | 2  | 1 | 6 | 3 | 4 | 3 | 4 | 4  |    |
| CLI | 3 | 3 | 6 | 7 | 5 | 4 | 4 | 7 | 6 | 7 | 4 | 4 | 7 | 1 | 2 | 4 | 3 | 1 | 1 | 2 | 1 | 2  | 1 | 3 | 1 | 2 | 1 | 2 | 2  |    |
| CLI | 7 | 7 | 1 | 1 | 5 | 5 | 1 | 1 | 6 | 5 | 7 | 2 | 5 | 1 | 1 | 4 | 6 | 1 | 1 | 2 | 1 | 2  | 1 | 5 | 3 | 4 | 3 | 4 | 4  |    |
| CLI | 5 | 5 | 2 | 2 | 4 | 4 | 3 | 4 | 4 | 6 | 6 | 6 | 7 | 2 | 3 | 3 | 3 | 1 | 2 | 2 | 6 | EM | 1 | 6 | 1 | 5 | 1 | 5 | EM | EM |
| CLI | 4 | 5 | 3 | 6 | 5 | 4 | 3 | 6 | 5 | 6 | 5 | 4 | 8 | 1 | 2 | 3 | 6 | 1 | 1 | 1 | 1 | 2  | 1 | 5 | 2 | 3 | 2 | 3 | 3  |    |
| CLI | 7 | 6 | 1 | 5 | 2 | 1 | 5 | 6 | 6 | 7 | 6 | 6 | 7 | 5 | 7 | 7 | 1 | 1 | 1 | 1 | 1 | 2  | 1 | 7 | 6 | 2 | 6 | 2 | 2  |    |
| CLI | 5 | 4 | 3 | 3 | 6 | 6 | 2 | 2 | 7 | 5 | 4 | 3 | 6 | 1 | 2 | 5 | 5 | 1 | 1 | 1 | 5 | 2  | 1 | 4 | 1 | 5 | 2 | 6 | 2  | 6  |
| CLI | 6 | 7 | 3 | 3 | 5 | 5 | 1 | 4 | 2 | 7 | 5 | 2 | 5 | 3 | 5 | 6 | 3 | 1 | 1 | 1 | 1 | 2  | 1 | 5 | 3 | 7 | 3 | 7 | 7  |    |
| CLI | 4 | 5 | 6 | 2 | 4 | 4 | 3 | 3 | 6 | 5 | 4 | 2 | 4 | 1 | 7 | 7 | 2 | 1 | 1 | 1 | 1 | 2  | 1 | 5 | 5 | 4 | 5 | 4 | 4  |    |
| CLI | 5 | 4 | 6 | 6 | 7 | 5 | 3 | 4 | 7 | 7 | 7 | 3 | 7 | 1 | 1 | 3 | 7 | 1 | 2 | 1 | 3 | 2  | 1 | 1 | 2 | 1 | 6 | 1 | 6  | 6  |
| CLI | 4 | 5 | 2 | 5 | 6 | 5 | 2 | 6 | 5 | 6 | 6 | 3 | 7 | 1 | 2 | 3 | 7 | 1 | 1 | 1 | 6 | EM | 1 | 6 | 1 | 5 | 1 | 6 | EM | EM |

|     |   |   |   |   |   |   |   |   |   |   |   |   |   |   |   |   |   |   |   |   |    |    |   |   |   |   |   |   |    |    |
|-----|---|---|---|---|---|---|---|---|---|---|---|---|---|---|---|---|---|---|---|---|----|----|---|---|---|---|---|---|----|----|
| CLI | 3 | 4 | 4 | 5 | 4 | 4 | 4 | 4 | 6 | 6 | 6 | 4 | 6 | 2 | 2 | 5 | 6 | 1 | 3 | 1 | 1  | 2  | 1 | 2 | 5 | 5 | 2 | 5 | 2  |    |
| CLI | 6 | 3 | 6 | 4 | 5 | 5 | 3 | 4 | 7 | 6 | 6 | 6 | 7 | 1 | 2 | 4 | 6 | 1 | 1 | 1 | 1  | 1  | 1 | 1 | 5 | 3 | 3 | 3 | 3  |    |
| CLI | 1 | 1 | 6 | 6 | 2 | 2 | 5 | 5 | 6 | 6 | 6 | 4 | 6 | 1 | 1 | 3 | 6 | 1 | 1 | 1 | 4  | 1  | 2 | 3 | 1 | 5 | 3 | 3 | 3  | 3  |
| CLI | 3 | 6 | 4 | 4 | 5 | 7 | 2 | 2 | 6 | 7 | 5 | 5 | 5 | 1 | 1 | 2 | 5 | 1 | 1 | 1 | 5  | 1  | 1 | 3 | 1 | 5 | 4 | 1 | 4  | 1  |
| CSC | 7 | 7 | 1 | 5 | 7 | 7 | 1 | 7 | 7 | 7 | 1 | 1 | 4 | 7 | 4 | 6 | 7 | 1 | 3 | 2 | 5  | 5  | 1 | 4 | 1 | 2 | 3 | 5 | 3  | 5  |
| CSC | 3 | 2 | 5 | 6 | 3 | 3 | 5 | 5 | 6 | 6 | 3 | 3 | 5 | 1 | 2 | 5 | 3 | 1 | 1 | 2 | 1  | 1  | 1 | 1 | 2 | 2 | 2 | 2 | 2  |    |
| CSC | 1 | 1 | 7 | 7 | 5 | 4 | 3 | 5 | 6 | 5 | 2 | 3 | 2 | 1 | 6 | 7 | 2 | 1 | 1 | 2 | 6  | RG | 1 | 1 | 1 | 2 | 1 | 6 | 1  | 6  |
| CSC | 6 | 5 | 2 | 2 | 5 | 6 | 2 | 2 | 7 | 7 | 5 | 5 | 2 | 1 | 4 | 6 | 5 | 1 | 1 | 2 | 6  | EM | 1 | 6 | 1 | 5 | 1 | 1 | EM | EM |
| CSC | 5 | 5 | 3 | 4 | 3 | 3 | 5 | 5 | 5 | 5 | 3 | 2 | 2 | 1 | 2 | 3 | 5 | 1 | 1 | 2 | 1  | 1  | 1 | 2 | 5 | 1 | 7 | 1 | 7  |    |
| CSC | 5 | 5 | 2 | 6 | 6 | 5 | 2 | 6 | 7 | 7 | 2 | 2 | 2 | 3 | 7 | 7 | 2 | 1 | 1 | 2 | 1  | 1  | 1 | 1 | 5 | 1 | 5 | 1 | 5  |    |
| CSC | 5 | 5 | 3 | 3 | 5 | 5 | 3 | 4 | 5 | 5 | 5 | 5 | 2 | 1 | 4 | 5 | 2 | 1 | 1 | 2 | 1  | 1  | 1 | 2 | 3 | 5 | 3 | 5 |    |    |
| CSC | 2 | 2 | 5 | 6 | 3 | 2 | 6 | 5 | 6 | 5 | 1 | 2 | 3 | 2 | 4 | 4 | 4 | 1 | 1 | 2 | 1  | 1  | 1 | 1 | 5 | 7 | 1 | 7 | 1  |    |
| CSC | 3 | 5 | 3 | 6 | 4 | 3 | 4 | 5 | 7 | 6 | 2 | 4 | 1 | 1 | 1 | 6 | 4 | 1 | 1 | 2 | 1  | 1  | 1 | 1 | 5 | 5 | 2 | 5 | 2  |    |
| CSC | 4 | 5 | 6 | 5 | 5 | 5 | 2 | 6 | 6 | 6 | 2 | 1 | 2 | 5 | 4 | 5 | 7 | 1 | 1 | 2 | 6  | EM | 1 | 5 | 1 | 5 | 1 | 4 | EM | EM |
| CSC | 2 | 2 | 5 | 3 | 2 | 2 | 6 | 3 | 6 | 6 | 2 | 2 | 4 | 2 | 5 | 5 | 5 | 1 | 1 | 2 | 1  | 1  | 1 | 1 | 2 | 5 | 2 | 5 | 2  |    |
| CSC | 7 | 5 | 1 | 3 | 6 | 5 | 2 | 3 | 6 | 5 | 2 | 3 | 4 | 1 | 4 | 5 | 3 | 1 | 1 | 2 | 5  | 1  | 1 | 3 | 1 | 5 | 2 | 4 | 2  | 4  |
| CSC | 4 | 3 | 3 | 5 | 5 | 4 | 3 | 4 | 5 | 5 | 1 | 1 | 2 | 5 | 6 | 7 | 2 | 1 | 1 | 2 | 1  | 1  | 1 | 1 | 2 | 5 | 1 | 5 | 1  |    |
| CSC | 2 | 2 | 1 | 1 | 3 | 3 | 1 | 3 | 5 | 6 | 1 | 3 | 2 | 1 | 1 | 5 | 3 | 1 | 1 | 1 | 5  | 3  | 1 | 1 | 5 | 5 | 3 | 5 | 3  |    |
| CSC | 5 | 5 | 5 | 3 | 5 | 5 | 5 | 3 | 6 | 6 | 5 | 4 | 2 | 1 | 2 | 1 | 5 | 1 | 1 | 2 | 5  | 1  | 1 | 6 | 1 | 5 | 3 | 6 | 3  | 6  |
| CSC | 6 | 6 | 2 | 5 | 5 | 5 | 2 | 5 | 6 | 6 | 1 | 1 | 2 | 3 | 3 | 6 | 4 | 1 | 1 | 2 | 5  | 1  | 1 | 4 | 1 | 5 | 4 | 3 | 4  | 3  |
| CSC | 7 | 6 | 1 | 5 | 7 | 7 | 1 | 5 | 3 | 3 | 3 | 3 | 1 | 1 | 1 | 1 | 7 | 1 | 2 | 2 | 1  | 1  | 2 | 1 | 1 | 5 | 1 | 5 | 1  |    |
| CSC | 7 | 5 | 4 | 6 | 7 | 5 | 5 | 6 | 7 | 7 | 1 | 1 | 1 | 7 | 6 | 6 | 4 | 1 | 1 | 2 | 1  | 1  | 3 | 1 | 3 | 3 | 2 | 3 | 2  |    |
| CSC | 2 | 4 | 3 | 4 | 3 | 3 | 4 | 6 | 7 | 7 | 3 | 2 | 2 | 1 | 2 | 2 | 3 | 1 | 1 | 3 | 1  | 1  | 1 | 1 | 5 | 3 | 1 | 3 | 1  |    |
| CSC | 6 | 7 | 5 | 5 | 5 | 3 | 5 | 7 | 6 | 7 | 5 | 4 | 4 | 7 | 7 | 6 | 4 | 1 | 1 | 2 | 1  | 1  | 1 | 1 | 2 | 5 | 4 | 5 | 4  |    |
| CSC | 1 | 1 | 7 | 7 | 2 | 2 | 6 | 6 | 7 | 7 | 4 | 4 | 2 | 1 | 1 | 1 | 5 | 1 | 3 | 2 | 1  | 1  | 1 | 1 | 5 | 5 | 1 | 5 | 1  |    |
| CSC | 2 | 3 | 6 | 5 | 6 | 3 | 3 | 5 | 4 | 4 | 3 | 3 | 3 | 1 | 2 | 1 | 7 | 1 | 1 | 2 | 1  | 1  | 1 | 1 | 2 | 3 | 1 | 3 | 1  |    |
| CSC | 5 | 5 | 2 | 3 | 5 | 6 | 2 | 3 | 5 | 7 | 2 | 2 | 2 | 2 | 2 | 5 | 3 | 1 | 1 | 2 | 1  | 1  | 1 | 1 | 2 | 5 | 1 | 5 | 1  |    |
| CSC | 5 | 5 | 3 | 3 | 3 | 5 | 4 | 5 | 6 | 6 | 6 | 6 | 3 | 2 | 4 | 3 | 5 | 1 | 1 | 1 | 1  | 1  | 1 | 1 | 2 | 5 | 3 | 5 | 3  |    |
| CSC | 6 | 6 | 2 | 2 | 4 | 2 | 2 | 4 | 6 | 6 | 2 | 3 | 3 | 1 | 4 | 3 | 2 | 1 | 1 | 4 | PU | 1  | 1 | 2 | 1 | 5 | 1 | 5 | 1  | 5  |
| CSC | 1 | 3 | 3 | 5 | 6 | 4 | 4 | 4 | 6 | 5 | 4 | 3 | 3 | 1 | 4 | 6 | 2 | 1 | 1 | 2 | 5  | 2  | 1 | 2 | 1 | 5 | 4 | 3 | 4  | 3  |
| CSC | 4 | 3 | 4 | 5 | 5 | 4 | 3 | 4 | 5 | 5 | 6 | 6 | 3 | 1 | 3 | 3 | 5 | 1 | 1 | 2 | 1  | 1  | 1 | 1 | 2 | 3 | 5 | 3 | 5  |    |
| CSC | 5 | 4 | 3 | 5 | 4 | 4 | 3 | 4 | 6 | 6 | 2 | 2 | 3 | 1 | 6 | 6 | 3 | 1 | 2 | 2 | 5  | 1  | 2 | 3 | 2 | 7 | 5 | 3 | 5  | 3  |

|     |   |   |   |   |   |   |   |   |   |   |   |   |   |   |   |   |   |   |    |   |   |    |   |   |   |   |   |   |    |    |
|-----|---|---|---|---|---|---|---|---|---|---|---|---|---|---|---|---|---|---|----|---|---|----|---|---|---|---|---|---|----|----|
| CSC | 6 | 5 | 5 | 4 | 5 | 6 | 3 | 3 | 7 | 7 | 2 | 3 | 3 | 1 | 3 | 6 | 4 | 1 | 1  | 2 | 1 | 1  | 1 | 1 | 5 | 5 | 1 | 5 | 1  |    |
| CSC | 7 | 7 | 1 | 1 | 6 | 6 | 2 | 2 | 7 | 7 | 2 | 2 | 2 | 4 | 4 | 4 | 4 | 1 | 2  | 2 | 5 | 1  | 1 | 4 | 1 | 5 | 4 | 1 | 4  | 1  |
| CSC | 3 | 4 | 4 | 6 | 4 | 4 | 4 | 4 | 7 | 7 | 2 | 2 | 3 | 1 | 1 | 5 | 4 | 1 | 3  | 2 | 1 | 1  | 1 | 1 | 5 | 5 | 1 | 5 | 1  |    |
| CSC | 5 | 5 | 3 | 3 | 6 | 6 | 2 | 2 | 7 | 7 | 3 | 3 | 3 | 1 | 1 | 5 | 6 | 1 | 2  | 2 | 3 | DK | 1 | 5 | 1 | 5 | 1 | 3 | 1  | 3  |
| CSC | 3 | 5 | 1 | 3 | 4 | 4 | 2 | 4 | 6 | 5 | 2 | 1 | 2 | 1 | 4 | 6 | 1 | 1 | 2  | 2 | 5 | 1  | 2 | 5 | 1 | 5 | 6 | 3 | 6  | 3  |
| CSC | 7 | 6 | 3 | 6 | 7 | 4 | 7 | 5 | 3 | 4 | 4 | 4 | 4 | 1 | 1 | 1 | 4 | 2 | DK | 1 | 1 | 1  | 1 | 2 | 2 | 1 | 1 | 1 | 1  |    |
| CSC | 3 | 3 | 1 | 5 | 4 | 4 | 4 | 1 | 6 | 6 | 2 | 2 | 3 | 2 | 5 | 6 | 2 | 1 | 2  | 1 | 5 | 2  | 1 | 5 | 1 | 5 | 4 | 3 | 4  | 3  |
| CSC | 6 | 4 | 2 | 4 | 6 | 5 | 3 | 2 | 6 | 6 | 2 | 2 | 2 | 1 | 2 | 5 | 6 | 1 | 1  | 1 | 5 | 2  | 1 | 4 | 1 | 5 | 5 | 2 | 5  | 2  |
| CSC | 3 | 3 | 5 | 3 | 4 | 4 | 5 | 4 | 6 | 6 | 2 | 2 | 2 | 1 | 2 | 2 | 5 | 1 | 1  | 1 | 2 | 1  | 2 | 1 | 5 | 5 | 3 | 5 | 3  |    |
| CSC | 7 | 7 | 1 | 2 | 7 | 5 | 2 | 3 | 6 | 5 | 1 | 2 | 2 | 2 | 2 | 5 | 3 | 1 | 1  | 1 | 5 | 1  | 1 | 5 | 1 | 5 | 2 | 3 | 2  | 3  |
| CSC | 6 | 6 | 5 | 4 | 6 | 6 | 5 | 4 | 7 | 7 | 4 | 4 | 3 | 3 | 4 | 5 | 4 | 1 | 1  | 1 | 2 | 1  | 2 | 1 | 5 | 3 | 5 | 3 | 5  |    |
| CSC | 5 | 5 | 2 | 4 | 5 | 5 | 3 | 4 | 6 | 6 | 2 | 2 | 2 | 4 | 4 | 4 | 4 | 1 | 2  | 1 | 1 | 1  | 1 | 1 | 5 | 4 | 1 | 4 | 1  |    |
| CSC | 6 | 7 | 1 | 5 | 6 | 7 | 1 | 1 | 6 | 6 | 2 | 2 | 2 | 5 | 2 | 4 | 4 | 1 | 1  | 1 | 5 | 1  | 1 | 5 | 1 | 5 | 1 | 4 | 1  | 4  |
| CSC | 6 | 3 | 6 | 7 | 7 | 7 | 5 | 5 | 7 | 6 | 4 | 5 | 3 | 1 | 2 | 3 | 5 | 1 | 1  | 1 | 1 | 1  | 1 | 2 | 1 | 5 | 5 | 2 | 5  | 2  |
| CSC | 2 | 4 | 6 | 6 | 2 | 2 | 6 | 6 | 6 | 7 | 1 | 1 | 2 | 1 | 5 | 1 | 7 | 1 | 1  | 1 | 1 | 1  | 1 | 1 | 2 | 8 | 2 | 8 | 2  |    |
| CSC | 3 | 6 | 5 | 4 | 4 | 4 | 4 | 4 | 6 | 4 | 2 | 2 | 4 | 4 | 4 | 5 | 4 | 2 | 2  | 2 | 1 | 1  | 1 | 1 | 5 | 6 | 2 | 6 | 2  |    |
| CSC | 4 | 4 | 4 | 4 | 4 | 4 | 7 | 7 | 5 | 5 | 5 | 5 | 3 | 5 | 5 | 6 | 6 | 1 | 2  | 1 | 1 | 2  | 2 | 1 | 2 | 3 | 2 | 3 | 2  |    |
| CSC | 3 | 2 | 3 | 5 | 2 | 5 | 2 | 2 | 7 | 7 | 4 | 3 | 1 | 3 | 5 | 7 | 1 | 1 | 3  | 2 | 5 | 1  | 1 | 4 | 1 | 5 | 6 | 1 | 6  | 1  |
| CSC | 3 | 4 | 5 | 6 | 3 | 4 | 4 | 6 | 7 | 6 | 5 | 5 | 2 | 4 | 5 | 5 | 3 | 1 | 1  | 2 | 1 | 1  | 1 | 2 | 5 | 2 | 5 | 2 |    |    |
| EAR | 3 | 3 | 6 | 6 | 4 | 4 | 5 | 5 | 6 | 6 | 2 | 2 | 4 | 2 | 3 | 6 | 5 | 1 | 1  | 2 | 1 | 1  | 2 | 2 | 5 | 4 | 2 | 4 | 2  |    |
| EAR | 3 | 2 | 6 | 4 | 3 | 2 | 6 | 4 | 6 | 5 | 2 | 2 | 5 | 2 | 4 | 4 | 5 | 1 | 1  | 2 | 1 | 1  | 2 | 1 | 5 | 8 | 1 | 8 | 1  |    |
| EAR | 5 | 3 | 3 | 6 | 6 | 5 | 5 | 5 | 6 | 7 | 2 | 1 | 3 | 1 | 2 | 5 | 3 | 1 | 1  | 2 | 1 | 1  | 1 | 1 | 5 | 3 | 3 | 3 | 3  |    |
| EAR | 2 | 2 | 2 | 5 | 2 | 2 | 6 | 6 | 6 | 6 | 2 | 2 | 5 | 1 | 1 | 1 | 6 | 1 | 1  | 2 | 1 | 1  | 1 | 1 | 5 | 4 | 1 | 4 | 1  |    |
| EAR | 3 | 3 | 5 | 6 | 5 | 4 | 3 | 5 | 6 | 6 | 1 | 2 | 4 | 2 | 3 | 5 | 4 | 1 | 1  | 2 | 1 | 1  | 2 | 1 | 5 | 4 | 3 | 4 | 3  |    |
| EAR | 2 | 3 | 3 | 5 | 2 | 2 | 3 | 5 | 4 | 6 | 2 | 2 | 5 | 1 | 3 | 4 | 7 | 1 | 1  | 2 | 1 | 2  | 1 | 1 | 5 | 5 | 1 | 5 | 1  |    |
| EAR | 1 | 2 | 3 | 6 | 3 | 3 | 2 | 3 | 6 | 7 | 2 | 2 | 4 | 1 | 2 | 2 | 4 | 1 | 2  | 2 | 5 | 8  | 1 | 4 | 2 | 5 | 5 | 2 | 5  | 2  |
| EAR | 1 | 1 | 7 | 7 | 6 | 6 | 2 | 2 | 5 | 7 | 2 | 2 | 3 | 1 | 1 | 5 | 7 | 1 | 1  | 2 | 1 | 1  | 2 | 6 | 3 | 3 | 3 | 3 | 3  |    |
| EAR | 6 | 6 | 2 | 4 | 4 | 5 | 3 | 4 | 7 | 7 | 2 | 2 | 4 | 1 | 1 | 3 | 6 | 1 | 1  | 2 | 1 | 1  | 1 | 1 | 5 | 5 | 2 | 5 | 2  |    |
| EAR | 2 | 6 | 5 | 7 | 3 | 5 | 5 | 5 | 6 | 7 | 2 | 2 | 6 | 1 | 4 | 7 | 3 | 1 | 1  | 2 | 1 | 1  | 2 | 1 | 5 | 3 | 3 | 3 | 3  |    |
| EAR | 5 | 3 | 7 | 7 | 7 | 4 | 7 | 7 | 7 | 7 | 4 | 1 | 5 | 2 | 1 | 5 | 4 | 1 | 2  | 1 | 6 | EM | 1 | 6 | 1 | 5 | 1 | 8 | EM | EM |
| EAR | 6 | 4 | 5 | 6 | 2 | 4 | 2 | 5 | 4 | 6 | 2 | 2 | 4 | 1 | 6 | 7 | 4 | 1 | 3  | 1 | 6 | HE | 1 | 6 | 1 | 5 | 5 | 1 | 5  | 1  |
| EAR | 4 | 4 | 4 | 6 | 2 | 2 | 2 | 6 | 5 | 5 | 2 | 2 | 3 | 1 | 1 | 5 | 4 | 1 | 2  | 1 | 4 | 5  | 2 | 2 | 1 | 5 | 4 | 1 | 4  | 1  |

|     |   |   |   |   |   |   |   |   |   |   |   |   |   |   |   |   |   |   |   |   |   |    |   |   |   |   |   |   |   |    |    |
|-----|---|---|---|---|---|---|---|---|---|---|---|---|---|---|---|---|---|---|---|---|---|----|---|---|---|---|---|---|---|----|----|
| EAR | 6 | 7 | 4 | 4 | 6 | 6 | 2 | 3 | 5 | 7 | 3 | 3 | 4 | 1 | 1 | 1 | 7 | 1 | 3 | 1 | 5 | 4  | 1 | 5 | 1 | 1 | 7 | 2 | 7 | 2  |    |
| EAR | 6 | 4 | 1 | 3 | 6 | 6 | 1 | 4 | 7 | 7 | 1 | 1 | 4 | 6 | 6 | 6 | 6 | 1 | 2 | 1 | 5 | DK | 1 | 6 | 1 | 5 | 6 | 2 | 6 | 2  |    |
| EAR | 4 | 2 | 6 | 4 | 4 | 5 | 5 | 5 | 7 | 5 | 3 | 3 | 6 | 2 | 4 | 3 | 5 | 1 | 1 | 2 | 1 |    | 1 | 1 | 2 | 5 | 4 | 2 | 4 | 2  |    |
| EAR | 3 | 5 | 1 | 3 | 4 | 3 | 1 | 5 | 7 | 7 | 3 | 3 | 4 | 2 | 4 | 6 | 6 | 1 | 1 | 2 | 1 |    | 1 | 2 | 1 | 5 | 4 | 1 | 4 | 1  |    |
| EAR | 5 | 3 | 2 | 5 | 5 | 3 | 3 | 6 | 5 | 7 | 1 | 2 | 5 | 3 | 3 | 1 | 5 | 1 | 1 | 2 | 1 |    | 1 | 1 | 1 | 5 | 3 | 2 | 3 | 2  |    |
| EAR | 5 | 4 | 6 | 6 | 5 | 5 | 5 | 5 | 7 | 7 | 3 | 3 | 4 | 1 | 3 | 6 | 6 | 1 | 1 | 2 | 1 |    | 1 | 1 | 1 | 5 | 4 | 2 | 4 | 2  |    |
| EAR | 4 | 5 | 4 | 6 | 5 | 3 | 7 | 6 | 7 | 6 | 1 | 1 | 3 | 1 | 1 | 1 | 7 | 1 | 1 | 2 | 1 |    | 1 | 1 | 1 | 2 | 8 | 1 | 8 | 1  |    |
| EAR | 5 | 5 | 5 | 3 | 5 | 5 | 5 | 3 | 7 | 7 | 2 | 2 | 6 | 1 | 2 | 5 | 3 | 1 | 2 | 2 | 4 | 3  | 1 | 2 | 1 | 5 | 6 | 2 | 6 | 2  |    |
| EAR | 5 | 3 | 4 | 5 | 4 | 3 | 4 | 5 | 7 | 7 | 4 | 4 | 6 | 2 | 2 | 5 | 6 | 1 | 1 | 2 | 1 |    | 1 | 1 | 1 | 3 | 4 | 2 | 4 | 2  |    |
| EAR | 5 | 4 | 3 | 4 | 6 | 5 | 3 | 4 | 7 | 6 | 1 | 2 | 7 | 2 | 2 | 3 | 6 | 1 | 1 | 2 | 1 |    | 2 | 1 | 1 | 5 | 6 | 1 | 6 | 1  |    |
| EAR | 1 | 7 | 1 | 7 | 1 | 1 | 7 | 7 | 7 | 7 | 2 | 2 | 5 | 1 | 1 | 1 | 7 | 1 | 1 | 2 | 1 |    | 2 | 1 | 1 | 5 | 6 | 1 | 6 | 1  |    |
| EAR | 4 | 4 | 1 | 5 | 4 | 5 | 2 | 6 | 4 | 6 | 1 | 4 | 6 | 5 | 2 | 6 | 7 | 1 | 1 | 2 | 2 |    | 1 | 2 | 1 | 2 | 5 | 1 | 5 | 1  |    |
| EAR | 5 | 5 | 3 | 3 | 4 | 5 | 2 | 3 | 6 | 6 | 5 | 6 | 5 | 1 | 3 | 6 | 3 | 1 | 1 | 2 | 1 |    | 2 | 1 | 1 | 5 | 4 | 5 | 4 | 5  |    |
| EAR | 6 | 5 | 4 | 4 | 5 | 5 | 4 | 4 | 4 | 4 | 3 | 2 | 4 | 2 | 2 | 5 | 5 | 1 | 2 | 1 | 5 | 6  | 1 | 3 | 1 | 5 | 5 | 3 | 5 | 3  |    |
| EAR | 4 | 5 | 6 | 6 | 5 | 6 | 6 | 5 | 5 | 6 | 2 | 3 | 3 | 6 | 6 | 6 | 3 | 1 | 2 | 1 | 5 | 4  | 1 | 3 | 1 | 2 | 6 | 2 | 6 | 2  |    |
| EAR | 6 | 6 | 5 | 6 | 4 | 6 | 6 | 7 | 6 | 6 | 2 | 3 | 4 | 6 | 1 | 6 | 4 | 1 | 2 | 1 | 3 | 4  | 1 | 3 | 1 | 2 | 5 | 1 | 5 | 1  |    |
| EAR | 2 | 1 | 5 | 6 | 3 | 1 | 5 | 6 | 6 | 7 | 3 | 3 | 5 | 1 | 2 | 6 | 6 | 1 | 1 | 1 | 2 |    | 2 | 2 | 1 | 5 | 5 | 1 | 5 | 1  |    |
| EAR | 1 | 1 | 7 | 7 | 2 | 2 | 6 | 6 | 3 | 7 | 1 | 1 | 4 | 1 | 1 | 1 | 6 | 1 | 1 | 3 | 3 | 2  | 1 | 4 | 1 | 5 | 6 | 1 | 6 | 1  |    |
| EAR | 4 | 5 | 3 | 5 | 4 | 6 | 3 | 5 | 6 | 7 | 4 | 4 | 3 | 1 | 2 | 7 | 4 | 1 | 1 | 2 | 4 | 4  | 1 | 2 | 1 | 5 | 5 | 2 | 5 | 2  |    |
| EAR | 2 | 4 | 6 | 4 | 2 | 3 | 5 | 4 | 7 | 7 | 3 | 3 | 5 | 4 | 3 | 3 | 6 | 1 | 1 | 1 | 1 |    | 2 | 1 | 1 | 2 | 8 | 3 | 8 | 3  |    |
| EAR | 6 | 6 | 3 | 3 | 3 | 5 | 6 | 5 | 7 | 7 | 1 | 2 | 3 | 1 | 2 | 5 | 6 | 1 | 1 | 1 | 1 |    | 1 | 1 | 1 | 5 | 8 | 1 | 8 | 1  |    |
| EAR | 6 | 6 | 1 | 2 | 6 | 6 | 2 | 4 | 7 | 7 | 1 | 1 | 5 | 4 | 4 | 4 | 6 | 1 | 1 | 1 | 5 | 2  | 1 | 5 | 1 | 5 | 6 | 2 | 6 | 2  |    |
| EAR | 5 | 4 | 5 | 5 | 6 | 2 | 4 | 5 | 5 | 6 | 2 | 2 | 3 | 2 | 4 | 2 | 6 | 1 | 1 | 1 | 1 |    | 1 | 1 | 1 | 5 | 4 | 2 | 4 | 2  |    |
| EAR | 6 | 5 | 4 | 5 | 6 | 4 | 1 | 7 | 6 | 6 | 1 | 1 | 5 | 1 | 4 | 6 | 7 | 1 | 1 | 1 | 1 |    | 1 | 1 | 1 | 5 | 6 | 2 | 6 | 2  |    |
| EAR | 3 | 2 | 4 | 5 | 3 | 2 | 5 | 5 | 4 | 4 | 1 | 1 | 3 | 1 | 5 | 5 | 2 | 1 | 1 | 1 | 6 | EM |   | 1 | 6 | 1 | 5 | 1 | 1 | EM | EM |
| EAR | 7 | 6 | 3 | 4 | 7 | 6 | 4 | 3 | 6 | 7 | 3 | 2 | 5 | 2 | 3 | 2 | 7 | 1 | 1 | 1 | 5 | 4  | 1 | 4 | 1 | 5 | 5 | 2 | 5 | 2  |    |
| EAR | 3 | 5 | 2 | 5 | 2 | 4 | 3 | 5 | 6 | 6 | 2 | 2 | 4 | 1 | 1 | 2 | 6 | 1 | 2 | 1 | 3 | 4  | 1 | 4 | 1 | 5 | 4 | 2 | 4 | 2  |    |
| EAR | 6 | 3 | 5 | 4 | 5 | 6 | 5 | 5 | 5 | 7 | 2 | 3 | 3 | 1 | 3 | 7 | 4 | 1 | 1 | 1 | 1 |    | 1 | 1 | 1 | 5 | 5 | 1 | 5 | 1  |    |
| EAR | 6 | 6 | 3 | 4 | 6 | 6 | 4 | 4 | 6 | 7 | 1 | 2 | 4 | 2 | 5 | 4 | 5 | 1 | 1 | 1 | 1 |    | 1 | 2 | 1 | 5 | 5 | 1 | 5 | 1  |    |
| EAR | 6 | 3 | 3 | 5 | 6 | 3 | 3 | 5 | 7 | 6 | 2 | 2 | 5 | 1 | 3 | 5 | 5 | 1 | 1 | 1 | 1 |    | 1 | 1 | 1 | 5 | 3 | 4 | 3 | 4  |    |
| EAR | 2 | 2 | 5 | 6 | 2 | 2 | 5 | 6 | 7 | 7 | 1 | 2 | 4 | 1 | 4 | 4 | 5 | 1 | 1 | 1 | 1 |    | 2 | 1 | 1 | 5 | 4 | 2 | 4 | 2  |    |
| EAR | 3 | 5 | 7 | 4 | 2 | 4 | 6 | 5 | 7 | 7 | 2 | 3 | 5 | 1 | 3 | 5 | 6 | 1 | 1 | 1 | 1 |    | 1 | 1 | 1 | 5 | 5 | 3 | 5 | 3  |    |



|     |   |   |   |   |   |   |   |   |   |   |   |   |   |   |   |   |   |   |   |   |   |    |   |   |   |   |   |   |    |    |
|-----|---|---|---|---|---|---|---|---|---|---|---|---|---|---|---|---|---|---|---|---|---|----|---|---|---|---|---|---|----|----|
| EAR | 3 | 3 | 4 | 5 | 5 | 5 | 4 | 4 | 7 | 7 | 4 | 4 | 6 | 1 | 5 | 7 | 4 | 1 | 1 | 1 | 3 | 3  | 2 | 2 | 1 | 5 | 4 | 3 | 4  | 3  |
| EAR | 5 | 5 | 3 | 3 | 5 | 5 | 3 | 3 | 7 | 7 | 3 | 6 | 7 | 1 | 2 | 5 | 7 | 1 | 1 | 1 | 1 |    | 2 | 1 | 1 | 2 | 5 | 2 | 5  | 2  |
| EAR | 3 | 5 | 4 | 5 | 5 | 2 | 4 | 5 | 6 | 2 | 2 | 2 | 5 | 2 | 7 | 7 | 5 | 1 | 1 | 1 | 3 | 3  | 2 | 4 | 1 | 5 | 4 | 3 | 4  | 3  |
| EAR | 2 | 2 | 7 | 7 | 2 | 2 | 7 | 7 | 7 | 7 | 2 | 2 | 4 | 5 | 6 | 7 | 3 | 1 | 1 | 1 | 1 |    | 2 | 1 | 1 | 5 | 4 | 3 | 4  | 3  |
| EAR | 3 | 3 | 4 | 4 | 2 | 3 | 5 | 5 | 5 | 5 | 2 | 2 | 5 | 3 | 3 | 3 | 3 | 1 | 1 | 1 | 1 |    | 2 | 1 | 1 | 2 | 5 | 3 | 5  | 3  |
| EAR | 2 | 5 | 5 | 5 | 6 | 5 | 3 | 3 | 6 | 6 | 1 | 2 | 4 | 1 | 2 | 2 | 6 | 1 | 1 | 1 | 1 |    | 1 | 1 | 2 | 6 | 5 | 2 | 5  | 2  |
| EAR | 3 | 3 | 5 | 6 | 4 | 4 | 4 | 4 | 5 | 6 | 4 | 5 | 4 | 4 | 4 | 4 | 5 | 1 | 2 | 2 | 1 |    | 1 | 1 | 1 | 6 | 5 | 1 | 5  | 1  |
| EAR | 3 | 5 | 4 | 4 | 3 | 4 | 4 | 5 | 7 | 7 | 2 | 4 | 4 | 1 | 3 | 6 | 5 | 1 | 3 | 2 | 1 |    | 2 | 1 | 1 | 5 | 7 | 1 | 7  | 1  |
| EAR | 4 | 3 | 6 | 4 | 5 | 4 | 6 | 5 | 7 | 7 | 5 | 5 | 6 | 1 | 4 | 5 | 5 | 1 | 2 | 2 | 1 |    | 2 | 1 | 1 | 5 | 8 | 1 | 8  | 1  |
| ECO | 4 | 4 | 3 | 6 | 4 | 4 | 2 | 4 | 7 | 7 | 4 | 3 | 4 | 2 | 2 | 5 | 6 | 1 | 2 | 1 | 1 |    | 1 | 1 | 1 | 5 | 2 | 3 | 2  | 3  |
| ECO | 2 | 5 | 4 | 4 | 3 | 3 | 5 | 5 | 7 | 7 | 4 | 3 | 4 | 2 | 2 | 6 | 4 | 1 | 1 | 2 | 1 |    | 2 | 1 | 1 | 5 | 6 | 2 | 6  | 2  |
| ECO | 4 | 6 | 2 | 3 | 6 | 6 | 2 | 2 | 6 | 7 | 2 | 2 | 2 | 1 | 2 | 5 | 6 | 1 | 1 | 2 | 5 | 2  | 1 | 5 | 1 | 5 | 5 | 3 | 5  | 3  |
| ECO | 3 | 6 | 2 | 4 | 5 | 6 | 2 | 4 | 6 | 6 | 4 | 4 | 4 | 5 | 5 | 5 | 4 | 1 | 1 | 2 | 5 | 3  | 1 | 6 | 1 | 5 | 5 | 3 | 5  | 3  |
| ECO | 6 | 5 | 3 | 2 | 4 | 6 | 1 | 2 | 5 | 7 | 2 | 2 | 3 | 2 | 2 | 2 | 6 | 1 | 1 | 2 | 1 |    | 1 | 2 | 1 | 5 | 4 | 2 | 4  | 2  |
| ECO | 4 | 4 | 4 | 4 | 4 | 4 | 4 | 4 | 5 | 5 | 2 | 2 | 3 | 1 | 4 | 2 | 2 | 1 | 1 | 2 | 1 |    | 1 | 1 | 1 | 5 | 7 | 1 | 7  | 1  |
| ECO | 2 | 2 | 5 | 5 | 2 | 2 | 5 | 5 | 6 | 6 | 3 | 4 | 4 | 1 | 5 | 5 | 4 | 1 | 1 | 2 | 1 |    | 1 | 1 | 2 | 5 | 5 | 2 | 5  | 2  |
| ECO | 4 | 4 | 6 | 5 | 4 | 4 | 6 | 5 | 7 | 7 | 7 | 7 | 4 | 3 | 6 | 1 | 7 | 1 | 3 | 1 | 1 |    | 1 | 1 | 2 | 5 | 3 | 3 | 3  | 3  |
| ECO | 6 | 5 | 1 | 3 | 5 | 6 | 2 | 5 | 5 | 5 | 3 | 3 | 3 | 1 | 2 | 3 | 5 | 1 | 1 | 2 | 1 |    | 1 | 2 | 1 | 5 | 4 | 2 | 4  | 2  |
| ECO | 5 | 4 | 4 | 5 | 5 | 4 | 3 | 5 | 4 | 4 | 4 | 4 | 3 | 1 | 1 | 7 | 2 | 1 | 1 | 2 | 1 |    | 2 | 1 | 1 | 5 | 2 | 8 | 2  | 8  |
| ECO | 5 | 5 | 2 | 6 | 5 | 4 | 3 | 5 | 4 | 6 | 4 | 4 | 4 | 5 | 5 | 5 | 4 | 1 | 1 | 2 | 1 |    | 1 | 1 | 1 | 5 | 4 | 1 | 4  | 1  |
| ECO | 5 | 5 | 1 | 4 | 5 | 5 | 1 | 5 | 6 | 7 | 4 | 2 | 4 | 1 | 3 | 6 | 6 | 1 | 1 | 2 | 5 | 2  | 1 | 6 | 1 | 5 | 5 | 2 | 5  | 2  |
| ECO | 3 | 5 | 3 | 5 | 3 | 5 | 4 | 5 | 6 | 6 | 2 | 1 | 4 | 3 | 4 | 5 | 3 | 1 | 2 | 1 | 1 |    | 2 | 1 | 2 | 5 | 3 | 3 | 3  | 3  |
| ECO | 2 | 2 | 7 | 5 | 4 | 5 | 3 | 5 | 6 | 7 | 5 | 6 | 3 | 1 | 3 | 4 | 2 | 1 | 1 | 2 | 2 |    | 1 | 2 | 1 | 3 | 3 | 4 | 3  | 4  |
| ECO | 6 | 4 | 4 | 5 | 4 | 7 | 4 | 5 | 6 | 5 | 4 | 2 | 5 | 1 | 6 | 6 | 2 | 1 | 2 | 2 | 1 |    | 2 | 1 | 1 | 5 | 1 | 5 | 1  | 5  |
| ECO | 4 | 3 | 6 | 6 | 3 | 4 | 6 | 5 | 6 | 7 | 7 | 6 | 5 | 1 | 4 | 1 | 4 | 1 | 2 | 2 | 3 | DK | 1 | 5 | 1 | 5 | 1 | 5 | 1  | 5  |
| ECO | 2 | 2 | 6 | 6 | 2 | 2 | 6 | 6 | 6 | 6 | 2 | 2 | 3 | 2 | 6 | 2 | 6 | 1 | 1 | 2 | 1 |    | 1 | 1 | 1 | 5 | 3 | 1 | 3  | 1  |
| ECO | 2 | 5 | 1 | 5 | 5 | 5 | 2 | 5 | 7 | 7 | 3 | 4 | 6 | 4 | 4 | 4 | 4 | 1 | 2 | 1 | 6 | EM | 1 | 6 | 1 | 5 | 4 | 2 | EM | EM |
| ECO | 5 | 5 | 4 | 4 | 6 | 6 | 3 | 3 | 7 | 7 | 5 | 2 | 4 | 1 | 1 | 2 | 6 | 1 | 1 | 1 | 1 |    | 1 | 1 | 1 | 5 | 3 | 2 | 3  | 2  |
| ECO | 5 | 4 | 3 | 5 | 5 | 4 | 3 | 5 | 6 | 7 | 5 | 4 | 3 | 2 | 3 | 5 | 4 | 1 | 1 | 2 | 1 |    | 1 | 1 | 1 | 5 | 7 | 1 | 7  | 1  |
| ECO | 6 | 6 | 1 | 5 | 6 | 5 | 1 | 6 | 6 | 6 | 3 | 2 | 4 | 1 | 2 | 4 | 4 | 1 | 1 | 2 | 1 |    | 1 | 2 | 1 | 5 | 7 | 1 | 7  | 1  |
| ECO | 6 | 3 | 2 | 6 | 5 | 4 | 2 | 6 | 7 | 7 | 4 | 3 | 3 | 1 | 1 | 1 | 7 | 1 | 1 | 2 | 1 |    | 1 | 2 | 2 | 5 | 8 | 1 | 8  | 1  |
| ECO | 3 | 5 | 1 | 1 | 1 | 3 | 5 | 1 | 3 | 5 | 3 | 2 | 3 | 1 | 3 | 6 | 3 | 1 | 1 | 2 | 1 |    | 2 | 2 | 1 | 5 | 2 | 4 | 2  | 4  |

|     |   |   |   |   |   |   |   |   |   |   |   |   |   |   |   |   |   |   |   |   |   |    |   |   |   |   |   |   |   |   |
|-----|---|---|---|---|---|---|---|---|---|---|---|---|---|---|---|---|---|---|---|---|---|----|---|---|---|---|---|---|---|---|
| ECO | 7 | 7 | 1 | 1 | 7 | 7 | 1 | 2 | 7 | 7 | 2 | 3 | 4 | 2 | 2 | 2 | 6 | 1 | 1 | 2 | 1 | 1  | 2 | 1 | 5 | 4 | 2 | 4 | 2 |   |
| ECO | 6 | 6 | 1 | 1 | 5 | 5 | 2 | 2 | 7 | 7 | 5 | 3 | 3 | 1 | 3 | 3 | 4 | 1 | 1 | 2 | 5 | 1  | 1 | 5 | 1 | 5 | 5 | 2 | 5 | 2 |
| ECO | 4 | 3 | 1 | 1 | 4 | 4 | 2 | 2 | 7 | 7 | 1 | 2 | 2 | 1 | 1 | 1 | 3 | 1 | 1 | 2 | 1 | 1  | 1 | 2 | 5 | 7 | 1 | 7 | 1 |   |
| ECO | 4 | 4 | 4 | 6 | 5 | 6 | 5 | 2 | 7 | 7 | 2 | 3 | 3 | 1 | 2 | 4 | 3 | 1 | 1 | 2 | 1 | 1  | 1 | 1 | 5 | 7 | 1 | 7 | 1 |   |
| ECO | 7 | 2 | 2 | 4 | 7 | 5 | 2 | 4 | 6 | 6 | 4 | 2 | 2 | 1 | 1 | 5 | 3 | 1 | 1 | 2 | 1 | 1  | 2 | 1 | 5 | 3 | 3 | 3 | 3 |   |
| ECO | 1 | 1 | 3 | 1 | 2 | 2 | 6 | 5 | 5 | 5 | 2 | 5 | 3 | 1 | 3 | 7 | 1 | 1 | 1 | 2 | 1 | 2  | 1 | 2 | 5 | 1 | 4 | 1 | 4 |   |
| ECO | 3 | 4 | 4 | 4 | 2 | 3 | 3 | 4 | 7 | 7 | 6 | 2 | 2 | 4 | 4 | 5 | 2 | 1 | 1 | 2 | 1 | 1  | 1 | 1 | 5 | 5 | 3 | 5 | 3 |   |
| ECO | 5 | 5 | 7 | 5 | 5 | 6 | 7 | 5 | 7 | 7 | 3 | 4 | 4 | 1 | 5 | 5 | 7 | 1 | 1 | 2 | 1 | 1  | 1 | 1 | 7 | 8 | 3 | 8 | 3 |   |
| ECO | 6 | 5 | 1 | 4 | 5 | 5 | 1 | 4 | 3 | 2 | 2 | 2 | 3 | 1 | 3 | 4 | 4 | 1 | 1 | 2 | 1 | 1  | 2 | 2 | 5 | 4 | 2 | 4 | 2 |   |
| ECO | 6 | 5 | 4 | 5 | 6 | 5 | 4 | 5 | 6 | 5 | 4 | 2 | 5 | 2 | 3 | 4 | 5 | 1 | 1 | 2 | 3 | 1  | 1 | 3 | 1 | 5 | 3 | 4 | 3 | 4 |
| ECO | 5 | 3 | 1 | 3 | 6 | 3 | 1 | 3 | 7 | 7 | 2 | 5 | 2 | 1 | 2 | 3 | 5 | 1 | 1 | 2 | 1 | 1  | 1 | 1 | 5 | 8 | 1 | 8 | 1 |   |
| ECO | 7 | 7 | 1 | 4 | 7 | 7 | 1 | 4 | 7 | 7 | 2 | 3 | 3 | 3 | 2 | 2 | 6 | 1 | 2 | 2 | 5 | 2  | 1 | 5 | 1 | 5 | 2 | 3 | 2 | 3 |
| ECO | 5 | 7 | 2 | 3 | 6 | 6 | 2 | 3 | 6 | 6 | 2 | 2 | 3 | 1 | 1 | 1 | 5 | 1 | 3 | 2 | 5 | DK | 1 | 3 | 1 | 5 | 4 | 1 | 4 | 1 |
| ECO | 2 | 2 | 4 | 5 | 1 | 1 | 4 | 5 | 6 | 7 | 2 | 2 | 3 | 1 | 3 | 7 | 5 | 1 | 1 | 2 | 1 | 2  | 2 | 1 | 5 | 6 | 2 | 6 | 2 |   |
| ECO | 6 | 6 | 2 | 6 | 3 | 3 | 6 | 3 | 6 | 7 | 6 | 5 | 3 | 4 | 4 | 2 | 6 | 1 | 2 | 2 | 1 | 1  | 1 | 1 | 5 | 6 | 1 | 6 | 1 |   |
| ECO | 5 | 5 | 2 | 2 | 5 | 4 | 1 | 4 | 5 | 6 | 4 | 2 | 4 | 2 | 5 | 5 | 4 | 1 | 2 | 1 | 4 | 2  | 2 | 2 | 1 | 5 | 2 | 5 | 2 | 5 |
| ECO | 6 | 5 | 3 | 7 | 6 | 3 | 3 | 6 | 5 | 5 | 1 | 1 | 3 | 1 | 2 | 2 | 6 | 1 | 4 | 3 | 6 | AD | 1 | 4 | 1 | 2 | 5 | 2 | 5 | 2 |
| ECO | 2 | 6 | 1 | 2 | 2 | 6 | 1 | 3 | 7 | 7 | 6 | 7 | 4 | 1 | 5 | 7 | 1 | 1 | 3 | 2 | 5 | 2  | 2 | 3 | 2 | 5 | 4 | 2 | 4 | 2 |
| ECO | 2 | 7 | 1 | 5 | 7 | 6 | 6 | 5 | 7 | 6 | 2 | 1 | 4 | 1 | 3 | 4 | 4 | 1 | 2 | 2 | 6 | DO | 2 | 2 | 1 | 5 | 4 | 2 | 4 | 2 |
| ECO | 1 | 5 | 5 | 6 | 6 | 6 | 2 | 5 | 5 | 6 | 6 | 4 | 2 | 1 | 2 | 1 | 7 | 1 | 1 | 2 | 1 | 1  | 1 | 2 | 5 | 2 | 6 | 2 | 6 |   |
| ECO | 5 | 3 | 5 | 5 | 2 | 3 | 3 | 4 | 6 | 6 | 3 | 4 | 3 | 1 | 1 | 1 | 3 | 1 | 1 | 2 | 1 | 1  | 1 | 1 | 5 | 4 | 3 | 4 | 3 |   |
| ECO | 7 | 7 | 1 | 2 | 7 | 6 | 1 | 4 | 7 | 7 | 5 | 2 | 3 | 3 | 2 | 2 | 6 | 1 | 1 | 2 | 1 | 1  | 2 | 1 | 5 | 4 | 2 | 4 | 2 |   |
| ECO | 3 | 3 | 5 | 5 | 3 | 3 | 5 | 5 | 5 | 5 | 4 | 4 | 3 | 2 | 2 | 2 | 6 | 1 | 1 | 2 | 1 | 1  | 1 | 1 | 5 | 3 | 3 | 3 | 3 |   |
| ECO | 4 | 5 | 3 | 4 | 3 | 4 | 2 | 4 | 5 | 5 | 4 | 4 | 3 | 2 | 3 | 4 | 4 | 1 | 1 | 2 | 5 | 1  | 1 | 4 | 1 | 5 | 2 | 4 | 2 | 4 |
| ECO | 4 | 4 | 1 | 3 | 1 | 4 | 2 | 5 | 7 | 7 | 4 | 4 | 3 | 1 | 1 | 1 | 7 | 1 | 1 | 2 | 1 | 1  | 2 | 2 | 5 | 6 | 1 | 6 | 1 |   |
| ECO | 3 | 2 | 5 | 6 | 3 | 2 | 5 | 6 | 6 | 6 | 3 | 3 | 2 | 2 | 3 | 5 | 3 | 1 | 1 | 2 | 1 | 1  | 2 | 1 | 5 | 4 | 2 | 4 | 2 |   |
| ECO | 5 | 3 | 3 | 3 | 3 | 3 | 3 | 5 | 2 | 5 | 4 | 3 | 3 | 1 | 1 | 1 | 6 | 1 | 1 | 1 | 1 | 1  | 1 | 1 | 6 | 1 | 6 | 1 |   |   |
| ECO | 5 | 5 | 2 | 3 | 5 | 5 | 3 | 3 | 6 | 6 | 4 | 4 | 4 | 3 | 5 | 5 | 4 | 1 | 1 | 1 | 3 | 3  | 2 | 5 | 1 | 5 | 4 | 2 | 4 | 2 |
| ECO | 2 | 2 | 4 | 6 | 3 | 3 | 5 | 5 | 5 | 5 | 1 | 2 | 4 | 1 | 5 | 5 | 3 | 1 | 2 | 1 | 1 | 1  | 1 | 2 | 1 | 5 | 4 | 2 | 4 | 2 |
| ECO | 4 | 4 | 4 | 4 | 4 | 4 | 4 | 4 | 6 | 6 | 2 | 1 | 3 | 1 | 4 | 4 | 4 | 1 | 1 | 1 | 4 | 2  | 1 | 2 | 1 | 5 | 4 | 1 | 4 | 1 |
| ECO | 4 | 4 | 7 | 7 | 5 | 5 | 7 | 7 | 7 | 7 | 3 | 3 | 4 | 1 | 1 | 5 | 4 | 1 | 1 | 1 | 1 | 1  | 1 | 1 | 5 | 5 | 2 | 5 | 2 |   |
| ECO | 5 | 3 | 3 | 5 | 5 | 5 | 3 | 3 | 7 | 6 | 5 | 2 | 5 | 2 | 4 | 7 | 3 | 1 | 2 | 1 | 5 | 3  | 1 | 5 | 1 | 5 | 5 | 2 | 5 | 2 |

|     |   |   |   |   |   |   |   |   |   |   |   |   |   |   |   |   |   |   |   |   |   |    |   |   |   |   |   |   |    |    |
|-----|---|---|---|---|---|---|---|---|---|---|---|---|---|---|---|---|---|---|---|---|---|----|---|---|---|---|---|---|----|----|
| ECO | 3 | 4 | 3 | 6 | 5 | 3 | 3 | 6 | 3 | 5 | 6 | 5 | 4 | 3 | 3 | 2 | 6 | 1 | 3 | 2 | 1 | 1  | 1 | 1 | 5 | 6 | 1 | 6 | 1  |    |
| ECO | 5 | 6 | 7 | 3 | 1 | 4 | 3 | 5 | 7 | 6 | 6 | 3 | 4 | 1 | 2 | 5 | 6 | 1 | 1 | 1 | 1 | 1  | 1 | 1 | 2 | 5 | 1 | 5 | 1  |    |
| ECO | 5 | 4 | 2 | 5 | 6 | 6 | 3 | 5 | 5 | 5 | 4 | 2 | 4 | 3 | 5 | 5 | 3 | 1 | 1 | 1 | 3 | 1  | 2 | 1 | 5 | 5 | 1 | 5 | 1  |    |
| ECO | 4 | 3 | 4 | 5 | 3 | 3 | 4 | 5 | 6 | 6 | 6 | 5 | 4 | 2 | 3 | 6 | 5 | 1 | 2 | 1 | 1 | 1  | 2 | 1 | 6 | 2 | 3 | 2 | 3  |    |
| ECO | 6 | 6 | 6 | 6 | 6 | 6 | 6 | 6 | 6 | 6 | 6 | 4 | 3 | 5 | 5 | 2 | 7 | 1 | 2 | 1 | 6 | EM | 1 | 6 | 1 | 5 | 1 | 2 | EM | EM |
| ECO | 3 | 6 | 2 | 6 | 5 | 5 | 2 | 2 | 7 | 7 | 3 | 2 | 3 | 4 | 2 | 6 | 5 | 1 | 2 | 2 | 3 | 3  | 2 | 3 | 1 | 5 | 3 | 2 | 3  | 2  |
| ECO | 4 | 3 | 3 | 6 |   |   |   |   | 7 | 7 | 4 | 2 | 3 | 1 | 5 | 6 | 3 | 1 | 1 | 1 | 5 | 1  | 1 | 5 | 1 | 5 | 3 | 4 | 3  | 4  |
| ECO | 7 | 4 | 4 | 4 | 4 | 4 | 4 | 4 | 7 | 7 | 7 | 7 | 3 | 1 | 5 | 5 | 4 | 1 | 1 | 1 | 6 | EM | 1 | 6 | 1 | 5 | 1 | 7 | EM | EM |
| ECO | 2 | 4 | 2 | 2 | 5 | 4 | 4 | 2 | 6 | 6 | 2 | 2 | 3 | 2 | 4 | 5 | 2 | 1 | 1 | 1 | 1 | 1  | 2 | 2 | 1 | 5 | 3 | 2 | 3  | 2  |
| ECO | 5 | 6 | 1 | 2 | 6 | 3 | 1 | 6 | 5 | 6 | 4 | 2 | 2 | 1 | 5 | 1 | 2 | 1 | 1 | 1 | 1 | 1  | 1 | 1 | 5 | 4 | 2 | 4 | 2  |    |
| ECO | 3 | 5 | 1 | 6 | 2 | 2 | 6 | 6 | 7 | 7 | 7 | 4 | 2 | 1 | 4 | 6 | 2 | 1 | 1 | 1 | 1 | 1  | 2 | 1 | 7 | 4 | 2 | 4 | 2  |    |
| ECO | 3 | 4 | 5 | 5 | 5 | 5 | 4 | 5 | 7 | 7 | 4 | 4 | 3 | 1 | 4 | 5 | 4 | 1 | 1 | 1 | 1 | 1  | 2 | 1 | 5 | 1 | 3 | 1 | 3  |    |
| ECO | 6 | 4 | 2 | 5 | 6 | 6 | 2 | 2 | 7 | 5 | 1 | 2 | 4 | 1 | 4 | 7 | 5 | 1 | 1 | 1 | 1 | 1  | 2 | 1 | 5 | 6 | 2 | 6 | 2  |    |
| ECO | 5 | 6 | 1 | 2 | 6 | 7 | 2 | 3 | 7 | 7 | 4 | 1 | 3 | 1 | 1 | 5 | 3 | 1 | 1 | 1 | 1 | 1  | 1 | 1 | 5 | 1 | 4 | 1 | 4  |    |
| ECO | 3 | 5 | 1 | 4 | 6 | 6 | 1 | 6 | 6 | 6 | 2 | 2 | 3 | 1 | 2 | 2 | 6 | 1 | 1 | 1 | 1 | 1  | 2 | 1 | 5 | 2 | 5 | 2 | 5  |    |
| ECO | 7 | 4 | 1 | 4 | 5 | 2 | 2 | 6 | 7 | 7 | 1 | 1 | 3 | 1 | 1 | 7 | 1 | 2 | 1 | 5 | 1 | 1  | 5 | 1 | 5 | 3 | 3 | 3 | 3  |    |
| ECO | 1 | 3 | 7 | 7 | 5 | 7 | 2 | 1 | 7 | 7 | 4 | 2 | 4 | 1 | 4 | 6 | 4 | 1 | 3 | 1 | 1 | 1  | 1 | 1 | 5 | 4 | 5 | 4 | 5  |    |
| ECO | 2 | 2 | 6 | 5 | 2 | 2 | 6 | 5 | 7 | 7 | 6 | 3 | 3 | 1 | 3 | 3 | 7 | 1 | 1 | 1 | 1 | 1  | 1 | 2 | 5 | 5 | 2 | 5 | 2  |    |
| ECO | 7 | 4 | 3 | 4 | 4 | 4 | 4 | 5 | 6 | 6 | 3 | 2 | 4 | 2 | 3 | 4 | 3 | 1 | 1 | 1 | 3 | 6  | 1 | 4 | 1 | 5 | 5 | 3 | 5  | 3  |
| ECO | 4 | 5 | 2 | 3 | 5 | 6 | 1 | 4 | 7 | 7 | 3 | 2 | 4 | 2 | 4 | 6 | 5 | 1 | 3 | 1 | 6 | EM | 1 | 6 | 1 | 5 | 1 | 4 | EM | EM |
| ECO | 7 | 7 | 1 | 5 | 4 | 4 | 4 | 4 | 7 | 7 | 3 | 2 | 3 | 1 | 4 | 3 | 3 | 1 | 1 | 1 | 5 | 2  | 1 | 5 | 1 | 5 | 4 | 2 | 4  | 2  |
| ECO | 5 | 5 | 4 | 5 | 3 | 5 | 4 | 4 | 6 | 6 | 4 | 4 | 4 | 2 | 4 | 6 | 4 | 1 | 2 | 1 | 5 | 2  | 1 | 5 | 1 | 5 | 2 | 4 | 2  | 4  |
| ECO | 1 | 1 | 1 | 1 | 4 | 4 | 4 | 4 | 5 | 5 | 1 | 2 | 2 | 1 | 1 | 2 | 1 | 1 | 1 | 1 | 4 | 1  | 1 | 2 | 1 | 5 | 7 | 1 | 7  | 1  |
| ECO | 6 | 5 | 4 | 4 | 6 | 5 | 6 | 3 | 6 | 7 | 5 | 6 | 4 | 1 | 5 | 6 | 5 | 1 | 2 | 1 | 1 | 1  | 1 | 2 | 5 | 1 | 5 | 1 | 5  | 1  |
| ECO | 1 | 2 | 4 | 5 | 3 | 5 | 3 | 5 | 6 | 4 | 3 | 3 | 3 | 1 | 6 | 5 | 3 | 1 | 1 | 1 | 1 | 1  | 1 | 1 | 5 | 3 | 2 | 3 | 2  |    |
| ECO | 6 | 6 | 1 | 2 | 6 | 6 | 1 | 4 | 5 | 7 | 3 | 2 | 3 | 2 | 5 | 5 | 3 | 1 | 1 | 1 | 1 | 1  | 1 | 1 | 5 | 3 | 3 | 3 | 3  |    |
| ECO | 6 | 6 | 2 | 2 | 6 | 2 | 6 | 2 | 6 | 6 | 3 | 4 | 2 | 4 | 4 | 4 | 5 | 1 | 1 | 2 | 5 | 2  | 1 | 6 | 1 | 5 | 3 | 5 | 3  | 5  |
| ECO | 6 | 6 | 1 | 2 | 5 | 6 | 1 | 2 | 7 | 7 | 4 | 1 | 3 | 2 | 5 | 5 | 3 | 1 | 1 | 2 | 3 | 3  | 1 | 2 | 1 | 5 | 2 | 4 | 2  | 4  |
| ECO | 6 | 5 | 3 | 4 | 6 | 7 | 3 | 3 | 6 | 7 | 2 | 2 | 2 | 2 | 3 | 5 | 6 | 1 | 1 | 2 | 3 | 3  | 1 | 2 | 2 | 5 | 5 | 2 | 5  | 2  |
| ECO | 4 | 4 | 4 | 4 | 5 | 6 | 4 | 5 | 7 | 5 | 2 | 2 | 2 | 2 | 4 | 6 | 3 | 1 | 1 | 2 | 1 | 1  | 1 | 1 | 5 | 4 | 1 | 4 | 1  |    |
| EDU | 1 | 3 | 2 | 4 |   |   |   |   | 7 | 7 | 3 | 2 | 5 | 1 | 1 | 2 | 6 | 1 | 2 | 1 | 5 | 6  | 1 | 4 | 1 | 5 | 1 | 5 | 1  | 5  |
| EDU | 4 | 3 | 7 | 5 | 6 | 6 | 7 | 6 | 6 | 6 | 5 | 1 | 6 | 1 | 1 | 1 | 7 | 1 | 1 | 1 | 5 | 3  | 2 | 3 | 1 | 3 | 2 | 8 | 2  | 8  |

|     |   |   |   |   |   |   |   |   |   |   |   |   |   |   |   |   |   |   |    |   |   |    |   |   |   |   |   |   |   |    |    |
|-----|---|---|---|---|---|---|---|---|---|---|---|---|---|---|---|---|---|---|----|---|---|----|---|---|---|---|---|---|---|----|----|
| EDU | 2 | 2 | 2 | 6 | 1 | 2 | 5 | 7 | 3 | 3 | 2 | 4 | 6 | 2 | 6 | 1 | 7 | 1 | 1  | 1 | 3 | DK | 1 | 5 | 1 | 5 | 1 | 2 | 1 | 2  |    |
| EDU | 5 | 5 | 3 | 4 | 4 | 4 | 4 | 4 | 7 | 7 | 5 | 5 | 7 | 1 | 2 | 5 | 5 | 1 | 1  | 1 | 4 | 3  | 1 | 2 | 1 | 5 | 5 | 2 | 5 | 2  |    |
| EDU | 2 | 2 | 4 | 3 | 5 | 5 | 6 | 5 | 2 | 5 | 6 | 4 | 4 | 1 | 4 | 7 | 4 | 1 | 2  | 1 | 2 |    | 2 | 2 | 1 | 5 | 4 | 2 | 4 | 2  |    |
| EDU | 1 | 5 | 5 | 7 | 6 | 6 | 4 | 4 | 5 | 7 | 5 | 3 | 8 | 1 | 1 | 3 | 7 | 1 | 1  | 2 | 5 | 1  | 1 | 3 | 1 | 2 | 3 | 2 | 3 | 2  |    |
| EDU | 2 | 2 | 2 | 3 | 1 | 3 | 2 | 3 | 5 | 7 | 7 | 7 | 8 | 1 | 3 | 1 | 7 | 1 | 1  | 2 | 1 |    | 2 | 1 | 1 | 5 | 6 | 2 | 6 | 2  |    |
| EDU | 2 | 1 | 7 | 7 | 6 | 4 | 4 | 2 | 7 | 7 | 5 | 1 | 8 | 1 | 1 | 1 | 7 | 1 | 1  | 2 | 4 | 3  | 2 | 2 | 1 | 3 | 5 | 2 | 5 | 2  |    |
| EDU | 1 | 1 | 6 | 6 | 1 | 1 | 6 | 6 | 6 | 6 | 5 | 5 | 5 | 1 | 4 | 7 | 7 | 1 | 1  | 2 | 1 |    | 1 | 1 | 1 | 3 | 2 | 3 | 2 | 3  |    |
| EDU | 1 | 1 | 4 | 1 | 2 | 2 | 4 | 2 | 7 | 7 | 7 | 7 | 7 | 1 | 2 | 1 | 7 | 1 | 1  | 1 | 3 | DK | 2 | 3 | 1 | 5 | 4 | 2 | 4 | 2  |    |
| EDU | 2 | 2 | 6 | 6 | 3 | 3 | 4 | 4 | 6 | 6 | 4 | 4 | 6 | 1 | 1 | 6 | 7 | 1 | 1  | 1 | 5 | 6  | 1 | 3 | 1 | 6 | 2 | 5 | 2 | 5  |    |
| EDU | 6 | 5 | 1 | 3 | 5 | 5 | 2 | 3 | 5 | 6 | 5 | 2 | 8 | 2 | 2 | 3 | 5 | 1 | 2  | 1 | 6 | EM |   | 1 | 6 | 1 | 5 | 3 | 4 | EM | EM |
| EDU | 5 | 3 | 7 | 7 | 5 | 2 | 6 | 7 | 6 | 7 | 6 | 6 | 8 | 1 | 5 | 5 | 6 | 1 | 1  | 2 | 1 |    | 1 | 1 | 1 | 5 | 6 | 2 | 6 | 2  |    |
| EDU | 4 | 4 | 5 | 5 | 5 | 5 | 4 | 4 | 6 | 6 | 7 | 7 | 7 | 4 | 3 | 3 | 6 | 1 | DK | 2 | 1 |    | 1 | 3 | 1 | 3 | 2 | 2 | 2 | 2  |    |
| EDU | 4 | 3 | 6 | 6 | 6 | 4 | 4 | 5 | 5 | 7 | 5 | 5 | 4 | 1 | 5 | 7 | 4 | 1 | 1  | 1 | 3 | 2  | 1 | 4 | 1 | 5 | 3 | 4 | 3 | 4  |    |
| EDU | 6 | 6 | 3 | 3 | 2 | 2 | 6 | 6 | 6 | 5 | 3 | 2 | 4 | 1 | 6 | 7 | 4 | 1 | DK | 2 | 1 |    | 2 | 2 | 1 | 3 | 1 | 6 | 1 | 6  |    |
| EDU | 2 | 3 | 2 | 5 | 3 | 4 | 2 | 4 | 5 | 7 | 3 | 2 | 5 | 1 | 1 | 2 | 6 | 1 | 1  | 2 | 5 | 2  | 1 | 4 | 1 | 3 | 3 | 4 | 3 | 4  |    |
| EDU | 2 | 2 | 6 | 4 | 2 | 1 | 5 | 5 | 7 | 6 | 6 | 6 | 7 | 1 | 4 | 7 | 5 | 1 | 1  | 2 | 1 |    | 2 | 1 | 1 | 3 | 4 | 5 | 4 | 5  |    |
| EDU | 3 | 3 | 5 | 5 | 2 | 3 | 5 | 5 | 6 | 6 | 3 | 5 | 7 | 1 | 1 | 2 | 7 | 1 | 2  | 1 | 1 |    | 2 | 1 | 1 | 5 | 2 | 3 | 2 | 3  |    |
| EDU | 1 | 2 | 6 | 7 | 4 | 5 | 3 | 5 | 6 | 5 | 5 | 6 | 7 | 1 | 2 | 2 | 7 | 1 | 1  | 1 | 1 |    | 2 | 2 | 1 | 5 | 4 | 2 | 4 | 2  |    |
| EDU | 2 | 2 | 6 | 6 | 2 | 2 | 6 | 6 | 5 | 5 | 4 | 4 | 5 | 1 | 6 | 5 | 6 | 1 | 1  | 1 | 5 | 1  |   | 1 | 3 | 1 | 5 | 5 | 2 | 5  | 2  |
| EDU | 2 | 1 | 5 | 7 | 2 | 3 | 5 | 5 | 5 | 5 | 5 | 5 | 8 | 1 | 3 | 4 | 5 | 1 | 1  | 1 | 1 |    | 2 | 1 | 1 | 5 | 4 | 2 | 4 | 2  |    |
| EDU | 4 | 4 | 4 | 4 | 4 | 4 | 4 | 4 | 7 | 7 | 4 | 4 | 8 | 1 | 4 | 7 | 7 | 1 | 1  | 1 | 1 |    | 2 | 2 | 1 | 5 | 1 | 8 | 1 | 8  |    |
| EDU | 1 | 1 | 7 | 7 | 2 | 2 | 5 | 6 | 7 | 7 | 6 | 6 | 7 | 1 | 3 | 3 | 6 | 1 | 1  | 1 | 1 |    | 2 | 1 | 1 | 5 | 3 | 2 | 3 | 2  |    |
| EDU | 2 | 2 | 6 | 6 | 1 | 1 | 6 | 6 | 4 | 7 | 6 | 6 | 7 | 1 | 1 | 2 | 7 | 1 | 1  | 1 | 1 |    | 1 | 1 | 1 | 2 | 2 | 2 | 2 | 2  |    |
| EDU | 2 | 3 | 5 | 5 | 3 | 3 | 5 | 5 | 6 | 6 | 6 | 6 | 6 | 1 | 3 | 5 | 6 | 1 | 1  | 1 | 4 | 3  |   | 2 | 1 | 2 | 6 | 2 | 4 | 2  | 4  |
| EDU | 2 | 2 | 5 | 6 | 4 | 4 | 4 | 4 | 5 | 5 | 6 | 5 | 6 | 1 | 2 | 5 | 5 | 1 | 1  | 1 | 1 |    | 1 | 2 | 1 | 5 | 3 | 3 | 3 | 3  |    |
| EDU | 5 | 4 | 5 | 5 | 4 | 4 | 4 | 4 | 6 | 6 | 6 | 6 | 8 | 1 | 2 | 2 | 7 | 1 | 1  | 1 | 5 | 2  |   | 1 | 5 | 1 | 5 | 4 | 3 | 4  | 3  |
| EDU | 1 | 2 | 7 | 6 | 1 | 2 | 6 | 5 | 6 | 6 | 5 | 3 | 7 | 3 | 4 | 4 | 7 | 1 | 1  | 1 | 1 |    | 1 | 2 | 2 | 6 | 1 | 5 | 1 | 5  |    |
| EDU | 3 | 5 | 5 | 5 | 2 | 2 | 7 | 6 | 4 | 7 | 6 | 4 | 7 | 1 | 1 | 4 | 7 | 1 | 1  | 1 | 1 |    | 2 | 1 | 1 | 2 | 5 | 2 | 5 | 2  |    |
| EDU | 2 | 2 | 6 | 5 | 1 | 3 | 3 | 5 | 5 | 7 | 7 | 5 | 8 | 1 | 2 | 5 | 7 | 1 | 1  | 1 | 1 |    | 2 | 2 | 1 | 2 | 1 | 5 | 1 | 5  |    |
| EDU | 2 | 1 | 2 | 2 | 3 | 2 | 2 | 2 | 7 | 7 | 7 | 4 | 8 | 1 | 1 | 4 | 6 | 1 | 1  | 1 | 1 |    | 2 | 2 | 1 | 5 | 6 | 3 | 6 | 3  |    |
| EDU | 3 | 6 | 3 | 6 | 2 | 2 | 6 | 6 | 6 | 6 | 6 | 6 | 7 | 1 | 2 | 7 | 3 | 1 | 1  | 1 | 1 |    | 2 | 1 | 1 | 5 | 1 | 2 | 1 | 2  |    |
| EDU | 4 | 4 | 4 | 4 | 5 | 3 | 5 | 4 | 5 | 5 | 5 | 5 | 6 | 3 | 4 | 4 | 5 | 1 | 1  | 1 | 3 | 5  |   | 2 | 3 | 1 | 2 | 4 | 4 | 4  | 4  |

|     |   |   |   |   |   |   |   |   |   |   |   |   |   |   |   |   |   |   |   |   |    |    |   |   |   |   |   |   |   |    |    |
|-----|---|---|---|---|---|---|---|---|---|---|---|---|---|---|---|---|---|---|---|---|----|----|---|---|---|---|---|---|---|----|----|
| EDU | 4 | 4 | 5 | 6 | 5 | 4 | 5 | 5 | 6 | 7 | 3 | 5 | 8 | 1 | 1 | 4 | 7 | 1 | 1 | 1 | 3  | DK | 2 | 3 | 1 | 5 | 3 | 3 | 3 | 3  |    |
| EDU | 5 | 4 | 3 | 3 | 3 | 3 | 4 | 4 | 5 | 6 | 6 | 5 | 7 | 1 | 4 | 1 | 7 | 1 | 1 | 1 | 5  | 2  | 1 | 5 | 1 | 5 | 4 | 4 | 4 | 4  |    |
| EDU | 3 | 3 | 4 | 4 | 4 | 4 | 3 | 4 | 7 | 6 | 6 | 5 | 9 | 1 | 1 | 5 | 7 | 1 | 1 | 1 | 1  |    | 1 | 2 | 1 | 2 | 4 | 4 | 4 | 4  |    |
| EDU | 2 | 4 | 5 | 4 | 3 | 2 | 5 | 5 | 4 | 6 | 6 | 5 | 7 | 1 | 1 | 4 | 5 | 1 | 1 | 1 | 5  | 4  | 2 | 4 | 1 | 5 | 4 | 3 | 4 | 3  |    |
| EDU | 4 | 5 | 5 | 5 | 5 | 5 | 5 | 5 | 6 | 5 | 5 | 6 | 8 | 4 | 4 | 3 | 6 | 1 | 1 | 1 | 1  |    | 1 | 1 | 1 | 5 | 3 | 3 | 3 | 3  |    |
| EDU | 4 | 4 | 4 | 4 | 4 | 4 | 4 | 4 | 7 | 7 | 4 | 4 | 6 | 1 | 1 | 2 | 7 | 1 | 1 | 1 | 4  | 3  | 1 | 3 | 1 | 5 | 4 | 3 | 4 | 3  |    |
| EDU | 2 | 2 | 5 | 6 | 4 | 4 | 4 | 4 | 7 | 7 | 6 | 5 | 8 | 2 | 2 | 2 | 7 | 1 | 1 | 1 | 1  |    | 2 | 2 | 1 | 5 | 5 | 3 | 5 | 3  |    |
| EDU | 1 | 2 | 5 | 7 | 3 | 3 | 1 | 5 | 6 | 7 | 5 | 5 | 9 | 1 | 4 | 3 | 6 | 1 | 1 | 1 | 1  |    | 2 | 2 | 1 | 5 | 5 | 2 | 5 | 2  |    |
| EDU | 5 | 5 | 4 | 5 | 4 | 5 | 5 | 5 | 5 | 6 | 3 | 2 | 7 | 1 | 1 | 3 | 6 | 1 | 1 | 1 | 1  |    | 1 | 2 | 1 | 5 | 3 | 5 | 3 | 5  |    |
| EDU | 3 | 5 | 2 | 5 | 4 | 4 | 4 | 4 | 7 | 7 | 5 | 5 | 6 | 2 | 4 | 6 | 6 | 1 | 1 | 1 | 1  |    | 1 | 2 | 1 | 5 | 1 | 5 | 1 | 5  |    |
| EDU | 3 | 3 | 5 | 5 | 3 | 3 | 5 | 5 | 5 | 6 | 6 | 6 | 8 | 1 | 2 | 2 | 7 | 1 | 1 | 1 | 1  |    | 1 | 2 | 1 | 4 | 1 | 4 | 1 | 4  |    |
| EDU | 5 | 2 | 4 | 5 | 4 | 4 | 5 | 4 | 5 | 5 | 4 | 3 | 6 | 1 | 5 | 4 | 6 | 1 | 1 | 1 | 1  |    | 2 | 4 | 1 | 5 | 3 | 5 | 3 | 5  |    |
| EDU | 3 | 3 | 4 | 4 | 4 | 5 | 3 | 4 | 6 | 6 | 4 | 4 | 6 | 1 | 2 | 4 | 5 | 1 | 1 | 1 | 5  | 2  | 1 | 3 | 2 | 5 | 3 | 4 | 3 | 4  |    |
| EDU | 5 | 1 | 7 | 2 | 1 | 2 | 5 | 7 | 7 | 7 | 4 | 4 | 7 | 1 | 2 | 6 | 5 | 1 | 1 | 1 | 1  |    | 1 | 1 | 1 | 5 | 3 | 3 | 3 | 3  |    |
| EDU | 5 | 5 | 3 | 3 | 3 | 5 | 3 | 3 | 5 | 6 | 4 | 4 | 9 | 2 | 3 | 2 | 6 | 1 | 1 | 1 | 5  | 6  | 1 | 2 | 1 | 6 | 6 | 1 | 6 | 1  |    |
| EDU | 4 | 5 | 1 | 6 | 3 | 5 | 4 | 5 | 5 | 5 | 6 | 3 | 5 | 1 | 4 | 4 | 5 | 1 | 1 | 1 | 1  |    | 2 | 1 | 1 | 5 | 2 | 5 | 2 | 5  |    |
| EDU | 4 | 5 | 3 | 3 | 4 | 4 | 4 | 5 | 6 | 7 | 6 | 5 | 7 | 1 | 1 | 5 | 7 | 1 | 1 | 1 | 4  | 4  | 2 | 2 | 1 | 5 | 3 | 3 | 3 | 3  |    |
| EDU | 5 | 5 | 3 | 3 | 5 | 3 | 3 | 3 | 7 | 6 | 7 | 4 | 7 | 1 | 1 | 2 | 7 | 1 | 1 | 1 | 5  | 2  | 1 | 5 | 1 | 2 | 3 | 4 | 3 | 4  |    |
| EDU | 1 | 4 | 6 | 7 | 2 | 3 | 5 | 6 | 4 | 6 | 7 | 6 | 8 | 2 | 3 | 5 | 6 | 1 | 1 | 1 | 1  |    | 2 | 1 | 1 | 5 | 1 | 8 | 1 | 8  |    |
| EDU | 2 | 2 | 3 | 5 | 2 | 2 | 2 | 2 | 6 | 7 | 7 | 7 | 8 | 1 | 1 | 7 | 6 | 1 | 1 | 1 | 5  | 4  | 1 | 3 | 1 | 5 | 5 | 3 | 5 | 3  |    |
| EDU | 7 | 7 | 7 | 6 | 6 | 6 | 6 | 6 | 6 | 6 | 6 | 3 | 4 | 1 | 5 | 3 | 3 | 1 | 1 | 4 | R1 | 2  |   | 2 | 2 | 1 | 3 | 3 | 6 | 3  | 6  |
| EDU | 3 | 5 | 4 | 6 | 5 | 5 | 3 | 3 | 5 | 6 | 5 | 4 | 4 | 1 | 2 | 3 | 6 | 1 | 1 | 1 | 3  | DK | 1 | 3 | 1 | 5 | 3 | 3 | 3 | 3  |    |
| EDU | 3 | 2 | 5 | 5 | 2 | 5 | 7 | 5 | 5 | 6 | 7 | 7 | 3 | 1 | 3 | 6 | 7 | 1 | 1 | 2 | 1  |    | 2 | 1 | 1 | 5 | 1 | 5 | 1 | 5  |    |
| EDU | 2 | 2 | 6 | 6 | 3 | 3 | 6 | 6 | 6 | 6 | 6 | 6 | 8 | 1 | 2 | 3 | 7 | 1 | 1 | 2 | 1  |    | 1 | 2 | 1 | 5 | 3 | 3 | 3 | 3  |    |
| ENG | 5 | 6 | 2 | 2 | 2 | 6 | 2 | 2 | 7 | 7 | 4 | 4 | 2 | 4 | 5 | 5 | 5 | 1 | 1 | 1 | 6  | EM |   | 1 | 6 | 1 | 5 | 4 | 2 | EM | EM |
| ENG | 5 | 5 | 3 | 6 | 7 | 7 | 2 | 5 | 5 | 6 | 1 | 3 | 3 | 3 | 6 | 3 | 3 | 1 | 1 | 2 | 1  |    | 1 | 1 | 1 | 2 | 6 | 1 | 6 | 1  |    |
| ENG | 3 | 3 | 5 | 6 | 3 | 3 | 5 | 5 | 6 | 5 | 2 | 2 | 3 | 1 | 4 | 5 | 6 | 1 | 1 | 1 | 3  | DK | 1 | 4 | 1 | 5 | 6 | 2 | 6 | 2  |    |
| ENG | 5 | 6 | 2 | 2 | 5 | 6 | 2 | 3 | 6 | 7 | 5 | 3 | 2 | 1 | 5 | 6 | 5 | 1 | 1 | 1 | 6  | EM |   | 1 | 6 | 1 | 5 | 1 | 1 | EM | EM |
| ENG | 6 | 6 | 1 | 3 | 4 | 5 | 1 | 3 | 6 | 6 | 2 | 2 | 3 | 7 | 5 | 6 | 2 | 1 | 1 | 1 | 5  |    | 3 | 1 | 4 | 1 | 5 | 5 | 2 | 5  | 2  |
| ENG | 5 | 5 | 5 | 5 | 5 | 3 | 5 | 6 | 7 | 7 | 2 | 2 | 3 | 2 | 2 | 2 | 7 | 1 | 1 | 1 | 5  |    | 3 | 1 | 2 | 1 | 2 | 5 | 3 | 5  | 3  |
| ENG | 6 | 6 | 1 | 2 | 6 | 6 | 1 | 2 | 6 | 5 | 1 | 1 | 3 | 1 | 5 | 5 | 2 | 1 | 1 | 2 | 6  | EM |   | 1 | 6 | 1 | 5 | 2 | 4 | EM | EM |
| ENG | 6 | 5 | 1 | 3 | 6 | 2 | 1 | 4 | 7 | 7 | 2 | 2 | 2 | 1 | 4 | 7 | 1 | 1 | 1 | 2 | 3  |    | 2 | 1 | 4 | 1 | 5 | 5 | 3 | 5  | 3  |

|     |   |   |   |   |   |   |   |   |   |   |   |   |   |   |   |   |   |   |   |   |   |    |   |   |   |   |   |   |    |    |
|-----|---|---|---|---|---|---|---|---|---|---|---|---|---|---|---|---|---|---|---|---|---|----|---|---|---|---|---|---|----|----|
| ENG | 6 | 6 | 2 | 6 | 6 | 6 | 1 | 7 | 7 | 6 | 2 | 3 | 3 | 1 | 2 | 6 | 6 | 1 | 1 | 1 | 6 | EM | 1 | 6 | 1 | 5 | 1 | 1 | EM | EM |
| ENG | 1 | 1 | 7 | 7 | 1 | 1 | 7 | 7 | 6 | 7 | 2 | 1 | 2 | 1 | 2 | 6 | 3 | 1 | 1 | 2 | 6 | EM | 1 | 6 | 1 | 5 | 1 | 5 | EM | EM |
| ENG | 2 | 1 | 6 | 6 | 6 | 5 | 2 | 3 | 5 | 6 | 2 | 2 | 2 | 1 | 6 | 7 | 2 | 1 | 1 | 1 | 5 | 2  | 1 | 4 | 1 | 2 | 5 | 2 | 5  | 2  |
| ENG | 2 | 2 | 3 | 6 | 1 | 2 | 1 | 7 | 7 | 5 | 2 | 4 | 3 | 1 | 3 | 6 | 1 | 1 | 1 | 2 | 1 |    | 1 | 1 | 1 | 5 | 4 | 1 | 4  | 1  |
| ENG | 3 | 3 | 6 | 7 | 4 | 3 | 3 | 6 | 7 | 6 | 1 | 2 | 5 | 1 | 5 | 4 | 3 | 1 | 1 | 2 | 1 |    | 2 | 1 | 1 | 2 | 5 | 3 | 5  | 3  |
| ENG | 4 | 5 | 4 | 5 | 4 | 4 | 3 | 4 | 6 | 6 | 2 | 2 | 6 | 3 | 3 | 5 | 5 | 1 | 1 | 2 | 1 |    | 2 | 1 | 1 | 2 | 6 | 1 | 6  | 1  |
| ENG | 4 | 4 | 3 | 5 | 2 | 5 | 3 | 3 | 5 | 6 | 4 | 4 | 2 | 1 | 5 | 6 | 3 | 1 | 1 | 2 | 1 |    | 2 | 1 | 1 | 5 | 2 | 5 | 2  | 5  |
| ENG | 4 | 4 | 6 | 4 | 4 | 4 | 6 | 3 | 7 | 7 | 1 | 1 | 4 | 1 | 5 | 3 | 3 | 1 | 1 | 2 | 1 |    | 1 | 1 | 1 | 6 | 4 | 1 | 4  | 1  |
| ENG | 6 | 5 | 3 | 3 | 3 | 6 | 5 | 4 | 6 | 5 | 3 | 2 | 2 | 3 | 6 | 6 | 3 | 1 | 2 | 2 | 2 |    | 1 | 2 | 1 | 5 | 4 | 2 | 4  | 2  |
| ENG | 2 | 2 | 5 | 5 | 4 | 4 | 5 | 5 | 6 | 6 | 2 | 3 | 2 | 2 | 3 | 3 | 2 | 1 | 3 | 2 | 1 |    | 1 | 1 | 1 | 5 | 2 | 2 | 2  | 2  |
| ENG | 1 | 1 | 7 | 6 | 2 | 4 | 5 | 5 | 7 | 7 | 5 | 3 | 4 | 1 | 7 | 6 | 2 | 1 | 3 | 2 | 1 |    | 2 | 1 | 1 | 6 | 7 | 1 | 7  | 1  |
| ENG | 6 | 6 | 2 | 4 | 6 | 6 | 2 | 4 | 7 | 7 | 2 | 2 | 3 | 1 | 1 | 6 | 3 | 1 | 1 | 1 | 4 | 2  | 1 | 1 | 1 | 5 | 5 | 3 | 5  | 3  |
| ENG | 1 | 4 | 7 | 6 | 1 | 1 | 7 | 4 | 6 | 7 | 1 | 2 | 3 | 1 | 1 | 1 | 7 | 1 | 1 | 2 | 5 | 1  | 1 | 3 | 1 | 6 | 4 | 4 | 4  | 4  |
| ENG | 4 | 4 | 6 | 6 | 3 | 4 | 5 | 6 | 7 | 6 | 1 | 1 | 3 | 2 | 1 | 5 | 3 | 1 | 1 | 2 | 1 |    | 2 | 1 | 1 | 2 | 4 | 1 | 4  | 1  |
| ENG | 3 | 4 | 5 | 3 | 3 | 3 | 4 | 5 | 7 | 7 | 3 | 5 | 3 | 1 | 5 | 6 | 2 | 1 | 1 | 2 | 1 |    | 2 | 1 | 1 | 5 | 5 | 2 | 5  | 2  |
| ENG | 6 | 4 | 5 | 6 | 4 | 6 | 5 | 6 | 5 | 6 | 5 | 5 | 4 | 6 | 5 | 6 | 5 | 1 | 1 | 2 | 1 |    | 1 | 1 | 1 | 2 | 5 | 1 | 5  | 1  |
| ENG | 4 | 4 | 4 | 4 | 5 | 5 | 5 | 5 | 5 | 5 | 5 | 5 | 6 | 4 | 5 | 4 | 4 | 1 | 1 | 1 | 5 | 6  | 2 | 3 | 1 | 5 | 5 | 4 | 5  | 4  |
| ENG | 6 | 6 | 4 | 7 | 4 | 4 | 6 | 6 | 6 | 6 | 4 | 4 | 6 | 1 | 6 | 3 | 5 | 1 | 1 | 2 | 1 |    | 1 | 1 | 1 | 5 | 4 | 1 | 4  | 1  |
| ENG | 4 | 3 | 3 | 4 | 3 | 4 | 2 | 4 | 4 | 5 | 5 | 5 | 2 | 2 | 3 | 2 | 6 | 1 | 1 | 1 | 6 | EM | 1 | 6 | 1 | 5 | 3 | 5 | EM | EM |
| ENG | 1 | 1 | 6 | 5 | 1 | 6 | 1 | 5 | 7 | 7 | 3 | 7 | 2 | 1 | 4 | 1 | 6 | 1 | 1 | 2 | 5 | 3  | 1 | 2 | 1 | 2 | 6 | 8 | 6  | 8  |
| ENG | 7 | 1 | 1 | 2 | 7 | 2 | 1 | 2 | 6 | 5 | 2 | 2 | 3 | 3 | 6 | 6 | 3 | 1 | 1 | 1 | 6 | EM | 1 | 6 | 1 | 5 | 3 | 4 | EM | EM |
| ENG | 4 | 4 | 3 | 5 | 6 | 5 | 2 | 3 | 6 | 6 | 2 | 3 | 3 | 1 | 5 | 5 | 4 | 1 | 1 | 2 | 2 |    | 1 | 2 | 1 | 5 | 4 | 2 | 4  | 2  |
| ENG | 1 | 2 | 7 | 7 | 2 | 2 | 6 | 7 | 6 | 7 | 2 | 3 | 2 | 5 | 6 | 4 | 4 | 1 | 1 | 1 | 3 | DK | 1 | 2 | 1 | 2 | 5 | 2 | 5  | 2  |
| ENG | 6 | 7 | 2 | 6 | 6 | 6 | 2 | 6 | 7 | 7 | 2 | 3 | 2 | 5 | 4 | 5 | 5 | 1 |   | 2 | 1 |    | 1 | 2 | 1 | 5 |   | 1 |    | 1  |
| ENG | 6 | 6 | 2 | 1 | 5 | 6 | 1 | 3 | 6 | 6 | 1 | 1 | 2 | 1 | 4 | 6 | 6 | 1 | 3 | 2 | 6 | EM | 1 | 6 | 1 | 5 | 1 | 2 | EM | EM |
| ENG | 3 | 3 | 5 | 3 | 3 | 3 | 5 | 6 | 7 | 6 | 2 | 5 | 3 | 1 | 2 | 5 | 5 | 1 | 4 | 2 | 5 | 8  | 1 | 3 | 1 | 5 | 4 | 2 | 4  | 2  |
| ENG | 6 | 6 | 4 | 5 | 4 | 4 | 4 | 4 | 4 | 5 | 2 | 2 | 2 | 2 | 4 | 5 | 2 | 1 | 2 | 2 | 3 | 1  | 1 | 5 | 1 | 5 | 4 | 7 | 4  | 7  |
| ENG | 7 | 7 | 1 | 4 |   |   |   |   |   |   |   | 2 | 1 | 1 | 1 | 1 | 1 | 1 | 3 | 2 | 4 | 6  | 1 | 4 | 2 | 5 | 3 | 8 | 3  | 8  |
| ENG | 5 | 5 | 5 | 5 | 7 | 6 | 6 | 6 | 7 | 5 | 5 | 5 | 4 | 1 | 7 | 7 | 7 | 1 | 3 | 2 | 4 | 7  | 2 | 2 | 1 | 5 | 3 | 1 | 3  | 1  |
| ENG | 6 | 5 | 1 | 2 | 5 | 5 | 2 | 2 | 6 | 7 | 1 | 2 | 2 | 2 | 5 | 5 | 6 | 1 | 3 | 2 | 6 | EM | 1 | 6 | 1 | 5 | 2 | 1 | EM | EM |
| ENG | 3 | 3 | 5 | 6 | 2 | 2 | 6 | 6 | 6 | 6 | 3 | 2 | 2 | 1 | 1 | 3 | 3 | 1 | 1 | 1 | 1 |    | 1 | 1 | 1 | 5 | 2 | 4 | 2  | 4  |
| ENG | 6 | 6 | 2 | 2 | 6 | 6 | 2 | 2 | 6 | 7 | 5 | 5 | 2 | 5 | 5 | 4 | 3 | 1 | 2 | 2 | 6 | EM | 1 | 6 | 1 | 5 | 2 | 1 | EM | EM |

|     |   |   |   |   |   |   |   |   |   |   |   |   |   |   |   |   |   |   |   |   |   |    |   |   |   |   |   |   |   |   |
|-----|---|---|---|---|---|---|---|---|---|---|---|---|---|---|---|---|---|---|---|---|---|----|---|---|---|---|---|---|---|---|
| ENG | 5 | 6 | 2 | 2 | 7 | 7 | 1 | 2 | 7 | 7 | 1 | 1 | 2 | 1 | 5 | 6 | 7 | 1 | 3 | 2 | 3 | 3  | 1 | 4 | 1 | 5 | 6 | 1 | 6 | 1 |
| ENG | 6 | 5 | 2 | 4 | 4 | 5 | 2 | 4 | 6 | 6 | 4 | 5 | 4 | 1 | 4 | 5 | 4 | 1 | 1 | 1 | 4 | 1  | 1 | 2 | 1 | 5 | 7 | 1 | 7 | 1 |
| ENG | 5 | 5 | 5 | 5 | 4 | 5 | 5 | 4 | 5 | 5 | 3 | 5 | 2 | 1 | 1 | 3 | 7 | 1 | 3 | 2 | 3 | 3  | 1 | 3 | 1 | 5 | 4 | 2 | 4 | 2 |
| ENG | 6 | 5 | 4 | 6 | 6 | 6 | 5 | 5 | 6 | 6 | 2 | 2 | 3 | 1 | 4 | 5 | 3 | 1 | 3 | 2 | 5 | 4  | 1 | 4 | 1 | 5 | 6 | 2 | 6 | 2 |
| ENG | 5 | 5 | 3 | 5 | 5 | 5 | 2 | 5 | 7 | 6 | 2 | 3 | 2 | 2 | 3 | 7 | 5 | 1 | 1 | 1 | 1 |    | 1 | 1 | 1 | 5 | 4 | 1 | 4 | 1 |
| ENG | 6 | 6 | 6 | 6 | 5 | 6 | 5 | 2 | 4 | 4 | 4 | 4 | 2 | 6 | 6 | 6 | 6 | 2 | 2 | 2 | 1 |    | 1 | 1 | 1 | 2 | 3 | 3 | 3 | 3 |
| ENG | 5 | 4 | 2 | 6 | 6 | 4 | 2 | 5 | 5 | 7 | 2 | 2 | 2 | 3 | 3 | 3 | 3 | 1 | 1 | 1 | 1 |    | 1 | 1 | 1 | 5 | 6 | 1 | 6 | 1 |
| ENG | 3 | 4 | 6 | 6 | 4 | 3 | 6 | 6 | 6 | 7 | 3 | 2 | 2 | 1 | 5 | 7 | 2 | 1 | 1 | 1 | 1 |    | 2 | 1 | 1 | 5 | 6 | 1 | 6 | 1 |
| ENG | 1 | 3 | 3 | 2 | 1 | 3 | 3 | 2 | 7 | 7 | 7 | 5 | 2 | 1 | 6 | 4 | 7 | 1 | 1 | 1 | 5 | 2  | 1 | 5 | 1 | 5 | 3 | 3 | 3 | 3 |
| ENG | 5 | 2 | 6 | 6 | 3 | 6 | 5 | 5 | 4 | 6 | 2 | 3 | 3 | 1 | 6 | 7 | 2 | 1 | 1 | 1 | 1 |    | 2 | 1 | 1 | 5 | 5 | 1 | 5 | 1 |
| ENG | 6 | 6 | 4 | 5 | 4 | 6 | 4 | 6 | 7 | 6 | 5 | 5 | 2 | 4 | 1 | 7 | 6 | 1 | 1 | 1 | 5 | 5  | 1 | 6 | 1 | 5 | 4 | 2 | 4 | 2 |
| ENG | 4 | 4 | 2 | 4 | 4 | 4 | 4 | 4 | 6 | 6 | 4 | 5 | 2 | 3 | 6 | 6 | 2 | 1 | 1 | 1 | 5 | 2  | 2 | 3 | 1 | 5 | 5 | 2 | 5 | 2 |
| ENG | 5 | 5 | 1 | 7 | 5 | 5 | 1 | 7 | 7 | 7 | 2 | 3 | 4 | 1 | 2 | 3 | 7 | 1 | 2 | 2 | 1 |    | 1 | 1 | 1 | 5 | 5 | 1 | 5 | 1 |
| ENG | 4 | 5 | 3 | 5 | 5 | 5 | 3 | 4 | 6 | 6 | 4 | 3 | 3 | 3 | 4 | 3 | 3 | 1 | 1 | 1 | 1 |    | 1 | 1 | 1 | 5 | 6 | 2 | 6 | 2 |
| ENG | 4 | 4 | 5 | 6 | 3 | 4 | 5 | 5 | 7 | 7 | 3 | 2 | 4 | 1 | 2 | 5 | 5 | 1 | 1 | 1 | 1 |    | 1 | 1 | 1 | 5 | 4 | 1 | 4 | 1 |
| ENG | 7 | 5 | 1 | 5 | 7 | 5 | 1 | 5 | 7 | 7 | 2 | 3 | 3 | 1 | 1 | 1 | 7 | 1 | 1 | 1 | 1 |    | 1 | 1 | 1 | 5 | 4 | 1 | 4 | 1 |
| ENG | 3 | 2 | 2 | 5 | 4 | 4 | 3 | 5 | 6 | 7 | 1 | 2 | 2 | 1 | 2 | 3 | 5 | 1 | 1 | 1 | 1 |    | 1 | 2 | 1 | 7 | 3 | 2 | 3 | 2 |
| ENG | 7 | 7 | 1 | 7 | 4 | 4 | 3 | 5 | 7 | 7 | 1 | 1 | 3 | 2 | 4 | 7 | 4 | 1 | 1 | 1 | 1 |    | 1 | 1 | 1 | 5 | 2 | 5 | 2 | 5 |
| ENG | 5 | 5 | 2 | 2 | 7 | 5 | 1 | 3 | 7 | 7 | 4 | 4 | 3 | 1 | 5 | 4 | 4 | 1 | 1 | 1 | 5 | 3  | 1 | 5 | 1 | 2 | 7 | 8 | 7 | 8 |
| ENG | 5 | 5 | 1 | 3 | 6 | 3 | 3 | 3 | 6 | 6 | 3 | 3 | 1 | 1 | 3 | 6 | 5 | 1 | 1 | 1 | 5 | 7  | 1 | 5 | 1 | 5 | 6 | 2 | 6 | 2 |
| ENG | 5 | 3 | 3 | 5 | 5 | 5 | 3 | 3 | 7 | 7 | 1 | 1 | 2 | 1 | 3 | 5 | 3 | 1 | 1 | 1 | 5 | 3  | 1 | 6 | 1 | 5 | 5 | 1 | 5 | 1 |
| ENG | 4 | 4 | 4 | 4 | 4 | 4 | 4 | 4 | 7 | 7 | 4 | 4 | 2 | 1 | 2 | 5 | 3 | 1 | 1 | 1 | 5 | 3  | 1 | 5 | 1 | 5 | 5 | 2 | 5 | 2 |
| ENG | 6 | 5 | 4 | 6 | 6 | 5 | 4 | 6 | 5 | 5 | 1 | 1 | 2 | 5 | 5 | 6 | 4 | 1 | 1 | 1 | 5 | 6  | 1 | 5 | 1 | 2 | 4 | 3 | 4 | 3 |
| ENG | 5 | 5 | 3 | 4 | 4 | 4 | 4 | 5 | 6 | 7 | 2 | 2 | 3 | 1 | 4 | 5 | 3 | 1 | 1 | 1 | 1 |    | 2 | 1 | 1 | 5 | 4 | 2 | 4 | 2 |
| ENG | 3 | 3 | 5 | 6 | 4 | 4 | 3 | 6 | 7 | 7 | 2 | 4 | 4 | 3 | 5 | 5 | 3 | 1 | 1 | 1 | 1 |    | 1 | 2 | 1 | 6 | 4 | 3 | 4 | 3 |
| ENG | 4 | 4 | 2 | 5 | 5 | 4 | 2 | 4 | 7 | 7 | 2 | 2 | 2 | 1 | 1 | 1 | 7 | 1 | 1 | 1 | 1 |    | 1 | 1 | 1 | 5 | 5 | 2 | 5 | 2 |
| ENG | 5 | 5 | 1 | 2 | 5 | 5 | 3 | 2 | 7 | 7 | 2 | 3 | 2 | 2 | 2 | 1 | 6 | 1 | 1 | 1 | 5 | 6  | 1 | 6 | 1 | 5 | 1 | 1 | 1 | 1 |
| ENG | 5 | 4 | 6 | 5 | 4 | 4 | 3 | 5 | 5 | 6 | 2 | 2 | 3 | 2 | 4 | 5 | 3 | 1 | 1 | 1 | 1 |    | 1 | 1 | 1 | 5 | 5 | 4 | 5 | 4 |
| ENG | 1 | 1 | 7 | 7 | 7 | 7 | 1 | 1 | 5 | 6 | 2 | 2 | 1 | 4 | 7 | 7 | 1 | 1 | 1 | 1 | 5 | 2  | 2 | 4 | 1 | 5 | 4 | 2 | 4 | 2 |
| ENG | 6 | 6 | 2 | 4 | 6 | 5 | 4 | 5 | 7 | 7 | 2 | 2 | 3 | 5 | 4 | 5 | 4 | 1 | 1 | 1 | 6 | AD | 2 | 6 | 1 | 5 | 6 | 1 | 6 | 1 |
| ENG | 6 | 5 | 3 | 3 | 6 | 7 | 4 | 4 | 7 | 7 | 3 | 2 | 3 | 1 | 4 | 6 | 4 | 1 | 1 | 1 | 4 | 3  | 1 | 2 | 1 | 5 | 4 | 2 | 4 | 2 |
| ENG | 6 | 6 | 1 | 4 | 6 | 6 | 2 | 5 | 5 | 6 | 2 | 4 | 2 | 1 | 2 | 5 | 3 | 1 | 1 | 1 | 5 | 3  | 1 | 4 | 1 | 5 | 5 | 1 | 5 | 1 |

|     |   |   |   |   |   |   |   |   |   |   |   |   |   |   |   |   |   |   |   |   |   |    |   |   |   |   |   |   |    |    |
|-----|---|---|---|---|---|---|---|---|---|---|---|---|---|---|---|---|---|---|---|---|---|----|---|---|---|---|---|---|----|----|
| ENG | 5 | 6 | 1 | 1 | 5 | 4 | 2 | 4 | 7 | 7 | 2 | 4 | 1 | 6 | 5 | 4 | 4 | 1 | 1 | 1 | 5 | 2  | 1 | 6 | 1 | 5 | 2 | 3 | 2  | 3  |
| ENG | 5 | 5 | 4 | 5 | 5 | 5 | 3 | 4 | 6 | 6 | 3 | 2 | 3 | 3 | 2 | 3 | 3 | 1 | 1 | 1 | 6 | EM | 1 | 6 | 1 | 5 | 6 | 2 | EM | EM |
| ENG | 5 | 2 | 6 | 6 | 5 | 3 | 5 | 5 | 4 | 4 | 6 | 5 | 4 | 2 | 2 | 6 | 4 | 1 | 1 | 1 | 4 | 5  | 2 | 2 | 1 | 5 | 5 | 2 | 5  | 2  |
| ENG | 5 | 4 | 1 | 6 | 4 | 3 | 4 | 5 | 7 | 7 | 4 | 4 | 4 | 1 | 2 | 5 | 3 | 1 | 1 | 1 | 2 | 1  | 2 | 1 | 7 | 4 | 3 | 4 | 3  |    |
| ENG | 1 | 6 | 2 | 2 | 2 | 7 | 1 | 1 | 6 | 7 | 2 | 3 | 2 | 6 | 5 | 2 | 6 | 1 | 1 | 1 | 6 | EM | 1 | 6 | 1 | 5 | 1 | 1 | EM | EM |
| ENG | 6 | 4 | 5 | 5 | 5 | 4 | 3 | 4 | 6 | 6 | 3 | 3 | 3 | 1 | 5 | 1 | 6 | 1 | 1 | 1 | 1 | 1  | 1 | 1 | 5 | 5 | 2 | 5 | 2  |    |
| ENG | 4 | 4 | 5 | 3 | 4 | 4 | 3 | 5 | 6 | 7 | 4 | 2 | 2 | 2 | 4 | 5 | 3 | 1 | 1 | 1 | 5 | DK | 1 | 4 | 1 | 5 | 3 | 4 | 3  | 4  |
| ENG | 4 | 3 | 4 | 4 |   |   |   |   | 7 | 7 | 7 | 7 | 2 | 1 |   | 5 | 4 | 1 | 1 | 1 | 5 | 4  | 1 | 4 | 1 | 5 | 5 | 2 | 5  | 2  |
| ENG | 5 | 2 | 6 | 5 | 5 | 2 | 5 | 6 | 5 | 6 | 2 | 2 | 5 | 2 | 5 | 6 | 5 | 1 | 1 | 1 | 1 | 1  | 2 | 1 | 1 | 5 | 3 | 2 | 3  | 2  |
| ENG | 4 | 1 | 7 | 5 | 2 | 3 | 5 | 6 | 7 | 7 | 1 | 1 | 5 | 3 | 4 | 2 | 6 | 1 | 1 | 2 | 1 | 1  | 1 | 1 | 5 | 4 | 1 | 4 | 1  |    |
| ENG | 3 | 6 | 3 | 4 | 2 | 4 | 4 | 5 | 5 | 5 | 4 | 3 | 3 | 1 | 1 | 5 | 5 | 1 | 1 | 1 | 6 | EM | 1 | 6 | 1 | 5 | 1 | 2 | EM | EM |
| ENG | 4 | 3 | 5 | 3 | 2 | 3 | 4 | 4 | 7 | 7 | 2 | 2 | 2 | 2 | 5 | 6 | 4 | 1 | 1 | 1 | 5 | 4  | 1 | 4 | 1 | 5 | 6 | 1 | 6  | 1  |
| ENG | 3 | 5 | 2 | 4 | 4 | 4 | 4 | 6 | 6 | 6 | 2 | 2 | 3 | 1 | 2 | 7 | 5 | 1 | 1 | 1 | 1 | 1  | 2 | 1 | 1 | 5 | 4 | 1 | 4  | 1  |
| ENG | 7 | 7 | 1 | 4 | 6 | 7 | 1 | 4 | 7 | 7 | 2 | 1 | 3 | 1 | 5 | 7 | 2 | 1 | 1 | 1 | 6 | EM | 1 | 6 | 1 | 5 | 3 | 2 | EM | EM |
| ENG | 6 | 6 | 1 | 4 | 6 | 5 | 2 | 4 | 7 | 5 | 5 | 3 | 2 | 1 | 2 | 6 | 4 | 1 | 1 | 1 | 5 | 2  | 1 | 5 | 1 | 5 | 5 | 2 | 5  | 2  |
| ENG | 4 | 3 | 3 | 5 | 4 | 4 | 2 | 2 | 5 | 6 | 3 | 2 | 2 | 1 | 3 | 5 | 2 | 1 | 1 | 1 | 5 | 3  | 1 | 6 | 1 | 5 | 2 | 5 | 2  | 5  |
| ENG | 4 | 4 | 1 | 1 | 4 | 7 | 4 | 4 | 7 | 7 | 4 | 2 | 3 | 1 | 2 | 6 | 7 | 1 | 2 | 1 | 5 | 5  | 1 | 6 | 1 | 5 | 2 | 4 | 2  | 4  |
| ENG | 2 | 5 | 3 | 5 | 5 | 4 | 3 | 2 | 6 | 6 | 3 | 2 | 2 | 1 | 3 | 5 | 4 | 1 | 1 | 1 | 5 | 5  | 1 | 4 |   | 7 | 7 | 3 | 7  | 3  |
| ENG | 5 | 5 | 4 | 5 | 6 | 6 | 3 | 3 | 6 | 6 | 5 | 3 | 2 | 1 | 1 | 5 | 4 | 1 | 2 | 1 | 3 | 2  | 1 | 4 | 1 | 5 | 4 | 2 | 4  | 2  |
| ENG | 5 | 5 | 3 | 3 | 6 | 6 | 2 | 2 | 6 | 7 | 2 | 2 | 2 | 1 | 4 | 6 | 4 | 1 | 1 | 1 | 2 | 1  | 1 | 3 | 1 | 5 | 6 | 2 | 6  | 2  |
| ENG | 2 | 2 | 6 | 6 | 6 | 2 | 2 | 6 | 6 | 7 | 2 | 2 | 5 | 1 | 1 | 1 | 7 | 1 | 1 | 1 | 6 | RP | 2 | 2 | 1 | 5 | 5 | 1 | 5  | 1  |
| ENG | 4 | 3 | 3 | 6 | 2 | 6 | 2 | 5 | 7 | 7 | 4 | 4 | 2 | 1 | 4 | 6 | 4 | 1 | 3 | 1 | 3 | 2  | 2 | 2 | 1 | 5 | 6 | 1 | 6  | 1  |
| ENG | 2 | 3 | 6 | 1 | 4 | 4 | 4 | 4 | 5 | 7 | 1 | 2 | 3 | 1 | 4 | 5 | 3 | 1 | 1 | 1 | 5 | 4  | 1 | 4 | 1 | 5 | 5 | 2 | 5  | 2  |
| ENG | 4 | 6 | 2 | 2 | 6 | 6 | 3 | 4 | 5 | 4 | 2 | 2 | 2 | 2 | 4 | 5 | 4 | 1 | 1 | 1 | 5 | 3  | 1 | 5 | 1 | 5 | 3 | 3 | 3  | 3  |
| ENG | 5 | 5 | 2 | 4 | 5 | 5 | 3 | 3 | 6 | 7 | 3 | 3 | 4 | 2 | 2 | 5 | 4 | 1 | 1 | 2 | 5 | 3  | 1 | 3 |   | 6 | 2 | 6 | 2  |    |
| ENG | 5 | 6 | 2 | 4 | 6 | 6 | 3 | 3 | 7 | 6 | 2 | 2 | 2 | 3 | 3 | 2 | 5 | 1 | 1 | 2 | 5 | 2  | 1 | 4 | 1 | 5 | 5 | 2 | 5  | 2  |
| ENG | 5 | 5 | 2 | 3 | 5 | 5 | 2 | 2 | 5 | 6 | 5 | 3 | 3 | 1 | 3 | 6 | 5 | 1 | 2 | 2 | 5 | 2  | 1 | 5 | 1 | 5 | 5 | 2 | 5  | 2  |
| ENG | 7 | 5 | 3 | 7 | 7 | 6 | 3 | 4 | 4 | 7 | 2 | 2 | 3 | 1 | 3 | 5 | 5 | 1 | 1 | 2 | 3 | 3  | 1 | 3 | 1 | 5 | 6 | 2 | 6  | 2  |
| ENG | 5 | 6 | 3 | 4 | 5 | 6 | 2 | 2 | 7 | 7 | 2 | 2 | 3 | 1 | 5 | 5 | 5 | 1 | 1 | 2 | 3 | 1  | 2 | 2 | 1 | 5 | 4 | 2 | 4  | 2  |
| ENG | 7 | 7 | 7 | 7 | 7 | 7 | 7 | 7 | 7 | 7 | 7 | 7 | 4 | 7 | 2 | 2 | 7 | 1 | 1 | 1 | 1 | 1  | 1 | 1 | 1 | 2 | 7 | 3 | 7  | 3  |
| ENG | 3 | 3 | 4 | 3 | 2 | 2 | 4 | 3 | 6 | 5 | 3 | 3 | 3 | 3 | 3 | 4 | 4 | 1 | 1 | 2 | 6 | EM | 1 | 6 | 1 | 5 | 3 | 1 | EM | EM |
| ELI | 3 | 4 | 1 | 6 | 4 | 5 | 1 | 3 | 7 | 7 | 3 | 2 | 6 | 1 | 3 | 7 | 5 | 1 | 1 | 2 | 1 | 2  | 1 | 1 | 5 | 3 | 4 | 3 | 4  |    |



|     |   |   |   |   |   |   |   |   |   |   |   |   |   |   |   |   |   |   |   |   |   |    |   |   |   |   |   |   |    |    |   |   |
|-----|---|---|---|---|---|---|---|---|---|---|---|---|---|---|---|---|---|---|---|---|---|----|---|---|---|---|---|---|----|----|---|---|
| ELI | 4 | 5 | 3 | 3 | 5 | 5 | 2 | 4 | 5 | 6 | 5 | 3 | 7 | 1 | 4 | 6 | 5 | 1 | 2 | 2 | 1 | 2  | 2 | 1 | 5 | 2 | 2 | 2 | 2  |    |   |   |
| ELI | 1 | 1 | 7 | 7 | 7 | 7 | 2 | 2 | 7 | 7 | 6 | 5 | 6 | 4 | 2 | 1 | 7 | 1 | 1 | 2 | 1 | 1  | 2 | 1 | 1 | 1 | 1 | 5 | 1  | 5  |   |   |
| ELI | 5 | 5 | 3 | 4 | 5 | 5 | 2 | 2 | 6 | 7 | 7 | 5 | 7 | 1 | 6 | 6 | 5 | 1 | 1 | 2 | 1 | 2  | 2 | 2 | 2 | 3 | 2 | 5 | 2  | 5  |   |   |
| ELI | 7 | 7 | 1 | 4 | 7 | 7 | 1 | 4 | 6 | 6 | 4 | 5 | 6 | 1 | 1 | 5 | 7 | 1 | 2 | 2 | 5 | 2  | 2 | 2 | 2 | 1 | 5 | 3 | 4  | 3  | 4 |   |
| ELI | 4 | 4 | 2 | 4 | 2 | 4 | 4 | 4 | 5 | 3 | 5 | 4 | 5 | 1 | 2 | 5 | 5 | 1 | 2 | 2 | 5 | 4  | 1 | 4 | 1 | 5 | 3 | 4 | 3  | 4  |   |   |
| ELI | 3 | 3 | 3 | 5 | 5 | 5 | 5 | 4 | 5 | 6 | 5 | 6 | 6 | 2 | 2 | 3 | 4 | 1 | 1 | 2 | 6 | EM | 1 | 6 | 1 | 5 | 1 | 2 | EM | EM |   |   |
| ELI | 1 | 1 | 4 | 5 | 1 | 1 | 4 | 4 | 7 | 7 | 6 | 5 | 8 | 1 | 1 | 6 | 4 | 1 | 2 | 2 | 1 | 1  | 1 | 1 | 1 | 5 | 3 | 3 | 3  | 3  |   |   |
| ELI | 3 | 5 | 1 | 4 | 4 | 6 | 2 | 2 | 6 | 5 | 6 | 4 | 7 | 1 | 2 | 4 | 5 | 1 | 2 | 2 | 5 | 2  | 1 | 4 | 1 | 5 | 2 | 3 | 2  | 3  |   |   |
| ELI | 5 | 4 | 1 | 4 | 6 | 6 | 1 | 3 | 6 | 7 | 4 | 2 | 5 | 1 | 2 | 7 | 6 | 1 | 2 | 2 | 1 | 2  | 2 | 2 | 2 | 1 | 5 | 1 | 5  | 1  | 5 |   |
| ELI | 4 | 5 | 2 | 4 | 5 | 5 | 2 | 4 | 7 | 5 | 7 | 3 | 6 | 1 | 4 | 5 | 5 | 1 | 2 | 2 | 1 | 2  | 2 | 2 | 2 | 1 | 5 | 1 | 8  | 1  | 8 |   |
| ELI | 6 | 7 | 1 | 2 | 7 | 7 | 1 | 4 | 5 | 5 | 5 | 5 | 6 | 1 | 1 | 4 | 4 | 1 | 1 | 2 | 5 | 1  | 1 | 5 | 1 | 5 | 3 | 4 | 3  | 4  |   |   |
| ELI | 5 | 4 | 1 | 4 | 6 | 5 | 1 | 2 | 4 | 6 | 5 | 5 | 7 | 2 | 2 | 5 | 6 | 1 | 1 | 1 | 5 | 1  | 1 | 5 | 1 | 5 | 2 | 4 | 2  | 4  |   |   |
| ELI | 5 | 2 | 4 | 5 | 3 | 2 | 6 | 5 | 6 | 7 | 4 | 2 | 7 | 1 | 1 | 6 | 7 | 1 | 2 | 1 | 5 | 2  | 2 | 2 | 1 | 5 | 4 | 2 | 4  | 2  |   |   |
| ELI | 3 | 4 | 3 | 6 | 5 | 5 | 3 | 5 | 7 | 7 | 4 | 4 | 6 | 1 | 2 | 6 | 7 | 1 | 1 | 1 | 5 | 2  | 1 | 3 | 1 | 5 | 5 | 2 | 5  | 2  |   |   |
| ELI | 6 | 6 | 2 | 3 | 4 | 5 | 4 | 4 | 5 | 6 | 4 | 2 | 7 | 1 | 4 | 6 | 6 | 1 | 1 | 1 | 5 | 3  | 1 | 5 | 1 | 5 | 6 | 2 | 6  | 2  |   |   |
| ELI | 4 | 2 | 3 | 5 | 3 | 3 | 6 | 2 | 7 | 6 | 2 | 2 | 7 | 1 | 6 | 4 | 4 | 1 | 1 | 1 | 3 | 2  | 1 | 2 | 1 | 5 | 3 | 4 | 3  | 4  |   |   |
| ELI | 2 | 2 | 2 | 7 | 3 | 4 | 5 | 4 | 7 | 7 | 6 | 2 | 7 | 1 | 2 | 6 | 6 | 1 | 1 | 2 | 1 | 2  | 2 | 2 | 2 | 1 | 5 | 3 | 6  | 3  | 6 |   |
| ELI | 4 | 2 | 2 | 5 | 6 | 4 | 3 | 5 | 6 | 6 | 5 | 6 | 7 | 1 | 2 | 5 | 6 | 1 | 2 | 2 | 5 | 2  | 1 | 5 | 1 | 5 | 3 | 5 | 3  | 5  |   |   |
| ELI | 6 | 7 | 1 | 2 | 6 | 6 | 1 | 1 | 5 | 5 | 7 | 2 | 7 | 1 | 1 | 5 | 6 | 1 | 1 | 2 | 5 | 1  | 1 | 3 | 1 | 5 | 3 | 3 | 3  | 3  |   |   |
| ELI | 7 | 7 | 1 | 1 | 2 | 2 | 6 | 7 | 2 | 7 | 7 | 7 | 3 | 1 | 7 | 7 | 3 | 1 | 1 | 2 | 1 | 2  | 2 | 2 | 1 | 3 | 1 | 3 | 3  | 4  | 3 | 4 |
| ELI | 1 | 1 | 7 | 3 | 3 | 5 | 4 | 3 | 6 | 6 | 6 | 6 | 7 | 1 | 1 | 1 | 7 | 1 | 1 | 1 | 1 | 1  | 1 | 1 | 1 | 1 | 5 | 1 | 5  | 1  | 5 |   |
| ELI | 3 | 2 | 4 | 5 | 2 | 2 | 3 | 3 | 7 | 4 | 5 | 3 | 5 | 1 | 1 | 5 | 6 | 1 | 2 | 1 | 1 | 2  | 2 | 2 | 2 | 1 | 5 | 3 | 4  | 3  | 4 |   |
| ELI | 5 | 6 | 2 | 5 | 4 | 5 | 2 | 4 | 6 | 5 | 5 | 2 | 6 | 1 | 1 | 2 | 6 | 1 | 2 | 2 | 5 | 1  | 1 | 4 | 1 | 5 | 3 | 3 | 3  | 3  |   |   |
| ELI | 4 | 4 | 2 | 3 | 4 | 5 | 6 | 6 | 7 | 7 | 7 | 7 | 9 | 1 | 3 | 6 | 3 | 1 | 2 | 1 | 1 | 2  | 2 | 2 | 2 | 1 | 5 | 4 | 2  | 4  | 2 |   |
| ELI | 1 | 3 | 5 | 4 | 1 | 4 | 4 | 3 | 7 | 7 | 6 | 6 | 5 | 1 | 4 | 5 | 5 | 1 | 2 | 1 | 1 | 2  | 2 | 2 | 2 | 2 | 5 | 2 | 4  | 2  | 4 |   |
| ELI | 6 | 4 | 1 | 6 | 6 | 6 | 1 | 3 | 7 | 7 | 7 | 7 | 6 | 1 | 1 | 4 | 6 | 1 | 1 | 1 | 5 | 1  | 1 | 3 | 1 | 7 | 1 | 7 | 1  | 7  |   |   |
| ELI | 6 | 5 | 2 | 3 | 6 | 6 | 1 | 2 | 4 | 7 | 3 | 3 | 7 | 1 | 1 | 2 | 7 | 1 | 1 | 2 | 5 | 1  | 2 | 3 | 1 | 7 | 3 | 6 | 3  | 6  |   |   |
| ELI | 4 | 5 | 2 | 7 | 5 | 3 | 2 | 6 | 5 | 6 | 7 | 7 | 8 | 1 | 6 | 7 | 4 | 1 | 2 | 2 | 1 | 2  | 2 | 2 | 2 | 1 | 5 | 2 | 3  | 2  | 3 |   |
| ELI | 4 | 2 | 2 | 4 | 5 | 5 | 1 | 4 | 6 | 7 | 5 | 2 | 5 | 1 | 5 | 6 | 2 | 1 | 2 | 2 | 1 | 2  | 2 | 2 | 2 | 1 | 5 | 3 | 4  | 3  | 4 |   |
| ELI | 4 | 4 | 4 | 5 | 6 | 5 | 3 | 2 | 6 | 7 | 7 | 4 | 6 | 1 | 2 | 7 | 5 | 1 | 1 | 2 | 1 | 2  | 2 | 2 | 2 | 1 | 5 | 3 | 3  | 3  | 3 |   |
| ELI | 5 | 5 | 3 | 6 | 6 | 6 | 2 | 3 | 7 | 7 | 4 | 4 | 6 | 1 | 2 | 6 | 4 | 1 | 2 | 2 | 1 | 2  | 2 | 2 | 2 | 2 | 2 | 2 | 4  | 2  | 4 |   |
| ELI | 6 | 7 | 1 | 3 | 4 | 4 | 2 | 5 | 6 | 4 | 7 | 5 | 5 | 1 | 1 | 2 | 7 | 1 | 2 | 2 | 1 | 2  | 2 | 2 | 1 | 5 | 4 | 2 | 4  | 2  |   |   |

|     |   |   |   |   |   |   |   |   |   |   |   |   |   |   |   |   |   |   |   |   |   |    |    |   |   |   |   |   |   |    |    |
|-----|---|---|---|---|---|---|---|---|---|---|---|---|---|---|---|---|---|---|---|---|---|----|----|---|---|---|---|---|---|----|----|
| ELI | 5 | 5 | 3 | 5 | 5 | 5 | 3 | 5 | 5 | 6 | 7 | 4 | 8 | 1 | 3 | 5 | 5 | 1 | 2 | 2 | 5 | 1  | 2  | 3 | 1 | 2 | 2 | 4 | 2 | 4  |    |
| ELI | 3 | 3 | 5 | 5 | 4 | 3 | 5 | 5 | 5 | 4 | 6 | 5 | 7 | 1 | 3 | 5 | 4 | 1 | 2 | 2 | 5 | 1  | 2  | 4 | 1 | 5 | 2 | 4 | 2 | 4  |    |
| ELI | 5 | 5 | 2 | 5 | 5 | 5 | 2 | 4 | 5 | 5 | 4 | 3 | 7 | 1 | 1 | 5 | 6 | 1 | 2 | 2 | 5 | 2  | 1  | 6 | 1 | 5 | 2 | 5 | 2 | 5  |    |
| ELI | 2 | 2 | 3 | 3 | 2 | 4 | 3 | 3 | 2 | 5 | 6 | 5 | 8 | 1 | 2 | 3 | 6 | 1 | 2 | 2 | 5 | 1  | 2  | 5 | 1 | 5 | 1 | 6 | 1 | 6  |    |
| ELI | 5 | 4 | 2 | 4 | 5 | 4 | 2 | 4 | 7 | 5 | 7 | 4 | 9 | 2 | 1 | 4 | 7 | 1 | 2 | 2 | 1 |    | 2  | 1 | 1 | 5 | 2 | 8 | 2 | 8  |    |
| ELI | 6 | 5 | 5 | 4 | 4 | 5 | 5 | 6 | 5 | 6 | 7 | 5 | 7 | 1 | 1 | 1 | 7 | 1 | 2 | 2 | 1 |    | 2  | 1 | 2 | 5 | 1 | 4 | 1 | 4  |    |
| ELI | 5 | 4 | 2 | 6 | 5 | 4 | 2 | 4 | 7 | 7 | 7 | 1 | 7 | 1 | 3 | 6 | 5 | 1 | 2 | 2 | 1 |    | 2  | 2 | 1 | 5 | 3 | 3 | 3 | 3  |    |
| ELI | 6 | 6 | 2 | 2 | 4 | 5 | 3 | 2 | 7 | 7 | 4 | 4 | 8 | 1 | 5 | 7 | 2 | 1 | 2 | 2 | 1 |    | 1  | 1 | 1 | 5 | 3 | 3 | 3 | 3  |    |
| ELI | 5 | 6 | 2 | 3 | 5 | 5 | 3 | 3 | 7 | 7 | 6 | 5 | 7 | 1 | 2 | 5 | 7 | 1 | 2 | 2 | 1 |    | 2  | 1 | 1 | 5 | 2 | 5 | 2 | 5  |    |
| ELI | 6 | 6 | 4 | 4 | 4 | 4 | 4 | 4 | 7 | 7 | 7 | 7 | 8 | 1 | 1 | 3 | 6 | 1 | 3 | 2 | 1 |    | 2  | 1 | 1 | 5 | 3 | 3 | 3 | 3  |    |
| ELI | 3 | 3 | 1 | 3 | 2 | 3 | 1 | 2 | 7 | 7 | 5 | 4 | 6 | 1 | 1 | 5 | 6 | 1 | 1 | 1 | 5 | 2  | 1  | 4 | 1 | 5 | 2 | 7 | 2 | 7  |    |
| ELI | 6 | 5 | 2 | 3 | 5 | 5 | 1 | 3 | 6 | 4 | 5 | 7 | 7 | 1 | 1 | 5 | 5 | 1 | 1 | 2 | 6 | RF |    | 1 | 1 | 1 | 5 | 4 | 1 | 4  | 1  |
| ELI | 4 | 4 | 1 | 4 | 5 | 5 | 5 | 3 | 7 | 7 | 3 | 4 | 6 | 1 | 1 | 6 | 5 | 1 | 1 | 2 | 5 |    | 1  | 2 | 3 | 1 | 5 | 3 | 3 | 3  | 3  |
| ELI | 4 | 4 | 5 | 7 | 6 | 6 | 4 | 6 | 6 | 7 | 4 | 4 | 6 | 1 | 1 | 5 | 5 | 1 | 1 | 2 | 1 |    | 2  | 2 | 1 | 5 | 2 | 4 | 2 | 4  |    |
| ELI | 4 | 5 | 3 | 4 | 5 | 5 | 4 | 3 | 6 | 6 | 5 | 4 | 6 | 1 | 2 | 5 | 7 | 1 | 1 | 2 | 1 |    | 1  | 2 | 1 | 5 | 2 | 3 | 2 | 3  |    |
| ELI | 5 | 6 | 2 | 2 | 6 | 5 | 3 | 3 | 7 | 5 | 5 | 1 | 8 | 1 | 3 | 6 | 4 | 1 | 1 | 2 | 1 |    | 2  | 1 | 1 | 5 | 3 | 2 | 3 | 2  |    |
| ELI | 1 | 2 | 5 | 7 | 5 | 6 | 2 | 6 | 3 | 3 | 5 | 2 | 6 | 1 | 1 | 5 | 6 | 1 | 1 | 1 | 1 |    | 1  | 1 | 1 | 1 | 5 | 3 | 5 | 3  | 5  |
| ELI | 5 | 5 | 6 | 5 | 4 | 5 | 5 | 6 | 6 | 6 | 4 | 5 | 6 | 1 | 1 | 4 | 7 | 1 | 1 | 1 | 1 |    | 1  | 1 | 1 | 7 | 3 | 2 | 3 | 2  |    |
| ELI | 3 | 6 | 2 | 2 | 6 | 6 | 2 | 2 | 7 | 7 | 7 | 6 | 5 | 1 | 1 | 6 | 2 | 1 | 1 | 1 | 1 |    | 1  | 1 | 1 | 5 | 2 | 5 | 2 | 5  |    |
| ELI | 5 | 6 | 2 | 4 | 5 | 5 | 3 | 4 | 6 | 5 | 6 | 3 | 6 | 4 | 4 | 5 | 5 | 1 | 1 | 1 | 3 | DK |    | 2 | 3 | 1 | 5 | 3 | 3 | 3  | 3  |
| ELI | 1 | 1 | 5 | 5 | 5 | 3 | 5 | 5 | 6 | 7 | 6 | 4 | 6 | 1 | 4 | 6 | 3 | 1 | 1 | 1 | 5 |    | 3  | 2 | 5 | 1 | 5 | 2 | 8 | 2  | 8  |
| ELI | 4 | 4 | 2 | 4 | 5 | 4 | 3 | 4 | 7 | 7 | 6 | 7 | 6 | 1 | 1 | 5 | 7 | 1 | 1 | 1 | 1 |    | 1  | 1 | 1 | 5 | 4 | 3 | 4 | 3  |    |
| ELI | 3 | 4 | 5 | 6 | 6 | 7 | 3 | 3 | 6 | 6 | 5 | 5 | 6 | 1 | 7 | 5 | 5 | 1 | 1 | 1 | 1 |    | 2  | 1 | 1 | 5 | 3 | 5 | 3 | 5  |    |
| ELI | 5 | 4 | 2 | 5 | 3 | 5 | 3 | 5 | 5 | 6 | 3 | 4 | 7 | 1 | 5 | 7 | 4 | 1 | 2 | 1 | 5 |    | 4  | 2 | 3 | 1 | 6 | 3 | 3 | 3  | 3  |
| ELI | 1 | 1 | 7 | 7 | 1 | 2 | 6 | 6 | 5 | 4 | 7 | 5 | 7 | 1 | 2 | 2 | 6 | 2 | 2 | 1 | 3 | DK |    | 2 | 2 | 1 | 5 | 2 | 2 | 2  | 2  |
| ELI | 4 | 3 | 1 | 5 | 4 | 4 | 1 | 5 | 7 | 7 | 2 | 2 | 6 | 1 | 1 | 1 | 7 | 1 | 1 | 1 | 5 |    | 2  | 1 | 3 | 1 | 6 | 3 | 4 | 3  | 4  |
| ELI | 5 | 4 | 4 | 6 | 5 | 4 | 4 | 5 | 7 | 7 | 5 | 3 | 7 | 1 | 2 | 6 | 5 | 1 | 1 | 1 | 4 |    | 3  | 2 | 3 | 1 | 5 | 2 | 5 | 2  | 5  |
| ELI | 5 | 4 | 2 | 5 | 4 | 4 | 4 | 4 | 6 | 5 | 4 | 4 | 7 | 1 | 2 | 5 | 5 | 1 | 1 | 1 | 4 |    | DK | 2 | 2 | 1 | 5 | 2 | 4 | 2  | 4  |
| ELI | 2 | 1 | 1 | 3 | 6 | 6 | 4 | 4 | 4 | 4 | 5 | 4 | 5 | 1 | 2 | 1 | 7 | 1 | 3 | 1 | 6 | EM |    | 1 | 5 | 1 | 7 | 1 | 5 | EM | EM |
| ELI | 5 | 5 | 4 | 5 | 6 | 6 | 3 | 3 | 7 | 6 | 6 | 5 | 6 | 1 | 3 | 6 | 4 | 1 | 1 | 1 | 1 |    | 1  | 1 | 1 | 5 | 3 | 7 | 3 | 7  |    |
| ELI | 2 | 3 | 6 | 5 | 5 | 4 | 2 | 6 | 4 | 6 | 5 | 3 | 6 | 1 | 1 | 2 | 5 | 1 | 2 | 1 | 1 |    | 1  | 1 | 1 | 5 | 5 | 2 | 5 | 2  |    |
| ELI | 2 | 2 | 6 | 6 | 4 | 4 | 4 | 2 | 6 | 6 | 6 | 5 | 7 | 1 | 1 | 1 | 7 | 1 | 2 | 1 | 3 |    | DK | 2 | 2 | 1 | 5 | 3 | 3 | 3  | 3  |

|     |   |   |   |   |   |   |   |   |   |   |   |   |   |   |   |   |   |   |   |   |   |    |   |   |   |   |   |   |   |    |    |
|-----|---|---|---|---|---|---|---|---|---|---|---|---|---|---|---|---|---|---|---|---|---|----|---|---|---|---|---|---|---|----|----|
| ELI | 7 | 6 | 1 | 2 | 7 | 6 | 1 | 4 | 6 | 5 | 7 | 6 | 7 | 1 | 1 | 2 | 7 | 1 | 2 | 1 | 5 | 2  | 1 | 5 | 1 | 5 | 2 | 6 | 2 | 6  |    |
| EVO | 5 | 6 | 6 | 5 | 6 | 4 | 3 | 5 | 7 | 7 | 2 | 2 | 5 | 1 | 1 | 1 | 7 | 1 | 1 | 2 | 1 |    | 1 | 1 | 1 | 5 | 7 | 4 | 7 | 4  |    |
| EVO | 2 | 2 | 5 | 5 | 3 | 2 | 7 | 7 | 7 | 7 | 1 | 2 | 3 | 1 | 5 | 7 | 3 | 1 | 1 | 2 | 1 |    | 2 | 1 | 1 | 5 | 5 | 1 | 5 | 1  |    |
| EVO | 1 | 1 | 7 | 7 | 1 | 2 | 7 | 7 | 3 | 7 | 2 | 2 | 6 | 1 | 2 | 5 | 6 | 1 | 1 | 2 | 1 |    | 2 | 1 | 1 | 5 | 3 | 2 | 3 | 2  |    |
| EVO | 5 | 6 | 1 | 6 | 5 | 6 | 3 | 2 | 7 | 6 | 2 | 1 | 5 | 1 | 1 | 5 | 7 | 1 | 1 | 2 | 5 | 1  | 1 | 5 | 1 | 5 | 6 | 3 | 6 | 3  |    |
| EVO | 5 | 6 | 3 | 6 | 6 | 5 | 4 | 6 | 7 | 7 | 2 | 3 | 6 | 1 | 1 | 1 | 7 | 1 | 1 | 2 | 1 |    | 1 | 1 | 1 | 5 | 7 | 4 | 7 | 4  |    |
| EVO | 6 | 5 | 1 | 2 | 6 | 5 | 2 | 3 | 7 | 7 | 3 | 2 | 5 | 1 | 2 | 5 | 7 | 1 | 1 | 2 | 5 | 2  | 1 | 5 | 1 | 5 | 5 | 2 | 5 | 2  |    |
| EVO | 5 | 7 | 2 | 7 | 4 | 5 | 1 | 7 | 6 | 7 | 4 | 4 | 5 | 1 | 2 | 4 | 6 | 1 | 1 | 2 | 1 |    | 1 | 1 | 1 | 2 | 6 | 3 | 6 | 3  |    |
| EVO | 2 | 2 | 2 | 5 | 2 | 3 | 4 | 5 | 5 | 6 | 2 | 3 | 3 | 2 | 3 | 6 | 4 | 1 | 1 | 1 | 6 | RG |   | 2 | 2 | 1 | 5 | 5 | 1 | 5  | 1  |
| EVO | 2 | 2 | 6 | 4 | 5 | 6 | 2 | 6 | 7 | 7 | 2 | 2 | 4 | 1 | 3 | 7 | 5 | 1 | 1 | 1 | 1 |    | 2 | 1 | 1 | 1 | 6 | 2 | 6 | 2  |    |
| EVO | 5 | 4 | 4 | 5 | 4 | 4 | 3 | 5 | 6 | 6 | 2 | 3 | 6 | 3 | 5 | 3 | 5 | 1 | 1 | 1 | 2 |    | 2 | 1 | 1 | 2 | 5 | 3 | 5 | 3  |    |
| EVO | 2 | 3 | 6 | 5 | 3 | 3 | 5 | 5 | 7 | 7 | 2 | 3 | 6 | 2 | 3 | 5 | 5 | 1 | 1 | 1 | 2 |    | 2 | 1 | 1 | 5 | 5 | 1 | 5 | 1  |    |
| EVO | 7 | 5 | 1 | 3 | 6 | 6 | 2 | 2 | 6 | 7 | 1 | 1 | 5 | 1 | 3 | 5 | 5 | 1 | 2 | 1 | 2 |    | 2 | 2 | 1 | 5 | 5 | 1 | 5 | 1  |    |
| EVO | 6 | 5 | 2 | 3 | 4 | 4 | 4 | 4 | 6 | 7 | 2 | 3 | 5 | 1 | 4 | 4 | 6 | 1 | 1 | 1 | 1 |    | 1 | 1 | 2 | 7 | 2 | 2 | 2 | 2  |    |
| EVO | 6 | 5 | 3 | 3 | 6 | 5 | 3 | 3 | 7 | 7 | 1 | 1 | 4 | 1 | 4 | 5 | 5 | 1 | 1 | 1 | 6 | EM |   | 1 | 6 | 1 | 5 | 1 | 3 | EM | EM |
| EVO | 2 | 2 | 1 | 2 | 5 | 5 | 2 | 2 | 7 | 5 | 4 | 4 | 6 | 1 | 1 | 1 | 7 | 1 | 2 | 1 | 1 |    | 1 | 1 | 1 | 5 | 5 | 2 | 5 | 2  |    |
| EVO | 5 | 5 | 3 | 3 | 3 | 4 | 3 | 5 | 5 | 5 | 4 | 4 | 6 | 3 | 3 | 4 | 6 | 1 | 1 | 1 | 5 | 1  | 1 | 3 | 1 | 5 | 5 | 2 | 5 | 2  |    |
| EVO | 3 | 2 | 5 | 6 | 4 | 4 | 4 | 4 | 6 | 7 | 3 | 3 | 6 | 1 | 5 | 5 | 4 | 1 | 2 | 1 | 1 |    | 1 | 2 | 1 | 5 | 3 | 3 | 3 | 3  |    |
| EVO | 6 | 5 | 2 | 4 | 6 | 6 | 1 | 3 | 7 | 7 | 2 | 3 | 4 | 1 | 1 | 1 | 7 | 1 | 1 | 2 | 2 |    | 1 | 2 | 1 | 6 | 6 | 1 | 6 | 1  |    |
| EVO | 5 | 5 | 2 | 3 | 6 | 6 | 4 | 4 | 7 | 7 | 1 | 1 | 6 | 1 | 4 | 5 | 2 | 1 | 1 | 1 | 1 |    | 1 | 1 | 1 | 1 | 4 | 2 | 4 | 2  |    |
| EVO | 5 | 4 | 6 | 7 | 6 | 3 | 3 | 5 | 6 | 6 | 2 | 2 | 5 | 5 | 3 | 7 | 6 | 1 | 1 | 1 | 1 |    | 2 | 2 | 1 | 5 | 1 | 6 | 1 | 6  |    |
| EVO | 1 | 1 | 6 | 6 | 5 | 2 | 5 | 2 | 6 | 6 | 2 | 2 | 4 | 1 | 2 | 5 | 5 | 1 | 1 | 1 | 1 |    | 1 | 1 | 1 | 5 | 5 | 1 | 5 | 1  |    |
| EVO | 2 | 1 | 7 | 6 |   |   |   |   | 4 | 7 | 1 | 1 | 6 | 1 |   | 6 | 6 | 1 | 1 | 1 | 4 | 1  | 1 | 2 | 1 |   | 4 | 3 | 4 | 3  |    |
| EVO | 6 | 6 | 2 | 2 | 6 | 6 | 2 | 2 | 7 | 7 | 2 | 5 | 5 | 1 | 2 | 2 | 7 | 1 | 1 | 1 | 1 |    | 2 | 1 | 1 | 5 | 4 | 3 | 4 | 3  |    |
| EVO | 3 | 2 | 4 | 2 | 4 | 4 | 4 | 4 | 4 | 4 | 2 | 7 | 6 | 1 | 4 | 4 | 5 | 1 | 1 | 1 | 1 |    | 1 | 2 | 1 | 2 | 7 | 3 | 7 | 3  |    |
| EVO | 4 | 6 | 5 | 6 | 5 | 6 | 5 | 6 | 5 | 6 | 4 | 4 | 5 | 2 | 4 | 6 | 6 | 1 | 1 | 1 | 5 | 2  | 1 | 5 | 1 | 5 | 4 | 4 | 4 | 4  |    |
| EVO | 2 | 2 | 4 | 5 | 5 | 5 | 5 | 4 | 6 | 6 | 2 | 2 | 4 | 1 | 2 | 7 | 3 | 2 | 4 | 1 | 4 |    | 1 | 2 | 1 | 5 | 3 | 3 | 3 | 3  |    |
| EVO | 3 | 5 | 5 | 6 | 3 | 2 | 6 | 5 | 6 | 7 | 2 | 3 | 4 | 1 | 3 | 6 | 2 | 1 | 1 | 1 | 1 |    | 1 | 1 | 1 | 7 | 5 | 3 | 5 | 3  |    |
| HIS | 1 | 3 | 5 | 6 | 1 | 2 | 3 | 6 | 2 | 7 | 7 | 5 | 4 | 1 | 2 | 7 | 5 | 1 | 1 | 2 | 2 |    | 1 | 2 | 1 | 5 | 6 | 3 | 6 | 3  |    |
| HIS | 4 | 4 | 4 | 4 | 5 | 5 | 3 | 3 | 4 | 6 | 7 | 7 | 6 | 1 | 2 | 5 | 5 | 1 | 1 | 2 | 5 | 1  | 1 | 2 | 1 | 5 | 4 | 4 | 4 | 4  |    |
| HIS | 5 | 5 | 3 | 3 | 4 | 4 | 4 | 4 | 5 | 5 | 7 | 2 | 5 | 1 | 1 | 6 | 6 | 1 | 1 | 2 | 2 |    | 1 | 2 | 1 | 5 | 4 | 2 | 4 | 2  |    |
| HIS | 5 | 4 | 2 | 4 | 5 | 6 | 2 | 2 | 3 | 7 | 3 | 3 | 6 | 1 | 5 | 2 | 6 | 1 | 1 | 1 | 6 | EM |   | 1 | 6 | 1 | 5 | 1 | 5 | EM | EM |

|     |   |   |   |   |   |   |   |   |   |   |   |   |   |   |   |   |   |   |   |   |   |    |   |   |   |   |   |   |    |    |
|-----|---|---|---|---|---|---|---|---|---|---|---|---|---|---|---|---|---|---|---|---|---|----|---|---|---|---|---|---|----|----|
| HIS | 7 | 7 | 1 | 1 | 1 | 1 | 1 | 1 | 4 | 7 | 3 | 3 | 5 | 1 | 1 | 5 | 6 | 1 | 1 | 2 | 5 | 1  | 2 | 4 | 1 | 5 | 3 | 3 | 3  | 3  |
| HIS | 3 | 6 | 2 | 2 | 3 | 6 | 2 | 3 | 5 | 7 | 5 | 6 | 4 | 1 | 4 | 4 | 5 | 1 | 1 | 2 | 6 | EM | 1 | 6 | 1 | 5 | 1 | 5 | EM | EM |
| HIS | 6 | 6 | 2 | 4 | 7 | 5 | 1 | 6 | 3 | 4 | 5 | 6 | 4 | 2 | 2 | 4 | 6 | 1 | 1 | 2 | 5 | 1  | 1 | 5 | 1 | 5 | 3 | 2 | 3  | 2  |
| HIS | 2 | 2 | 6 | 6 | 4 | 4 | 6 | 3 | 4 | 7 | 4 | 2 | 4 | 2 | 2 | 2 | 7 | 1 | 2 | 2 | 1 | 2  | 2 | 1 | 5 | 4 | 1 | 4 | 1  |    |
| HIS | 2 | 2 | 6 | 6 | 3 | 3 | 5 | 5 | 2 | 6 | 5 | 2 | 5 | 1 | 2 | 7 | 4 | 1 | 4 | 2 | 1 | 2  | 1 | 1 | 2 | 4 | 3 | 4 | 3  |    |
| HIS | 4 | 4 | 7 | 4 | 3 | 4 | 6 | 5 | 5 | 6 | 3 | 2 | 6 | 3 | 5 | 4 | 5 | 1 | 2 | 2 | 4 | 5  | 2 | 2 | 1 | 3 | 3 | 7 | 3  | 7  |
| HIS | 5 | 5 | 5 | 3 | 2 | 2 | 7 | 7 | 3 | 6 | 5 | 5 | 3 | 1 | 1 | 5 | 3 | 1 | 4 | 2 | 1 | 1  | 1 | 1 | 5 | 1 | 6 | 1 | 6  |    |
| HIS | 3 | 4 | 3 | 3 | 3 | 4 | 4 | 4 | 4 | 5 | 4 | 4 | 3 | 1 | 4 | 6 | 4 | 1 | 2 | 2 | 1 | 2  | 1 | 2 | 6 | 1 | 3 | 1 | 3  |    |
| HIS | 1 | 1 | 1 | 1 | 4 | 1 | 1 | 7 | 7 | 7 | 4 | 7 | 7 | 1 | 3 | 7 | 5 | 1 | 3 | 2 | 6 | EM | 1 | 6 | 1 | 5 | 3 | 3 | EM | EM |
| HIS | 5 | 5 | 2 | 7 | 5 | 5 | 3 | 7 | 7 | 7 | 7 | 6 | 6 | 1 | 2 | 7 | 1 | 1 | 1 | 2 | 1 | 2  | 1 | 1 | 5 | 2 | 5 | 2 | 5  |    |
| HIS | 2 | 6 | 3 | 3 | 2 | 2 | 2 | 6 | 6 | 7 | 5 | 6 | 6 | 1 | 1 | 2 | 6 | 1 | 1 | 2 | 6 | EM | 1 | 6 | 1 | 5 | 4 | 4 | EM | EM |
| HIS | 5 | 5 | 5 | 5 | 7 | 7 | 4 | 2 | 5 | 7 | 7 | 6 | 6 | 1 | 3 | 5 | 6 | 1 | 1 | 2 | 5 | 1  | 1 | 5 | 1 | 5 | 2 | 6 | 2  | 6  |
| HIS | 3 | 3 | 2 | 3 | 3 | 2 | 2 | 2 | 5 | 7 | 3 | 1 | 5 | 1 | 5 | 7 | 5 | 1 | 1 | 2 | 5 | DK | 2 | 6 | 1 | 5 | 2 | 7 | 2  | 7  |
| HIS | 3 | 4 | 5 | 5 | 3 | 6 | 2 | 3 | 1 | 7 | 4 | 2 | 5 | 1 | 3 | 6 | 5 | 1 | 1 | 2 | 5 | 1  | 1 | 5 | 1 | 5 | 3 | 3 | 3  | 3  |
| HIS | 2 | 2 | 3 | 6 | 1 | 4 | 1 | 6 | 6 | 7 | 7 | 7 | 5 | 1 | 3 | 7 | 6 | 1 | 1 | 2 | 5 | 1  | 2 | 5 | 1 | 5 | 2 | 6 | 2  | 6  |
| HIS | 2 | 2 | 4 | 6 | 3 | 4 | 4 | 5 | 4 | 7 | 4 | 3 | 5 | 2 | 2 | 2 | 6 | 1 | 1 | 2 | 5 | 2  | 1 | 3 | 2 | 5 | 2 | 3 | 2  | 3  |
| HIS | 1 | 1 | 7 | 7 | 5 | 5 | 3 | 2 | 7 | 7 | 7 | 4 | 4 | 1 | 6 | 6 | 4 | 1 | 2 | 2 | 5 | 2  | 2 | 3 | 1 | 3 | 2 | 5 | 2  | 5  |
| HIS | 5 | 5 | 5 | 5 | 5 | 5 | 3 | 5 | 5 | 5 | 6 | 3 | 6 | 1 | 1 | 7 | 5 | 1 | 1 | 2 | 5 | 2  | 1 | 5 | 1 | 5 | 5 | 2 | 5  | 2  |
| HIS | 2 | 5 | 2 | 3 | 4 | 5 | 2 | 6 | 7 | 7 | 7 | 7 | 6 | 1 | 1 | 1 | 6 | 1 | 3 | 2 | 5 | 2  | 1 | 5 | 1 | 5 | 6 | 2 | 6  | 2  |
| HIS | 6 | 5 | 4 | 2 | 6 | 7 | 5 | 5 | 6 | 7 | 7 | 7 | 6 | 3 | 1 | 7 | 4 | 1 | 2 | 2 | 1 | 2  | 1 | 1 | 2 | 4 | 3 | 4 | 3  | 3  |
| HIS | 3 | 3 | 5 | 5 | 4 | 4 | 4 | 5 | 7 | 7 | 2 | 2 | 6 | 1 | 2 | 6 | 5 | 1 | 2 | 2 | 1 | 2  | 1 | 1 | 5 | 3 | 2 | 3 | 2  | 2  |
| HIS | 3 | 5 | 1 | 5 | 5 | 5 | 2 | 2 | 6 | 5 | 6 | 4 | 5 | 1 | 2 | 2 | 6 | 1 | 2 | 2 | 5 | 2  | 1 | 5 | 1 | 5 | 3 | 5 | 3  | 5  |
| HIS | 6 | 3 | 5 | 4 | 4 | 2 | 5 | 7 | 6 | 7 | 6 | 4 | 6 | 1 | 1 | 1 | 7 | 1 | 2 | 2 | 1 | 1  | 3 | 1 | 5 | 1 | 5 | 1 | 5  | 5  |
| HIS | 4 | 4 | 2 | 3 | 2 | 2 | 3 | 3 | 7 | 7 | 7 | 5 | 5 | 1 | 1 | 1 | 7 | 1 | 2 | 1 | 1 | 1  | 1 | 1 | 5 | 1 | 4 | 1 | 4  | 4  |
| HIS | 6 | 6 | 2 | 2 | 5 | 5 | 3 | 3 | 7 | 7 | 6 | 5 | 4 | 1 | 2 | 6 | 5 | 1 | 1 | 1 | 5 | 2  | 2 | 5 | 1 | 5 | 4 | 3 | 4  | 3  |
| HIS | 3 | 3 | 5 | 7 | 4 | 4 | 2 | 4 | 7 | 7 | 7 | 2 | 4 | 1 | 3 | 6 | 5 | 1 | 2 | 1 | 5 | 2  | 2 | 3 | 1 | 5 | 5 | 2 | 5  | 2  |
| HIS | 3 | 2 | 3 | 6 | 3 | 3 | 5 | 6 | 5 | 7 | 7 | 2 | 4 | 1 | 2 | 6 | 5 | 1 | 1 | 1 | 5 | 2  | 1 | 3 | 1 | 5 | 4 | 1 | 4  | 1  |
| HIS | 5 | 3 | 1 | 4 | 6 | 3 | 3 | 4 | 2 | 7 | 6 | 4 | 6 | 1 | 5 | 4 | 5 | 1 | 1 | 1 | 5 | 3  | 2 | 4 | 1 | 6 | 2 | 4 | 2  | 4  |
| HIS | 5 | 5 | 3 | 4 | 6 | 6 | 2 | 2 | 7 | 7 | 6 | 1 | 5 | 1 | 3 | 5 | 4 | 1 | 2 | 1 | 1 | 2  | 4 | 1 | 5 | 3 | 5 | 3 | 5  | 5  |
| HIS | 2 | 2 | 3 | 3 | 3 | 3 | 3 | 2 | 7 | 7 | 7 | 6 | 6 | 1 | 1 | 7 | 6 | 1 | 2 | 1 | 1 | 2  | 4 | 1 | 5 | 3 | 8 | 3 | 8  | 8  |
| HIS | 6 | 5 | 1 | 3 | 3 | 4 | 1 | 5 | 6 | 7 | 6 | 5 | 7 | 1 | 2 | 6 | 6 | 1 | 2 | 1 | 1 | 2  | 2 | 1 | 5 | 1 | 5 | 1 | 5  | 5  |
| HIS | 7 | 7 | 1 | 2 | 4 | 5 | 4 | 4 | 7 | 7 | 7 | 7 | 6 | 1 | 1 | 5 | 4 | 1 | 2 | 2 | 6 | EM | 1 | 6 | 1 | 5 | 1 | 3 | EM | EM |

|     |   |   |   |   |   |   |   |   |   |   |   |   |   |   |   |   |   |   |    |   |   |    |   |   |   |   |   |   |    |    |
|-----|---|---|---|---|---|---|---|---|---|---|---|---|---|---|---|---|---|---|----|---|---|----|---|---|---|---|---|---|----|----|
| HIS | 6 | 5 | 1 | 3 | 6 | 6 | 2 | 2 | 7 | 7 | 7 | 7 | 5 | 1 | 1 | 7 | 6 | 1 | 2  | 2 | 1 | 2  | 1 | 1 | 3 | 2 | 4 | 2 | 4  |    |
| HIS | 1 | 1 | 2 | 7 | 1 | 1 | 5 | 7 | 3 | 5 | 2 | 1 | 2 | 1 | 5 | 6 | 3 | 1 | 2  | 1 | 1 | 1  | 1 | 1 | 1 | 2 | 2 | 2 | 2  |    |
| HIS | 1 | 1 | 3 | 6 | 4 | 4 | 4 | 4 | 6 | 7 | 5 | 3 | 4 | 1 | 3 | 5 | 4 | 1 | 1  | 1 | 1 | 1  | 1 | 5 | 3 | 3 | 3 | 3 |    |    |
| HIS | 2 | 1 | 2 | 6 | 4 | 2 | 4 | 6 | 5 | 6 | 7 | 4 | 5 | 1 | 4 | 3 | 5 | 1 | 1  | 1 | 5 | 2  | 1 | 3 | 2 | 3 | 4 | 3 | 4  |    |
| HIS | 1 | 5 | 1 | 7 | 2 | 2 | 5 | 7 | 7 | 7 | 7 | 3 | 6 | 1 | 1 | 3 | 2 | 1 | 1  | 1 | 1 | 1  | 2 | 2 | 1 | 5 | 2 | 8 | 2  | 8  |
| HIS | 2 | 2 | 7 | 7 | 4 | 4 | 4 | 4 | 6 | 7 | 4 | 2 | 4 | 2 | 4 | 4 | 7 | 1 | 2  | 1 | 4 | 4  | 1 | 2 | 1 | 5 | 4 | 2 | 4  | 2  |
| HIS | 4 | 4 | 3 | 3 | 4 | 4 | 3 | 3 | 6 | 6 | 5 | 6 | 6 | 1 | 1 | 6 | 6 | 1 | 2  | 1 | 1 | 1  | 2 | 2 | 1 | 5 | 1 | 5 | 1  | 5  |
| HIS | 4 | 5 | 3 | 6 | 6 | 5 | 3 | 6 | 4 | 7 | 5 | 2 | 5 | 1 | 3 | 6 | 5 | 1 | 2  | 1 | 1 | 1  | 1 | 1 | 1 | 5 | 2 | 3 | 2  | 3  |
| HIS | 3 | 4 | 6 | 6 | 4 | 4 | 4 | 4 | 7 | 7 | 7 | 7 | 6 | 1 | 1 | 5 | 4 | 1 | 2  | 2 | 6 | CH | 1 | 4 | 1 | 5 | 7 | 1 | 7  | 1  |
| HIS | 5 | 5 | 3 | 3 | 4 | 5 | 3 | 3 | 3 | 7 | 5 | 3 | 5 | 1 | 2 | 6 | 6 | 1 | 1  | 1 | 5 | 2  | 2 | 3 | 2 | 5 | 2 | 4 | 2  | 4  |
| HIS | 1 | 3 | 5 | 4 |   |   |   |   | 5 | 7 | 4 | 4 | 5 | 1 | 1 | 7 | 3 | 1 | 1  | 1 | 2 | 2  | 2 | 2 | 1 | 5 | 4 | 3 | 4  | 3  |
| HIS | 2 | 3 | 6 | 5 | 6 | 5 | 3 | 3 | 6 | 6 | 6 | 2 | 5 | 1 | 5 | 7 | 5 | 1 | 1  | 1 | 1 | 1  | 2 | 2 | 1 | 5 | 4 | 3 | 4  | 3  |
| HIS | 5 | 5 | 3 | 4 | 4 | 4 | 1 | 4 | 6 | 5 | 6 | 6 | 5 | 1 | 1 | 5 | 7 | 1 | 1  | 1 | 6 | EM | 2 | 6 | 1 | 5 | 1 | 4 | EM | EM |
| HIS | 4 | 4 | 5 | 5 | 4 | 5 | 5 | 4 | 5 | 7 | 5 | 4 | 7 | 1 | 2 | 5 | 5 | 1 | 1  | 1 | 5 | 2  | 2 | 4 | 1 | 5 | 2 | 3 | 2  | 3  |
| HIS | 2 | 2 | 4 | 3 | 1 | 2 | 1 | 4 | 4 | 7 | 4 | 1 | 5 | 1 | 2 | 7 | 3 | 1 | 1  | 1 | 1 | 1  | 2 | 2 | 1 | 5 | 3 | 5 | 3  | 5  |
| HIS | 2 | 2 | 6 | 6 | 3 | 2 | 5 | 6 | 6 | 7 | 6 | 6 | 4 | 1 | 1 | 5 | 5 | 1 | 1  | 1 | 1 | 1  | 2 | 2 | 1 | 5 | 4 | 1 | 4  | 1  |
| HIS | 2 | 2 | 6 | 6 | 3 | 3 | 3 | 3 | 7 | 7 | 7 | 7 | 5 | 1 | 5 | 7 | 2 | 1 | 1  | 1 | 1 | 1  | 1 | 3 | 1 | 5 | 4 | 3 | 4  | 3  |
| HIS | 3 | 2 | 6 | 7 | 2 | 2 | 4 | 6 | 6 | 7 | 7 | 5 | 6 | 1 | 1 | 6 | 6 | 1 | 1  | 1 | 1 | 1  | 2 | 1 | 1 | 5 | 2 | 5 | 2  | 5  |
| HIS | 6 | 6 | 3 | 6 | 6 | 6 | 3 | 3 | 6 | 7 | 7 | 5 | 2 | 1 | 1 | 1 | 2 | 1 | 1  | 1 | 6 | RG | 1 | 3 | 1 | 5 |   |   |    |    |
| HIS | 1 | 2 | 6 | 7 | 3 | 4 | 7 | 6 | 4 | 6 | 7 | 6 | 5 | 1 | 2 | 7 | 5 | 1 | 1  | 1 | 5 | 2  | 2 | 5 | 1 | 5 | 4 | 4 | 4  | 4  |
| HIS | 3 | 5 | 5 | 7 | 5 | 5 | 5 | 5 | 6 | 7 | 4 | 5 | 5 | 1 | 4 | 5 | 5 | 1 | 2  | 1 | 4 | 2  | 2 | 2 | 1 | 5 | 2 | 4 | 2  | 4  |
| HIS | 6 | 6 | 3 | 3 | 7 | 4 | 2 | 7 | 6 | 6 | 7 | 7 | 6 | 1 | 1 | 1 | 7 | 1 | DK | 1 | 1 | 1  | 1 | 1 | 5 | 3 | 4 | 3 | 4  |    |
| HIS | 4 | 4 | 3 | 6 | 6 | 5 | 3 | 2 | 5 | 6 | 2 | 1 | 4 | 1 | 2 | 7 | 3 | 1 | 1  | 1 | 1 | 1  | 2 | 1 | 1 | 5 | 1 | 2 | 1  | 2  |
| HIS | 4 | 4 | 4 | 4 | 4 | 3 | 4 | 6 | 3 | 7 | 6 | 2 | 6 | 1 | 4 | 6 | 5 | 1 | 1  | 1 | 1 | 1  | 2 | 2 | 1 | 5 | 2 | 5 | 2  | 5  |
| HIS | 1 | 1 | 2 | 5 | 1 | 1 | 4 | 6 | 6 | 7 | 6 | 6 | 5 | 1 | 1 | 6 | 4 | 1 | 1  | 1 | 1 | 1  | 2 | 1 | 1 | 5 | 3 | 3 | 3  | 3  |
| HIS | 5 | 6 | 3 | 2 | 7 | 6 | 3 | 3 | 4 | 6 | 5 | 3 | 6 | 1 | 2 | 5 | 5 | 1 | 1  | 1 | 1 | 1  | 2 | 2 | 1 | 5 | 3 | 3 | 3  | 3  |
| HIS | 2 | 1 | 6 | 7 | 4 | 4 | 3 | 5 | 4 | 7 | 4 | 2 | 6 | 1 | 5 | 7 | 3 | 1 | 1  | 1 | 1 | 1  | 2 | 2 | 1 | 7 | 4 | 4 | 4  | 4  |
| HIS | 5 | 5 | 4 | 5 | 6 | 6 | 3 | 4 | 6 | 6 | 7 | 3 | 6 | 1 | 3 | 6 | 5 | 1 | 1  | 1 | 1 | 1  | 2 | 1 | 1 | 5 | 1 | 3 | 1  | 3  |
| HIS | 5 | 5 | 3 | 3 | 3 | 5 | 2 | 4 | 6 | 6 | 7 | 5 | 6 | 2 | 2 | 5 | 6 | 1 | 1  | 1 | 1 | 1  | 2 | 1 | 2 | 5 | 4 | 2 | 4  | 2  |
| HIS | 2 | 5 | 3 | 4 | 4 | 5 | 2 | 3 | 6 | 7 | 6 | 4 | 5 | 1 | 1 | 3 | 5 | 1 | 1  | 1 | 1 | 1  | 1 | 3 | 1 | 5 | 1 | 6 | 1  | 6  |
| HIS | 1 | 3 | 2 | 7 | 1 | 1 | 7 | 7 | 6 | 6 | 7 | 6 | 5 | 1 | 2 | 2 | 6 | 1 | 1  | 1 | 5 | 2  | 1 | 4 | 1 | 3 | 3 | 4 | 3  | 4  |
| HIS | 2 | 4 | 3 | 3 | 5 | 5 | 5 | 5 | 3 | 7 | 7 | 5 | 5 | 1 | 3 | 6 | 5 | 1 | 1  | 1 | 1 | 1  | 1 | 1 | 1 | 5 | 4 | 3 | 4  | 3  |

|     |   |   |   |   |   |   |   |   |   |   |   |   |   |   |   |   |   |   |   |   |   |    |   |   |   |   |   |   |    |    |   |
|-----|---|---|---|---|---|---|---|---|---|---|---|---|---|---|---|---|---|---|---|---|---|----|---|---|---|---|---|---|----|----|---|
| HIS | 2 | 3 | 6 | 5 | 2 | 4 | 6 | 5 | 5 | 6 | 5 | 3 | 6 | 2 | 3 | 5 | 5 | 1 | 1 | 1 | 1 | 2  | 1 | 1 | 5 | 3 | 3 | 3 | 3  |    |   |
| HIS | 4 | 5 | 4 | 4 | 5 | 5 | 6 | 4 | 7 | 7 | 5 | 4 | 5 | 1 | 4 | 5 | 5 | 1 | 1 | 1 | 1 | 2  | 1 | 1 | 5 | 2 | 4 | 2 | 4  |    |   |
| HIS | 2 | 2 | 7 | 4 | 1 | 1 | 6 | 4 | 6 | 6 | 3 | 2 | 5 | 1 | 4 | 7 | 4 | 1 | 1 | 1 | 1 | 2  | 1 | 1 | 5 | 1 | 1 | 1 | 1  |    |   |
| HIS | 3 | 3 | 2 | 5 | 4 | 4 | 5 | 3 | 6 | 6 | 5 | 2 | 5 | 1 | 6 | 7 | 3 | 1 | 1 | 1 | 2 | 1  | 2 | 1 | 5 | 5 | 1 | 5 | 1  |    |   |
| HIS | 5 | 7 | 1 | 1 | 5 | 7 | 1 | 1 | 7 | 7 | 7 | 5 | 5 | 1 | 1 | 1 | 7 | 1 | 1 | 1 | 6 | EM | 1 | 5 | 1 | 5 | 1 | 4 | EM | EM |   |
| HIS | 2 | 3 | 5 | 6 | 6 | 6 | 2 | 4 | 3 | 7 | 6 | 5 | 4 | 1 | 6 | 7 | 2 | 1 | 1 | 1 | 1 | 2  | 2 | 1 | 5 | 1 | 6 | 1 | 6  |    |   |
| HIS | 4 | 4 | 4 | 5 | 4 | 4 | 4 | 5 | 4 | 7 | 3 | 3 | 3 | 1 | 2 | 7 | 5 | 1 | 1 | 1 | 5 | 2  | 1 | 5 | 1 | 5 | 3 | 3 | 3  |    |   |
| HIS | 1 | 2 | 7 | 6 | 3 | 2 | 6 | 5 | 6 | 7 | 6 | 5 | 5 | 1 | 1 | 7 | 4 | 1 | 1 | 1 | 1 | 2  | 2 | 1 | 5 | 4 | 2 | 4 | 2  |    |   |
| HIS | 2 | 2 | 2 | 2 | 3 | 2 | 2 | 3 | 7 | 7 | 7 | 3 | 4 | 1 | 7 | 7 | 5 | 1 | 1 | 1 | 5 | 1  | 2 | 5 | 1 | 2 | 3 | 6 | 3  | 6  |   |
| HIS | 2 | 1 | 5 | 6 | 4 | 4 | 4 | 5 | 6 | 7 | 3 | 4 | 6 | 1 | 1 | 7 | 6 | 1 | 2 | 2 | 4 | 4  | 1 | 2 | 1 | 5 | 5 | 1 | 5  | 1  |   |
| HIS | 3 | 2 | 2 | 3 | 3 | 3 | 3 | 4 | 4 | 4 | 4 | 3 | 6 | 1 | 4 | 6 | 4 | 1 | 2 | 2 | 3 | DK | 2 | 2 | 1 | 5 | 3 | 3 | 3  | 3  |   |
| HIS | 5 | 3 | 3 | 6 | 3 | 5 | 3 | 6 | 5 | 7 | 4 | 5 | 5 | 2 | 1 | 6 | 5 | 1 | 1 | 1 | 1 | 1  | 1 | 2 | 1 | 5 | 6 | 2 | 6  | 2  |   |
| HIS | 5 | 5 | 6 | 6 | 5 | 4 | 5 | 7 | 7 | 7 | 7 | 7 | 5 | 1 | 1 | 5 | 7 | 1 | 1 | 1 | 1 | 1  | 1 | 1 | 1 | 1 | 8 | 1 | 8  |    |   |
| HIS | 5 | 5 | 2 | 2 | 4 | 6 | 2 | 3 | 6 | 7 | 5 | 5 | 4 | 1 | 2 | 5 | 4 | 1 | 1 | 1 | 5 | 2  | 1 | 3 | 2 | 5 | 5 | 2 | 5  | 2  |   |
| HIS | 5 | 5 | 2 | 4 |   |   |   |   |   |   |   |   |   |   |   |   |   |   |   |   |   |    |   |   |   |   |   |   |    |    |   |
| HIS | 1 | 1 | 4 | 4 | 4 | 3 | 3 | 5 | 6 | 5 | 6 | 4 | 6 | 1 | 1 | 5 | 4 | 1 | 1 | 1 | 1 | 1  | 1 | 1 | 1 | 4 | 1 | 4 | 1  | 4  |   |
| HIS | 6 | 5 | 2 | 6 | 3 | 4 | 5 | 7 | 5 | 6 | 2 | 5 | 4 | 1 | 4 | 6 | 2 | 1 | 1 | 1 | 5 | 2  | 1 | 5 | 1 | 5 | 3 | 4 | 3  | 4  |   |
| HIS | 2 | 3 | 7 | 4 | 2 | 3 | 6 | 6 | 7 | 7 | 7 | 4 | 6 | 1 | 1 | 4 | 6 | 1 | 1 | 1 | 1 | 1  | 2 | 2 | 1 | 2 | 3 | 5 | 3  | 5  |   |
| HIS | 7 | 4 | 1 | 4 | 2 | 5 | 3 | 3 | 6 | 6 | 4 | 2 | 4 | 1 | 1 | 5 | 5 | 1 | 1 | 1 | 5 | 1  | 1 | 5 | 2 | 5 | 2 | 5 | 2  | 5  |   |
| HIS | 1 | 1 | 5 | 3 | 4 | 4 | 4 | 4 | 7 | 7 | 4 | 4 | 7 | 1 | 3 | 7 | 4 | 1 | 1 | 1 | 6 | RG | 2 | 3 | 1 | 3 | 1 | 8 | 1  | 8  |   |
| HIS | 6 | 6 | 2 | 3 | 5 | 6 | 2 | 5 | 6 | 7 | 7 | 5 | 4 | 1 | 6 | 5 | 3 | 1 | 2 | 1 | 1 | 1  | 1 | 1 | 5 | 2 | 6 | 2 | 6  |    |   |
| HIS | 1 | 3 | 5 | 5 | 1 | 3 | 6 | 3 | 6 | 7 | 5 | 3 | 7 | 1 | 5 | 5 | 5 | 1 | 3 | 1 | 4 | 4  | 2 | 2 | 1 | 5 | 3 | 3 | 3  | 3  |   |
| HIS | 6 | 3 | 4 | 5 | 2 | 4 | 6 | 4 | 5 | 7 | 5 | 2 | 5 | 4 | 2 | 2 | 5 | 1 | 2 | 1 | 1 | 1  | 1 | 1 | 5 | 3 | 3 | 3 | 3  |    |   |
| HIS | 4 | 3 | 4 | 5 | 6 | 6 | 3 | 4 | 6 | 6 | 3 | 4 | 7 | 1 | 2 | 4 | 6 | 1 | 2 | 1 | 1 | 1  | 2 | 2 | 1 | 6 | 4 | 2 | 4  | 2  |   |
| HIS | 5 | 3 | 1 | 5 | 6 | 6 | 2 | 4 | 4 | 7 | 6 | 4 | 4 | 1 | 2 | 3 | 4 | 1 | 3 | 2 | 5 | 6  | 1 | 6 | 1 | 5 |   |   |    |    |   |
| HIS | 5 | 3 | 3 | 3 | 5 | 5 | 6 | 6 | 7 | 7 | 5 | 5 | 4 | 1 | 6 | 7 | 2 | 1 | 2 | 1 | 1 | 1  | 2 | 1 | 5 | 2 | 8 | 2 | 8  |    |   |
| HIS | 6 | 6 | 2 | 5 | 2 | 4 | 5 | 2 | 3 | 6 | 6 | 1 | 5 | 1 | 6 | 4 | 5 | 1 | 4 | 1 | 3 | DK | 1 | 6 | 1 | 5 | 2 | 5 | 2  | 5  |   |
| HIS | 2 | 4 | 1 | 2 | 2 | 2 | 2 | 2 | 6 | 7 | 6 | 6 | 4 | 1 | 1 | 3 | 4 | 1 | 3 | 1 | 5 | 3  | 1 | 4 | 1 | 5 | 4 | 4 | 4  | 4  |   |
| HIS | 6 | 6 | 6 | 6 | 6 | 6 | 6 | 6 | 4 | 5 | 7 | 4 | 6 | 1 | 1 | 6 | 6 | 1 | 3 | 1 | 5 | 2  | 1 | 6 | 1 | 3 | 1 | 5 | 1  | 5  |   |
| HIS | 4 | 4 | 5 | 6 | 4 | 5 | 6 | 6 | 6 | 6 | 6 | 5 | 6 | 2 | 3 | 6 | 6 | 1 | 1 | 2 | 1 | 1  | 1 | 1 | 5 | 2 | 4 | 2 | 4  |    |   |
| HIS | 2 | 2 | 5 | 6 | 4 | 4 | 4 | 4 | 5 | 7 | 7 | 6 | 5 | 1 | 6 | 5 | 4 | 1 | 1 | 2 | 3 | 3  | 3 | 2 | 3 | 1 | 5 | 2 | 4  | 2  | 4 |
| HIS | 6 | 6 | 1 | 2 | 5 | 5 | 1 | 2 | 7 | 7 | 2 | 4 | 4 | 1 | 2 | 4 | 5 | 1 | 1 | 2 | 6 | EM | 1 | 6 | 1 | 5 | 1 | 3 | EM | EM |   |

|     |   |   |   |   |   |   |   |   |   |   |   |   |   |   |   |   |   |   |    |   |    |    |   |   |   |   |   |   |    |    |
|-----|---|---|---|---|---|---|---|---|---|---|---|---|---|---|---|---|---|---|----|---|----|----|---|---|---|---|---|---|----|----|
| HIS | 5 | 5 | 3 | 5 | 5 | 4 | 1 | 5 | 6 | 7 | 4 | 3 | 7 | 1 | 3 | 4 | 5 | 1 | 1  | 2 | 1  | 2  | 1 | 1 | 5 | 2 | 4 | 2 | 4  |    |
| LIN | 3 | 3 | 3 | 4 | 3 | 3 | 3 | 3 | 7 | 7 | 5 | 7 | 4 | 1 | 1 | 3 | 6 | 1 | 1  | 2 | 5  | 2  | 1 | 2 | 1 | 5 | 6 | 2 | 6  | 2  |
| LIN | 4 | 5 | 7 | 4 | 4 | 3 | 7 | 5 | 7 | 7 | 3 | 2 | 7 | 1 | 1 | 3 | 7 | 1 | 1  | 2 | 1  | 1  | 1 | 1 | 5 | 2 | 4 | 2 | 4  |    |
| LIN | 5 | 6 | 1 | 3 | 6 | 7 | 1 | 3 | 6 | 7 | 4 | 4 | 5 | 1 | 1 | 6 | 6 | 1 | 1  | 2 | 5  | 1  | 1 | 5 | 1 | 5 | 4 | 2 | 4  | 2  |
| LIN | 7 | 3 | 1 | 3 | 7 | 3 | 1 | 3 | 7 | 7 | 4 | 4 | 6 | 1 | 2 | 7 | 7 | 1 | 1  | 2 | 5  | 1  | 2 | 6 | 1 | 5 | 4 | 2 | 4  | 2  |
| LIN | 2 | 2 | 3 | 3 | 2 | 2 | 4 | 3 | 5 | 7 | 2 | 3 | 7 | 1 | 1 | 1 | 7 | 2 | 2  | 6 | CP | 1  | 5 | 1 | 3 | 2 | 6 | 2 | 6  |    |
| LIN | 1 | 1 | 4 | 6 | 2 | 2 | 3 | 6 | 7 | 6 | 2 | 2 | 7 | 1 | 3 | 6 | 6 | 1 | 1  | 2 | 1  | 1  | 1 | 1 | 5 | 6 | 2 | 6 | 2  |    |
| LIN | 3 | 3 | 6 | 5 | 3 | 2 | 5 | 5 | 7 | 7 | 1 | 2 | 4 | 1 | 3 | 2 | 6 | 1 | 1  | 2 | 1  | 1  | 1 | 1 | 5 | 3 | 4 | 3 | 4  |    |
| LIN | 2 | 2 | 5 | 5 | 2 | 2 | 7 | 7 | 7 | 7 | 4 | 2 | 7 | 1 | 4 | 7 | 4 | 1 | 1  | 2 | 1  | 2  | 1 | 1 | 5 | 4 | 4 | 4 | 4  |    |
| LIN | 3 | 5 | 1 | 3 | 3 | 4 | 2 | 3 | 7 | 7 | 5 | 2 | 6 | 1 | 4 | 4 | 5 | 1 | 1  | 2 | 1  | 2  | 1 | 1 | 5 | 3 | 4 | 3 | 4  |    |
| LIN | 2 | 3 | 5 | 6 | 4 | 6 | 4 | 5 | 7 | 7 | 3 | 3 | 6 | 1 | 2 | 5 | 6 | 1 | 1  | 2 | 5  | 1  | 2 | 2 | 1 | 5 | 4 | 2 | 4  | 2  |
| LIN | 3 | 4 | 5 | 5 | 4 | 4 | 4 | 4 | 6 | 7 | 6 | 5 | 3 | 1 | 5 | 4 | 5 | 1 | 1  | 2 | 6  | RG | 1 | 2 | 1 | 5 | 1 | 3 | 1  | 3  |
| LIN | 4 | 5 | 5 | 5 | 2 | 3 | 5 | 5 | 7 | 7 | 5 | 3 | 5 | 2 | 2 | 6 | 6 | 1 | 1  | 2 | 1  | 2  | 1 | 1 | 2 | 5 | 2 | 5 | 2  |    |
| LIN | 4 | 4 | 4 | 4 | 4 | 4 | 4 | 3 | 7 | 7 | 5 | 5 | 4 | 1 | 3 | 5 | 6 | 1 | 1  | 2 | 2  | 1  | 2 | 1 | 5 | 3 | 3 | 3 | 3  |    |
| LIN | 4 | 5 | 4 | 6 | 5 | 5 | 5 | 5 | 6 | 6 | 3 | 4 | 6 | 2 | 4 | 5 | 3 | 1 | 1  | 2 | 5  | 1  | 2 | 2 | 1 | 5 | 3 | 3 | 3  | 3  |
| LIN | 5 | 5 | 4 | 5 | 5 | 5 | 4 | 5 | 7 | 6 | 3 | 2 | 6 | 1 | 1 | 6 | 7 | 1 | 2  | 1 | 5  | 1  | 1 | 3 | 1 | 5 | 3 | 3 | 3  | 3  |
| LIN | 1 | 2 | 6 | 7 | 2 | 2 | 6 | 6 | 7 | 7 | 2 | 2 | 5 | 1 | 2 | 2 | 7 | 1 | 2  | 1 | 5  | 1  | 2 | 5 | 1 | 5 | 3 | 7 | 3  | 7  |
| LIN | 7 | 5 | 4 | 5 | 7 | 4 | 5 | 6 | 7 | 7 | 4 | 4 | 6 | 1 | 4 | 6 | 4 | 1 | 1  | 1 | 1  | 1  | 1 | 1 | 5 | 2 | 2 | 2 | 2  | 2  |
| LIN | 4 | 4 | 4 | 4 | 2 | 3 | 4 | 4 | 5 | 6 | 5 | 5 | 7 | 3 | 2 | 4 | 6 | 1 | 1  | 1 | 1  | 1  | 1 | 1 | 2 | 5 | 1 | 5 | 1  | 1  |
| LIN | 6 | 4 | 5 | 3 | 5 | 6 | 2 | 4 | 6 | 4 | 2 | 2 | 6 | 1 | 2 | 2 | 2 | 1 | 3  | 1 | 6  | EM | 1 | 6 | 1 | 5 | 2 | 3 | EM | EM |
| LIN | 5 | 5 | 3 | 4 | 5 | 5 | 2 | 4 | 6 | 6 | 5 | 5 | 6 | 1 | 1 | 2 | 7 | 1 | 1  | 2 | 5  | 1  | 1 | 5 | 1 | 5 | 3 | 4 | 3  | 4  |
| LIN | 7 | 4 | 1 | 6 | 5 | 5 | 2 | 5 | 6 | 6 | 4 | 4 | 5 | 1 | 1 | 5 | 6 | 1 | 2  | 1 | 6  | RG | 1 | 2 | 1 | 5 | 1 | 4 | 1  | 4  |
| LIN | 6 | 6 | 1 | 4 | 6 | 1 | 4 | 5 | 7 | 7 | 4 | 2 | 5 | 2 | 1 | 5 | 5 | 1 | 2  | 1 | 6  | EM | 2 | 5 | 1 | 5 | 1 | 1 | EM | EM |
| LIN | 5 | 5 | 3 | 4 | 5 | 5 | 2 | 5 | 7 | 7 | 4 | 4 | 5 | 1 | 2 | 2 | 6 | 1 | 1  | 1 | 1  | 1  | 2 | 2 | 1 | 5 | 2 | 8 | 2  | 8  |
| LIN | 5 | 7 | 1 | 4 | 3 | 5 | 5 | 6 | 7 | 7 | 7 | 7 | 7 | 1 | 5 | 7 | 7 | 1 | 2  | 1 | 5  | 2  | 2 | 4 | 1 | 2 | 3 | 4 | 3  | 4  |
| LIN | 5 | 4 | 4 | 6 | 3 | 3 | 4 | 5 | 7 | 5 | 3 | 3 | 7 | 1 | 1 | 5 | 6 | 1 | 2  | 1 | 5  | 2  | 2 | 2 | 1 | 5 | 3 | 3 | 3  | 3  |
| LIN | 3 | 5 | 5 | 2 | 6 | 6 | 2 | 2 | 7 | 6 | 3 | 2 | 7 | 1 | 1 | 2 | 7 | 1 | 2  | 1 | 4  | 1  | 1 | 2 | 1 | 5 | 2 | 3 | 2  | 3  |
| LIN | 7 | 7 | 1 | 7 | 7 | 6 | 5 | 2 | 7 | 5 | 1 | 1 | 5 | 1 | 1 | 1 | 7 | 1 | DK | 1 | 6  | EM | 1 | 6 | 1 | 5 |   |   | EM | EM |
| LIN | 3 | 5 | 2 | 5 | 4 | 4 | 2 | 5 | 6 | 7 | 3 | 2 | 5 | 1 | 2 | 5 | 6 | 1 | 1  | 1 | 4  | 1  | 1 | 3 | 1 | 5 | 6 | 2 | 6  | 2  |
| LIN | 5 | 6 | 2 | 5 | 3 | 3 | 1 | 4 | 7 | 7 | 2 | 2 | 7 | 1 | 1 | 5 | 7 | 1 | 1  | 1 | 5  | 2  | 1 | 5 | 1 | 5 | 3 | 4 | 3  | 4  |
| LIN | 5 | 5 | 3 | 3 | 3 | 3 | 5 | 5 | 7 | 7 | 2 | 2 | 4 | 1 | 1 | 4 | 7 | 1 | 1  | 1 | 1  | 1  | 1 | 1 | 1 | 5 | 4 | 1 | 4  | 1  |
| LIN | 2 | 2 | 6 | 7 | 3 | 2 | 5 | 6 | 7 | 7 | 4 | 2 | 6 | 1 | 2 | 3 | 5 | 1 | 1  | 1 | 1  | 1  | 2 | 1 | 1 | 6 | 4 | 4 | 4  | 4  |

|     |   |   |   |   |   |   |   |   |   |   |   |   |   |   |   |   |   |   |    |   |   |    |   |   |   |   |   |   |    |    |
|-----|---|---|---|---|---|---|---|---|---|---|---|---|---|---|---|---|---|---|----|---|---|----|---|---|---|---|---|---|----|----|
| LIN | 6 | 2 | 1 | 6 | 7 | 1 | 7 | 5 | 7 | 7 | 7 | 7 | 6 | 1 | 3 | 7 | 4 | 1 | 1  | 1 | 1 | 2  | 1 | 1 | 5 | 4 | 2 | 4 | 2  |    |
| LIN | 5 | 5 | 5 | 4 | 5 | 5 | 6 | 6 | 7 | 7 | 2 | 3 | 6 | 1 | 3 | 5 | 5 | 1 | 2  | 2 | 2 | 1  | 2 | 2 | 5 | 5 | 2 | 5 | 2  |    |
| LIN | 5 | 5 | 3 | 6 | 4 | 4 | 3 | 6 | 7 | 7 | 4 | 5 | 5 | 1 | 1 | 1 | 7 | 1 | 1  | 2 | 1 | 2  | 2 | 2 | 2 | 2 | 2 | 2 | 2  |    |
| LIN | 2 | 2 | 6 | 7 | 3 | 4 | 2 | 6 | 7 | 7 | 6 | 7 | 5 | 1 | 2 | 1 | 7 | 1 | 1  | 2 | 1 | 2  | 1 | 5 | 5 | 2 | 5 | 2 |    |    |
| LIN | 5 | 5 | 3 | 3 | 5 | 5 | 3 | 3 | 7 | 7 | 1 | 4 | 4 | 4 | 2 | 5 | 7 | 1 | DK | 2 | 1 | 1  | 1 | 5 | 4 | 3 | 4 | 3 |    |    |
| LIN | 5 | 5 | 2 | 4 | 5 | 5 | 2 | 4 | 7 | 6 | 3 | 4 | 6 | 1 | 3 | 5 | 5 | 1 | 1  | 2 | 1 | 2  | 1 | 5 | 4 | 2 | 4 | 2 |    |    |
| LIN | 5 | 5 | 5 | 7 | 5 | 5 | 5 | 6 | 7 | 7 | 5 | 5 | 6 | 1 | 5 | 5 | 5 | 1 | 1  | 2 | 1 | 2  | 1 | 5 | 4 | 2 | 4 | 2 |    |    |
| LIN | 4 | 3 | 2 | 4 | 4 | 5 | 3 | 4 | 6 | 6 | 5 | 3 | 6 | 1 | 1 | 1 | 7 | 1 | 2  | 2 | 6 | EM | 2 | 6 | 1 | 5 | 1 | 1 | EM | EM |
| MAT | 1 | 2 | 6 | 6 | 4 | 4 | 5 | 4 | 7 | 7 | 2 | 2 | 5 | 1 | 1 | 5 | 7 | 1 | 1  | 1 | 2 | 1  | 1 | 1 | 5 | 5 | 1 | 5 | 1  |    |
| MAT | 2 | 2 | 6 | 6 | 6 | 6 | 2 | 2 | 7 | 7 | 1 | 1 | 3 | 1 | 3 | 3 | 3 | 1 | 1  | 1 | 1 | 1  | 1 | 1 | 5 | 2 | 3 | 2 | 3  |    |
| MAT | 6 | 6 | 2 | 2 | 6 | 6 | 4 | 4 | 7 | 7 | 1 | 1 | 4 | 1 | 1 | 6 | 6 | 1 | 1  | 1 | 1 | 1  | 1 | 1 | 4 | 4 | 4 | 4 | 4  |    |
| MAT | 5 | 7 | 1 | 3 | 5 | 6 | 2 | 2 | 4 | 5 | 2 | 2 | 2 | 2 | 2 | 6 | 6 | 1 | 1  | 2 | 5 | 2  | 1 | 6 | 1 | 5 | 2 | 4 | 2  | 4  |
| MAT | 3 | 3 | 3 | 4 | 3 | 3 | 3 | 4 | 7 | 7 | 2 | 2 | 2 | 2 | 2 | 2 | 5 | 1 | 1  | 1 | 1 | 1  | 2 | 1 | 1 | 5 | 1 | 2 | 1  | 2  |
| MAT | 5 | 4 | 4 | 3 | 5 | 4 | 4 | 3 | 6 | 6 | 2 | 3 | 3 | 1 | 2 | 6 | 5 | 1 | 1  | 1 | 5 | DK | 1 | 5 | 1 | 5 | 6 | 4 | 6  | 4  |
| MAT | 5 | 5 | 2 | 2 | 6 | 5 | 1 | 2 | 7 | 5 | 4 | 3 | 2 | 1 | 4 | 6 | 3 | 1 | 1  | 2 | 5 | 2  | 1 | 4 | 1 | 5 | 1 | 5 | 1  | 5  |
| MAT | 6 | 5 | 2 | 3 | 5 | 3 | 2 | 5 | 7 | 6 | 1 | 2 | 4 | 2 | 2 | 6 | 5 | 1 | 1  | 1 | 1 | 1  | 1 | 1 | 5 | 1 | 2 | 1 | 2  |    |
| MAT | 6 | 6 | 1 | 4 | 4 | 4 | 2 | 4 | 7 | 6 | 2 | 3 | 2 | 3 | 3 | 3 | 4 | 1 | 1  | 1 | 1 | 1  | 1 | 1 | 5 | 2 | 4 | 2 | 4  |    |
| MAT | 2 | 1 | 2 | 7 | 3 | 4 | 2 | 6 | 7 | 7 | 1 | 2 | 3 | 1 | 2 | 3 | 6 | 1 | 1  | 1 | 1 | 1  | 1 | 1 | 5 | 2 | 3 | 2 | 3  |    |
| MAT | 4 | 3 | 3 | 5 | 3 | 2 | 6 | 7 | 7 | 7 | 1 | 1 | 2 | 1 | 4 | 6 | 3 | 1 | 2  | 1 | 1 | 1  | 1 | 1 | 5 | 3 | 3 | 3 | 3  |    |
| MAT | 7 | 7 | 1 | 1 | 7 | 7 | 1 | 1 | 7 | 7 | 2 | 2 | 2 | 1 | 1 | 1 | 2 | 1 | 1  | 2 | 5 | 2  | 1 | 6 | 1 | 5 | 4 | 8 | 4  | 8  |
| MAT | 7 | 6 | 3 | 7 | 6 | 6 | 3 | 7 | 7 | 7 | 7 | 3 | 4 | 4 | 5 | 4 | 5 | 1 | 1  | 1 | 1 | 1  | 1 | 1 | 2 | 4 | 3 | 4 | 3  |    |
| MAT | 7 | 2 | 1 | 1 | 7 | 7 | 1 | 1 | 7 | 2 | 2 | 2 | 3 | 1 | 3 | 4 | 5 | 1 | 1  | 2 | 5 | 1  | 1 | 6 | 1 | 5 | 4 | 2 | 4  | 2  |
| MAT | 3 | 3 | 7 | 7 | 3 | 3 | 7 | 7 | 7 | 7 | 1 | 1 | 4 | 1 | 4 | 7 | 7 | 1 | 4  | 1 | 1 | 1  | 1 | 1 | 5 | 6 | 1 | 6 | 1  |    |
| MAT | 7 | 3 | 3 | 6 | 6 | 4 | 3 | 6 | 7 | 7 | 1 | 1 | 3 | 1 | 1 | 1 | 7 | 1 | 1  | 1 | 1 | 1  | 1 | 1 | 5 | 4 | 4 | 4 | 4  |    |
| MAT | 5 | 6 | 5 | 4 | 7 | 7 | 5 | 4 | 7 | 7 | 3 | 3 | 3 | 3 | 5 | 6 | 3 | 1 | 1  | 1 | 1 | 1  | 1 | 1 | 4 | 2 | 3 | 2 | 3  |    |
| MAT | 5 | 7 | 1 | 4 | 7 | 7 | 1 | 1 | 4 | 4 | 2 | 1 | 3 | 1 | 5 | 5 | 5 | 1 | 1  | 1 | 5 | 4  | 1 | 6 | 1 | 5 | 3 | 4 | 3  | 4  |
| MAT | 7 | 7 | 5 | 3 | 7 | 7 | 1 | 3 | 7 | 7 | 1 | 1 | 2 | 2 | 3 | 4 | 4 | 1 | 1  | 1 | 1 | 1  | 1 | 1 | 5 | 3 | 2 | 3 | 2  |    |
| MAT | 7 | 7 | 1 | 1 | 7 | 7 | 1 | 1 | 7 | 7 | 1 | 1 | 2 | 3 | 4 | 5 | 2 | 1 | 1  | 2 | 5 | 2  | 1 | 4 | 1 | 6 | 5 | 6 | 5  | 6  |
| MAT | 6 | 6 | 2 | 3 | 6 | 6 | 2 | 3 | 7 | 6 | 2 | 2 | 2 | 2 | 4 | 5 | 4 | 1 | 1  | 1 | 5 | 1  | 1 | 2 | 1 | 5 | 8 | 2 | 8  | 2  |
| MAT | 6 | 6 | 4 | 2 | 7 | 7 | 1 | 1 | 7 | 7 | 1 | 1 | 3 | 1 | 6 | 7 | 4 | 1 | 1  | 1 | 1 | 1  | 2 | 1 | 1 | 5 | 5 | 2 | 5  | 2  |
| MAT | 7 | 5 | 4 | 5 | 6 | 7 | 2 | 3 | 6 | 7 | 3 | 3 | 3 | 1 | 3 | 5 | 5 | 1 | 1  | 1 | 1 | 1  | 1 | 1 | 5 | 4 | 2 | 4 | 2  |    |
| MAT | 7 | 7 | 1 | 1 | 7 | 7 | 1 | 1 | 4 | 7 | 1 | 1 | 2 | 1 | 1 | 5 | 4 | 1 | 1  | 1 | 1 | 1  | 1 | 1 | 5 | 2 | 3 | 2 | 3  |    |



|     |   |   |   |   |   |   |   |   |   |   |   |   |   |   |   |   |   |   |   |   |   |    |   |   |   |   |   |   |   |    |    |
|-----|---|---|---|---|---|---|---|---|---|---|---|---|---|---|---|---|---|---|---|---|---|----|---|---|---|---|---|---|---|----|----|
| MAT | 6 | 5 | 1 | 4 | 6 | 6 | 1 | 4 | 7 | 7 | 4 | 4 | 2 | 2 | 3 | 2 | 6 | 1 | 1 | 2 | 5 | 3  | 1 | 3 | 1 | 5 | 3 | 4 | 3 | 4  |    |
| MAT | 7 | 6 | 2 | 5 | 6 | 6 | 2 | 4 | 7 | 7 | 1 | 1 | 3 | 4 | 6 | 5 | 5 | 1 | 1 | 1 | 1 |    | 1 | 1 | 2 | 6 | 6 | 1 | 6 | 1  |    |
| MAT | 5 | 3 | 3 | 5 | 5 | 3 | 2 | 7 | 7 | 7 | 1 | 1 | 4 | 1 | 4 | 5 | 4 | 1 | 1 | 2 | 3 | DK | 1 | 2 | 1 | 5 | 4 | 2 | 4 | 2  |    |
| MAT | 3 | 1 | 6 | 5 | 5 | 5 | 3 | 3 | 7 | 7 | 1 | 2 | 4 | 1 | 1 | 1 | 7 | 1 | 1 | 1 | 1 |    | 1 | 1 | 1 | 5 | 2 | 3 | 2 | 3  |    |
| MAT | 5 | 3 | 1 | 6 | 5 | 5 | 1 | 6 | 6 | 7 | 2 | 1 | 4 | 1 | 5 | 5 | 4 | 1 | 1 | 1 | 6 | EM |   | 1 | 4 | 1 | 2 | 4 | 8 | EM | EM |
| MAT | 3 | 4 | 3 | 6 | 6 | 6 | 2 | 4 | 7 | 7 | 2 | 2 | 3 | 1 | 2 | 5 | 6 | 1 | 1 | 1 | 5 | 3  | 1 | 5 | 1 | 1 | 3 | 6 | 3 | 6  |    |
| MAT | 3 | 3 | 4 | 7 | 4 | 7 | 2 | 7 | 7 | 7 | 1 | 1 | 5 | 1 | 1 | 1 | 7 | 1 | 1 | 1 | 1 |    | 2 | 1 | 1 | 2 | 7 | 1 | 7 | 1  |    |
| MAT | 5 | 5 | 5 | 5 | 6 | 5 | 3 | 5 | 5 | 5 | 5 | 5 | 4 | 4 | 4 | 5 | 4 | 1 | 1 | 1 | 5 | 6  | 2 | 3 | 1 | 5 | 8 | 4 | 8 | 4  |    |
| MAT | 6 | 6 | 2 | 3 | 5 | 6 | 2 | 3 | 7 | 6 | 4 | 2 | 3 | 2 | 4 | 4 | 4 | 1 | 1 | 1 | 3 | DK | 1 | 5 | 1 | 5 | 2 | 4 | 2 | 4  |    |
| MAT | 2 | 2 | 6 | 6 | 3 | 3 | 5 | 7 | 7 | 7 | 1 | 1 | 4 | 1 | 1 | 5 | 5 | 1 | 1 | 2 | 1 |    | 1 | 1 | 1 | 5 | 5 | 2 | 5 | 2  |    |
| MAT | 2 | 2 | 6 | 6 | 6 | 6 | 2 | 2 | 7 | 7 | 2 | 2 | 3 | 1 | 5 | 6 | 5 | 1 | 1 | 2 | 1 |    | 2 | 1 | 1 | 5 | 4 | 1 | 4 | 1  |    |
| MAT | 3 | 3 | 5 | 5 | 3 | 3 | 5 | 5 | 6 | 5 | 4 | 2 | 1 | 5 | 6 | 2 | 7 | 1 | 1 | 2 | 1 |    | 1 | 1 | 1 | 2 | 1 | 5 | 1 | 5  |    |
| MAT | 1 | 1 | 7 | 7 | 5 | 3 | 3 | 5 | 5 | 6 | 1 | 1 | 3 | 1 | 2 | 5 | 5 | 1 | 1 | 2 | 1 |    | 1 | 1 | 1 | 5 | 5 | 1 | 5 | 1  |    |
| MAT | 1 | 1 | 7 | 7 | 3 | 3 | 5 | 5 | 7 | 7 | 3 | 1 | 3 | 4 | 1 | 4 | 4 | 1 | 1 | 2 | 1 |    | 1 | 1 | 1 |   | 1 | 2 | 1 | 2  |    |
| MAT | 1 | 4 | 6 | 7 | 7 | 4 | 6 | 7 | 7 | 7 | 1 | 1 | 2 | 1 | 1 | 1 | 5 | 1 | 1 | 2 | 1 |    | 1 | 1 | 1 | 5 | 8 | 1 | 8 | 1  |    |
| MAT | 7 | 5 | 1 | 7 | 6 | 5 | 2 | 5 | 7 | 5 | 1 | 1 | 2 | 4 | 2 | 7 | 6 | 1 | 1 | 2 | 1 |    | 1 | 1 | 1 | 5 | 3 | 3 | 3 | 3  |    |
| MAT | 5 | 5 | 2 | 5 | 5 | 5 | 2 | 5 | 7 | 7 | 2 | 1 | 3 | 2 | 2 | 4 | 4 | 1 | 1 | 2 | 2 |    | 1 | 1 | 1 | 5 | 3 | 2 | 3 | 2  |    |
| MAT | 2 | 2 | 5 | 6 | 4 | 3 | 4 | 5 | 7 | 7 | 2 | 2 | 3 | 1 | 3 | 6 | 4 | 1 | 1 | 2 | 1 |    | 1 | 1 | 1 | 5 | 2 | 5 | 2 | 5  |    |
| MAT | 2 | 5 | 2 | 5 | 2 | 5 | 2 | 5 | 6 | 7 | 2 | 3 | 2 | 4 | 5 | 6 | 4 | 1 | 1 | 2 | 1 |    | 1 | 1 | 1 | 5 | 2 | 4 | 2 | 4  |    |
| MAT | 4 | 5 | 2 | 4 | 4 | 6 | 2 | 5 | 7 | 7 | 1 | 2 | 5 | 4 | 1 | 5 | 6 | 1 | 1 | 2 | 2 |    | 1 | 2 | 1 | 5 | 4 | 3 | 4 | 3  |    |
| MAT | 6 | 5 | 5 | 5 | 6 | 6 | 6 | 6 | 7 | 7 | 2 | 1 | 2 | 4 | 4 | 2 | 6 | 1 | 1 | 1 | 5 | DK | 1 | 4 | 1 | 5 | 5 | 2 | 5 | 2  |    |
| MAT | 6 | 6 | 4 | 4 | 7 | 6 | 2 | 2 | 7 | 6 | 2 | 2 | 4 | 3 | 4 | 6 | 2 | 1 | 1 | 2 | 5 | 2  | 1 | 4 | 1 | 5 | 5 | 1 | 5 | 1  |    |
| MAT | 6 | 6 | 2 | 2 | 7 | 7 | 1 | 1 | 7 | 7 | 2 | 2 | 3 | 1 | 3 | 7 | 3 | 1 | 1 | 1 | 5 | 1  | 1 | 5 | 1 | 5 | 4 | 1 | 4 | 1  |    |
| MAT | 2 | 5 | 3 | 3 | 2 | 5 | 2 | 3 | 7 | 7 | 2 | 2 | 3 | 1 | 5 | 5 | 3 | 1 | 1 | 1 | 5 | 3  | 1 | 5 | 1 | 5 | 4 | 2 | 4 | 2  |    |
| MAT | 5 | 5 | 4 | 5 | 7 | 7 | 1 | 2 | 7 | 7 | 2 | 2 | 3 | 1 | 4 | 4 | 4 | 1 | 1 | 1 | 1 |    | 1 | 2 | 1 | 5 | 4 | 3 | 4 | 3  |    |
| MAT | 7 | 7 | 1 | 1 | 7 | 1 | 1 | 7 | 7 | 6 | 2 | 3 | 2 | 7 | 5 | 3 | 7 | 1 | 1 | 1 | 1 |    | 1 | 1 | 1 | 2 | 5 | 1 | 5 | 1  |    |
| MAT | 6 | 4 | 4 | 6 | 4 | 4 | 2 | 4 | 7 | 7 | 4 | 3 | 3 | 6 | 6 | 6 | 6 | 1 | 1 | 1 | 1 |    | 1 | 1 | 1 | 2 | 5 | 2 | 5 | 2  |    |
| MAT | 6 | 6 | 3 | 6 | 6 | 6 | 3 | 6 | 7 | 7 | 4 | 4 | 4 | 4 | 5 | 4 | 5 | 1 | 2 | 1 | 1 |    | 1 | 2 | 1 | 5 | 3 | 1 | 3 | 1  |    |
| MAT | 6 | 5 | 3 | 3 | 7 | 7 | 2 | 2 | 7 | 6 | 2 | 2 | 4 | 1 | 5 | 3 | 5 | 1 | 1 | 1 | 1 |    | 1 | 2 | 1 | 5 | 2 | 5 | 2 | 5  |    |
| MAT | 3 | 6 | 2 | 2 | 6 | 6 | 2 | 2 | 6 | 6 | 2 | 2 | 2 | 4 | 5 | 3 | 5 | 1 | 1 | 1 | 5 | 2  | 1 | 4 | 1 | 5 | 5 | 1 | 5 | 1  |    |
| MAT | 7 | 7 | 1 | 1 | 7 | 7 | 1 | 1 | 7 | 6 | 1 | 1 | 3 | 1 | 1 | 6 | 1 | 1 | 1 | 2 | 5 | 2  | 1 | 6 | 1 | 5 | 3 | 7 | 3 | 7  |    |
| MAT | 6 | 5 | 2 | 4 | 6 | 5 | 2 | 4 | 7 | 6 | 2 | 2 | 3 | 1 | 6 | 7 | 3 | 1 | 2 | 2 | 1 |    | 2 | 1 | 1 | 5 | 4 | 3 | 4 | 3  |    |

|     |   |   |   |   |   |   |   |   |   |   |   |   |   |   |   |   |   |   |   |   |   |    |   |   |   |   |   |   |   |   |   |
|-----|---|---|---|---|---|---|---|---|---|---|---|---|---|---|---|---|---|---|---|---|---|----|---|---|---|---|---|---|---|---|---|
| MAT | 3 | 4 | 3 | 5 | 3 | 3 | 4 | 5 | 6 | 7 | 4 | 3 | 3 | 5 | 6 | 3 | 5 | 1 | 3 | 1 | 1 | 2  | 1 | 1 | 2 | 6 | 3 | 6 | 3 |   |   |
| MAT | 3 | 5 | 5 | 3 | 2 | 3 | 5 | 3 | 7 | 7 | 1 | 1 | 3 | 1 | 2 | 6 | 4 | 1 | 2 | 2 | 1 |    |   |   |   | 4 | 2 | 4 | 2 |   |   |
| MAT | 5 | 4 | 1 | 7 | 5 | 5 | 1 | 7 | 7 | 7 | 2 | 2 | 3 | 1 | 5 | 5 | 4 | 1 | 2 | 2 | 5 | 4  | 1 | 5 | 1 | 5 | 4 | 2 | 4 | 2 |   |
| MAT | 3 | 4 | 1 | 6 | 6 | 5 | 1 | 5 | 7 | 7 | 1 | 1 | 3 | 1 | 2 | 6 | 5 | 1 | 1 | 2 | 5 | 1  | 1 | 3 | 1 | 5 | 5 | 1 | 5 | 1 |   |
| MAT | 7 | 7 | 1 | 1 | 7 | 7 | 1 | 1 | 7 | 7 | 1 | 1 | 3 | 1 | 1 | 1 | 7 | 1 | 2 | 2 | 5 | 2  | 1 | 4 | 1 | 5 | 3 | 4 | 3 | 4 |   |
| MAT | 6 | 5 | 1 | 3 | 4 | 4 | 4 | 4 | 7 | 7 | 2 | 2 | 4 | 6 | 4 | 2 | 3 | 1 | 1 | 1 | 1 |    | 2 | 1 | 1 | 5 | 4 | 1 | 4 | 1 |   |
| MAT | 6 | 2 | 2 | 6 | 6 | 2 | 2 | 6 | 7 | 6 | 1 | 2 | 4 | 3 | 2 | 4 | 5 | 1 | 2 | 2 | 1 |    | 1 | 3 | 1 | 5 | 3 | 2 | 3 | 2 |   |
| MAT | 7 | 5 | 1 | 5 | 7 | 3 | 1 | 5 | 6 | 6 | 1 | 1 | 3 | 2 | 4 | 6 | 3 | 1 | 2 | 2 | 5 | 3  | 1 | 6 | 1 | 5 | 3 | 3 | 3 | 3 |   |
| MAT | 6 | 5 | 3 | 6 | 6 | 5 | 3 | 5 | 7 | 7 | 2 | 3 | 2 | 4 | 4 | 6 | 4 | 1 | 2 | 2 | 1 |    | 1 | 1 | 1 | 5 | 4 | 3 | 4 | 3 |   |
| MAT | 3 | 3 | 6 | 6 | 3 | 3 | 5 | 5 | 7 | 7 | 2 | 2 | 2 | 1 | 1 | 4 | 3 | 2 | 2 | 2 | 6 | IN |   | 1 | 2 | 1 | 5 | 5 | 1 | 5 | 1 |
| MAT | 4 | 6 | 5 | 2 | 5 | 6 | 2 | 4 | 7 | 5 | 1 | 4 | 2 | 3 | 3 | 4 | 4 | 1 | 1 | 1 | 1 |    | 1 | 1 | 1 | 5 | 2 | 5 | 2 | 5 |   |
| MAT | 4 | 3 | 4 | 5 | 3 | 3 | 5 | 6 | 5 | 7 | 1 | 3 | 3 | 5 | 7 | 5 | 3 | 1 | 2 | 1 | 1 |    | 1 | 1 | 2 | 5 | 1 | 1 | 1 | 1 |   |
| MAT | 6 | 6 | 2 | 3 | 6 | 6 | 3 | 3 | 6 | 6 | 2 | 2 | 2 | 2 | 4 | 5 | 6 | 1 | 1 | 1 | 5 | 7  | 1 | 6 | 1 | 5 | 4 | 4 | 4 | 4 |   |
| MAT | 5 | 5 | 3 | 1 | 5 | 5 | 1 | 3 | 6 | 6 | 1 | 1 | 3 | 1 | 4 | 6 | 2 | 1 | 3 | 2 | 5 | 6  | 1 | 4 | 1 | 2 | 8 | 3 | 8 | 3 |   |
| MAT | 3 | 3 | 7 | 6 | 5 | 5 | 4 | 4 | 5 | 5 | 1 | 1 | 4 | 1 | 4 | 2 | 6 | 1 | 1 | 1 | 1 |    | 1 | 1 | 1 | 2 | 2 | 3 | 2 | 3 |   |
| MAT | 3 | 4 | 4 | 5 | 3 | 3 | 5 | 4 | 5 | 7 | 1 | 1 | 3 | 6 | 5 | 4 | 4 | 1 | 1 | 2 | 1 |    | 2 | 1 | 1 | 2 | 1 | 1 | 1 | 1 |   |
| MAT | 5 | 5 | 3 | 3 | 6 | 6 | 2 | 2 | 6 | 6 | 4 | 4 | 4 | 2 | 6 | 5 | 3 | 1 | 3 | 2 | 3 | DK | 2 | 4 | 1 | 5 | 3 | 2 | 3 | 2 |   |
| MAT | 2 | 2 | 5 | 6 | 6 | 6 | 2 | 6 | 7 | 7 | 2 | 2 | 4 | 1 | 1 | 1 | 6 | 1 | 1 | 2 | 3 | DK | 1 | 3 | 1 | 5 | 5 | 1 | 5 | 1 |   |
| MAT | 7 | 5 | 1 | 2 | 6 | 7 | 2 | 2 | 7 | 7 | 1 | 1 | 2 | 2 | 1 | 5 | 6 | 1 | 1 | 2 | 1 |    | 2 | 1 | 1 | 5 | 1 | 2 | 1 | 2 |   |
| MAT | 2 | 3 | 4 | 7 | 4 | 5 | 2 | 6 | 5 | 6 | 1 | 2 | 4 | 1 | 4 | 6 | 3 | 1 | 1 | 1 | 1 |    | 1 | 1 | 1 | 5 | 3 | 2 | 3 | 2 |   |
| MAT | 5 | 5 | 5 | 5 | 4 | 4 | 4 | 4 | 5 | 6 | 2 | 2 | 5 | 6 | 5 | 4 | 4 | 1 | 1 | 2 | 1 |    | 2 | 2 | 1 | 5 | 5 | 4 | 5 | 4 |   |
| MAT | 4 | 5 | 6 | 6 | 5 | 5 | 6 | 6 | 7 | 7 | 2 | 2 | 3 | 2 | 4 | 4 | 5 | 1 | 1 | 1 | 1 |    | 1 | 1 | 1 | 5 | 4 | 2 | 4 | 2 |   |
| MAT | 4 | 4 | 4 | 6 | 6 | 6 | 3 | 3 | 7 | 7 | 1 | 1 | 2 | 1 | 2 | 2 | 4 | 1 | 2 | 2 | 1 |    | 1 | 1 | 1 | 5 | 3 | 2 | 3 | 2 |   |
| MAT | 2 | 3 | 3 | 7 | 2 | 3 | 3 | 7 | 7 | 7 | 4 | 4 | 1 | 1 | 5 | 6 | 3 | 1 | 1 | 1 | 1 |    | 2 | 1 | 1 | 7 | 1 | 2 | 1 | 2 |   |
| MAT | 7 | 7 | 4 | 3 | 7 | 7 | 4 | 3 | 7 | 7 | 1 | 1 | 2 | 1 | 4 | 3 | 5 | 1 | 1 | 1 | 5 | 4  | 1 | 3 | 1 | 2 | 4 | 5 | 4 | 5 |   |
| MAT | 5 | 2 | 2 | 4 | 6 | 6 | 1 | 4 | 7 | 7 | 2 | 2 | 3 | 1 | 3 | 5 | 3 | 1 | 2 | 1 | 4 | DK | 2 | 2 | 1 | 5 | 1 | 4 | 1 | 4 |   |
| MAT | 6 | 5 | 1 | 4 | 7 | 6 | 1 | 2 | 7 | 7 | 2 | 3 | 2 | 4 | 5 | 5 | 3 | 1 | 1 | 1 | 5 | 2  | 1 | 5 | 1 | 5 | 3 | 2 | 3 | 2 |   |
| MAT | 6 | 2 | 2 | 5 | 6 | 3 | 2 | 5 | 7 | 7 | 1 | 1 | 4 | 5 | 3 | 7 | 3 | 1 | 1 | 2 | 1 |    | 1 | 1 | 1 | 5 | 3 | 3 | 3 | 3 |   |
| MAT | 6 | 4 | 6 | 6 | 6 | 6 | 3 | 3 | 7 | 7 | 1 | 1 | 4 | 1 | 6 | 6 | 3 | 1 | 1 | 1 | 1 |    | 2 | 1 | 1 | 2 | 8 | 1 | 8 | 1 |   |
| MAT | 6 | 6 | 2 | 5 | 7 | 7 | 2 | 3 | 7 | 7 | 2 | 4 | 3 | 2 | 2 | 6 | 3 | 1 | 1 | 1 | 1 |    | 1 | 1 | 1 | 5 | 4 | 3 | 4 | 3 |   |
| MAT | 5 | 4 | 4 | 6 | 4 | 4 | 4 | 6 | 7 | 7 | 1 | 1 | 4 | 3 | 2 | 5 | 6 | 1 | 1 | 1 | 1 |    | 1 | 1 | 1 | 5 | 3 | 4 | 3 | 4 |   |
| MAT | 3 | 3 | 4 | 7 | 5 | 5 | 4 | 6 | 7 | 7 | 2 | 2 | 3 | 1 | 1 | 5 | 4 | 1 | 1 | 1 | 1 |    | 2 | 1 | 2 | 5 | 3 | 3 | 3 | 3 |   |

|     |   |   |   |   |   |   |   |   |   |   |   |   |   |   |   |   |   |   |   |   |   |    |    |   |   |   |   |   |    |    |    |   |
|-----|---|---|---|---|---|---|---|---|---|---|---|---|---|---|---|---|---|---|---|---|---|----|----|---|---|---|---|---|----|----|----|---|
| MAT | 5 | 3 | 3 | 3 | 5 | 5 | 3 | 3 | 7 | 7 | 2 | 2 | 2 | 2 | 2 | 7 | 5 | 1 | 1 | 1 | 1 | 1  | 1  | 1 | 1 | 1 | 1 | 7 | 2  | 3  | 2  | 3 |
| MAT | 5 | 6 | 2 | 2 | 5 | 6 | 4 | 2 | 7 | 7 | 1 | 2 | 2 | 5 | 5 | 4 | 6 | 1 | 1 | 1 | 5 | 4  | 1  | 4 | 1 | 5 | 3 | 4 | 3  | 4  | 4  |   |
| MAT | 4 | 2 | 6 | 5 | 5 | 4 | 2 | 3 | 7 | 7 | 1 | 1 | 3 | 1 | 1 | 1 | 4 | 1 | 1 | 1 | 1 | 1  | 1  | 1 | 5 | 5 | 1 | 5 | 1  | 1  |    |   |
| MAT | 6 | 6 | 1 | 5 | 6 | 5 | 1 | 6 | 7 | 7 | 4 | 4 | 3 | 4 | 5 | 5 | 4 | 1 | 1 | 1 | 6 | EM | 1  | 6 | 1 | 2 | 1 | 6 | EM | EM |    |   |
| MAT | 5 | 5 | 3 | 4 | 6 | 4 | 2 | 4 | 7 | 7 | 1 | 1 | 3 | 1 | 5 | 6 | 2 | 1 | 1 | 1 | 1 | 1  | 1  | 1 | 2 | 7 | 2 | 3 | 2  | 3  |    |   |
| MAT | 6 | 5 | 2 | 3 | 4 | 4 | 4 | 4 | 7 | 7 | 2 | 2 | 3 | 5 | 6 | 4 | 3 | 1 | 1 | 1 | 1 | 1  | 1  | 2 | 1 | 4 | 3 | 4 | 3  | 3  |    |   |
| MAT | 2 | 5 | 5 | 5 | 5 | 6 | 3 | 2 | 7 | 5 | 1 | 2 | 4 | 1 | 6 | 6 | 6 | 1 | 2 | 1 | 1 | 1  | 1  | 1 | 2 | 7 | 5 | 1 | 5  | 1  |    |   |
| MAT | 7 | 4 | 7 | 7 | 7 | 7 | 7 | 4 | 7 | 7 | 3 | 2 | 2 | 1 | 7 | 7 | 5 | 1 | 1 | 1 | 4 | 3  | 2  | 3 | 1 | 5 | 5 | 2 | 5  | 2  |    |   |
| MAT | 6 | 2 | 5 | 6 | 2 | 2 | 6 | 6 | 7 | 7 | 1 | 1 | 1 | 4 | 4 | 1 | 7 | 1 | 3 | 1 | 3 | 3  | DK | 1 | 3 | 5 | 5 | 5 | 5  | 5  |    |   |
| MAT | 4 | 3 | 3 | 5 | 5 | 4 | 4 | 3 | 7 | 7 | 1 | 1 | 3 | 1 | 2 | 4 | 3 | 1 | 1 | 1 | 1 | 1  | 1  | 1 | 2 | 1 | 5 | 3 | 3  | 3  | 3  |   |
| MAT | 1 | 1 | 7 | 7 | 1 | 1 | 7 | 7 | 7 | 7 | 1 | 1 | 3 | 1 | 4 | 6 | 4 | 1 | 1 | 1 | 1 | 1  | 1  | 2 | 1 | 1 | 2 | 4 | 2  | 4  | 2  |   |
| MAT | 7 | 1 | 7 | 7 | 7 | 1 | 7 | 7 | 6 | 6 | 3 | 3 | 2 | 1 | 1 | 6 | 6 | 1 | 2 | 1 | 3 | 3  | 1  | 1 | 1 | 5 | 4 | 2 | 4  | 2  | 2  |   |
| MAT | 7 | 7 | 1 | 4 | 6 | 6 | 2 | 4 | 7 | 7 | 3 | 4 | 4 | 5 | 3 | 4 | 7 | 1 | 1 | 1 | 1 | 1  | 1  | 1 | 1 | 5 | 3 | 3 | 3  | 3  | 3  |   |
| MAT | 7 | 4 | 2 | 4 | 6 | 6 | 2 | 2 | 7 | 7 | 2 | 2 | 3 | 1 | 1 | 2 | 3 | 1 | 1 | 1 | 3 | 4  | 1  | 2 | 1 | 5 | 7 | 2 | 7  | 2  | 2  |   |
| MAT | 7 | 7 | 1 | 2 | 7 | 7 | 1 | 2 | 6 | 6 | 1 | 1 | 3 | 2 | 3 | 5 | 3 | 1 | 1 | 1 | 5 | 1  | 1  | 4 | 1 | 5 | 4 | 4 | 4  | 4  | 4  |   |
| MAT | 4 | 4 | 4 | 4 | 4 | 4 | 4 | 4 | 7 | 7 | 2 | 2 | 1 | 1 | 1 | 1 | 5 | 1 | 1 | 1 | 5 | 1  | 1  | 5 | 1 | 5 | 1 | 5 | 1  | 5  | 1  |   |
| MAT | 2 | 6 | 2 | 6 | 6 | 2 | 6 | 2 | 7 | 7 | 2 | 1 | 2 | 3 | 4 | 5 | 5 | 1 | 2 | 1 | 2 | 2  | 1  | 1 | 2 | 1 | 5 | 4 | 1  | 4  | 1  |   |
| MAT | 6 | 4 | 2 | 5 | 6 | 4 | 2 | 5 | 7 | 7 | 1 | 1 | 3 | 1 | 1 | 4 | 3 | 1 | 2 | 1 | 1 | 1  | 1  | 1 | 1 | 5 | 4 | 4 | 4  | 4  | 4  |   |
| MAT | 6 | 7 | 6 | 1 | 7 | 6 | 2 | 2 | 7 | 5 | 1 | 1 | 4 | 6 | 5 | 7 | 6 | 1 | 1 | 1 | 6 | 1  | 1  | 5 | 1 | 5 | 1 | 4 | 1  | 4  | 4  |   |
| MAT | 7 | 6 | 1 | 1 | 4 | 4 | 4 | 4 | 6 | 6 | 2 | 2 | 3 | 1 | 4 | 6 | 4 | 1 | 2 | 1 | 6 | EM | 1  | 6 | 1 | 5 | 1 | 1 | EM | EM | EM |   |
| MAT | 5 | 5 | 1 | 3 | 5 | 5 | 2 | 4 | 7 | 7 | 2 | 1 | 2 | 1 | 1 | 7 | 3 | 1 | 1 | 1 | 1 | 1  | 1  | 1 | 1 | 5 | 2 | 2 | 2  | 2  | 2  |   |
| MAT | 5 | 7 | 2 | 5 | 5 | 6 | 2 | 4 | 7 | 7 | 1 | 2 | 2 | 4 | 4 | 5 | 2 | 1 | 1 | 1 | 1 | 1  | 1  | 1 | 1 | 5 | 2 | 2 | 2  | 2  | 2  |   |
| MAT | 5 | 6 | 3 | 4 | 6 | 6 | 3 | 2 | 7 | 7 | 1 | 1 | 4 | 1 | 3 | 5 | 4 | 1 | 1 | 1 | 6 | RP | 1  | 2 | 1 | 5 | 4 | 3 | 4  | 3  | 3  |   |
| MAT | 2 | 2 | 5 | 6 | 5 | 5 | 3 | 4 | 7 | 7 | 2 | 2 | 4 | 1 | 4 | 7 | 2 | 1 | 1 | 1 | 1 | 1  | 1  | 1 | 1 | 5 | 4 | 3 | 4  | 3  | 3  |   |
| MAT | 5 | 4 | 3 | 5 | 6 | 6 | 2 | 3 | 7 | 7 | 1 | 1 | 2 | 1 | 4 | 5 | 3 | 1 | 1 | 1 | 1 | 1  | 1  | 1 | 1 | 5 | 6 | 3 | 6  | 3  | 3  |   |
| MAT | 6 | 5 | 1 | 3 | 7 | 6 | 2 | 2 | 7 | 7 | 1 | 1 | 3 | 1 | 3 | 6 | 3 | 1 | 1 | 1 | 5 | 1  | 1  | 4 | 1 | 5 | 3 | 3 | 3  | 3  | 3  |   |
| MAT | 4 | 5 | 2 | 6 | 4 | 5 | 2 | 6 | 7 | 4 | 2 | 2 | 2 | 4 | 6 | 6 | 6 | 1 | 3 | 1 | 1 | 1  | 1  | 1 | 1 | 2 | 5 | 3 | 5  | 3  | 3  |   |
| MAT | 7 | 7 | 1 | 3 | 7 | 7 | 1 | 3 | 7 | 7 | 2 | 6 | 2 | 7 | 6 | 7 | 7 | 1 | 1 | 1 | 1 | 1  | 1  | 1 | 1 | 2 | 7 | 2 | 7  | 2  | 2  |   |
| MAT | 6 | 5 | 1 | 2 | 6 | 5 | 1 | 3 | 7 | 7 | 3 | 1 | 3 | 7 | 7 | 7 | 7 | 1 | 1 | 1 | 6 | AD | 1  | 4 | 1 | 5 | 5 | 2 | 5  | 2  | 2  |   |
| MAT | 4 | 2 | 4 | 6 | 6 | 6 | 2 | 5 | 6 | 7 | 2 | 1 | 3 | 1 | 3 | 7 | 5 | 1 | 1 | 1 | 1 | 1  | 1  | 1 | 1 | 5 | 2 | 2 | 2  | 2  | 2  |   |
| MAT | 7 | 7 | 1 | 6 | 7 | 7 | 2 | 7 | 7 | 7 | 2 | 2 | 5 | 3 | 4 | 4 | 4 | 1 | 2 | 1 | 6 | EM | 1  | 6 | 1 | 5 | 1 | 3 | EM | EM | EM |   |
| MAT | 7 | 5 | 1 | 3 | 6 | 5 | 2 | 3 | 4 | 5 | 3 | 5 | 3 | 3 | 4 | 3 | 5 | 1 | 2 | 2 | 1 | 1  | 1  | 1 | 7 | 1 | 3 | 1 | 3  | 3  | 3  |   |

|     |   |   |   |   |   |   |   |   |   |   |   |   |   |   |   |   |   |   |    |   |   |    |   |   |   |   |   |   |   |   |   |
|-----|---|---|---|---|---|---|---|---|---|---|---|---|---|---|---|---|---|---|----|---|---|----|---|---|---|---|---|---|---|---|---|
| MAT | 6 | 2 | 2 | 6 | 5 | 3 | 3 | 5 | 7 | 7 | 2 | 2 | 2 | 1 | 1 | 1 | 7 | 1 | 1  | 2 | 3 | 2  | 1 | 3 | 4 | 3 | 4 | 3 |   |   |   |
| MAT | 6 | 5 | 1 | 2 | 6 | 6 | 1 | 1 | 7 | 7 | 1 | 1 | 3 | 1 | 2 | 7 | 6 | 1 | 1  | 1 | 5 | 3  | 1 | 4 | 1 | 5 | 5 | 3 | 5 | 3 |   |
| MAT | 2 | 2 | 6 | 6 | 5 | 5 | 3 | 5 | 6 | 6 | 2 | 2 | 2 | 1 | 2 | 4 | 3 | 1 | 1  | 2 | 1 | 1  | 1 | 1 | 5 | 2 | 5 | 2 | 5 |   |   |
| MAT | 5 | 5 | 3 | 6 | 6 | 6 | 2 | 4 | 7 | 7 | 2 | 2 | 2 | 1 | 3 | 7 | 2 | 1 | 1  | 2 | 1 | 1  | 1 | 1 | 5 | 4 | 3 | 4 | 3 |   |   |
| MAT | 4 | 3 | 3 | 4 | 4 | 3 | 3 | 4 | 6 | 7 | 1 | 2 | 3 | 2 | 4 | 7 | 3 | 1 | 1  | 2 | 1 | 1  | 1 | 1 | 5 | 4 | 2 | 4 | 2 |   |   |
| MAT | 7 | 7 | 1 | 1 | 7 | 7 | 1 | 2 | 7 | 7 | 1 | 1 | 3 | 1 | 7 | 7 | 1 | 1 | 1  | 2 | 2 | 2  | 1 | 1 | 5 | 5 | 3 | 5 | 3 |   |   |
| MAT | 6 | 6 | 1 | 2 | 7 | 7 | 1 | 1 | 7 | 7 | 1 | 1 | 3 | 1 | 4 | 7 | 2 | 1 | 1  | 1 | 5 | 3  | 1 | 2 | 1 | 5 | 4 | 3 | 4 | 3 |   |
| MAT | 5 | 5 | 7 | 6 | 6 | 7 | 6 | 6 | 6 | 6 | 4 | 5 | 4 | 5 | 6 | 5 | 7 | 1 | 2  | 1 | 6 |    |   |   |   |   |   |   |   |   |   |
| MAT | 6 | 6 | 3 | 4 | 5 | 6 | 2 | 2 | 6 | 6 | 3 | 3 | 3 | 1 | 3 | 7 | 3 | 1 | 1  | 2 | 2 | 2  | 1 | 1 | 5 | 5 | 1 | 5 | 1 |   |   |
| MAT | 3 | 6 | 2 | 6 | 3 | 4 | 3 | 5 | 7 | 7 | 2 | 2 | 5 | 1 | 1 | 7 | 2 | 1 | 1  | 1 | 4 | DK | 1 | 2 | 2 | 5 | 6 | 2 | 6 | 2 |   |
| MAT | 6 | 7 | 1 | 3 | 6 | 7 | 3 | 5 | 7 | 6 | 1 | 2 | 4 | 5 | 4 | 3 | 4 | 1 | 1  | 1 | 2 |    |   | 2 | 1 | 5 |   |   |   |   |   |
| MAT | 3 | 2 | 5 | 5 | 3 | 5 | 3 | 6 | 7 | 7 | 4 | 5 | 2 | 1 | 3 | 4 | 1 | 1 | 2  | 2 | 1 |    |   | 1 | 1 | 1 | 5 | 2 | 2 | 2 | 2 |
| MAT | 4 | 7 | 4 | 7 | 4 | 7 | 4 | 6 | 7 | 7 | 1 | 1 | 4 | 1 | 4 | 1 | 7 | 1 | 1  | 2 | 1 |    |   | 1 | 1 | 1 | 2 | 6 | 2 | 6 | 2 |
| MES | 4 | 5 | 3 | 2 | 5 | 5 | 2 | 3 | 5 | 7 | 7 | 3 | 5 | 1 | 2 | 2 | 6 | 1 | 1  | 1 | 5 | 2  | 1 | 3 | 1 | 5 | 5 | 4 | 5 | 4 |   |
| MES | 6 | 6 | 2 | 2 | 2 | 2 | 4 | 2 | 2 | 2 | 3 | 2 | 5 | 2 | 3 | 5 | 5 | 1 | 1  | 1 | 5 | 1  | 1 | 6 | 1 | 5 | 2 | 6 | 2 | 6 |   |
| MES | 4 | 4 | 4 | 3 | 4 | 3 | 4 | 3 | 3 | 7 | 4 | 3 | 3 | 3 | 5 | 5 | 3 | 2 | 2  | 1 | 3 |    |   | 1 | 5 | 3 | 3 | 3 | 3 | 3 |   |
| MES | 6 | 6 | 4 | 3 | 3 | 3 | 3 | 3 | 7 | 7 | 7 | 7 | 3 | 3 | 6 | 6 | 2 | 2 | DK | 1 | 5 | 3  | 1 | 4 | 1 | 6 | 2 | 4 | 2 | 4 |   |
| MES | 7 | 7 | 5 | 6 | 6 | 7 | 5 | 5 | 7 | 7 | 7 | 6 | 6 | 1 | 1 | 4 | 1 | 1 | 1  | 1 | 5 | 2  | 1 | 6 | 1 | 2 | 1 | 5 | 1 | 5 |   |
| MES | 4 | 4 | 4 | 6 | 4 | 4 | 3 | 5 | 5 | 7 | 4 | 3 | 1 | 1 | 4 | 6 | 2 | 1 | 2  | 1 | 1 |    |   | 1 | 2 | 1 | 5 | 2 | 6 | 2 | 6 |
| MES | 2 | 2 | 7 | 7 | 2 | 2 | 7 | 6 | 3 | 3 | 7 | 7 | 4 | 6 | 6 | 4 | 7 | 1 | 3  | 1 | 3 | 4  | 2 | 5 | 1 | 5 | 3 | 3 | 3 | 3 |   |
| MES | 3 | 6 | 2 | 2 | 2 | 2 | 4 | 4 | 7 | 6 | 7 | 6 | 4 | 5 | 4 | 4 | 3 | 1 | 2  | 1 | 1 |    |   | 2 | 1 | 1 | 5 | 3 | 1 | 3 | 1 |
| MOL | 6 | 5 | 2 | 4 | 5 | 6 | 2 | 5 | 6 | 7 | 2 | 5 | 6 | 2 | 3 | 6 | 4 | 1 | 2  | 2 | 5 | 2  | 1 | 3 | 1 | 5 | 6 | 1 | 6 | 1 |   |
| MOL | 2 | 2 | 2 | 2 | 6 | 6 | 2 | 2 | 6 | 6 | 7 | 7 | 6 | 1 | 5 | 6 | 5 | 1 | 2  | 2 | 3 | 2  | 1 | 5 | 1 | 5 | 7 | 1 | 7 | 1 |   |
| MOL | 5 | 5 | 4 | 5 | 3 | 3 | 6 | 6 | 6 | 5 | 1 | 1 | 6 | 4 | 2 | 5 | 5 | 1 | 2  | 2 | 1 |    |   | 1 | 1 | 1 | 5 | 5 | 1 | 5 | 1 |
| MOL | 4 | 4 | 4 | 4 | 4 | 4 | 4 | 4 | 7 | 7 | 4 | 4 | 6 | 4 | 4 | 6 | 2 | 1 | 1  | 2 | 3 | DK | 2 | 5 | 1 | 5 | 5 | 2 | 5 | 2 |   |
| MOL | 2 | 2 | 6 | 6 | 4 | 4 | 4 | 4 | 6 | 7 | 2 | 3 | 6 | 1 | 4 | 7 | 5 | 1 | 2  | 2 | 5 | 2  | 1 | 3 | 1 | 5 | 5 | 3 | 5 | 3 |   |
| MOL | 3 | 2 | 4 | 6 | 3 | 2 | 4 | 5 | 7 | 7 | 1 | 1 | 6 | 1 | 1 | 5 | 4 | 1 | 1  | 2 | 2 |    |   | 2 | 2 | 1 | 6 | 5 | 2 | 5 | 2 |
| MOL | 5 | 5 | 3 | 5 | 5 | 5 | 3 | 5 | 6 | 5 | 4 | 3 | 5 | 1 | 1 | 3 | 7 | 1 | 1  | 2 | 2 |    |   | 1 | 1 | 1 | 2 | 6 | 1 | 6 | 1 |
| MOL | 2 | 2 | 4 | 3 | 4 | 4 | 3 | 5 | 5 | 7 | 4 | 6 | 6 | 1 | 5 | 7 | 4 | 1 | 1  | 2 | 4 | 3  | 2 | 3 | 1 | 5 | 4 | 2 | 4 | 2 |   |
| MOL | 4 | 6 | 2 | 2 | 2 | 2 | 5 | 6 | 6 | 6 | 1 | 1 | 5 | 2 | 1 | 1 | 5 | 1 | 1  | 2 | 5 | 5  | 1 | 4 | 1 | 5 | 5 | 1 | 5 | 1 |   |
| MOL | 3 | 3 | 5 | 6 | 5 | 5 | 3 | 3 | 5 | 6 | 3 | 3 | 6 | 3 | 3 | 5 | 5 | 1 | 2  | 2 | 1 |    |   | 2 | 1 | 1 | 5 | 5 | 2 | 5 | 2 |
| MOL | 4 | 3 | 2 | 2 | 5 | 4 | 3 | 3 | 5 | 6 | 1 | 2 | 5 | 1 | 1 | 2 | 7 | 1 | 1  | 2 | 1 |    |   | 2 | 1 | 1 | 5 | 5 | 2 | 5 | 2 |

|     |   |   |   |   |   |   |   |   |   |   |   |   |   |   |   |   |   |   |   |   |   |   |   |   |   |   |   |   |   |   |
|-----|---|---|---|---|---|---|---|---|---|---|---|---|---|---|---|---|---|---|---|---|---|---|---|---|---|---|---|---|---|---|
| MOL | 5 | 4 | 5 | 3 | 6 | 6 | 3 | 3 | 7 | 7 | 2 | 1 | 6 | 2 | 2 | 5 | 6 | 1 | 2 | 2 | 1 | 2 | 2 | 2 | 5 | 3 | 1 | 3 | 1 |   |
| MOL | 5 | 6 | 2 | 6 | 5 | 6 | 4 | 3 | 7 | 7 | 5 | 5 | 3 | 1 | 2 | 2 | 6 | 1 | 1 | 2 | 4 | 4 | 1 | 3 | 1 | 5 | 8 | 2 | 8 | 2 |
| MOL | 5 | 2 | 2 | 6 | 5 | 5 | 5 | 5 | 7 | 6 | 6 | 5 | 7 | 5 | 5 | 6 | 7 | 1 | 2 | 2 | 1 | 1 | 1 | 1 | 2 | 6 | 2 | 6 | 2 |   |
| MOL | 4 | 7 | 1 | 1 | 2 | 7 | 1 | 4 | 7 | 7 | 2 | 2 | 5 | 1 | 4 | 7 | 5 | 1 | 1 | 2 | 2 | 1 | 1 | 1 | 5 | 6 | 2 | 6 | 2 |   |
| MOL | 5 | 5 | 2 | 2 | 5 | 5 | 3 | 3 | 5 | 6 | 2 | 4 | 5 | 1 | 4 | 4 | 4 | 1 | 2 | 2 | 1 | 2 | 1 | 1 | 5 | 5 | 2 | 5 | 2 |   |
| MOL | 5 | 3 | 4 | 6 | 3 | 5 | 3 | 6 | 6 | 6 | 2 | 2 | 5 | 1 | 2 | 6 | 2 | 1 | 2 | 2 | 1 | 2 | 2 | 2 | 5 | 6 | 1 | 6 | 1 |   |
| MOL | 5 | 3 | 6 | 6 | 3 | 2 | 7 | 6 | 6 | 6 | 2 | 2 | 5 | 1 | 1 | 4 | 5 | 1 | 1 | 2 | 1 | 2 | 1 | 1 | 5 | 5 | 1 | 5 | 1 |   |
| MOL | 2 | 1 | 7 | 7 | 2 | 1 | 6 | 6 | 7 | 7 | 4 | 4 | 3 | 1 | 2 | 2 | 6 | 1 | 1 | 2 | 1 | 1 | 1 | 1 | 5 | 5 | 8 | 5 | 8 |   |
| MOL | 5 | 5 | 3 | 4 | 5 | 5 | 3 | 5 | 7 | 7 | 2 | 2 | 5 | 1 | 3 | 5 | 5 | 1 | 1 | 2 | 4 | 1 | 2 | 2 | 1 | 5 | 7 | 2 | 7 | 2 |
| MOL | 1 | 6 | 5 | 1 | 1 | 1 | 2 | 5 | 6 | 7 | 3 | 2 | 5 | 1 | 1 | 4 | 3 | 1 | 1 | 2 | 1 | 2 | 2 | 2 | 5 | 5 | 1 | 5 | 1 |   |
| MOL | 4 | 5 | 4 | 5 | 4 | 5 | 4 | 6 | 6 | 7 | 4 | 4 | 5 | 2 | 4 | 6 | 5 | 1 | 1 | 2 | 5 | 4 | 1 | 3 | 1 | 5 | 7 | 1 | 7 | 1 |
| MOL | 4 | 4 | 3 | 5 | 3 | 4 | 4 | 5 | 6 | 6 | 2 | 3 | 5 | 1 | 3 | 5 | 3 | 1 | 1 | 2 | 1 | 1 | 1 | 1 | 5 | 5 | 2 | 5 | 2 |   |
| MOL | 5 | 4 | 5 | 5 | 3 | 3 | 5 | 6 | 6 | 7 | 1 | 2 | 5 | 1 | 2 | 7 | 7 | 1 | 1 | 2 | 1 | 2 | 1 | 1 | 5 | 5 | 1 | 5 | 1 |   |
| MOL | 5 | 4 | 5 | 7 | 5 | 6 | 3 | 4 | 6 | 7 | 3 | 3 | 6 | 1 | 4 | 6 | 6 | 1 | 1 | 2 | 1 | 1 | 1 | 1 | 3 | 6 | 1 | 6 | 1 |   |
| MOL | 4 | 5 | 4 | 3 | 4 | 4 | 3 | 5 | 6 | 7 | 2 | 4 | 5 | 3 | 3 | 3 | 6 | 1 | 1 | 2 | 1 | 1 | 1 | 1 | 5 | 5 | 2 | 5 | 2 |   |
| MOL | 1 | 1 | 7 | 7 | 3 | 3 | 5 | 5 | 5 | 7 | 1 | 1 | 6 | 1 | 3 | 7 | 1 | 1 | 1 | 2 | 1 | 2 | 1 | 1 | 5 | 5 | 2 | 5 | 2 |   |
| MOL | 1 | 2 | 7 | 7 | 6 | 6 | 4 | 4 | 5 | 5 | 1 | 1 | 4 | 1 | 4 | 4 | 6 | 1 | 1 | 2 | 1 | 1 | 1 | 1 | 2 | 8 | 1 | 8 | 1 |   |
| MOL | 3 | 2 | 6 | 6 | 3 | 6 | 5 | 6 | 4 | 7 | 1 | 2 | 8 | 2 | 3 | 5 | 7 | 1 | 1 | 2 | 1 | 1 | 1 | 1 | 5 | 5 | 1 | 5 | 1 |   |
| MOL | 2 | 3 | 5 | 6 | 3 | 4 | 4 | 6 | 7 | 7 | 2 | 3 | 6 | 1 | 2 | 5 | 6 | 1 | 1 | 2 | 1 | 2 | 1 | 1 | 5 | 6 | 1 | 6 | 1 |   |
| MOL | 1 | 1 | 6 | 2 | 4 | 7 | 5 | 1 | 5 | 7 | 1 | 1 | 7 | 1 | 1 | 1 | 7 | 1 | 1 | 2 | 1 | 1 | 1 | 1 | 2 | 7 | 8 | 7 | 8 |   |
| MOL | 6 | 5 | 2 | 5 | 5 | 5 | 2 | 5 | 6 | 7 | 1 | 1 | 5 | 1 | 4 | 6 | 4 | 1 | 2 | 2 | 1 | 2 | 2 | 1 | 5 | 6 | 1 | 6 | 1 |   |
| MOL | 5 | 5 | 3 | 4 | 7 | 4 | 3 | 3 | 6 | 6 | 2 | 2 | 6 | 1 | 5 | 7 | 5 | 1 | 1 | 2 | 1 | 2 | 1 | 1 | 2 | 5 | 1 | 5 | 1 |   |
| MOL | 6 | 6 | 6 | 5 | 5 | 5 | 6 | 4 | 7 | 7 | 2 | 3 | 4 | 1 | 2 | 7 | 7 | 1 | 1 | 2 | 1 | 1 | 1 | 1 | 5 | 5 | 2 | 5 | 2 |   |
| MOL | 4 | 3 | 2 | 6 | 2 | 3 | 4 | 6 | 7 | 7 | 3 | 3 | 5 | 1 | 4 | 7 | 4 | 1 | 1 | 2 | 1 | 1 | 1 | 1 | 5 | 5 | 1 | 5 | 1 |   |
| MOL | 5 | 3 | 4 | 5 | 5 | 5 | 2 | 5 | 6 | 7 | 2 | 2 | 6 | 1 | 2 | 4 | 5 | 1 | 2 | 2 | 1 | 2 | 2 | 1 | 5 | 6 | 1 | 6 | 1 |   |
| MOL | 6 | 6 | 2 | 2 | 6 | 6 | 3 | 2 | 2 | 2 | 6 | 6 | 5 | 2 | 4 | 5 | 4 | 1 | 1 | 2 | 5 | 2 | 1 | 5 | 5 | 5 | 2 | 5 | 2 |   |
| MOL | 2 | 3 | 5 | 5 | 2 | 3 | 5 | 5 | 6 | 6 | 2 | 3 | 6 | 1 | 1 | 5 | 7 | 1 | 1 | 2 | 1 | 2 | 1 | 1 | 2 | 6 | 1 | 6 | 1 |   |
| MOL | 4 | 4 | 6 | 5 | 3 | 5 | 5 | 5 | 7 | 7 | 2 | 3 | 6 | 1 | 2 | 1 | 7 | 1 | 1 | 2 | 1 | 1 | 1 | 1 | 5 | 5 | 2 | 5 | 2 |   |
| MOL | 2 | 2 | 6 | 5 | 3 | 3 | 6 | 5 | 7 | 7 | 1 | 1 | 6 | 1 | 1 | 2 | 7 | 1 | 1 | 1 | 1 | 1 | 1 | 1 | 5 | 6 | 1 | 6 | 1 |   |
| MOL | 2 | 2 | 6 | 6 | 3 | 4 | 3 | 6 | 7 | 7 | 3 | 5 | 6 | 1 | 1 | 5 | 7 | 1 | 2 | 1 | 1 | 1 | 1 | 2 | 5 | 5 | 1 | 5 | 1 |   |
| MOL | 1 | 6 | 7 | 7 | 1 | 6 | 7 | 7 | 7 | 7 | 3 | 3 | 6 | 6 | 6 | 7 | 6 | 1 | 1 | 1 | 1 | 1 | 1 | 1 | 2 | 7 | 1 | 7 | 1 |   |
| MOL | 4 | 5 | 1 | 3 | 5 | 3 | 1 | 4 | 5 | 5 | 1 | 1 | 6 | 1 | 3 | 3 | 3 | 1 | 2 | 1 | 1 | 1 | 1 | 1 | 5 | 5 | 2 | 5 | 2 |   |



|     |   |   |   |   |   |   |   |   |   |   |   |   |   |   |   |   |   |   |   |   |  |   |    |   |   |   |   |   |   |   |   |   |
|-----|---|---|---|---|---|---|---|---|---|---|---|---|---|---|---|---|---|---|---|---|--|---|----|---|---|---|---|---|---|---|---|---|
| MTC | 6 | 6 | 2 | 5 |   |   |   |   | 5 | 3 | 4 | 4 | 2 | 1 | 5 | 3 | 6 | 1 | 1 | 2 |  | 1 |    | 1 | 2 | 1 | 5 | 5 | 2 | 5 | 2 |   |
| MTC | 5 | 6 | 4 | 4 | 3 | 5 | 5 | 5 | 7 | 6 | 2 | 3 | 1 | 1 | 5 | 3 | 5 | 1 | 1 | 2 |  | 1 |    | 2 | 2 | 1 | 7 | 1 | 7 | 1 | 7 |   |
| MTC | 3 | 2 | 6 | 6 | 6 | 6 | 3 | 4 | 6 | 7 | 4 | 4 | 7 | 1 | 5 | 5 | 6 | 1 | 3 | 2 |  | 3 | DK | 2 | 2 | 1 | 5 | 1 | 6 | 1 | 6 |   |
| MTC | 6 | 7 | 1 | 1 | 5 | 6 | 2 | 2 | 7 | 7 | 6 | 5 | 3 | 1 | 1 | 4 | 6 | 1 | 1 | 1 |  | 5 |    | 3 | 2 | 4 | 1 | 5 | 3 | 3 | 3 | 3 |
| MTC | 5 | 5 | 3 | 3 | 6 | 6 | 2 | 4 | 5 | 5 | 4 | 4 | 4 | 1 | 1 | 4 | 5 | 1 | 1 | 1 |  | 5 |    | 3 | 1 | 4 | 1 | 5 | 3 | 3 | 3 | 3 |
| MTC | 5 | 5 | 2 | 4 | 5 | 5 | 2 | 4 | 6 | 6 | 3 | 3 | 4 | 3 | 3 | 5 | 3 | 2 | 3 | 1 |  | 5 |    |   |   |   |   |   |   |   |   |   |
| MTC | 3 | 4 | 2 | 3 | 4 | 4 | 2 | 3 | 7 | 3 | 7 | 3 | 3 | 1 | 1 | 4 | 4 | 1 | 1 | 3 |  | 5 |    | 1 | 1 | 2 | 1 | 5 | 3 | 4 | 3 | 4 |
| MTC | 2 | 2 | 3 | 5 | 3 | 2 | 3 | 4 | 6 | 6 | 2 | 3 | 3 | 1 | 2 | 2 | 5 | 1 | 1 | 1 |  | 5 |    | 3 | 1 | 4 | 1 | 5 | 6 | 2 | 6 | 2 |
| MTC | 4 | 4 | 5 | 5 | 5 | 4 | 3 | 3 | 6 | 6 | 2 | 2 | 3 | 1 | 1 | 4 | 4 | 1 | 4 | 1 |  | 4 |    | 8 | 1 | 2 | 1 | 5 | 4 | 1 | 4 | 1 |
| MTC | 5 | 5 | 5 | 5 | 6 | 6 | 1 | 4 | 4 | 4 | 7 | 2 | 2 | 2 | 1 | 3 | 2 | 1 | 1 | 2 |  | 1 |    |   | 1 | 1 | 1 | 5 | 4 | 2 | 4 | 2 |
| MTC | 6 | 5 | 2 | 4 | 4 | 3 | 4 | 5 | 6 | 5 | 5 | 6 | 2 | 1 | 2 | 6 | 2 | 1 | 2 | 2 |  | 1 |    |   | 1 | 1 | 1 | 5 | 2 | 8 | 2 | 8 |
| MTC | 5 | 6 | 2 | 6 | 3 | 4 | 5 | 6 | 6 | 5 | 7 | 3 | 3 | 1 | 1 | 5 | 3 | 1 | 1 | 2 |  | 1 |    |   | 1 | 1 | 1 | 5 | 2 | 5 | 2 | 5 |
| MTC | 3 | 4 | 6 | 6 | 5 | 4 | 5 | 5 | 7 | 7 | 7 | 2 | 3 | 1 | 2 | 5 | 5 | 1 | 1 | 1 |  | 3 |    | 1 | 1 | 4 | 1 | 5 | 5 | 4 | 5 | 4 |
| NEU | 5 | 6 | 5 | 2 | 5 | 6 | 5 | 4 | 5 | 5 | 2 | 2 | 3 | 1 | 3 | 5 | 5 | 1 | 1 | 2 |  | 5 |    | 2 | 2 | 5 | 2 | 5 | 5 | 2 | 5 | 2 |
| NEU | 1 | 1 | 6 | 7 | 1 | 2 | 6 | 6 | 7 | 7 | 3 | 2 | 6 | 1 | 1 | 7 | 4 | 1 | 1 | 1 |  | 1 |    |   | 2 | 1 | 1 | 5 | 4 | 2 | 4 | 2 |
| NEU | 5 | 5 | 6 | 6 | 5 | 5 | 6 | 6 | 6 | 6 | 5 | 5 | 6 | 1 | 2 | 5 | 5 | 1 | 1 | 2 |  | 5 |    | 3 | 1 | 5 | 1 | 5 | 5 | 2 | 5 | 2 |
| NEU | 2 | 1 | 5 | 5 | 2 | 1 | 6 | 6 | 7 | 7 | 4 | 4 | 4 | 1 | 2 | 6 | 4 | 1 | 2 | 1 |  | 1 |    |   | 2 | 2 | 1 | 5 | 4 | 2 | 4 | 2 |
| NEU | 2 | 2 | 1 | 4 | 3 | 3 | 3 | 5 | 6 | 6 | 4 | 4 | 7 | 2 | 3 | 4 | 5 | 1 | 1 | 2 |  | 1 |    |   | 2 | 2 | 1 | 6 | 6 | 2 | 6 | 2 |
| NEU | 4 | 3 | 5 | 7 | 4 | 4 | 6 | 6 | 7 | 7 | 3 | 4 | 5 | 1 | 2 | 2 | 6 | 1 | 1 | 2 |  | 1 |    |   | 2 | 2 | 1 | 5 | 5 | 2 | 5 | 2 |
| NEU | 2 | 2 | 5 | 4 | 2 | 3 | 5 | 2 | 7 | 7 | 3 | 3 | 7 | 1 | 3 | 5 | 6 | 1 | 1 | 2 |  | 1 |    |   | 2 | 1 | 1 | 3 | 4 | 2 | 4 | 2 |
| NEU | 6 | 5 | 3 | 3 | 2 | 4 | 3 | 4 | 5 | 5 | 5 | 4 | 6 | 3 | 4 | 3 | 6 | 1 | 1 | 2 |  | 1 |    |   | 1 | 1 | 1 | 5 | 5 | 2 | 5 | 2 |
| NEU | 3 | 3 | 5 | 5 | 4 | 4 | 4 | 4 | 7 | 7 | 4 | 4 | 5 | 1 | 1 | 6 | 5 | 1 | 2 | 2 |  | 1 |    |   | 2 | 1 | 1 | 5 | 5 | 2 | 5 | 2 |
| NEU | 2 | 3 | 3 | 6 | 1 | 2 | 6 | 6 | 7 | 7 | 3 | 5 | 5 | 1 | 2 | 5 | 4 | 1 | 1 | 2 |  | 1 |    |   | 2 | 1 | 1 | 5 | 5 | 1 | 5 | 1 |
| NEU | 7 | 5 | 2 | 6 | 7 | 6 | 2 | 6 | 3 | 6 | 4 | 4 | 8 | 1 | 1 | 7 | 7 | 1 | 1 | 2 |  | 1 |    |   | 2 | 1 | 1 | 5 | 5 | 1 | 5 | 1 |
| NEU | 3 | 5 | 4 | 3 | 2 | 4 | 6 | 5 | 6 | 6 | 3 | 4 | 6 | 1 | 1 | 6 | 6 | 1 | 1 | 2 |  | 1 |    |   | 1 | 1 | 1 | 3 | 4 | 3 | 4 | 3 |
| NEU | 2 | 1 | 6 | 6 | 3 | 2 | 5 | 5 | 5 | 5 | 3 | 6 | 7 | 1 | 2 | 7 | 6 | 1 | 2 | 2 |  | 1 |    |   | 2 | 1 | 1 | 5 | 4 | 1 | 4 | 1 |
| NEU | 5 | 4 | 6 | 5 | 3 | 5 | 6 | 4 | 7 | 7 | 4 | 2 | 6 | 1 | 1 | 4 | 7 | 1 | 1 | 2 |  | 1 |    |   | 2 | 1 | 1 | 5 | 5 | 3 | 5 | 3 |
| NEU | 2 | 4 | 2 | 4 | 5 | 5 | 2 | 3 | 3 | 4 | 2 | 2 | 6 | 2 | 2 | 4 | 7 | 1 | 2 | 2 |  | 1 |    |   | 1 | 1 | 1 | 5 | 3 | 3 | 3 | 3 |
| NEU | 5 | 7 | 1 | 2 | 4 | 5 | 2 | 3 | 6 | 7 | 3 | 4 | 5 | 1 | 2 | 6 | 6 | 1 | 1 | 2 |  | 1 |    |   | 2 | 1 | 1 | 5 | 5 | 1 | 5 | 1 |
| NEU | 6 | 5 | 3 | 3 | 3 | 3 | 5 | 5 | 6 | 7 | 1 | 1 | 5 | 2 | 2 | 1 | 7 | 1 | 1 | 2 |  | 1 |    |   | 1 | 2 | 1 | 5 | 5 | 1 | 5 | 1 |
| NEU | 2 | 4 | 3 | 4 | 3 | 4 | 4 | 5 | 6 | 6 | 3 | 3 | 4 | 2 | 2 | 6 | 5 | 1 | 2 | 1 |  | 5 |    | 3 | 1 | 4 | 1 | 5 | 6 | 2 | 6 | 2 |
| NEU | 2 | 2 | 6 | 6 | 6 | 3 | 5 | 2 | 6 | 7 | 3 | 3 | 5 | 1 | 5 | 6 | 3 | 1 | 1 | 2 |  | 1 |    |   | 2 | 1 | 1 | 5 | 7 | 1 | 7 | 1 |

|     |   |   |   |   |   |   |   |   |   |   |   |   |   |   |   |   |   |   |   |   |   |   |   |   |   |   |   |   |   |   |
|-----|---|---|---|---|---|---|---|---|---|---|---|---|---|---|---|---|---|---|---|---|---|---|---|---|---|---|---|---|---|---|
| NEU | 2 | 2 | 4 | 4 | 4 | 5 | 4 | 6 | 7 | 7 | 4 | 6 | 7 | 3 | 4 | 6 | 5 | 1 | 2 | 1 | 1 | 2 | 1 | 1 | 5 | 5 | 2 | 5 | 2 |   |
| NEU | 5 | 5 | 3 | 4 | 4 | 2 | 3 | 4 | 5 | 7 | 2 | 3 | 7 | 1 | 3 | 6 | 4 | 1 | 1 | 2 | 1 | 2 | 2 | 1 | 5 | 4 | 2 | 4 | 2 |   |
| NEU | 1 | 2 | 7 | 5 | 2 | 2 | 7 | 5 | 5 | 7 | 4 | 3 | 4 | 1 | 2 | 6 | 3 | 1 | 1 | 2 | 1 | 1 | 1 | 7 | 4 | 4 | 4 | 4 |   |   |
| NEU | 2 | 3 | 2 | 7 | 4 | 4 | 4 | 5 | 7 | 7 | 3 | 2 | 6 | 1 | 4 | 5 | 4 | 1 | 1 | 2 | 1 | 2 | 1 | 5 | 6 | 1 | 6 | 1 |   |   |
| NEU | 4 | 4 | 5 | 6 | 4 | 4 | 5 | 5 | 6 | 7 | 3 | 3 | 6 | 1 | 4 | 7 | 4 | 1 | 2 | 1 | 2 | 2 | 1 | 5 | 5 | 2 | 5 | 2 |   |   |
| NEU | 2 | 5 | 4 | 4 | 4 | 4 | 2 | 5 | 7 | 7 | 3 | 3 | 4 | 4 | 5 | 6 | 7 | 1 | 1 | 2 | 1 | 2 | 1 | 5 | 2 | 2 | 2 | 2 |   |   |
| NEU | 3 | 5 | 2 | 3 | 3 | 3 | 5 | 5 | 4 | 6 | 5 | 5 | 6 | 5 | 5 | 6 | 4 | 1 | 1 | 2 | 1 | 1 | 1 | 5 | 7 | 1 | 7 | 1 |   |   |
| NEU | 6 | 4 | 5 | 7 | 5 | 2 | 5 | 5 | 6 | 7 | 5 | 3 | 6 | 1 | 2 | 6 | 6 | 1 | 1 | 2 | 1 | 2 | 1 | 5 | 6 | 2 | 6 | 2 |   |   |
| NEU | 2 | 2 | 6 | 6 | 2 | 3 | 5 | 5 | 6 | 6 | 5 | 3 | 5 | 2 | 5 | 6 | 4 | 1 | 1 | 2 | 1 | 2 | 1 | 5 | 6 | 1 | 6 | 1 |   |   |
| NEU | 6 | 6 | 2 | 2 | 5 | 5 | 3 | 3 | 6 | 7 | 2 | 3 | 5 | 1 | 2 | 6 | 3 | 1 | 1 | 2 | 1 | 1 | 1 | 5 | 6 | 1 | 6 | 1 |   |   |
| NEU | 7 | 7 | 1 | 1 | 5 | 5 | 1 | 1 | 7 | 7 | 2 | 2 | 5 | 1 | 5 | 5 | 3 | 1 | 1 | 2 | 1 | 2 | 1 | 5 | 6 | 1 | 6 | 1 |   |   |
| NEU | 5 | 5 | 5 | 4 | 5 | 5 | 4 | 4 | 7 | 7 | 4 | 4 | 4 | 2 | 3 | 6 | 4 | 1 | 2 | 1 | 1 | 1 | 2 | 5 | 1 | 5 | 1 | 1 |   |   |
| NEU | 5 | 5 | 1 | 2 | 6 | 6 | 1 | 3 | 6 | 6 | 5 | 5 | 6 | 1 | 5 | 7 | 5 | 1 | 1 | 1 | 2 | 2 | 1 | 5 | 5 | 2 | 5 | 2 |   |   |
| NEU | 5 | 3 | 2 | 3 | 4 | 4 | 4 | 5 | 5 | 5 | 5 | 5 | 5 | 3 | 4 | 5 | 5 | 1 | 2 | 1 | 1 | 1 | 5 | 2 | 2 | 2 | 2 | 2 |   |   |
| NEU | 4 | 4 | 4 | 4 | 4 | 3 | 3 | 5 | 7 | 6 | 5 | 3 | 5 | 2 | 3 | 5 | 6 | 1 | 2 | 1 | 3 | 4 | 2 | 3 | 1 | 5 | 2 | 4 | 2 | 4 |
| NEU | 5 | 5 | 2 | 5 | 5 | 5 | 4 | 5 | 7 | 7 | 5 | 6 | 6 | 1 | 5 | 7 | 5 | 1 | 1 | 2 | 1 | 2 | 1 | 5 | 2 | 6 | 2 | 6 |   |   |
| NEU | 7 | 7 | 1 | 2 | 5 | 5 | 4 | 5 | 7 | 5 | 5 | 5 | 4 | 3 | 4 | 5 | 5 | 1 | 1 | 2 | 5 | 1 | 1 | 2 | 1 | 5 | 5 | 2 | 5 | 2 |
| NEU | 3 | 4 | 5 | 5 | 3 | 5 | 6 | 4 | 6 | 6 | 5 | 6 | 5 | 2 | 4 | 3 | 6 | 1 | 1 | 2 | 1 | 1 | 1 | 5 | 2 | 3 | 2 | 3 |   |   |
| NEU | 4 | 6 | 2 | 2 | 5 | 5 | 3 | 3 | 6 | 6 | 3 | 3 | 6 | 1 | 5 | 5 | 3 | 1 | 2 | 2 | 5 | 3 | 2 | 3 | 1 | 5 | 7 | 1 | 7 | 1 |
| NEU | 4 | 4 | 4 | 4 | 6 | 5 | 6 | 6 | 6 | 6 | 3 | 3 | 4 | 1 | 2 | 5 | 5 | 1 | 1 | 2 | 1 | 2 | 1 | 5 | 4 | 2 | 4 | 2 |   |   |
| NEU | 5 | 5 | 3 | 6 | 3 | 2 | 5 | 6 | 5 | 5 | 3 | 2 | 5 | 5 | 2 | 7 | 6 | 1 | 1 | 2 | 1 | 2 | 1 | 2 | 5 | 3 | 5 | 3 |   |   |
| NEU | 3 | 2 | 5 | 5 | 4 | 4 | 4 | 4 | 5 | 6 | 2 | 2 | 5 | 1 | 4 | 7 | 4 | 1 | 1 | 2 | 5 | 4 | 1 | 4 | 1 | 5 | 6 | 1 | 6 | 1 |
| NEU | 5 | 6 | 3 | 6 | 4 | 4 | 3 | 6 | 6 | 6 | 3 | 3 | 5 | 1 | 2 | 2 | 4 | 1 | 1 | 2 | 5 | 1 | 1 | 3 | 1 | 5 | 6 | 1 | 6 | 1 |
| PHI | 4 | 5 | 1 | 3 | 6 | 6 | 1 | 2 | 7 | 5 | 5 | 4 | 4 | 1 | 4 | 6 | 2 | 1 | 1 | 2 | 5 | 1 | 2 | 4 | 1 | 5 | 3 | 3 | 3 | 3 |
| PHI | 5 | 5 | 4 | 4 | 5 | 5 | 3 | 4 | 7 | 7 | 6 | 6 | 3 | 1 | 6 | 7 | 3 | 1 | 2 | 2 | 1 | 2 | 2 | 1 | 5 | 1 | 4 | 1 | 4 |   |
| PHI | 6 | 6 | 1 | 6 | 6 | 6 | 1 | 6 | 7 | 7 | 4 | 2 | 5 | 1 | 2 | 5 | 4 | 1 | 3 | 2 | 5 | 1 | 1 | 4 | 1 | 5 | 5 | 2 | 5 | 2 |
| PHI | 3 | 7 | 1 | 2 | 4 | 7 | 1 | 3 | 7 | 7 | 3 | 2 | 3 | 1 | 5 | 7 | 1 | 1 | 2 | 2 | 1 | 2 | 1 | 5 | 5 | 2 | 5 | 2 |   |   |
| PHI | 5 | 5 | 6 | 6 | 6 | 6 | 5 | 5 | 7 | 7 | 2 | 7 | 2 | 3 | 6 | 7 | 3 | 1 | 1 | 2 | 1 | 2 | 1 | 5 | 4 | 2 | 4 | 2 |   |   |
| PHI | 6 | 6 | 1 | 2 |   |   |   |   | 6 | 6 | 4 | 2 | 2 | 1 | 2 | 5 | 4 | 1 | 1 | 2 | 1 | 2 | 1 | 5 | 3 | 5 | 3 | 5 |   |   |
| PHI | 6 | 5 | 2 | 3 | 7 | 6 | 2 | 2 | 7 | 6 | 3 | 4 | 4 | 5 | 6 | 3 | 3 | 1 | 1 | 2 | 1 | 2 | 1 | 5 | 3 | 1 | 3 | 1 |   |   |
| PHI | 7 | 6 | 1 | 4 | 7 | 7 | 2 | 2 | 5 | 7 | 4 | 2 | 5 | 1 | 4 | 6 | 5 | 1 | 1 | 2 | 5 | 1 | 1 | 4 | 1 | 6 | 2 | 5 | 2 | 5 |
| PHI | 6 | 5 | 1 | 3 | 5 | 4 | 1 | 3 | 7 | 7 | 5 | 3 | 3 | 1 | 1 | 4 | 5 | 1 | 1 | 2 | 5 | 1 | 1 | 3 | 1 | 5 | 4 | 2 | 4 | 2 |



|     |   |   |   |   |   |   |   |   |   |   |   |   |   |   |   |   |   |   |   |   |   |   |   |   |   |   |   |   |   |   |   |   |   |
|-----|---|---|---|---|---|---|---|---|---|---|---|---|---|---|---|---|---|---|---|---|---|---|---|---|---|---|---|---|---|---|---|---|---|
| PHI | 6 | 5 | 1 | 3 | 5 | 6 | 1 | 4 | 7 | 7 | 3 | 1 | 3 | 1 | 3 | 7 | 5 | 1 | 1 | 2 | 1 | 2 | 1 | 1 | 5 | 1 | 3 | 1 | 3 |   |   |   |   |
| PHI | 5 | 5 | 4 | 4 | 6 | 6 | 4 | 2 | 6 | 7 | 6 | 4 | 2 | 2 | 3 | 5 | 3 | 1 | 1 | 2 | 1 | 1 | 1 | 1 | 5 | 3 | 2 | 3 | 2 |   |   |   |   |
| PHI | 4 | 5 | 1 | 2 | 4 | 5 | 1 | 3 | 7 | 7 | 4 | 3 | 3 | 1 | 3 | 7 | 1 | 1 | 3 | 2 | 4 | 1 | 2 | 2 | 2 | 5 | 2 | 3 | 2 | 3 |   |   |   |
| PHI | 5 | 5 | 1 | 3 | 5 | 5 | 1 | 4 | 6 | 7 | 5 | 5 | 4 | 1 | 1 | 2 | 7 | 1 | 1 | 2 | 1 | 1 | 1 | 1 | 5 | 6 | 1 | 6 | 1 |   |   |   |   |
| PHI | 4 | 5 | 3 | 3 | 4 | 5 | 2 | 3 | 6 | 6 | 4 | 3 | 3 | 1 | 1 | 5 | 4 | 1 | 1 | 2 | 1 | 1 | 1 | 1 | 5 | 2 | 2 | 2 | 2 |   |   |   |   |
| PHI | 6 | 6 | 1 | 4 | 6 | 6 | 1 | 4 | 7 | 7 | 3 | 3 | 3 | 1 | 2 | 5 | 3 | 1 | 1 | 2 | 1 | 1 | 1 | 1 | 5 | 2 | 3 | 2 | 3 |   |   |   |   |
| PHI | 7 | 7 | 1 | 5 | 6 | 6 | 2 | 2 | 7 | 7 | 5 | 3 | 3 | 1 | 2 | 7 | 2 | 1 | 1 | 2 | 4 | 1 | 1 | 2 | 2 | 5 | 3 | 3 | 3 | 3 |   |   |   |
| PHI | 6 | 6 | 2 | 2 | 2 | 6 | 2 | 6 | 7 | 7 | 7 | 2 | 2 | 2 | 2 | 6 | 2 | 1 | 1 | 2 | 1 | 1 | 2 | 1 | 2 | 1 | 5 | 1 | 5 |   |   |   |   |
| PHI | 6 | 7 | 1 | 4 | 7 | 7 | 1 | 2 | 7 | 7 | 1 | 2 | 3 | 5 | 3 | 4 | 3 | 1 | 1 | 2 | 1 | 1 | 2 | 1 | 2 | 1 | 5 | 1 | 5 |   |   |   |   |
| PHI | 6 | 6 | 2 | 4 | 6 | 6 | 1 | 5 | 7 | 7 | 4 | 2 | 3 | 4 | 5 | 5 | 3 | 1 | 1 | 2 | 1 | 1 | 2 | 1 | 1 | 1 | 5 | 3 | 1 | 3 | 1 |   |   |
| PHI | 6 | 6 | 5 | 4 | 5 | 5 | 5 | 5 | 7 | 7 | 4 | 4 | 4 | 1 | 1 | 5 | 7 | 1 | 1 | 2 | 1 | 1 | 2 | 1 | 1 | 2 | 7 | 4 | 1 | 4 | 1 |   |   |
| PHI | 4 | 6 | 3 | 3 | 5 | 6 | 5 | 4 | 7 | 5 | 2 | 2 | 3 | 7 | 5 | 6 | 3 | 1 | 1 | 2 | 1 | 1 | 2 | 1 | 1 | 1 | 5 | 2 | 4 | 2 | 4 |   |   |
| PHI | 6 | 6 | 1 | 3 | 7 | 6 | 2 | 3 | 7 | 7 | 5 | 2 | 2 | 1 | 1 | 4 | 6 | 1 | 1 | 2 | 1 | 1 | 2 | 1 | 2 | 1 | 1 | 1 | 5 | 1 | 4 | 1 | 4 |
| PHI | 5 | 5 | 1 | 6 | 5 | 5 | 2 | 3 | 7 | 7 | 1 | 1 | 2 | 1 | 5 | 7 | 1 | 1 | 1 | 2 | 2 | 1 | 2 | 1 | 2 | 1 | 5 | 3 | 3 | 3 | 3 |   |   |
| PHI | 4 | 5 | 1 | 5 | 4 | 4 | 2 | 6 | 7 | 7 | 5 | 3 | 3 | 1 | 4 | 4 | 4 | 1 | 1 | 2 | 1 | 1 | 2 | 1 | 1 | 1 | 5 | 3 | 2 | 3 | 2 |   |   |
| PHI | 6 | 6 | 2 | 2 | 6 | 5 | 3 | 3 | 6 | 7 | 2 | 1 | 3 | 2 | 3 | 6 | 4 | 1 | 1 | 2 | 1 | 1 | 2 | 1 | 1 | 1 | 5 | 1 | 2 | 1 | 2 |   |   |
| PHI | 7 | 5 | 1 | 4 | 6 | 6 | 1 | 4 | 7 | 7 | 7 | 2 | 3 | 1 | 6 | 7 | 1 | 1 | 1 | 2 | 4 | 2 | 2 | 3 | 1 | 5 | 1 | 4 | 1 | 4 | 4 |   |   |
| PHI | 5 | 4 | 2 | 2 | 6 | 6 | 2 | 3 | 7 | 6 | 2 | 2 | 3 | 1 | 5 | 6 | 2 | 1 | 1 | 2 | 1 | 1 | 2 | 1 | 1 | 1 | 5 | 2 | 4 | 2 | 4 | 4 |   |
| PHI | 5 | 6 | 2 | 5 | 7 | 7 | 1 | 1 | 7 | 7 | 5 | 6 | 3 | 1 | 4 | 7 | 3 | 1 | 3 | 2 | 1 | 1 | 2 | 1 | 1 | 1 | 5 | 2 | 4 | 2 | 4 | 4 |   |
| PHI | 6 | 6 | 1 | 2 | 6 | 6 | 1 | 2 | 6 | 7 | 2 | 2 | 3 | 4 | 4 | 4 | 5 | 1 | 1 | 2 | 5 | 1 | 1 | 5 | 1 | 5 | 3 | 4 | 3 | 4 | 4 |   |   |
| PHI | 6 | 7 | 1 | 4 | 6 | 6 | 1 | 4 | 7 | 7 | 4 | 7 | 4 | 3 | 6 | 2 | 2 | 1 | 1 | 2 | 1 | 1 | 2 | 1 | 2 | 2 | 2 | 2 | 2 | 2 | 2 |   |   |
| PHI | 6 | 7 | 1 | 3 | 5 | 6 | 2 | 3 | 7 | 6 | 5 | 5 | 3 | 4 | 2 | 4 | 4 | 1 | 1 | 1 | 5 | 1 | 1 | 1 | 5 | 1 | 5 | 1 | 5 | 1 | 5 |   |   |
| PHI | 5 | 5 | 3 | 3 | 5 | 5 | 2 | 3 | 6 | 5 | 2 | 2 | 3 | 3 | 2 | 3 | 6 | 1 | 1 | 1 | 1 | 1 | 1 | 1 | 1 | 5 | 7 | 1 | 7 | 1 | 1 |   |   |
| PHI | 6 | 7 | 1 | 2 | 1 | 1 | 7 | 7 | 7 | 7 | 5 | 5 | 3 | 1 | 5 | 5 | 3 | 1 | 1 | 1 | 1 | 1 | 1 | 1 | 1 | 5 | 1 | 5 | 1 | 5 | 1 | 5 |   |
| PHI | 3 | 5 | 3 | 5 | 6 | 6 | 2 | 2 | 7 | 7 | 5 | 6 | 3 | 1 | 5 | 6 | 2 | 1 | 1 | 1 | 5 | 1 | 2 | 4 | 1 | 5 | 3 | 4 | 3 | 4 | 4 |   |   |
| PHI | 5 | 5 | 3 | 3 | 5 | 5 | 3 | 3 | 7 | 7 | 4 | 2 | 4 | 1 | 4 | 6 | 2 | 1 | 1 | 1 | 5 | 1 | 1 | 3 | 1 | 6 | 1 | 5 | 1 | 5 | 1 | 5 |   |
| PHI | 5 | 5 | 3 | 5 | 6 | 6 | 2 | 3 | 6 | 7 | 3 | 3 | 3 | 2 | 6 | 7 | 2 | 1 | 1 | 1 | 5 | 1 | 2 | 3 | 1 | 5 | 3 | 3 | 3 | 3 | 3 |   |   |
| PHI | 5 | 5 | 1 | 5 | 6 | 6 | 1 | 2 | 6 | 7 | 2 | 3 | 3 | 1 | 5 | 7 | 1 | 1 | 1 | 1 | 1 | 1 | 1 | 1 | 1 | 2 | 2 | 3 | 2 | 3 | 3 |   |   |
| PHI | 6 | 6 | 1 | 2 | 6 | 6 | 2 | 2 | 5 | 5 | 2 | 2 | 4 | 1 | 1 | 4 | 3 | 1 | 1 | 2 | 1 | 1 | 2 | 1 | 2 | 2 | 5 | 2 | 5 | 2 | 5 |   |   |
| PHI | 2 | 4 | 2 | 3 | 4 | 5 | 1 | 2 | 7 | 7 | 6 | 5 | 3 | 1 | 3 | 7 | 2 | 1 | 1 | 1 | 5 | 3 | 1 | 2 | 1 | 5 | 3 | 3 | 3 | 3 | 3 |   |   |
| PHI | 2 | 6 | 2 | 6 | 7 | 6 | 2 | 2 | 7 | 7 | 4 | 3 | 3 | 2 | 3 | 5 | 4 | 1 | 1 | 1 | 4 | 2 | 1 | 3 | 1 | 2 | 2 | 8 | 2 | 8 | 8 |   |   |
| PHI | 4 | 5 | 2 | 4 | 4 | 4 | 2 | 4 | 7 | 7 | 2 | 3 | 2 | 1 | 3 | 6 | 3 | 1 | 1 | 1 | 1 | 1 | 1 | 1 | 5 | 1 | 5 | 1 | 5 | 1 | 5 |   |   |

|     |   |   |   |   |   |   |   |   |   |   |   |   |   |   |   |   |   |   |    |   |   |    |   |   |   |   |   |   |    |    |
|-----|---|---|---|---|---|---|---|---|---|---|---|---|---|---|---|---|---|---|----|---|---|----|---|---|---|---|---|---|----|----|
| PHI | 5 | 4 | 7 | 6 | 3 | 5 | 3 | 4 | 5 | 4 | 7 | 3 | 4 | 6 | 4 | 4 | 2 | 1 | 1  | 2 | 1 | 1  | 1 | 1 | 5 | 4 | 2 | 4 | 2  |    |
| PHI | 3 | 5 | 3 | 6 | 3 | 5 | 4 | 6 | 7 | 7 | 4 | 2 | 2 | 1 | 3 | 6 | 3 | 1 | 1  | 1 | 1 | 1  | 1 | 1 | 5 | 3 | 1 | 3 | 1  |    |
| PHI | 6 | 7 | 1 | 3 | 6 | 6 | 1 | 2 | 7 | 7 | 2 | 1 | 3 | 2 | 5 | 5 | 3 | 1 | 1  | 1 | 1 | 1  | 1 | 5 | 3 | 4 | 3 | 4 |    |    |
| PHI | 2 | 3 | 5 | 6 | 3 | 3 | 4 | 5 | 7 | 6 | 5 | 4 | 4 | 1 | 2 | 3 | 3 | 1 | 1  | 1 | 3 | 1  | 1 | 2 | 1 | 5 | 1 | 5 | 1  | 5  |
| PHI | 5 | 5 | 3 | 4 | 5 | 4 | 3 | 4 | 6 | 7 | 5 | 5 | 3 | 2 | 4 | 5 | 4 | 1 | 1  | 1 | 1 | 1  | 2 | 1 | 5 | 2 | 3 | 2 | 3  |    |
| PHI | 4 | 4 | 3 | 5 | 7 | 5 | 4 | 5 | 6 | 6 | 6 | 4 | 2 | 2 | 5 | 7 | 1 | 1 | 2  | 2 | 1 | 1  | 2 | 1 | 5 | 2 | 3 | 2 | 3  |    |
| PHI | 6 | 6 | 2 | 3 | 4 | 4 | 4 | 4 | 7 | 7 | 5 | 4 | 3 | 2 | 1 | 2 | 7 | 1 | 2  | 2 | 1 | 1  | 2 | 1 | 5 | 2 | 4 | 2 | 4  |    |
| PHI | 2 | 4 | 1 | 6 | 3 | 5 | 1 | 4 | 7 | 7 | 3 | 3 | 3 | 1 | 1 | 6 | 4 | 2 | 4  | 1 | 4 | 1  | 2 | 2 | 1 | 5 | 4 | 2 | 4  | 2  |
| PHI | 3 | 4 | 3 | 3 | 4 | 4 | 4 | 4 | 7 | 5 | 6 | 4 | 2 | 1 | 4 | 7 | 2 | 1 | 2  | 2 | 1 | 1  | 2 | 2 | 5 | 2 | 3 | 2 | 3  |    |
| PHI | 2 | 2 | 6 | 5 | 7 | 7 | 1 | 1 | 5 | 7 | 5 | 4 | 3 | 1 | 3 | 7 | 3 | 1 | 1  | 2 | 4 | 1  | 2 | 2 | 1 | 5 | 2 | 3 | 2  | 3  |
| PHI | 6 | 6 | 1 | 6 | 6 | 6 | 2 | 7 | 7 | 7 | 5 | 2 | 3 | 1 | 3 | 7 | 2 | 1 | 2  | 2 | 1 | 1  | 2 | 1 | 3 | 2 | 3 | 2 | 3  |    |
| PHI | 5 | 5 | 2 | 2 | 6 | 7 | 1 | 7 | 7 | 7 | 3 | 1 | 2 | 1 | 2 | 7 | 2 | 1 | 2  | 2 | 5 | 2  | 1 | 3 | 1 | 5 | 4 | 3 | 4  | 3  |
| PHI | 5 | 5 | 4 | 6 | 4 | 5 | 4 | 3 | 7 | 7 | 5 | 3 | 4 | 1 | 3 | 7 | 2 | 1 | 1  | 2 | 1 | 1  | 2 | 1 | 5 | 2 | 4 | 2 | 4  |    |
| PHI | 7 | 7 | 1 | 1 | 7 | 7 | 1 | 1 | 7 | 7 | 4 | 3 | 2 | 4 | 4 | 4 | 4 | 1 | 2  | 2 | 3 | DK | 1 | 2 | 1 | 5 | 5 | 2 | 5  | 2  |
| PHI | 2 | 4 | 2 | 6 | 4 | 4 | 2 | 4 | 6 | 7 | 4 | 4 | 3 | 1 | 4 | 5 | 3 | 1 | 1  | 3 | 1 | 1  | 3 | 1 | 5 | 5 | 2 | 5 | 2  |    |
| PHI | 6 | 6 | 2 | 6 | 6 | 6 | 2 | 6 | 7 | 7 | 5 | 3 | 4 | 1 | 7 | 7 | 1 | 1 | 2  | 2 | 1 | 1  | 2 | 2 | 5 | 8 | 1 | 8 | 1  |    |
| PHI | 2 | 2 | 3 | 7 | 4 | 6 | 4 | 6 | 7 | 7 | 4 | 7 | 2 | 1 | 6 | 7 | 1 | 1 | 2  | 2 | 3 | DK | 1 | 2 | 1 | 5 | 2 | 4 | 2  | 4  |
| PHY | 3 | 4 | 3 | 3 | 3 | 4 | 2 | 3 | 5 | 4 | 3 | 4 | 1 | 2 | 1 | 2 | 3 | 1 | 1  | 2 | 2 | 1  | 2 | 1 | 5 | 3 | 2 | 3 | 2  |    |
| PHY | 6 | 6 | 1 | 2 | 6 | 6 | 1 | 7 | 6 | 7 | 1 | 1 | 2 | 4 | 6 | 7 | 1 | 1 | 4  | 2 | 6 | EM | 1 | 6 | 1 | 5 | 1 | 3 | EM | EM |
| PHY | 5 | 5 | 2 | 4 | 6 | 6 | 1 | 3 | 7 | 7 | 2 | 3 | 2 | 1 | 3 | 6 | 2 | 1 | 1  | 1 | 4 | 2  | 2 | 2 | 1 | 5 | 5 | 3 | 5  | 3  |
| PHY | 2 | 4 | 7 | 7 | 1 | 4 | 6 | 7 | 7 | 7 | 1 | 1 | 2 | 4 | 4 | 4 | 4 | 1 | 2  | 2 | 4 | DK | 1 | 2 | 1 | 5 | 8 | 2 | 8  | 2  |
| PHY | 3 | 5 | 2 | 6 | 5 | 6 | 2 | 5 | 7 | 7 | 3 | 4 | 4 | 1 | 5 | 7 | 4 | 1 | 2  | 2 | 2 | 1  | 2 | 1 | 5 | 5 | 2 | 5 | 2  |    |
| PHY | 7 | 7 | 2 | 3 | 6 | 6 | 2 | 3 | 6 | 7 | 1 | 1 | 3 | 5 | 6 | 7 | 6 | 1 | 2  | 2 | 5 | 6  | 1 | 4 | 1 | 2 | 2 | 5 | 2  | 5  |
| PHY | 4 | 6 | 1 | 3 | 4 | 7 | 1 | 3 | 7 | 7 | 5 | 3 | 2 | 2 | 4 | 5 | 5 | 1 | 2  | 2 | 5 | 4  | 2 | 4 | 1 | 5 | 4 | 2 | 4  | 2  |
| PHY | 1 | 2 | 2 | 7 | 1 | 2 | 2 | 7 | 7 | 7 | 2 | 3 | 3 | 1 | 2 | 1 | 7 | 1 | 2  | 2 | 1 | 1  | 2 | 2 | 1 | 5 | 2 | 5 | 2  |    |
| PHY | 6 | 6 | 2 | 4 | 6 | 6 | 2 | 4 | 7 | 6 | 1 | 2 | 2 | 5 | 5 | 5 | 3 | 1 | 1  | 2 | 5 | 2  | 1 | 4 | 1 | 5 | 5 | 2 | 5  | 2  |
| PHY | 6 | 5 | 5 | 5 | 6 | 6 | 3 | 3 | 6 | 6 | 3 | 3 | 4 | 3 | 2 | 5 | 4 | 1 | 1  | 2 | 6 | EM | 1 | 6 | 1 | 5 | 5 | 2 | EM | EM |
| PHY | 3 | 5 | 3 | 4 | 4 | 4 | 4 | 4 | 6 | 6 | 2 | 2 | 2 | 3 | 3 | 7 | 1 | 1 | 2  | 2 | 1 | 1  | 2 | 2 | 1 | 5 | 5 | 2 | 5  | 2  |
| PHY | 6 | 6 | 2 | 2 | 6 | 4 | 4 | 3 | 7 | 7 | 1 | 1 | 3 | 1 | 4 | 7 | 7 | 1 | 2  | 2 | 1 | 1  | 2 | 1 | 5 | 1 | 4 | 1 | 4  |    |
| PHY | 5 | 6 | 7 | 2 | 5 | 2 | 6 | 7 | 6 | 5 | 5 | 1 | 3 | 5 | 5 | 5 | 6 | 1 | 2  | 2 | 2 | 1  | 1 | 1 | 2 | 7 | 3 | 7 | 3  |    |
| PHY | 6 | 5 | 5 | 4 | 5 | 5 | 5 | 5 | 6 | 6 | 2 | 2 | 4 | 2 | 2 | 2 | 4 | 1 | DK | 2 | 2 | 1  | 1 | 1 | 2 | 6 | 1 | 6 | 1  |    |
| PHY | 4 | 5 | 3 | 4 | 6 | 6 | 1 | 2 | 7 | 7 | 2 | 3 | 2 | 1 | 4 | 7 | 2 | 1 | 1  | 2 | 2 | 1  | 2 | 1 | 5 | 8 | 3 | 8 | 3  |    |

|     |   |   |   |   |   |   |   |   |   |   |   |   |   |   |   |   |   |   |    |   |   |    |   |   |   |   |   |   |    |    |
|-----|---|---|---|---|---|---|---|---|---|---|---|---|---|---|---|---|---|---|----|---|---|----|---|---|---|---|---|---|----|----|
| PHY | 4 | 4 | 4 | 4 | 6 | 6 | 3 | 3 | 7 | 7 | 2 | 2 | 3 | 1 | 3 | 6 | 2 | 1 | 2  | 2 | 5 | 3  | 1 | 3 | 5 | 6 | 1 | 6 | 1  |    |
| PHY | 7 | 7 | 1 | 1 | 7 | 7 | 1 | 1 | 7 | 7 | 1 | 1 | 1 | 1 | 1 | 7 | 5 | 1 | 1  | 2 | 5 | 3  | 1 | 4 | 1 | 2 | 5 | 3 | 5  | 3  |
| PHY | 7 | 7 | 7 | 7 | 7 | 7 | 7 | 7 | 5 | 6 | 5 | 4 | 2 | 1 | 5 | 2 | 2 | 1 | 1  | 2 | 1 |    | 2 | 1 | 1 | 2 | 6 | 1 | 6  | 1  |
| PHY | 5 | 5 | 3 | 3 | 6 | 3 | 6 | 3 | 6 | 6 | 2 | 2 | 3 | 1 | 3 | 5 | 3 | 1 | 2  | 2 | 3 | 9  | 1 | 5 | 1 | 5 | 5 | 1 | 5  | 1  |
| PHY | 2 | 3 | 1 | 5 | 2 | 2 | 1 | 3 | 7 | 6 | 1 | 1 | 2 | 4 | 6 | 4 | 3 | 1 | 3  | 2 | 5 | 6  | 1 | 4 | 1 | 5 | 5 | 1 | 5  | 1  |
| PHY | 4 | 5 | 3 | 6 | 5 | 5 | 3 | 3 | 6 | 6 | 4 | 3 | 4 | 1 | 6 | 6 | 3 | 1 | 2  | 2 | 1 |    | 1 | 1 | 1 | 5 | 5 | 2 | 5  | 2  |
| PHY | 6 | 5 | 5 | 4 | 7 | 7 | 1 | 3 | 6 | 6 | 2 | 2 | 2 | 1 | 2 | 2 | 4 | 1 | 1  | 2 | 1 |    | 1 | 1 | 1 | 5 | 5 | 1 | 5  | 1  |
| PHY | 5 | 5 | 2 | 2 | 6 | 6 | 1 | 2 | 7 | 7 | 1 | 1 | 3 | 1 | 3 | 7 | 5 | 1 | 1  | 1 | 5 | 3  | 1 | 4 | 1 | 5 | 4 | 3 | 4  | 3  |
| PHY | 3 | 5 | 3 | 3 | 7 | 7 | 1 | 1 | 7 | 7 | 2 | 2 | 2 | 1 | 4 | 7 | 2 | 1 | 1  | 1 | 5 | 3  | 2 | 3 | 1 | 5 | 6 | 2 | 6  | 2  |
| PHY | 6 | 5 | 2 | 5 | 5 | 6 | 7 | 4 | 7 | 7 | 1 | 1 | 2 | 2 | 5 | 7 | 2 | 1 | 1  | 1 | 1 |    | 2 | 1 | 1 | 5 | 7 | 1 | 7  | 1  |
| PHY | 6 | 4 | 4 | 4 | 6 | 6 | 2 | 3 | 7 | 7 | 1 | 1 | 3 | 1 | 3 | 2 | 6 | 1 | 1  | 1 | 1 |    | 2 | 1 | 2 | 5 | 4 | 4 | 4  | 4  |
| PHY | 5 | 3 | 5 | 4 | 5 | 5 | 3 | 3 | 6 | 6 | 2 | 4 | 4 | 1 | 3 | 6 | 3 | 1 | DK | 1 | 2 |    | 2 | 1 | 1 | 5 | 5 | 1 | 5  | 1  |
| PHY | 5 | 5 | 3 | 3 | 5 | 6 | 2 | 3 | 6 | 6 | 2 | 3 | 3 | 2 | 4 | 7 | 4 | 1 | 1  | 1 | 1 |    | 1 | 1 | 1 | 5 | 2 | 6 | 2  | 6  |
| PHY | 3 | 3 | 5 | 6 | 3 | 6 | 5 | 5 | 7 | 7 | 1 | 2 | 3 | 1 | 4 | 6 | 2 | 1 | 1  | 1 | 1 |    | 1 | 1 | 1 | 5 | 4 | 1 | 4  | 1  |
| PHY | 2 | 2 | 6 | 6 | 2 | 2 | 6 | 6 | 7 | 7 | 1 | 1 | 2 | 1 | 1 | 4 | 7 | 1 | 2  | 1 | 4 | 3  | 1 | 2 | 1 | 5 | 8 | 2 | 8  | 2  |
| PHY | 5 | 5 | 4 | 3 | 5 | 4 | 4 | 6 | 7 | 6 | 3 | 3 | 3 | 5 | 5 | 5 | 4 | 1 | 2  | 1 | 6 | EM | 1 | 6 | 1 | 5 | 4 | 1 | EM | EM |
| PHY | 6 | 6 | 2 | 2 | 5 | 4 | 4 | 5 | 6 | 7 | 1 | 1 | 2 | 2 | 5 | 6 | 2 | 1 | 1  | 1 | 1 |    | 1 | 1 | 1 | 5 | 3 | 8 | 3  | 8  |
| PHY | 3 | 3 | 6 | 6 | 5 | 4 | 5 | 5 | 7 | 7 | 2 | 2 | 3 | 2 | 4 | 5 | 4 | 1 | 1  | 1 | 1 |    | 1 | 1 | 1 | 5 | 5 | 2 | 5  | 2  |
| PHY | 3 | 3 | 5 | 3 | 2 | 6 | 6 | 3 | 6 | 7 | 2 | 2 | 3 | 4 | 5 | 3 | 6 | 1 | 1  | 1 | 1 |    | 1 | 1 | 1 | 5 | 3 | 3 | 3  | 3  |
| PHY | 2 | 2 | 1 | 6 | 6 | 6 | 1 | 2 | 7 | 7 | 1 | 4 | 2 | 1 | 2 | 4 | 6 | 1 | 1  | 1 | 1 |    | 1 | 1 | 1 | 5 | 5 | 2 | 5  | 2  |
| PHY | 3 | 3 | 5 | 6 | 6 | 6 | 2 | 2 | 7 | 7 | 5 | 5 | 2 | 1 | 5 | 6 | 2 | 1 | 1  | 1 | 1 |    | 1 | 1 | 1 | 5 | 5 | 1 | 5  | 1  |
| PHY | 1 | 1 | 7 | 7 | 2 | 4 | 6 | 6 | 7 | 7 | 1 | 3 | 3 | 1 | 1 | 6 | 2 | 1 | 1  | 1 | 1 |    | 1 | 1 | 1 | 6 | 5 | 4 | 5  | 4  |
| PHY | 2 | 1 | 5 | 6 | 1 | 7 | 1 | 1 | 7 | 7 | 2 | 2 | 1 | 1 | 7 | 7 | 2 | 1 | 1  | 1 | 1 |    | 1 | 1 | 1 | 3 | 2 | 7 | 2  | 7  |
| PHY | 1 | 1 | 6 | 6 | 2 | 1 | 6 | 6 | 6 | 5 | 1 | 1 | 4 | 1 | 3 | 5 | 3 | 1 | DK | 1 | 1 |    | 1 | 1 | 1 | 5 | 3 | 4 | 3  | 4  |
| PHY | 4 | 5 | 2 | 5 | 6 | 6 | 2 | 5 | 6 | 7 | 2 | 2 | 3 | 2 | 4 | 6 | 4 | 1 | 2  | 1 | 1 |    | 1 | 1 | 1 | 5 | 4 | 2 | 4  | 2  |
| PHY | 5 | 5 | 5 | 3 | 4 | 4 | 4 | 4 | 4 | 4 | 4 | 4 | 4 | 4 | 4 | 4 | 4 | 2 | 3  | 1 | 1 |    | 1 | 1 | 1 | 2 | 7 | 2 | 7  | 2  |
| PHY | 4 | 4 | 2 | 3 | 4 | 4 | 2 | 3 | 7 | 7 | 2 | 2 | 2 | 1 | 2 | 3 | 3 | 1 | 1  | 1 | 3 | 3  | 1 | 3 | 1 | 5 | 4 | 1 | 4  | 1  |
| PHY | 7 | 7 | 1 | 4 | 6 | 7 | 2 | 4 | 6 | 6 | 2 | 1 | 2 | 2 | 3 | 6 | 2 | 1 | 2  | 1 | 6 | EM | 1 | 6 | 1 | 5 | 1 | 8 | 1  | 8  |
| PHY | 5 | 4 | 4 | 6 | 4 | 5 | 4 | 3 | 6 | 6 | 2 | 2 | 3 | 4 | 3 | 2 | 5 | 1 | 1  | 1 | 1 |    | 1 | 1 | 1 | 5 | 6 | 1 | 6  | 1  |
| PHY | 5 | 5 | 3 | 3 | 5 | 6 | 2 | 2 | 7 | 7 | 1 | 1 | 4 | 1 | 3 | 4 | 2 | 1 | 2  | 2 | 1 |    | 2 | 1 | 1 | 5 | 6 | 1 | 6  | 1  |
| PHY | 4 | 3 | 3 | 7 | 4 | 3 | 3 | 6 | 7 | 7 | 2 | 3 | 3 | 5 | 6 | 4 | 3 | 1 | 2  | 2 | 1 |    | 2 | 1 | 1 | 5 | 6 | 1 | 6  | 1  |
| PHY | 7 | 7 | 1 | 4 | 4 | 6 | 2 | 6 | 7 | 7 | 2 | 2 | 2 | 3 | 4 | 6 | 6 | 1 | 1  | 2 | 2 |    | 1 | 1 | 1 | 5 | 4 | 3 | 4  | 3  |

|     |   |   |   |   |   |   |   |   |   |   |   |   |   |   |   |   |   |   |    |   |   |    |   |   |   |   |   |   |   |    |    |
|-----|---|---|---|---|---|---|---|---|---|---|---|---|---|---|---|---|---|---|----|---|---|----|---|---|---|---|---|---|---|----|----|
| PHY | 4 | 5 | 5 | 6 | 5 | 5 | 6 | 7 | 7 | 7 | 2 | 2 | 2 | 2 | 5 | 5 | 4 | 1 | 1  | 2 | 5 | 3  | 1 | 3 | 1 | 5 | 6 | 3 | 6 | 3  |    |
| PHY | 5 | 5 | 2 | 5 | 5 | 6 | 2 | 5 | 6 | 6 | 2 | 2 | 3 | 1 | 2 | 4 | 5 | 1 | 1  | 1 | 3 | DK | 2 | 2 | 1 | 5 | 8 | 1 | 8 | 1  |    |
| PHY | 7 | 5 | 1 | 3 | 7 | 7 | 1 | 3 | 7 | 7 | 3 | 3 | 2 | 1 | 1 | 7 | 7 | 1 | 1  | 2 | 5 | 2  | 1 | 4 | 1 | 5 | 5 | 1 | 5 | 1  |    |
| PHY | 1 | 4 | 3 | 5 | 2 | 4 | 3 | 5 | 6 | 6 | 2 | 2 | 4 | 2 | 5 | 5 | 6 | 1 | 2  | 2 | 2 |    | 2 | 2 | 1 | 2 | 5 | 2 | 5 | 2  |    |
| PHY | 5 | 5 | 6 | 3 | 6 | 2 | 6 | 2 | 7 | 7 | 7 | 7 | 3 | 2 | 2 | 7 | 4 | 1 | 3  | 2 | 1 |    | 1 | 1 | 1 | 5 | 5 | 7 | 5 | 7  |    |
| PHY | 2 | 2 | 6 | 6 | 6 | 2 | 6 | 6 | 6 | 7 | 1 | 1 | 3 | 1 | 6 | 5 | 4 | 1 | 2  | 2 | 5 | 3  | 2 | 2 | 1 | 2 | 8 | 1 | 8 | 1  |    |
| PHY | 6 | 6 | 3 | 5 | 6 | 6 | 2 | 5 | 6 | 6 | 3 | 5 | 3 | 6 | 6 | 6 | 5 | 1 | 1  | 2 | 1 |    | 1 | 1 | 1 | 2 | 6 | 2 | 6 | 2  |    |
| PHY | 4 | 6 | 3 | 3 | 5 | 6 | 2 | 4 | 7 | 7 | 2 | 2 | 3 | 2 | 2 | 4 | 4 | 1 | 1  | 2 | 4 | 3  | 1 | 2 | 1 | 5 | 6 | 1 | 6 | 1  |    |
| PHY | 3 | 3 | 3 | 3 | 4 | 4 | 4 | 4 | 7 | 5 | 1 | 2 | 2 | 2 | 4 | 4 | 3 | 1 | 1  | 2 | 1 |    | 2 | 1 | 1 | 5 | 5 | 1 | 5 | 1  |    |
| PHY | 7 | 7 | 7 | 7 | 7 | 7 | 7 | 7 | 7 | 7 | 7 | 7 | 4 | 7 | 7 | 1 | 7 | 1 | 3  | 2 | 1 |    | 1 | 1 | 1 | 6 | 8 | 8 | 8 | 8  |    |
| PHY | 5 | 6 | 3 | 3 | 6 | 6 | 2 | 3 | 7 | 7 | 3 | 3 | 3 | 1 | 3 | 6 | 3 | 1 | DK | 1 | 3 | DK | 1 | 4 | 1 | 5 | 5 | 2 | 5 | 2  |    |
| PHY | 6 | 3 | 4 | 5 | 6 | 6 | 3 | 4 | 7 | 7 | 2 | 2 | 3 | 1 | 2 | 5 | 3 | 1 | 1  | 1 | 5 | 3  | 1 | 3 | 1 | 2 | 5 | 3 | 5 | 3  |    |
| PHY | 2 | 5 | 3 | 3 | 4 | 3 | 6 | 5 | 6 | 6 | 4 | 4 | 4 | 1 | 3 | 7 | 2 | 1 | 1  | 1 | 1 |    | 1 | 1 | 1 | 5 | 2 | 2 | 2 | 2  |    |
| PHY | 7 | 5 | 1 | 4 | 6 | 7 | 2 | 4 | 6 | 7 | 1 | 1 | 4 | 1 | 2 | 7 | 5 | 1 | 3  | 1 | 1 |    | 1 | 1 | 1 | 5 | 3 | 2 | 3 | 2  |    |
| PHY | 2 | 2 | 7 | 7 | 1 | 4 | 6 | 7 | 7 | 7 | 2 | 4 | 2 | 1 | 4 | 6 | 4 | 1 | 1  | 1 | 1 |    | 2 | 1 | 1 | 2 | 6 | 1 | 6 | 1  |    |
| PHY | 6 | 4 | 1 | 4 | 6 | 4 | 2 | 4 | 7 | 7 | 2 | 2 | 2 | 2 | 3 | 3 | 4 | 1 | 1  | 1 | 1 |    | 1 | 1 | 1 | 5 | 4 | 3 | 4 | 3  |    |
| PHY | 3 | 5 | 3 | 2 | 6 | 6 | 2 | 3 | 6 | 7 | 3 | 5 | 3 | 1 | 2 | 5 | 5 | 1 | 1  | 1 | 5 | 2  | 1 | 2 | 1 | 5 | 5 | 1 | 5 | 1  |    |
| PHY | 4 | 4 | 5 | 5 | 3 | 4 | 3 | 5 | 6 | 6 | 2 | 3 | 2 | 1 | 1 | 4 | 5 | 1 | 1  | 1 | 1 |    | 1 | 1 | 1 | 5 | 4 | 1 | 4 | 1  |    |
| PHY | 2 | 5 | 5 | 6 | 5 | 5 | 5 | 6 | 6 | 7 | 3 | 3 | 2 | 1 | 2 | 5 | 5 | 1 | 1  | 1 | 1 |    | 1 | 1 | 1 | 5 | 3 | 2 | 3 | 2  |    |
| PHY | 7 | 5 | 1 | 3 | 7 | 5 | 1 | 3 | 6 | 5 | 2 | 2 | 2 | 1 | 2 | 6 | 4 | 1 | 1  | 1 | 1 |    | 1 | 1 | 1 | 5 | 3 | 4 | 3 | 4  |    |
| PHY | 6 | 7 | 1 | 6 | 7 | 6 | 6 | 1 | 6 | 5 | 1 | 2 | 2 | 1 | 1 | 3 | 5 | 1 | 1  | 1 | 5 | 3  | 1 | 3 | 1 | 5 | 5 | 2 | 5 | 2  |    |
| PHY | 3 | 3 | 5 | 6 | 5 | 4 | 5 | 7 | 6 | 6 | 1 | 3 | 3 | 1 | 2 | 6 | 4 | 1 | 1  | 1 | 1 |    | 1 | 2 | 1 | 6 | 1 | 4 | 1 | 4  |    |
| PHY | 2 | 6 | 5 | 7 | 7 | 7 | 1 | 1 | 7 | 7 | 7 | 7 | 2 | 1 | 4 | 7 | 1 | 1 | 2  | 1 | 5 | 4  | 1 | 4 | 1 | 5 | 2 | 6 | 2 | 6  |    |
| PHY | 4 | 5 | 2 | 6 | 5 | 5 | 2 | 5 | 7 | 7 | 2 | 4 | 3 | 1 | 3 | 6 | 3 | 1 | 2  | 1 | 4 | DK | 2 | 2 | 1 | 5 | 6 | 3 | 6 | 3  |    |
| PHY | 5 | 4 | 1 | 5 | 7 | 7 | 1 | 1 | 7 | 7 | 1 | 2 | 2 | 1 | 3 | 6 | 2 | 1 | 1  | 1 | 5 | 2  | 1 | 3 | 1 | 5 | 5 | 3 | 5 | 3  |    |
| PHY | 7 | 7 | 1 | 1 | 7 | 7 | 1 | 1 | 7 | 7 | 1 | 4 | 3 | 1 | 4 | 7 | 2 | 1 | 1  | 1 | 1 |    |   | 1 | 1 |   | 5 | 3 | 5 | 3  |    |
| PHY | 6 | 6 | 2 | 2 | 6 | 6 | 1 | 2 | 6 | 6 | 2 | 2 | 3 | 2 | 5 | 6 | 3 | 1 | 2  | 1 | 6 | EM |   | 1 | 6 | 1 | 5 | 1 | 6 | EM | EM |
| PHY | 2 | 2 | 3 | 5 | 5 | 5 | 3 | 6 | 5 | 7 | 1 | 1 | 3 | 5 | 5 | 5 | 3 | 1 | 1  | 1 | 1 |    | 1 | 1 | 1 | 5 | 6 | 1 | 6 | 1  |    |
| PHY | 3 | 3 | 7 | 6 | 2 | 2 | 5 | 5 | 7 | 6 | 2 | 4 | 2 | 1 | 6 | 4 | 6 | 1 | 1  | 1 | 1 |    | 1 | 1 | 1 | 5 | 4 | 2 | 4 | 2  |    |
| PHY | 6 | 7 | 1 | 6 | 7 | 6 | 6 | 1 | 6 | 5 | 1 | 2 | 2 | 1 | 1 | 3 | 5 | 1 | 1  | 1 | 5 | 3  | 1 | 3 | 1 | 5 | 5 | 2 | 5 | 2  |    |
| PHY | 6 | 7 | 1 | 6 | 7 | 6 | 6 | 1 | 6 | 5 | 1 | 2 | 2 | 1 | 1 | 3 | 5 | 1 | 1  | 1 | 5 | 3  | 1 | 3 | 1 | 5 | 5 | 2 | 5 | 2  |    |
| PHY | 6 | 3 | 6 | 5 | 6 | 5 | 4 | 4 | 6 | 6 | 2 | 2 | 3 | 1 | 4 | 4 | 3 | 1 | 1  | 1 | 1 |    | 1 | 1 | 1 | 5 | 3 | 2 | 3 | 2  |    |

|     |   |   |   |   |   |   |   |   |   |   |   |   |   |   |   |   |   |   |   |   |   |    |   |   |   |   |   |   |   |   |
|-----|---|---|---|---|---|---|---|---|---|---|---|---|---|---|---|---|---|---|---|---|---|----|---|---|---|---|---|---|---|---|
| PHY | 2 | 3 | 3 | 6 | 6 | 7 | 1 | 1 | 6 | 6 | 2 | 2 | 2 | 1 | 5 | 7 | 2 | 1 | 1 | 1 | 5 | 3  | 1 | 3 | 1 | 5 | 4 | 3 | 4 | 3 |
| PHY | 4 | 5 | 3 | 4 | 6 | 5 | 3 | 3 | 7 | 7 | 1 | 1 | 2 | 2 | 5 | 5 | 5 | 1 | 1 | 1 | 1 | 1  | 1 | 1 | 1 | 2 | 6 | 1 | 6 | 1 |
| PHY | 3 | 5 | 5 | 6 | 5 | 5 | 3 | 6 | 7 | 7 | 5 | 5 | 2 | 1 | 3 | 7 | 3 | 1 | 1 | 1 | 5 | 2  | 1 | 3 | 1 | 5 | 4 | 3 | 4 | 3 |
| PHY | 5 | 3 | 3 | 7 | 5 | 5 | 3 | 7 | 7 | 7 | 2 | 5 | 3 | 1 | 4 | 6 | 3 | 1 | 1 | 1 | 1 | 1  | 1 | 1 | 1 | 5 | 4 | 6 | 4 | 6 |
| PHY | 5 | 5 | 4 | 4 | 4 | 4 | 4 | 4 | 7 | 7 | 1 | 2 | 2 | 1 | 5 | 7 | 3 | 1 | 1 | 1 | 1 | 1  | 1 | 1 | 1 | 5 | 3 | 4 | 3 | 4 |
| PHY | 6 | 6 | 3 | 7 | 7 | 5 | 3 | 6 | 7 | 7 | 3 | 5 | 3 | 4 | 5 | 6 | 3 | 1 | 1 | 1 | 1 | 1  | 1 | 1 | 1 | 5 | 3 | 3 | 3 | 3 |
| PHY | 7 | 7 | 1 | 1 | 7 | 7 | 1 | 1 | 6 | 7 | 4 | 4 | 1 | 1 | 1 | 7 | 4 | 1 | 1 | 1 | 5 | 4  | 1 | 4 | 1 | 5 | 5 | 2 | 5 | 2 |
| PHY | 5 | 5 | 3 | 7 | 3 | 3 | 5 | 5 | 7 | 7 | 4 | 4 | 2 | 1 | 1 | 7 | 2 | 1 | 1 | 1 | 1 | 1  | 1 | 1 | 1 | 5 | 4 | 3 | 4 | 3 |
| PHY | 3 | 6 | 2 | 4 | 3 | 5 | 3 | 4 | 7 | 7 | 3 | 1 | 3 | 1 | 5 | 2 | 4 | 1 | 1 | 1 | 1 | 1  | 1 | 1 | 2 | 6 | 2 | 6 | 2 |   |
| PHY | 6 | 3 | 2 | 5 | 6 | 5 | 6 | 6 | 7 | 7 | 2 | 2 | 3 | 6 | 7 | 2 | 5 | 1 | 1 | 1 | 1 | 1  | 1 | 1 | 1 | 2 | 3 | 2 | 3 | 2 |
| PHY | 4 | 4 | 7 | 4 | 4 | 4 | 6 | 4 | 6 | 6 | 1 | 1 | 2 | 1 | 5 | 5 | 4 | 1 | 2 | 1 | 5 | 4  | 1 | 5 | 1 | 5 | 8 | 5 | 8 | 5 |
| PHY | 4 | 4 | 4 | 5 | 5 | 5 | 3 | 3 | 7 | 7 | 2 | 2 | 3 | 5 | 5 | 4 | 3 | 1 | 1 | 1 | 1 | 1  | 1 | 1 | 2 | 1 | 1 | 7 | 1 | 1 |
| PHY | 5 | 5 | 1 | 4 | 6 | 6 | 2 | 5 | 7 | 7 | 3 | 3 | 2 | 1 | 1 | 5 | 2 | 1 | 1 | 1 | 1 | 1  | 1 | 1 | 2 | 1 | 1 | 5 | 2 | 2 |
| PHY | 2 | 2 | 5 | 5 | 2 | 2 | 5 | 3 | 3 | 6 | 4 | 4 | 2 | 7 | 6 | 4 | 3 | 1 | 1 | 1 | 1 | 1  | 1 | 1 | 2 | 5 | 5 | 4 | 5 | 4 |
| PHY | 3 | 3 | 3 | 6 | 3 | 3 | 3 | 6 | 4 | 6 | 1 | 4 | 2 | 1 | 1 | 5 | 5 | 1 | 1 | 1 | 1 | 1  | 1 | 1 | 1 | 5 | 5 | 1 | 5 | 1 |
| PHY | 3 | 2 | 2 | 3 | 3 | 2 | 2 | 3 | 7 | 7 | 1 | 1 | 4 | 4 | 5 | 4 | 4 | 1 | 1 | 1 | 1 | 1  | 1 | 1 | 1 | 6 | 3 | 3 | 3 | 3 |
| PHY | 3 | 2 | 3 | 5 | 2 | 2 | 4 | 5 | 7 | 7 | 2 | 3 | 3 | 1 | 3 | 6 | 3 | 1 | 1 | 1 | 1 | 1  | 1 | 1 | 1 | 5 | 6 | 1 | 6 | 1 |
| PHY | 1 | 1 | 6 | 6 | 1 | 1 | 7 | 7 | 7 | 7 | 4 | 4 | 4 | 1 | 1 | 5 | 6 | 1 | 1 | 1 | 1 | 1  | 1 | 1 | 1 | 2 | 1 | 4 | 1 | 1 |
| PHY | 3 | 5 | 2 | 6 | 3 | 3 | 5 | 7 | 5 | 7 | 2 | 3 | 3 | 1 | 1 | 5 | 5 | 1 | 1 | 1 | 1 | 1  | 1 | 1 | 2 | 1 | 1 | 5 | 2 | 2 |
| PHY | 6 | 4 | 5 | 5 | 6 | 4 | 3 | 4 | 6 | 6 | 2 | 2 | 2 | 2 | 5 | 5 | 3 | 1 | 1 | 1 | 1 | 1  | 1 | 1 | 2 | 1 | 1 | 5 | 1 | 1 |
| PHY | 4 | 5 | 1 | 1 | 5 | 4 | 1 | 1 | 7 | 7 | 4 | 3 | 2 | 3 | 1 | 5 | 7 | 1 | 1 | 1 | 1 | 1  | 1 | 1 | 1 | 5 | 2 | 4 | 2 | 4 |
| PHY | 5 | 4 | 5 | 3 | 6 | 5 | 3 | 4 | 4 | 6 | 5 | 3 | 3 | 2 | 6 | 5 | 5 | 1 | 1 | 1 | 1 | 1  | 1 | 1 | 1 | 2 | 6 | 8 | 6 | 8 |
| PHY | 3 | 5 | 1 | 4 | 5 | 5 | 2 | 4 | 7 | 7 | 1 | 4 | 2 | 1 | 2 | 5 | 3 | 1 | 1 | 1 | 1 | 1  | 1 | 1 | 1 | 7 | 3 | 2 | 3 | 2 |
| PHY | 5 | 5 | 2 | 4 | 4 | 6 | 6 | 4 | 4 | 4 | 5 | 5 | 4 | 3 | 5 | 6 | 5 | 1 | 1 | 1 | 3 | 8  | 1 | 5 | 1 | 5 | 5 | 2 | 5 | 2 |
| PHY | 5 | 4 | 2 | 4 | 4 | 2 | 4 | 5 | 6 | 6 | 2 | 3 | 5 | 5 | 5 | 6 | 4 | 1 | 1 | 1 | 1 | 1  | 1 | 1 | 1 | 5 | 4 | 1 | 4 | 1 |
| POL | 1 | 1 | 7 | 7 | 2 | 2 | 5 | 5 | 6 | 5 | 4 | 4 | 5 | 1 | 2 | 5 | 5 | 1 | 1 | 2 | 1 | 1  | 1 | 1 | 1 | 2 | 3 | 2 | 3 | 3 |
| POL | 2 | 2 | 5 | 5 | 3 | 4 | 5 | 5 | 5 | 7 | 3 | 3 | 5 | 1 | 3 | 6 | 4 | 1 | 1 | 2 | 1 | 1  | 1 | 1 | 2 | 6 | 4 | 3 | 4 | 3 |
| POL | 4 | 5 | 2 | 4 | 3 | 3 | 3 | 3 | 7 | 7 | 4 | 4 | 5 | 2 | 4 | 6 | 5 | 1 | 1 | 2 | 4 | DK | 2 | 2 | 1 | 5 | 6 | 2 | 6 | 2 |
| POL | 2 | 2 | 6 | 5 | 4 | 4 | 4 | 4 | 7 | 7 | 7 | 5 | 5 | 1 | 5 | 5 | 3 | 1 | 1 | 2 | 1 | 1  | 1 | 1 | 2 | 5 | 5 | 1 | 5 | 1 |
| POL | 3 | 4 | 3 | 5 | 3 | 4 | 3 | 5 | 7 | 7 | 4 | 2 | 5 | 1 | 3 | 6 | 4 | 1 | 1 | 2 | 1 | 1  | 1 | 1 | 2 | 5 | 3 | 3 | 3 | 3 |
| POL | 3 | 3 | 1 | 3 | 2 | 2 | 1 | 3 | 6 | 5 | 5 | 3 | 4 | 1 | 5 | 7 | 3 | 1 | 1 | 2 | 1 | 1  | 1 | 1 | 2 | 6 | 1 | 4 | 1 | 4 |
| POL | 4 | 4 | 3 | 5 | 5 | 5 | 4 | 4 | 5 | 6 | 4 | 3 | 4 | 1 | 1 | 5 | 4 | 1 | 1 | 2 | 1 | 1  | 1 | 1 | 1 | 5 | 4 | 5 | 4 | 5 |

|     |   |   |   |   |   |   |   |   |   |   |   |   |   |   |   |   |   |   |   |   |   |   |   |   |   |   |   |   |   |   |   |
|-----|---|---|---|---|---|---|---|---|---|---|---|---|---|---|---|---|---|---|---|---|---|---|---|---|---|---|---|---|---|---|---|
| POL | 1 | 2 | 6 | 6 | 2 | 2 | 5 | 6 | 7 | 7 | 3 | 2 | 5 | 1 | 2 | 7 | 5 | 1 | 1 | 2 | 1 | 2 | 2 | 2 | 5 | 4 | 1 | 4 | 1 |   |   |
| POL | 1 | 2 | 6 | 6 | 2 | 2 | 6 | 6 | 5 | 4 | 2 | 3 | 3 | 3 | 4 | 5 | 2 | 1 | 1 | 2 | 1 | 2 | 1 | 1 | 5 | 4 | 3 | 4 | 3 |   |   |
| POL | 2 | 2 | 2 | 2 | 4 | 2 | 5 | 3 | 7 | 7 | 2 | 2 | 3 | 1 | 4 | 6 | 2 | 1 | 1 | 2 | 1 | 1 | 1 | 1 | 5 | 2 | 6 | 2 | 6 |   |   |
| POL | 2 | 2 | 6 | 6 | 2 | 1 | 4 | 5 | 7 | 7 | 2 | 2 | 5 | 1 | 3 | 7 | 3 | 1 | 1 | 2 | 1 | 2 | 1 | 1 | 5 | 5 | 2 | 5 | 2 |   |   |
| POL | 3 | 4 | 3 | 5 | 4 | 4 | 4 | 4 | 6 | 7 | 5 | 4 | 5 | 1 | 1 | 5 | 4 | 1 | 1 | 2 | 1 | 1 | 1 | 1 | 5 | 5 | 2 | 5 | 2 |   |   |
| POL | 3 | 5 | 2 | 5 | 4 | 6 | 2 | 5 | 6 | 7 | 4 | 3 | 5 | 1 | 1 | 2 | 6 | 1 | 2 | 2 | 5 | 2 | 1 | 5 | 1 | 5 | 5 | 1 | 5 | 1 |   |
| POL | 6 | 5 | 5 | 5 | 6 | 5 | 5 | 5 | 7 | 7 | 5 | 5 | 4 | 1 | 1 | 4 | 7 | 1 | 1 | 2 | 1 | 1 | 2 | 1 | 5 | 1 | 6 | 1 | 6 |   |   |
| POL | 2 | 4 | 4 | 5 | 5 | 4 | 4 | 5 | 6 | 7 | 3 | 1 | 6 | 1 | 4 | 7 | 3 | 1 | 2 | 2 | 1 | 2 | 2 | 2 | 1 | 5 | 1 | 4 | 1 | 4 |   |
| POL | 6 | 6 | 3 | 4 | 4 | 4 | 5 | 5 | 6 | 5 | 3 | 3 | 5 | 1 | 4 | 5 | 3 | 1 | 2 | 2 | 1 | 2 | 2 | 1 | 5 | 3 | 3 | 3 | 3 |   |   |
| POL | 6 | 6 | 2 | 5 | 5 | 3 | 3 | 6 | 6 | 7 | 4 | 3 | 3 | 1 | 2 | 4 | 6 | 1 | 1 | 2 | 1 | 1 | 1 | 2 | 4 | 6 | 4 | 6 |   |   |   |
| POL | 2 | 2 | 6 | 6 | 6 | 6 | 2 | 2 | 4 | 4 | 1 | 2 | 6 | 1 | 2 | 4 | 7 | 1 | 2 | 2 | 1 | 2 | 2 | 1 | 5 | 3 | 5 | 3 | 5 |   |   |
| POL | 2 | 5 | 2 | 6 | 5 | 6 | 2 | 3 | 6 | 6 | 2 | 2 | 4 | 2 | 2 | 3 | 6 | 1 | 2 | 2 | 5 | 3 | 1 | 3 | 1 | 5 | 4 | 2 | 4 | 2 |   |
| POL | 5 | 5 | 3 | 4 | 5 | 4 | 3 | 4 | 6 | 7 | 5 | 2 | 4 | 1 | 2 | 5 | 4 | 1 | 1 | 2 | 5 | 3 | 1 | 2 | 1 | 5 | 4 | 2 | 4 | 2 |   |
| POL | 3 | 4 | 3 | 5 | 3 | 3 | 2 | 5 | 7 | 6 | 3 | 2 | 6 | 1 | 4 | 5 | 4 | 1 | 2 | 2 | 5 | 2 | 1 | 2 | 1 | 5 | 4 | 2 | 4 | 2 |   |
| POL | 2 | 2 | 5 | 6 | 2 | 2 | 5 | 6 | 7 | 7 | 5 | 4 | 5 | 2 | 3 | 5 | 3 | 1 | 1 | 2 | 1 | 1 | 2 | 1 | 5 | 3 | 5 | 3 | 5 |   |   |
| POL | 5 | 5 | 3 | 4 | 4 | 4 | 4 | 4 | 5 | 5 | 4 | 3 | 6 | 1 | 1 | 4 | 4 | 1 | 2 | 2 | 5 | 2 | 1 | 4 | 1 | 5 | 5 | 2 | 5 | 2 |   |
| POL | 6 | 6 | 1 | 4 | 4 | 5 | 5 | 3 | 6 | 6 | 2 | 3 | 6 | 1 | 2 | 2 | 6 | 1 | 2 | 2 | 5 | 2 | 1 | 5 | 1 | 5 | 4 | 2 | 4 | 2 |   |
| POL | 2 | 5 | 5 | 6 | 3 | 4 | 4 | 5 | 6 | 6 | 2 | 2 | 6 | 1 | 1 | 5 | 3 | 1 | 2 | 2 | 1 | 2 | 2 | 2 | 1 | 5 | 3 | 3 | 3 | 3 |   |
| POL | 3 | 3 | 2 | 5 | 2 | 3 | 2 | 5 | 5 | 6 | 2 | 3 | 5 | 1 | 1 | 6 | 2 | 1 | 1 | 2 | 1 | 1 | 2 | 1 | 5 | 2 | 4 | 2 | 4 |   |   |
| POL | 2 | 3 | 2 | 3 | 6 | 2 | 1 | 2 | 6 | 7 | 5 | 4 | 5 | 1 | 2 | 5 | 5 | 1 | 1 | 1 | 5 | 2 | 1 | 5 | 1 | 5 | 6 | 2 | 6 | 2 |   |
| POL | 4 | 3 | 5 | 6 | 5 | 5 | 4 | 3 | 7 | 7 | 2 | 2 | 6 | 1 | 6 | 7 | 3 | 1 | 1 | 1 | 1 | 1 | 1 | 2 | 2 | 1 | 5 | 1 | 5 | 1 | 5 |
| POL | 2 | 2 | 5 | 6 | 5 | 1 | 1 | 2 | 6 | 7 | 3 | 3 | 4 | 1 | 5 | 6 | 4 | 1 | 1 | 1 | 5 | 2 | 2 | 2 | 5 | 1 | 5 | 3 | 2 | 3 | 2 |
| POL | 5 | 4 | 5 | 6 | 4 | 6 | 3 | 5 | 5 | 5 | 4 | 2 | 6 | 2 | 5 | 6 | 5 | 1 | 1 | 1 | 1 | 1 | 1 | 2 | 1 | 5 | 1 | 4 | 1 | 4 |   |
| POL | 6 | 2 | 2 | 2 | 2 | 2 | 6 | 2 | 7 | 6 | 5 | 2 | 5 | 1 | 3 | 4 | 4 | 1 | 1 | 1 | 5 | 1 | 1 | 3 | 1 | 3 | 4 | 3 | 4 | 3 |   |
| POL | 6 | 6 | 2 | 4 | 4 | 4 | 4 | 4 | 5 | 5 | 4 | 4 | 4 | 2 | 1 | 5 | 5 | 1 | 1 | 1 | 5 | 2 | 1 | 4 | 1 | 5 | 5 | 2 | 5 | 2 |   |
| POL | 6 | 4 | 6 | 4 | 5 | 5 | 3 | 5 | 6 | 5 | 5 | 6 | 3 | 2 | 3 | 5 | 4 | 1 | 1 | 1 | 1 | 1 | 1 | 1 | 7 | 4 | 2 | 4 | 2 |   |   |
| POL | 3 | 3 | 5 | 5 | 5 | 3 | 3 | 5 | 4 | 4 | 4 | 2 | 4 | 1 | 2 | 6 | 5 | 1 | 1 | 1 | 1 | 1 | 1 | 2 | 1 | 5 | 3 | 3 | 3 | 3 |   |
| POL | 5 | 5 | 5 | 5 | 5 | 5 | 5 | 5 | 6 | 6 | 4 | 3 | 5 | 1 | 2 | 6 | 5 | 1 | 1 | 1 | 1 | 1 | 1 | 1 | 5 | 5 | 1 | 5 | 1 |   |   |
| POL | 2 | 5 | 4 | 6 | 2 | 4 | 5 | 5 | 5 | 6 | 4 | 5 | 3 | 1 | 3 | 7 | 3 | 1 | 1 | 1 | 1 | 1 | 1 | 2 | 1 | 7 | 2 | 6 | 2 | 6 |   |
| POL | 3 | 3 | 3 | 5 | 3 | 3 | 3 | 5 | 6 | 7 | 5 | 2 | 5 | 1 | 1 | 4 | 5 | 1 | 1 | 1 | 1 | 1 | 1 | 2 | 1 | 5 | 4 | 1 | 4 | 1 |   |
| POL | 5 | 5 | 1 | 5 | 5 | 5 | 1 | 5 | 7 | 7 | 7 | 7 | 4 | 1 | 1 | 1 | 7 | 1 | 1 | 2 | 1 | 1 | 2 | 1 | 2 | 8 | 1 | 8 | 1 |   |   |
| POL | 6 | 3 | 6 | 7 | 5 | 5 | 4 | 5 | 6 | 7 | 5 | 5 | 4 | 1 | 1 | 1 | 7 | 1 | 1 | 2 | 1 | 1 | 2 | 1 | 2 | 2 | 5 | 4 | 1 | 4 | 1 |

|     |   |   |   |   |   |   |   |   |   |   |   |   |   |   |   |   |   |   |   |   |    |    |   |   |   |   |   |   |   |   |   |
|-----|---|---|---|---|---|---|---|---|---|---|---|---|---|---|---|---|---|---|---|---|----|----|---|---|---|---|---|---|---|---|---|
| POL | 2 | 2 | 3 | 5 | 4 | 4 | 4 | 4 | 7 | 7 | 2 | 2 | 5 | 1 | 1 | 5 | 5 | 1 | 1 | 2 | 5  | 2  | 1 | 5 | 1 | 5 | 4 | 2 | 4 | 2 |   |
| POL | 5 | 5 | 1 | 1 | 3 | 5 | 1 | 2 | 7 | 7 | 3 | 4 | 5 | 1 | 1 | 5 | 6 | 1 | 1 | 2 | 5  | 1  | 1 | 5 | 1 | 5 | 4 | 4 | 4 | 4 |   |
| POL | 5 | 3 | 5 | 5 | 7 | 7 | 3 | 5 | 7 | 7 | 4 | 2 | 3 | 1 | 7 | 7 | 2 | 1 | 1 | 1 | 1  |    | 2 | 2 | 1 | 3 | 5 | 2 | 5 | 2 |   |
| POL | 3 | 4 | 4 | 4 | 1 | 4 | 7 | 5 | 7 | 6 | 6 | 4 | 6 | 1 | 1 | 5 | 6 | 1 | 1 | 2 | 5  | 2  | 1 |   |   |   | 2 | 7 | 2 | 7 |   |
| POL | 5 | 3 | 4 | 4 | 5 | 4 | 3 | 5 | 7 | 2 | 2 | 2 | 3 | 1 | 2 | 5 | 5 | 1 | 1 | 2 | 1  |    | 1 | 2 | 1 | 5 | 5 | 2 | 5 | 2 |   |
| POL | 5 | 7 | 1 | 1 | 2 | 5 | 1 | 1 | 7 | 7 | 5 | 5 | 3 | 1 | 1 | 6 | 4 | 1 | 1 | 2 | 5  | 1  | 1 | 5 | 1 | 5 | 4 | 3 | 4 | 3 |   |
| POL | 5 | 7 | 1 | 5 | 5 | 6 | 1 | 3 | 7 | 7 | 2 | 2 | 3 | 1 | 4 | 4 | 5 | 1 | 1 | 2 | 1  |    | 1 | 1 | 2 | 5 | 2 | 4 | 2 | 4 |   |
| POL | 5 | 4 | 3 | 5 | 5 | 5 | 3 | 3 | 6 | 4 | 2 | 2 | 3 | 1 | 4 | 6 | 3 | 1 | 1 | 4 | PU | 1  |   | 2 | 2 | 1 | 5 | 4 | 3 | 4 | 3 |
| POL | 2 | 2 | 6 | 6 | 2 | 2 | 6 | 5 | 5 | 7 | 4 | 2 | 2 | 1 | 5 | 5 | 3 | 1 | 1 | 2 | 1  |    | 1 | 3 | 1 | 5 | 1 | 5 | 1 | 5 |   |
| POL | 3 | 3 | 5 | 5 | 3 | 3 | 5 | 5 | 7 | 7 | 5 | 3 | 5 | 1 | 4 | 6 | 3 | 1 | 1 | 1 | 2  |    | 1 | 2 | 1 | 5 | 4 | 2 | 4 | 2 |   |
| POL | 1 | 1 | 7 | 7 | 3 | 3 | 5 | 5 | 6 | 6 | 6 | 3 | 5 | 1 | 4 | 4 | 6 | 1 | 1 | 2 | 1  |    | 1 | 2 | 1 | 5 | 5 | 2 | 5 | 2 |   |
| POL | 4 | 4 | 1 | 5 | 2 | 6 | 1 | 4 | 6 | 7 | 3 | 4 | 4 | 1 | 2 |   | 3 | 1 | 1 | 2 | 4  | 1  | 1 | 2 | 1 | 5 | 4 | 2 | 4 | 2 |   |
| POL | 1 | 1 | 1 | 1 | 1 | 1 | 1 | 3 | 4 | 7 | 4 | 4 | 5 | 1 | 1 | 2 | 6 | 1 | 1 | 2 | 4  | 2  | 1 | 2 | 1 | 6 | 6 | 1 | 6 | 1 |   |
| POL | 4 | 5 | 1 | 1 | 5 | 4 | 2 | 3 | 5 | 7 | 7 | 4 | 5 | 1 | 3 | 7 | 4 | 1 | 1 | 2 | 1  |    | 2 | 2 | 1 | 5 | 4 | 1 | 4 | 1 |   |
| POL | 3 | 3 | 2 | 3 | 3 | 3 | 3 | 3 | 5 | 6 | 3 | 3 | 5 | 4 | 3 | 3 | 5 | 1 | 2 | 2 | 5  | 3  | 1 | 5 | 1 | 5 | 4 | 2 | 4 | 2 |   |
| POL | 2 | 2 | 3 | 5 | 3 | 3 | 5 | 5 | 6 | 6 | 3 | 3 | 4 | 1 | 3 | 7 | 2 | 1 | 1 | 1 | 1  |    | 1 | 2 | 1 | 7 | 1 | 5 | 1 | 5 |   |
| POL | 3 | 5 | 3 | 6 | 3 | 5 | 3 | 6 | 6 | 6 | 3 | 5 | 6 | 1 | 4 | 7 | 3 | 1 | 1 | 1 | 1  |    | 1 | 2 | 2 | 1 | 5 | 2 | 3 | 2 | 3 |
| POL | 2 | 2 | 5 | 5 | 3 | 5 | 5 | 3 | 6 | 6 | 4 | 2 | 4 | 5 | 5 | 5 | 4 | 1 | 1 | 1 | 1  |    | 1 | 2 | 1 | 1 | 7 | 1 | 4 | 1 | 4 |
| POL | 3 | 2 | 5 | 5 | 4 | 4 | 4 | 4 | 5 | 6 | 4 | 2 | 5 | 1 | 5 | 7 | 3 | 1 | 1 | 1 | 1  |    | 1 | 2 | 2 | 1 | 5 | 4 | 4 | 4 | 4 |
| POL | 6 | 6 | 1 | 7 | 4 | 5 | 2 | 6 | 6 | 7 | 3 | 2 | 4 | 1 | 3 | 6 | 2 | 1 | 1 | 1 | 1  |    | 1 | 2 | 1 | 1 | 5 | 4 | 2 | 4 | 2 |
| POL | 1 | 2 | 3 | 3 | 1 | 4 | 3 | 2 | 2 | 2 | 6 | 6 | 4 | 2 | 3 | 3 | 7 | 1 | 1 | 1 | 5  | 2  | 1 | 6 | 1 | 5 | 2 | 5 | 2 | 5 |   |
| POL | 5 | 6 | 1 | 2 | 5 | 6 | 1 | 2 | 7 | 7 | 6 | 5 | 6 | 1 | 2 | 7 | 2 | 1 | 1 | 1 | 5  | 2  | 2 | 4 | 1 | 5 | 4 | 4 | 4 | 4 |   |
| POL | 5 | 5 | 1 | 4 | 7 | 6 | 1 | 4 | 4 | 6 | 2 | 3 | 4 | 1 | 1 | 2 | 6 | 1 | 1 | 1 | 5  | DK | 1 | 5 | 1 | 5 | 1 | 6 | 1 | 6 |   |
| POL | 5 | 5 | 3 | 5 | 6 | 6 | 4 | 4 | 6 | 6 | 5 | 6 | 4 | 1 | 2 | 5 | 5 | 1 | 1 | 1 | 1  |    | 1 | 1 | 1 | 5 | 4 | 4 | 4 | 4 |   |
| POL | 4 | 5 | 3 | 5 | 4 | 4 | 4 | 4 | 5 | 7 | 5 | 2 | 4 | 1 | 5 | 7 | 2 | 1 | 1 | 1 | 1  |    | 2 | 2 | 1 | 5 | 1 | 4 | 1 | 4 |   |
| POL | 4 | 4 | 1 | 4 | 5 | 4 | 1 | 2 | 3 | 3 | 2 | 7 | 6 | 6 | 7 | 7 | 1 | 1 | 1 | 1 | 1  |    | 1 | 2 | 1 | 6 | 1 | 4 | 1 | 4 |   |
| POL | 3 | 5 | 7 | 5 | 3 | 3 | 6 | 6 | 7 | 7 | 6 | 5 | 6 | 1 | 4 | 3 | 6 | 1 | 1 | 1 | 1  |    | 2 | 1 | 1 | 5 | 4 | 5 | 4 | 5 |   |
| POL | 4 | 5 | 3 | 5 |   |   |   |   | 7 | 7 | 5 | 2 | 4 | 1 | 5 | 7 | 1 | 1 | 2 | 1 | 4  | 3  | 2 | 3 | 1 | 5 | 4 | 3 | 4 | 3 |   |
| POL | 5 | 5 | 4 | 6 | 6 | 6 | 2 | 6 | 7 | 7 | 5 | 5 | 4 | 1 | 4 | 5 | 3 | 1 | 1 | 1 | 5  | 3  | 1 | 3 | 1 | 5 | 3 | 3 | 3 | 3 |   |
| POL | 1 | 3 | 5 | 5 | 5 | 3 | 4 | 5 | 6 | 6 | 3 | 4 | 5 | 1 | 3 | 5 | 5 | 1 | 2 | 1 | 1  |    | 1 | 1 | 1 | 5 | 5 | 2 | 5 | 2 |   |
| POL | 4 | 7 | 2 | 2 | 3 | 6 | 1 | 4 | 5 | 7 | 2 | 2 | 5 | 1 | 2 | 5 | 5 | 1 | 1 | 1 | 5  | 2  | 1 | 3 | 1 | 5 | 3 | 3 | 3 | 3 |   |
| POL | 2 | 4 | 1 | 2 |   |   |   |   | 4 | 4 | 4 | 4 | 5 | 3 |   | 6 | 4 | 1 | 2 | 1 | 5  | 3  | 1 | 4 | 1 | 5 | 4 | 2 | 4 | 2 |   |

|     |   |   |   |   |   |   |   |   |   |   |   |   |   |   |   |   |   |   |    |   |   |    |   |   |   |   |   |   |    |    |
|-----|---|---|---|---|---|---|---|---|---|---|---|---|---|---|---|---|---|---|----|---|---|----|---|---|---|---|---|---|----|----|
| POL | 5 | 5 | 6 | 7 | 3 | 3 | 4 | 3 | 7 | 7 | 7 | 5 | 4 | 1 | 1 | 2 | 6 | 1 | 1  | 1 | 3 | DK | 1 | 1 | 1 | 5 | 6 | 2 | 6  | 2  |
| POL | 1 | 2 | 5 | 3 | 3 | 3 | 6 | 3 | 5 | 6 | 2 | 3 | 4 | 1 | 4 | 5 | 3 | 1 | 1  | 1 | 1 |    | 2 | 1 | 1 | 6 | 2 | 5 | 2  | 5  |
| POL | 5 | 5 | 2 | 6 | 4 | 5 | 4 | 6 | 3 | 4 | 6 | 2 | 4 | 1 | 5 | 7 | 2 | 1 | 1  | 1 | 5 | 3  | 1 | 5 | 1 | 5 | 6 | 1 | 6  | 1  |
| POL | 6 | 6 | 2 | 3 | 5 | 5 | 3 | 3 | 5 | 7 | 2 | 4 | 3 | 2 | 4 | 2 | 4 | 1 | 1  | 1 | 1 |    | 1 | 2 | 1 | 5 | 1 | 4 | 1  | 4  |
| POL | 4 | 4 | 5 | 5 | 4 | 4 | 4 | 4 | 5 | 6 | 5 | 3 | 4 | 1 | 1 | 5 | 6 | 1 | 2  | 1 | 1 |    | 1 | 1 | 1 | 5 | 5 | 4 | 5  | 4  |
| POL | 2 | 1 | 4 | 6 | 2 | 4 | 1 | 5 | 7 | 7 | 5 | 4 | 5 | 1 | 2 | 5 | 5 | 1 | DK | 1 | 1 |    | 2 | 1 | 1 | 5 | 4 | 5 | 4  | 5  |
| POL | 1 | 1 | 5 | 6 | 6 | 5 | 1 | 2 | 7 | 5 | 5 | 2 | 5 | 1 | 2 | 7 | 2 | 1 | 2  | 1 | 5 | 2  | 2 | 4 | 1 | 5 | 5 | 2 | 5  | 2  |
| POL | 1 | 1 | 6 | 6 | 1 | 1 | 6 | 6 | 7 | 7 | 2 | 2 | 6 | 1 | 1 | 6 | 6 | 1 | 2  | 1 | 3 | DK | 2 | 3 | 1 | 5 | 4 | 3 | 4  | 3  |
| POL | 5 | 6 | 2 | 5 | 6 | 6 | 2 | 2 | 5 | 7 | 2 | 2 | 2 | 2 | 6 | 7 | 1 | 1 | 2  | 1 | 1 |    | 2 | 1 | 1 | 2 | 6 | 2 | 6  | 2  |
| POL | 6 | 6 | 2 | 2 | 2 | 2 | 7 | 6 | 7 | 6 | 2 | 3 | 4 | 1 | 2 | 6 | 5 | 1 | 1  | 1 | 1 |    | 1 | 2 | 1 | 5 | 3 | 4 | 3  | 4  |
| POL | 3 | 3 | 1 | 6 | 4 | 3 | 5 | 5 | 6 | 6 | 6 | 5 | 3 | 1 | 4 | 6 | 5 | 1 | 1  | 1 | 5 | 2  | 1 | 5 | 1 | 5 | 8 | 1 | 8  | 1  |
| POL | 3 | 4 | 5 | 5 | 3 | 4 | 5 | 5 | 6 | 7 | 3 | 1 | 5 | 1 | 1 | 5 | 5 | 1 | 1  | 2 | 1 |    | 1 | 1 | 1 | 5 | 4 | 3 | 4  | 3  |
| POL | 4 | 5 | 4 | 4 | 4 | 4 | 4 | 5 | 6 | 6 | 2 | 2 | 5 | 1 | 3 | 2 | 4 | 1 | 1  | 2 | 1 |    | 1 | 1 | 1 | 5 | 4 | 2 | 4  | 2  |
| POL | 3 | 4 | 4 | 6 | 5 | 5 | 2 | 3 | 7 | 7 | 2 | 2 | 5 | 1 | 1 | 7 | 2 | 1 | 1  | 2 | 1 |    | 1 | 1 | 1 | 5 | 5 | 3 | 5  | 3  |
| POL | 3 | 4 | 5 | 6 | 6 | 6 | 1 | 2 | 7 | 7 | 3 | 3 | 5 | 1 | 3 | 6 | 6 | 1 | 1  | 2 | 1 |    | 2 | 1 | 1 | 7 | 2 | 7 | 2  | 7  |
| POL | 5 | 5 | 1 | 4 | 5 | 6 | 1 | 3 | 6 | 6 | 4 | 2 | 5 | 1 | 4 | 5 | 6 | 1 | 1  | 2 | 6 | EM | 1 | 6 | 1 | 5 | 1 | 5 | EM | EM |
| POL | 5 | 5 | 3 | 4 | 5 | 5 | 4 | 5 | 6 | 6 | 4 | 4 | 5 | 1 | 1 | 1 | 7 | 1 | 2  | 1 | 1 |    | 1 | 1 | 1 | 5 | 1 | 3 | 1  | 3  |
| POL | 3 | 2 | 1 | 2 | 2 | 3 | 2 | 2 | 7 | 7 | 5 | 4 | 3 | 1 | 2 | 5 | 3 | 1 | 1  | 1 | 6 | AD | 1 | 4 | 1 | 5 | 5 | 2 | 5  | 2  |
| POL | 3 | 3 | 4 | 4 | 3 | 3 | 3 | 4 | 6 | 7 | 3 | 3 | 4 | 1 | 3 | 5 | 3 | 1 | 1  | 2 | 5 | 2  | 2 | 2 | 1 | 5 | 4 | 2 | 4  | 2  |
| POL | 1 | 1 | 7 | 7 | 2 | 3 | 6 | 5 | 7 | 7 | 3 | 2 | 6 | 1 | 2 | 5 | 5 | 1 | 1  | 2 | 1 |    | 1 | 1 | 1 | 5 | 7 | 2 | 7  | 2  |
| POL | 2 | 2 | 3 | 6 | 5 | 3 | 5 | 7 | 7 | 6 | 3 | 2 | 4 | 2 | 3 | 5 | 3 | 1 | 2  | 1 | 1 |    | 2 | 1 | 1 | 5 | 4 | 2 | 4  | 2  |
| POL | 5 | 5 | 3 | 4 | 5 | 4 | 5 | 5 | 6 | 6 | 6 | 5 | 5 | 1 | 4 | 5 | 4 | 1 | 2  | 1 | 1 |    | 1 | 1 | 1 | 5 | 3 | 3 | 3  | 3  |
| POL | 6 | 5 | 3 | 6 | 4 | 4 | 4 | 4 | 4 | 6 | 5 | 5 | 4 | 5 | 4 | 5 | 4 | 1 | 1  | 2 | 1 |    | 2 | 2 | 1 | 2 | 4 | 2 | 4  | 2  |
| POL | 3 | 4 | 5 | 5 | 5 | 3 | 5 | 6 | 6 | 7 | 5 | 5 | 4 | 1 | 5 | 3 | 5 | 1 | 2  | 2 | 1 |    | 2 | 2 | 1 | 5 | 4 | 2 | 4  | 2  |
| POL | 2 | 6 | 6 | 6 | 5 | 5 | 5 | 5 | 6 | 7 | 5 | 2 | 4 | 1 | 6 | 7 | 3 | 1 | 2  | 1 | 5 | 3  | 1 | 3 | 1 | 5 | 5 | 2 | 5  | 2  |
| POL | 3 | 2 | 2 | 4 | 3 | 3 | 3 | 3 | 6 | 6 | 3 | 2 | 5 | 1 | 3 | 7 | 4 | 1 | 1  | 1 | 1 |    | 1 | 1 | 1 | 5 | 3 | 4 | 3  | 4  |
| POL | 5 | 5 | 1 | 3 | 6 | 6 | 1 | 3 | 7 | 7 | 6 | 3 | 4 | 1 | 5 | 7 | 3 | 1 | 2  | 1 | 1 |    | 2 | 1 | 1 | 5 | 4 | 3 | 4  | 3  |
| POL | 5 | 5 | 6 | 5 | 6 | 4 | 4 | 5 | 6 | 6 | 3 | 3 | 5 | 1 | 1 | 5 | 6 | 1 | 2  | 2 | 1 |    | 1 | 2 | 2 | 5 | 3 | 6 | 3  | 6  |
| POL | 3 | 3 | 2 | 5 | 4 | 4 | 2 | 5 | 7 | 7 | 7 | 4 | 4 | 1 | 5 | 4 | 4 | 1 | 2  | 1 | 1 |    | 2 | 1 | 1 | 5 | 1 | 5 | 1  | 5  |
| POL | 4 | 7 | 1 | 5 | 1 | 6 | 1 | 1 | 7 | 7 | 5 | 2 | 3 | 1 | 1 | 5 | 6 | 1 | 1  | 1 | 5 | 4  | 1 | 5 | 1 | 5 | 2 | 4 | 2  | 4  |
| POL | 2 | 2 | 6 | 6 | 4 | 2 | 6 | 6 | 7 | 7 | 3 | 3 | 6 | 1 | 5 | 7 | 2 | 1 | 1  | 2 | 1 |    | 2 | 2 | 1 | 5 | 1 | 5 | 1  | 5  |
| POL | 5 | 5 | 2 | 4 | 7 | 7 | 2 | 2 | 4 | 4 | 4 | 4 | 3 | 1 | 7 | 4 | 6 | 1 | 1  | 2 | 1 |    | 1 | 2 | 1 | 5 | 1 | 6 | 1  | 6  |



|     |   |   |   |   |   |   |   |   |   |   |   |   |   |   |   |   |   |   |   |   |   |   |   |   |   |   |   |   |   |   |
|-----|---|---|---|---|---|---|---|---|---|---|---|---|---|---|---|---|---|---|---|---|---|---|---|---|---|---|---|---|---|---|
| POL | 6 | 6 | 3 | 3 | 6 | 5 | 3 | 3 | 5 | 7 | 3 | 2 | 4 | 5 | 6 | 7 | 2 | 1 | 2 | 2 | 4 | 2 | 2 | 2 | 1 | 5 | 5 | 2 | 5 | 2 |
| POL | 3 | 4 | 4 | 5 | 4 | 4 | 5 | 5 | 6 | 7 | 3 | 4 | 6 | 2 | 2 | 3 | 6 | 1 | 2 | 2 | 1 | 2 | 1 | 1 | 5 | 1 | 3 | 1 | 3 |   |
| POL | 4 | 4 | 4 | 4 | 4 | 4 | 4 | 4 | 6 | 7 | 5 | 2 | 3 | 1 | 1 | 2 | 6 | 1 | 1 | 1 | 1 | 1 | 1 | 1 | 5 | 3 | 4 | 3 | 4 |   |
| POL | 2 | 2 | 4 | 7 | 2 | 2 | 5 | 5 | 7 | 7 | 2 | 2 | 3 | 1 | 2 | 3 | 3 | 1 | 2 | 1 | 1 | 1 | 1 | 5 | 3 | 4 | 3 | 4 |   |   |
| POL | 7 | 5 | 5 | 7 | 5 | 6 | 4 | 6 | 7 | 7 | 6 | 6 | 3 | 2 | 7 | 6 | 7 | 1 | 2 | 2 | 1 | 1 | 2 | 1 | 2 | 5 | 2 | 5 | 2 |   |
| POL | 5 | 5 | 2 | 3 | 4 | 4 | 5 | 3 | 5 | 7 | 5 | 2 | 2 | 1 | 3 | 7 | 4 | 1 | 1 | 1 | 4 | 2 | 1 | 1 | 1 | 7 | 4 | 2 | 4 | 2 |
| POL | 5 | 5 | 3 | 2 | 5 | 5 | 2 | 3 | 6 | 7 | 5 | 3 | 4 | 1 | 4 | 6 | 3 | 1 | 2 | 1 | 5 | 2 | 1 | 3 | 1 | 5 | 5 | 1 | 5 | 1 |
| POL | 1 | 1 | 4 | 4 | 1 | 1 | 5 | 5 | 6 | 6 | 3 | 2 | 6 | 1 | 1 | 3 | 5 | 1 | 2 | 1 | 4 | 2 | 1 | 2 | 1 | 5 | 6 | 1 | 6 | 1 |
| POL | 3 | 3 | 4 | 6 | 4 | 4 | 4 | 4 | 5 | 7 | 4 | 3 | 4 | 1 | 2 | 5 | 5 | 1 | 2 | 1 | 1 | 1 | 1 | 1 | 5 | 4 | 1 | 4 | 1 |   |
| PSY | 2 | 2 | 2 | 3 | 2 | 2 | 3 | 4 | 7 | 7 | 4 | 2 | 6 | 1 | 3 | 6 | 5 | 1 | 1 | 2 | 5 | 1 | 2 | 4 | 1 | 5 | 3 | 3 | 3 | 3 |
| PSY | 4 | 5 | 6 | 6 | 3 | 4 | 5 | 5 | 5 | 7 | 7 | 5 | 5 | 1 | 4 | 5 | 5 | 1 | 2 | 2 | 2 | 2 | 2 | 1 | 2 | 5 | 3 | 5 | 3 |   |
| PSY | 6 | 1 | 5 | 7 | 4 | 4 | 5 | 5 | 4 | 4 | 4 | 4 | 5 | 1 | 1 | 5 | 7 | 1 | 1 | 2 | 2 | 1 | 2 | 1 | 5 | 5 | 1 | 5 | 1 |   |
| PSY | 3 | 2 | 2 | 4 | 4 | 4 | 3 | 4 | 1 | 1 | 1 | 5 | 4 | 1 | 2 | 2 | 6 | 1 | 2 | 2 | 1 | 1 | 2 | 1 | 5 | 4 | 2 | 4 | 2 |   |
| PSY | 2 | 5 | 2 | 3 | 3 | 5 | 2 | 3 | 7 | 7 | 6 | 4 | 8 | 2 | 1 | 6 | 2 | 1 | 1 | 2 | 5 | 2 | 1 | 4 | 1 | 5 | 5 | 3 | 5 | 3 |
| PSY | 5 | 5 | 2 | 3 | 6 | 6 | 2 | 3 | 4 | 5 | 7 | 7 | 8 | 2 | 3 | 7 | 5 | 1 | 1 | 2 | 2 | 2 | 2 | 1 | 5 | 1 | 8 | 1 | 8 |   |
| PSY | 2 | 3 | 5 | 5 | 2 | 3 | 6 | 6 | 6 | 7 | 5 | 5 | 7 | 1 | 1 | 7 | 6 | 1 | 1 | 2 | 1 | 1 | 2 | 1 | 5 | 4 | 2 | 4 | 2 |   |
| PSY | 4 | 4 | 6 | 7 | 6 | 5 | 6 | 6 | 7 | 7 | 4 | 4 | 7 | 5 | 7 | 7 | 6 | 1 | 1 | 2 | 1 | 2 | 1 | 1 | 6 | 6 | 2 | 6 | 2 |   |
| PSY | 2 | 2 | 6 | 5 | 5 | 6 | 3 | 3 | 6 | 7 | 4 | 2 | 7 | 1 | 5 | 5 | 6 | 1 | 2 | 2 | 3 | 2 | 2 | 4 | 1 | 5 | 6 | 1 | 6 | 1 |
| PSY | 2 | 2 | 4 | 4 | 3 | 5 | 3 | 6 | 7 | 7 | 3 | 4 | 8 | 1 | 3 | 5 | 4 | 1 | 2 | 2 | 5 | 1 | 2 | 3 | 1 | 5 | 5 | 1 | 5 | 1 |
| PSY | 6 | 5 | 6 | 4 | 3 | 3 | 5 | 5 | 7 | 7 | 5 | 4 | 8 | 1 | 4 | 6 | 5 | 1 | 2 | 2 | 1 | 2 | 1 | 1 | 5 | 6 | 2 | 6 | 2 |   |
| PSY | 3 | 3 | 5 | 5 | 1 | 2 | 6 | 5 | 7 | 7 | 5 | 5 | 9 | 1 | 1 | 2 | 7 | 1 | 2 | 2 | 1 | 2 | 1 | 1 | 5 | 8 | 1 | 8 | 1 |   |
| PSY | 2 | 3 | 6 | 5 | 3 | 3 | 5 | 5 | 7 | 7 | 5 | 4 | 8 | 1 | 1 | 5 | 7 | 1 | 1 | 2 | 3 | 3 | 2 | 5 | 1 | 5 | 5 | 2 | 5 | 2 |
| PSY | 2 | 1 | 3 | 5 | 3 | 3 | 5 | 4 | 7 | 7 | 6 | 5 | 4 | 1 | 3 | 6 | 5 | 1 | 2 | 2 | 2 | 2 | 2 | 1 | 5 | 3 | 3 | 3 | 3 |   |
| PSY | 4 | 4 | 1 | 2 | 4 | 4 | 5 | 1 | 5 | 3 | 2 | 2 | 4 | 1 | 4 | 7 | 4 | 1 | 1 | 1 | 5 | 2 | 1 | 3 | 1 | 5 | 4 | 2 | 4 | 2 |
| PSY | 2 | 1 | 7 | 7 | 1 | 1 | 6 | 7 | 7 | 6 | 6 | 3 | 7 | 1 | 1 | 5 | 6 | 1 | 1 | 1 | 1 | 1 | 2 | 1 | 1 | 5 | 4 | 4 | 4 | 4 |
| PSY | 2 | 2 | 4 | 6 | 2 | 2 | 5 | 5 | 7 | 7 | 3 | 1 | 6 | 1 | 1 | 1 | 7 | 1 | 1 | 1 | 5 | 1 | 1 | 3 | 1 | 4 | 1 | 4 | 1 |   |
| PSY | 6 | 6 | 5 | 5 | 5 | 5 | 6 | 5 | 7 | 7 | 5 | 6 | 4 | 1 | 3 | 5 | 6 | 1 | 2 | 1 | 2 | 2 | 1 | 1 | 5 | 3 | 3 | 3 | 3 |   |
| PSY | 6 | 5 | 5 | 5 | 5 | 5 | 5 | 5 | 5 | 6 | 5 | 4 | 5 | 2 | 3 | 4 | 6 | 2 | 2 | 1 | 1 | 1 | 2 | 1 | 5 | 6 | 1 | 6 | 1 |   |
| PSY | 4 | 3 | 3 | 5 | 4 | 4 | 5 | 5 | 4 | 4 | 4 | 3 | 6 | 1 | 2 | 5 | 6 | 1 | 1 | 2 | 5 | 1 | 1 | 3 | 1 | 5 | 4 | 2 | 4 | 2 |
| PSY | 4 | 4 | 2 | 5 | 3 | 4 | 3 | 4 | 7 | 7 | 7 | 5 | 6 | 2 | 3 | 6 | 5 | 1 | 1 | 1 | 2 | 2 | 1 | 1 | 5 | 5 | 2 | 5 | 2 |   |
| PSY | 5 | 5 | 2 | 4 | 5 | 5 | 4 | 3 | 6 | 6 | 2 | 4 | 8 | 2 | 2 | 7 | 2 | 1 | 1 | 2 | 1 | 1 | 2 | 1 | 5 | 3 | 5 | 3 | 5 |   |
| PSY | 3 | 3 | 4 | 3 | 4 | 4 | 4 | 4 | 7 | 7 | 6 | 6 | 5 | 1 | 4 | 1 | 6 | 1 | 1 | 2 | 1 | 1 | 2 | 1 | 5 | 4 | 1 | 4 | 1 |   |



|     |   |   |   |   |   |   |   |   |   |   |   |   |   |   |   |   |   |   |   |   |   |    |   |   |   |   |   |   |   |   |
|-----|---|---|---|---|---|---|---|---|---|---|---|---|---|---|---|---|---|---|---|---|---|----|---|---|---|---|---|---|---|---|
| PSY | 5 | 3 | 3 | 7 | 4 | 4 | 4 | 4 | 6 | 6 | 3 | 3 | 6 | 1 | 1 | 2 | 7 | 1 | 1 | 2 | 1 | 1  | 1 | 1 | 5 | 8 | 1 | 8 | 1 |   |
| PSY | 6 | 3 | 2 | 6 | 3 | 2 | 6 | 6 | 5 | 6 | 6 | 5 | 6 | 1 | 5 | 7 | 5 | 1 | 2 | 2 | 2 | 2  | 1 | 1 | 2 | 6 | 2 | 6 | 2 |   |
| PSY | 4 | 2 | 7 | 6 | 5 | 3 | 5 | 4 | 7 | 7 | 7 | 7 | 7 | 1 | 1 | 1 | 7 | 1 | 1 | 2 | 1 | 2  | 1 | 1 | 5 | 4 | 2 | 4 | 2 |   |
| PSY | 2 | 2 | 2 | 2 | 2 | 2 | 2 | 2 | 6 | 6 | 6 | 4 | 6 | 2 | 2 | 4 | 6 | 1 | 1 | 2 | 5 | 4  | 1 | 6 | 1 | 5 | 1 | 7 | 1 | 7 |
| PSY | 1 | 1 | 1 | 1 | 1 | 1 | 1 | 1 | 6 | 7 | 4 | 4 | 3 | 1 | 1 | 7 | 1 | 1 | 1 | 2 | 5 | 2  | 1 | 5 | 1 | 5 | 1 | 4 | 1 | 4 |
| PSY | 3 | 3 | 3 | 7 | 2 | 2 | 3 | 7 | 4 | 6 | 4 | 4 | 7 | 1 | 1 | 1 | 7 | 1 | 1 | 2 | 1 | 2  | 1 | 1 | 5 | 2 | 3 | 2 | 3 |   |
| PSY | 3 | 3 | 5 | 5 | 3 | 3 | 5 | 5 | 6 | 6 | 6 | 6 | 6 | 1 | 1 | 4 | 6 | 1 | 1 | 2 | 1 | 1  | 1 | 1 | 5 | 5 | 2 | 5 | 2 |   |
| PSY | 1 | 5 | 2 | 2 | 3 | 5 | 3 | 3 | 6 | 7 | 3 | 5 | 6 | 1 | 1 | 6 | 7 | 1 | 2 | 2 | 5 | DK | 1 | 4 | 1 | 5 | 2 | 5 | 2 | 5 |
| PSY | 4 | 5 | 3 | 3 | 4 | 4 | 2 | 3 | 6 | 6 | 5 | 5 | 7 | 2 | 2 | 5 | 5 | 1 | 1 | 1 | 5 | 1  | 2 | 3 | 1 | 5 | 4 | 2 | 4 | 2 |
| PSY | 4 | 5 | 2 | 2 | 4 | 5 | 3 | 4 | 4 | 5 | 5 | 4 | 8 | 1 | 3 | 5 | 6 | 1 | 1 | 2 | 5 | 1  | 1 | 5 | 1 | 5 | 5 | 2 | 5 | 2 |
| PSY | 2 | 3 | 1 | 5 | 3 | 3 | 1 | 4 | 6 | 7 | 6 | 4 | 8 | 1 | 2 | 5 | 5 | 1 | 1 | 1 | 4 | 2  | 2 | 2 | 1 | 5 | 4 | 2 | 4 | 2 |
| PSY | 5 | 5 | 2 | 3 | 2 | 4 | 4 | 4 | 5 | 6 | 6 | 5 | 5 | 1 | 1 | 4 | 5 | 1 | 1 | 2 | 1 | 1  | 1 | 1 | 5 | 4 | 1 | 4 | 1 |   |
| PSY | 3 | 5 | 4 | 5 | 5 | 5 | 3 | 6 | 5 | 6 | 3 | 3 | 5 | 2 | 4 | 2 | 5 | 1 | 1 | 1 | 1 | 2  | 1 | 1 | 5 | 5 | 1 | 5 | 1 |   |
| PSY | 4 | 4 | 1 | 6 | 3 | 4 | 3 | 3 | 5 | 7 | 7 | 5 | 8 | 1 | 5 | 7 | 4 | 1 | 1 | 2 | 1 | 2  | 2 | 1 | 5 | 2 | 7 | 2 | 7 |   |
| PSY | 3 | 3 | 3 | 5 | 4 | 4 | 4 | 3 | 6 | 6 | 2 | 3 | 6 | 1 | 5 | 5 | 5 | 1 | 1 | 1 | 1 | 2  | 1 | 1 | 2 | 4 | 1 | 4 | 1 |   |
| PSY | 5 | 5 | 4 | 6 | 6 | 5 | 3 | 5 | 6 | 6 | 7 | 3 | 5 | 1 | 2 | 7 | 5 | 1 | 1 | 1 | 1 | 2  | 1 | 1 | 5 | 3 | 3 | 3 | 3 |   |
| PSY | 6 | 5 | 5 | 5 | 7 | 2 | 7 | 5 | 7 | 7 | 6 | 6 | 7 | 1 | 6 | 6 | 7 | 1 | 1 | 1 | 1 | 2  | 1 | 2 | 6 | 3 | 2 | 3 | 2 |   |
| PSY | 3 | 4 | 3 | 3 | 4 | 4 | 4 | 4 | 4 | 5 | 5 | 4 | 7 | 1 | 2 | 5 | 5 | 1 | 1 | 1 | 5 | 1  | 1 | 5 | 1 | 5 | 2 | 5 | 2 | 5 |
| PSY | 2 | 2 | 4 | 5 | 2 | 2 | 5 | 6 | 6 | 7 | 7 | 6 | 7 | 1 | 5 | 7 | 5 | 1 | 1 | 1 | 4 | 1  | 2 | 2 | 1 | 5 | 4 | 1 | 4 | 1 |
| PSY | 2 | 2 | 4 | 6 | 2 | 2 | 5 | 6 | 6 | 6 | 6 | 4 | 7 | 1 | 5 | 6 | 5 | 1 | 1 | 1 | 1 | 2  | 1 | 1 | 5 | 3 | 1 | 3 | 1 |   |
| PSY | 1 | 1 | 7 | 6 | 3 | 2 | 6 | 7 | 7 | 7 | 6 | 7 | 4 | 1 | 5 | 7 | 5 | 1 | 1 | 1 | 1 | 2  | 1 | 2 | 3 | 2 | 3 | 2 |   |   |
| PSY | 2 | 2 | 6 | 6 | 3 | 3 | 5 | 5 | 6 | 7 | 7 | 6 | 6 | 1 | 2 | 4 | 6 | 1 | 2 | 1 | 2 | 2  | 1 | 1 | 5 | 5 | 1 | 5 | 1 |   |
| PSY | 3 | 3 | 6 | 6 | 3 | 3 | 6 | 6 | 6 | 6 | 6 | 6 | 7 | 1 | 5 | 7 | 4 | 1 | 1 | 1 | 1 | 2  | 1 | 1 | 5 | 4 | 3 | 4 | 3 |   |
| PSY | 3 | 4 | 6 | 6 | 4 | 3 | 6 | 6 | 6 | 7 | 5 | 5 | 7 | 1 | 3 | 7 | 5 | 1 | 1 | 1 | 1 | 2  | 1 | 1 | 5 | 2 | 3 | 2 | 3 |   |
| PSY | 4 | 4 | 5 | 4 | 4 | 4 | 5 | 4 | 6 | 6 | 6 | 6 | 8 | 3 | 3 | 4 | 5 | 1 | 1 | 1 | 1 | 2  | 1 | 1 | 2 | 7 | 5 | 7 | 5 |   |
| PSY | 3 | 3 | 6 | 5 | 5 | 5 | 6 | 6 | 7 | 7 | 4 | 3 | 9 | 1 | 3 | 2 | 6 | 1 | 1 | 1 | 1 | 2  | 1 | 1 | 3 | 1 | 8 | 1 | 8 |   |
| PSY | 4 | 4 | 1 | 2 | 4 | 4 | 1 | 4 | 3 | 5 | 3 | 3 | 8 | 1 | 5 | 4 | 5 | 1 | 3 | 1 | 3 | 1  | 2 | 5 | 1 | 5 | 5 | 2 | 5 | 2 |
| PSY | 1 | 4 | 5 | 6 | 3 | 6 | 4 | 2 | 4 | 5 | 7 | 5 | 8 | 1 | 6 | 6 | 3 | 1 | 1 | 1 | 1 | 2  | 2 | 2 | 3 | 2 | 4 | 2 | 4 |   |
| PSY | 3 | 2 | 6 | 6 | 4 | 4 | 4 | 4 | 7 | 7 | 7 | 7 | 7 | 1 | 4 | 5 | 7 | 1 | 1 | 1 | 1 | 1  | 1 | 1 | 5 | 1 | 5 | 1 | 5 |   |
| PSY | 3 | 4 | 2 | 5 | 3 | 2 | 1 | 5 | 5 | 5 | 5 | 3 | 7 | 1 | 1 | 5 | 5 | 1 | 1 | 1 | 1 | 2  | 2 | 1 | 5 | 1 | 3 | 1 | 3 |   |
| PSY | 3 | 2 | 5 | 6 | 6 | 5 | 4 | 3 | 5 | 6 | 5 | 3 | 7 | 1 | 2 | 2 | 7 | 1 | 1 | 1 | 1 | 1  | 1 | 2 | 7 | 5 | 2 | 5 | 2 |   |
| PSY | 5 | 5 | 2 | 5 | 4 | 4 | 4 | 4 | 4 | 7 | 4 | 2 | 7 | 1 | 1 | 7 | 4 | 1 | 1 | 1 | 1 | 2  | 1 | 1 | 5 | 4 | 4 | 4 | 4 |   |

|     |   |   |   |   |   |   |   |   |   |   |   |   |   |   |   |   |   |   |    |   |   |    |   |   |   |   |   |   |   |   |
|-----|---|---|---|---|---|---|---|---|---|---|---|---|---|---|---|---|---|---|----|---|---|----|---|---|---|---|---|---|---|---|
| PSY | 3 | 5 | 1 | 2 | 5 | 2 | 2 | 2 | 4 | 5 | 4 | 3 | 7 | 1 | 3 | 6 | 6 | 1 | 1  | 1 | 5 | 1  | 2 | 5 | 2 | 5 | 3 | 5 | 3 | 5 |
| PSY | 3 | 3 | 6 | 6 | 5 | 5 | 2 | 5 | 6 | 7 | 3 | 3 | 5 | 1 | 5 | 6 | 5 | 1 | 1  | 1 | 1 |    | 2 | 2 | 1 | 2 | 6 | 1 | 6 | 1 |
| PSY | 2 | 3 | 3 | 6 | 5 | 4 | 2 | 7 | 4 | 7 | 7 | 4 | 6 | 1 | 4 | 4 | 7 | 1 | 1  | 1 | 5 | 1  | 2 | 3 | 1 | 5 | 3 | 3 | 3 | 3 |
| PSY | 2 | 3 | 6 | 7 | 1 | 2 | 7 | 6 | 7 | 5 | 7 | 7 | 7 | 1 | 1 | 4 | 6 | 1 | 1  | 1 | 1 |    | 1 | 1 | 1 | 5 | 3 | 3 | 3 | 3 |
| PSY | 3 | 4 | 5 | 6 | 2 | 2 | 5 | 5 | 7 | 7 | 4 | 4 | 5 | 1 | 4 | 5 | 5 | 1 | 1  | 1 | 1 |    | 2 | 1 | 1 | 5 | 3 | 2 | 3 | 2 |
| PSY | 1 | 1 | 7 | 7 | 1 | 1 | 6 | 7 | 7 | 7 | 5 | 4 | 7 | 1 | 2 | 3 | 6 | 1 | 1  | 1 | 1 |    | 2 | 1 | 1 | 3 | 2 | 4 | 2 | 4 |
| PSY | 3 | 4 | 4 | 4 | 4 | 4 | 4 | 4 | 7 | 7 | 7 | 5 | 5 | 1 | 3 | 4 | 5 | 1 | 1  | 1 | 3 | 1  | 2 | 4 | 1 | 5 | 4 | 5 | 4 | 5 |
| PSY | 5 | 5 | 5 | 5 | 3 | 4 | 4 | 7 | 6 | 7 | 6 | 6 | 8 | 3 | 2 | 5 | 4 | 1 | 2  | 1 | 1 |    | 2 | 1 | 1 | 2 | 5 | 1 | 5 | 1 |
| PSY | 2 | 2 | 5 | 5 | 2 | 2 | 5 | 5 | 5 | 4 | 4 | 4 | 4 | 2 | 2 | 2 | 6 | 1 | 1  | 1 | 1 |    | 1 | 1 | 1 | 2 | 4 | 1 | 4 | 1 |
| PSY | 6 | 6 | 4 | 4 | 6 | 6 | 6 | 4 | 7 | 7 | 4 | 4 | 7 | 1 | 1 | 5 | 6 | 1 | 1  | 2 | 1 |    | 1 | 2 | 1 | 5 | 7 | 2 | 7 | 2 |
| PSY | 2 | 2 | 4 | 5 | 2 | 3 | 4 | 6 | 7 | 7 | 5 | 6 | 7 | 1 | 2 | 4 | 4 | 1 | 1  | 1 | 1 |    | 2 | 1 | 2 | 5 | 1 | 4 | 1 | 4 |
| PSY | 1 | 1 | 6 | 5 | 2 | 2 | 5 | 6 | 6 | 6 | 3 | 2 | 7 | 1 | 2 | 4 | 6 | 1 | 1  | 1 | 1 |    | 2 | 1 | 1 | 5 | 4 | 1 | 4 | 1 |
| PSY | 1 | 1 | 7 | 7 | 1 | 2 | 6 | 5 | 5 | 6 | 2 | 4 | 6 | 1 | 2 | 2 | 5 | 1 | 1  | 1 | 1 |    | 2 | 1 | 1 | 5 | 3 | 2 | 3 | 2 |
| PSY | 2 | 2 | 2 | 6 | 3 | 3 | 3 | 6 | 6 | 6 | 6 | 6 | 6 | 1 | 1 | 1 | 7 | 1 | 1  | 1 | 1 |    | 2 | 1 | 1 | 5 | 3 | 4 | 3 | 4 |
| PSY | 1 | 1 | 7 | 5 | 1 | 1 | 7 | 5 | 6 | 6 | 3 | 7 | 6 | 1 | 2 | 5 | 6 | 1 | 1  | 1 | 1 |    | 1 | 1 | 1 | 5 | 4 | 3 | 4 | 3 |
| PSY | 2 | 1 | 2 | 5 | 4 | 2 | 2 | 5 | 6 | 7 | 6 | 4 | 6 | 1 | 1 | 7 | 7 | 1 | 1  | 1 | 1 |    | 1 | 1 | 1 | 5 | 5 | 2 | 5 | 2 |
| PSY | 3 | 3 | 5 | 5 | 5 | 3 | 3 | 5 | 7 | 7 | 5 | 5 | 7 | 2 | 2 | 2 | 6 | 1 | 1  | 1 | 1 |    | 1 | 1 | 1 | 5 | 1 | 8 | 1 | 8 |
| PSY | 4 | 4 | 5 | 6 | 4 | 5 | 4 | 5 | 7 | 7 | 4 | 4 | 8 | 1 | 3 | 6 | 5 | 1 | 1  | 1 | 1 |    | 2 | 1 | 1 | 2 | 2 | 3 | 2 | 3 |
| PSY | 2 | 3 | 3 | 4 | 4 | 4 | 3 | 2 | 7 | 7 | 7 | 5 | 7 | 1 | 2 | 4 | 6 | 1 | 1  | 1 | 1 |    | 2 | 2 | 1 | 5 | 1 | 5 | 1 | 5 |
| PSY | 3 | 4 | 6 | 7 | 3 | 3 | 5 | 6 | 5 | 5 | 2 | 2 | 7 | 1 | 6 | 6 | 4 | 1 | 1  | 1 | 1 |    | 2 | 1 | 1 | 5 | 5 | 3 | 5 | 3 |
| PSY | 3 | 3 | 7 | 7 | 2 | 5 | 5 | 6 | 7 | 7 | 7 | 5 | 6 | 1 | 1 | 5 | 7 | 1 | 1  | 1 | 1 |    | 2 | 1 | 1 | 5 | 8 | 1 | 8 | 1 |
| PSY | 4 | 4 | 4 | 5 | 4 | 4 | 4 | 4 | 6 | 6 | 5 | 4 | 7 | 1 | 3 | 5 | 5 | 2 | DK | 1 | 5 |    | 2 | 5 | 1 | 5 | 6 | 3 | 6 | 3 |
| PSY | 4 | 4 | 2 | 3 | 4 | 3 | 4 | 6 | 6 | 7 | 7 | 7 | 9 | 1 | 2 | 1 | 7 | 1 | 1  | 1 | 1 |    | 2 | 1 | 1 | 5 | 5 | 1 | 5 | 1 |
| PSY | 4 | 5 | 5 | 4 | 6 | 6 | 2 | 4 | 6 | 6 | 4 | 4 | 7 | 1 | 3 | 5 | 5 | 1 | 1  | 1 | 1 |    | 2 | 1 | 1 | 5 | 5 | 2 | 5 | 2 |
| PSY | 2 | 2 | 4 | 6 | 2 | 5 | 1 | 6 | 5 | 6 | 6 | 7 | 7 | 1 | 2 | 4 | 5 | 1 | 2  | 1 | 1 |    | 2 | 1 | 1 | 5 | 2 | 6 | 2 | 6 |
| PSY | 3 | 5 | 3 | 5 | 4 | 5 | 3 | 5 | 5 | 6 | 4 | 4 | 6 | 1 | 1 | 3 | 6 | 1 | 2  | 1 | 1 |    | 2 | 1 | 1 | 5 | 3 | 2 | 3 | 2 |
| PSY | 2 | 1 | 7 | 7 | 2 | 2 | 7 | 7 | 6 | 7 | 6 | 5 | 7 | 1 | 1 | 7 | 7 | 1 | 1  | 1 | 1 |    | 2 | 1 | 1 | 5 | 6 | 1 | 6 | 1 |
| PSY | 5 | 5 | 2 | 3 | 5 | 4 | 3 | 5 | 7 | 7 | 7 | 7 | 6 | 1 | 2 | 5 | 6 | 1 | 1  | 1 | 1 |    | 2 | 1 | 1 | 3 | 5 | 1 | 5 | 1 |
| PSY | 5 | 5 | 2 | 4 | 5 | 5 | 1 | 4 | 7 | 7 | 7 | 7 | 8 | 1 | 7 | 6 | 7 | 1 | 2  | 1 | 1 |    | 2 | 2 | 1 | 2 | 4 | 4 | 4 | 4 |
| PSY | 2 | 2 | 5 | 7 | 4 | 4 | 4 | 4 | 6 | 7 | 6 | 5 | 6 | 1 | 1 | 2 | 7 | 1 | 2  | 1 | 5 | DK | 1 | 4 | 1 | 5 | 2 | 5 | 2 | 5 |
| PSY | 3 | 4 | 3 | 3 | 4 | 3 | 6 | 6 | 7 | 7 | 5 | 5 | 7 | 1 | 4 | 2 | 7 | 1 | 2  | 1 | 1 |    | 2 | 1 | 1 | 5 | 6 | 2 | 6 | 2 |
| PSY | 5 | 5 | 2 | 3 | 5 | 5 | 3 | 4 | 7 | 7 | 6 | 5 | 6 | 1 | 6 | 6 | 4 | 1 | 2  | 1 | 2 |    | 2 | 2 | 1 | 5 | 1 | 5 | 1 | 5 |

|     |   |   |   |   |   |   |   |   |   |   |   |   |   |   |   |   |   |   |   |   |   |    |   |   |   |   |   |   |    |    |
|-----|---|---|---|---|---|---|---|---|---|---|---|---|---|---|---|---|---|---|---|---|---|----|---|---|---|---|---|---|----|----|
| PSY | 5 | 6 | 5 | 4 | 6 | 5 | 2 | 6 | 6 | 6 | 6 | 6 | 6 | 1 | 1 | 6 | 5 | 1 | 3 | 1 | 1 | 2  | 1 | 1 | 5 | 5 | 2 | 5 | 2  |    |
| PSY | 5 | 5 | 3 | 3 | 5 | 5 | 2 | 2 | 5 | 6 | 5 | 5 | 8 | 1 | 5 | 6 | 5 | 1 | 1 | 1 | 1 | 1  | 2 | 1 | 1 | 5 | 4 | 2 | 4  | 2  |
| PSY | 4 | 5 | 4 | 6 | 5 | 4 | 6 | 5 | 6 | 7 | 6 | 4 | 7 | 2 | 4 | 5 | 6 | 1 | 1 | 2 | 1 | 2  | 1 | 1 | 5 | 3 | 5 | 3 | 5  |    |
| PSY | 4 | 4 | 5 | 6 | 4 | 3 | 5 | 5 | 7 | 7 | 6 | 7 | 7 | 1 | 2 | 3 | 5 | 1 | 3 | 1 | 1 | 2  | 1 | 1 | 5 | 1 | 5 | 1 | 5  |    |
| PSY | 3 | 4 | 2 | 6 | 5 | 5 | 4 | 3 | 6 | 7 | 3 | 3 | 7 | 1 | 5 | 6 | 4 | 1 | 1 | 1 | 1 | 2  | 1 | 1 | 5 | 2 | 6 | 2 | 6  |    |
| PSY | 5 | 5 | 2 | 2 | 5 | 5 | 2 | 4 | 7 | 7 | 6 | 4 | 6 | 1 | 2 | 6 | 5 | 1 | 1 | 1 | 5 | 1  | 1 | 4 | 1 | 5 | 4 | 3 | 4  | 3  |
| PSY | 5 | 6 | 2 | 3 | 5 | 5 | 3 | 3 | 7 | 6 | 7 | 6 | 7 | 1 | 2 | 5 | 7 | 1 | 2 | 1 | 5 | 1  | 2 | 4 | 2 | 5 | 5 | 2 | 5  | 2  |
| PSY | 5 | 5 | 1 | 1 | 5 | 5 | 1 | 1 | 7 | 6 | 2 | 4 | 4 | 4 | 4 | 3 | 3 | 1 | 2 | 1 | 5 | 1  | 1 | 6 | 1 | 5 | 2 | 8 | 2  | 8  |
| PSY | 4 | 4 | 6 | 3 | 4 | 4 | 6 | 6 | 6 | 7 | 4 | 5 | 7 | 2 | 1 | 3 | 7 | 1 | 2 | 1 | 1 | 2  | 1 | 1 | 5 | 1 | 4 | 1 | 4  |    |
| PSY | 1 | 1 | 4 | 5 | 1 | 1 | 4 | 5 | 7 | 7 | 7 | 7 | 7 | 1 | 2 | 4 | 6 | 1 | 1 | 1 | 6 | EM | 2 | 6 | 1 | 5 | 1 | 4 | EM | EM |
| PSY | 3 | 4 | 7 | 6 | 3 | 2 | 7 | 7 | 6 | 6 | 7 | 7 | 5 | 1 | 1 | 4 | 7 | 1 | 1 | 1 | 1 | 2  | 1 | 1 | 5 | 1 | 6 | 1 | 6  |    |
| PSY | 6 | 5 | 3 | 4 | 4 | 4 | 4 | 4 | 6 | 6 | 6 | 6 | 4 | 2 | 4 | 6 | 4 | 1 | 1 | 1 | 1 | 2  | 1 | 1 | 6 | 5 | 2 | 5 | 2  |    |
| PSY | 5 | 4 | 6 | 5 | 7 | 6 | 3 | 3 | 6 | 7 | 5 | 5 | 7 | 1 | 1 | 6 | 7 | 1 | 2 | 1 | 5 | DK | 1 | 4 | 1 | 5 | 5 | 1 | 5  | 1  |
| PSY | 3 | 3 | 5 | 5 | 2 | 3 | 6 | 7 | 6 | 6 | 4 | 2 | 4 | 2 | 4 | 7 | 5 | 1 | 2 | 1 | 1 | 2  | 2 | 1 | 5 | 7 | 1 | 7 | 1  |    |
| PSY | 5 | 6 | 5 | 6 | 5 | 6 | 3 | 6 | 6 | 6 | 6 | 6 | 7 | 1 | 4 | 6 | 6 | 1 | 1 | 1 | 1 | 2  | 1 | 1 | 5 | 1 | 8 | 1 | 8  |    |
| PSY | 2 | 4 | 5 | 6 | 4 | 4 | 2 | 6 | 6 | 6 | 4 | 6 | 8 | 1 | 4 | 5 | 5 | 1 | 1 | 1 | 1 | 2  | 1 | 1 | 5 | 2 | 4 | 2 | 4  |    |
| PSY | 1 | 2 | 3 | 4 | 1 | 3 | 5 | 4 | 6 | 6 | 4 | 2 | 8 | 1 | 4 | 4 | 5 | 1 | 1 | 1 | 5 | 2  | 1 | 4 | 1 | 3 | 6 | 2 | 6  | 2  |
| PSY | 1 | 1 | 7 | 7 | 2 | 2 | 7 | 6 | 4 | 7 | 1 | 1 | 5 | 7 | 4 | 7 | 7 | 2 | 2 | 1 | 4 | 2  | 1 | 1 | 5 | 4 | 3 | 4 | 3  |    |
| PSY | 4 | 2 | 5 | 5 | 3 | 3 | 4 | 4 | 5 | 7 | 4 | 5 | 8 | 3 | 3 | 4 | 6 | 1 | 2 | 2 | 1 | 2  | 1 | 1 | 5 | 7 | 1 | 7 | 1  |    |
| PSY | 3 | 3 | 5 | 5 | 2 | 2 | 6 | 6 | 6 | 5 | 3 | 3 | 7 | 1 | 2 | 6 | 6 | 1 | 1 | 2 | 5 | 4  | 1 | 5 | 1 | 5 | 5 | 3 | 5  | 3  |
| PSY | 5 | 4 | 4 | 5 | 2 | 3 | 4 | 4 | 6 | 7 | 6 | 5 | 8 | 1 | 3 | 2 | 6 | 1 | 2 | 2 | 1 | 2  | 3 | 1 | 5 | 1 | 3 | 1 | 3  |    |
| PSY | 3 | 5 | 5 | 6 | 2 | 2 | 5 | 6 | 6 | 7 | 7 | 5 | 6 | 1 | 6 | 6 | 6 | 1 | 1 | 2 | 1 | 2  | 1 | 1 | 2 | 2 | 6 | 2 | 6  |    |
| PSY | 3 | 5 | 5 | 6 | 3 | 2 | 6 | 7 | 7 | 7 | 3 | 2 | 8 | 1 | 1 | 6 | 7 | 1 | 1 | 2 | 1 | 2  | 1 | 1 | 5 | 5 | 1 | 5 | 1  |    |
| PSY | 3 | 4 | 2 | 6 | 4 | 5 | 3 | 7 | 4 | 4 | 6 | 6 | 5 | 1 | 2 | 7 | 3 | 1 | 1 | 2 | 5 | 1  | 2 | 2 | 1 | 7 | 2 | 4 | 2  | 4  |
| SOC | 5 | 5 | 6 | 6 | 7 | 7 | 2 | 3 | 7 | 7 | 5 | 5 | 5 | 1 | 3 | 6 | 6 | 1 | 1 | 2 | 1 | 2  | 2 | 1 | 6 | 4 | 2 | 4 | 2  |    |
| SOC | 4 | 3 | 5 | 5 | 3 | 4 | 4 | 4 | 7 | 7 | 7 | 6 | 6 | 1 | 1 | 3 | 6 | 1 | 1 | 2 | 1 | 2  | 1 | 1 | 2 | 2 | 5 | 2 | 5  | 2  |
| SOC | 5 | 4 | 2 | 5 | 2 | 6 | 2 | 3 | 6 | 7 | 6 | 6 | 7 | 1 | 2 | 7 | 6 | 1 | 1 | 2 | 1 | 2  | 1 | 1 | 5 | 6 | 4 | 6 | 4  |    |
| SOC | 1 | 1 | 7 | 1 | 5 | 7 | 1 | 1 | 7 | 7 | 6 | 5 | 6 | 1 | 4 | 7 | 7 | 1 | 1 | 2 | 1 | 2  | 1 | 1 | 1 | 1 | 5 | 1 | 5  |    |
| SOC | 6 | 6 | 2 | 5 | 6 | 6 | 5 | 5 | 7 | 7 | 5 | 6 | 8 | 2 | 5 | 4 | 7 | 1 | 1 | 2 | 1 | 2  | 1 | 1 | 2 | 6 | 1 | 6 | 1  |    |
| SOC | 5 | 6 | 1 | 1 | 5 | 6 | 1 | 2 | 6 | 7 | 5 | 3 | 6 | 1 | 1 | 2 | 7 | 1 | 1 | 2 | 5 | 1  | 2 | 5 | 1 | 5 | 5 | 2 | 5  | 2  |
| SOC | 2 | 2 | 6 | 6 | 1 | 1 | 4 | 6 | 6 | 6 | 2 | 2 | 7 | 1 | 3 | 5 | 5 | 1 | 1 | 2 | 1 | 2  | 1 | 1 | 2 | 3 | 3 | 3 | 3  |    |
| SOC | 6 | 4 | 6 | 6 | 4 | 6 | 4 | 6 | 6 | 6 | 6 | 6 | 6 | 1 | 2 | 6 | 4 | 1 | 1 | 2 | 1 | 2  | 1 | 1 | 5 | 1 | 5 | 1 | 5  |    |

|     |   |   |   |   |   |   |   |   |   |   |   |   |   |   |   |   |   |   |   |   |   |    |   |   |   |   |   |   |    |    |
|-----|---|---|---|---|---|---|---|---|---|---|---|---|---|---|---|---|---|---|---|---|---|----|---|---|---|---|---|---|----|----|
| SOC | 3 | 6 | 4 | 4 | 1 | 5 | 6 | 5 | 6 | 6 | 4 | 4 | 6 | 1 | 1 | 5 | 3 | 1 | 1 | 2 | 1 | 2  | 1 | 2 | 5 | 5 | 3 | 5 | 3  |    |
| SOC | 4 | 5 | 2 | 4 | 4 | 3 | 5 | 5 | 4 | 6 | 3 | 3 | 7 | 1 | 1 | 4 | 7 | 1 | 1 | 2 | 5 | 2  | 1 | 6 | 1 | 5 | 4 | 1 | 4  | 1  |
| SOC | 2 | 1 | 6 | 6 | 6 | 3 | 4 | 6 | 6 | 7 | 2 | 2 | 6 | 1 | 2 | 5 | 5 | 1 | 1 | 2 | 1 | 2  | 1 | 1 | 5 | 3 | 5 | 3 | 5  |    |
| SOC | 5 | 6 | 4 | 4 | 3 | 6 | 2 | 5 | 5 | 5 | 3 | 2 | 7 | 1 | 4 | 2 | 6 | 1 | 1 | 2 | 2 | 2  | 2 | 1 | 5 | 4 | 4 | 4 | 4  |    |
| SOC | 6 | 2 | 2 | 6 | 2 | 2 | 5 | 6 | 7 | 6 | 5 | 2 | 7 | 1 | 5 | 6 | 6 | 1 | 1 | 2 | 1 | 1  | 2 | 1 | 3 | 5 | 3 | 5 | 3  |    |
| SOC | 2 | 6 | 6 | 2 | 2 | 2 | 6 | 6 | 7 | 6 | 6 | 2 | 4 | 1 | 1 | 7 | 7 | 1 | 1 | 2 | 1 | 1  | 1 | 5 | 2 | 5 | 2 | 5 |    |    |
| SOC | 3 | 4 | 3 | 5 | 3 | 4 | 3 | 5 | 6 | 7 | 5 | 4 | 6 | 1 | 2 | 5 | 5 | 1 | 2 | 2 | 1 | 2  | 1 | 1 | 5 | 3 | 4 | 3 | 4  |    |
| SOC | 1 | 3 | 1 | 3 | 1 | 1 | 1 | 3 | 7 | 7 | 5 | 2 | 7 | 1 | 1 | 1 | 7 | 1 | 2 | 2 | 5 | 1  | 1 | 5 | 1 | 5 | 3 | 3 | 3  | 3  |
| SOC | 2 | 2 | 6 | 7 | 2 | 3 | 5 | 5 | 7 | 7 | 5 | 5 | 7 | 1 | 2 | 4 | 7 | 1 | 2 | 2 | 1 | 2  | 1 | 1 | 5 | 2 | 3 | 2 | 3  |    |
| SOC | 1 | 1 | 3 | 5 | 2 | 2 | 5 | 4 | 7 | 7 | 4 | 4 | 7 | 1 | 5 | 7 | 6 | 1 | 2 | 2 | 1 | 2  | 2 | 1 | 5 | 1 | 4 | 1 | 4  |    |
| SOC | 6 | 6 | 2 | 2 | 5 | 5 | 2 | 2 | 6 | 7 | 4 | 4 | 7 | 2 | 1 | 1 | 7 | 1 | 4 | 2 | 5 | 2  | 1 | 4 | 1 | 5 | 3 | 3 | 3  | 3  |
| SOC | 3 | 3 | 5 | 5 | 6 | 6 | 4 | 4 | 7 | 7 | 3 | 3 | 7 | 1 | 1 | 4 | 7 | 1 | 2 | 2 | 1 | 1  | 2 | 1 | 5 | 1 | 5 | 1 | 5  |    |
| SOC | 2 | 5 | 3 | 5 | 6 | 7 | 2 | 2 | 6 | 6 | 3 | 2 | 7 | 1 | 2 | 2 | 7 | 1 | 3 | 2 | 5 | 1  | 1 | 3 | 1 | 5 | 1 | 4 | 1  | 4  |
| SOC | 3 | 5 | 1 | 3 | 2 | 2 | 2 | 7 | 6 | 7 | 3 | 2 | 6 | 1 | 2 | 5 | 6 | 1 | 1 | 2 | 1 | 2  | 1 | 1 | 5 | 3 | 3 | 3 | 3  |    |
| SOC | 1 | 1 | 6 | 6 | 1 | 1 | 6 | 6 | 3 | 7 | 6 | 3 | 6 | 1 | 1 | 5 | 7 | 1 | 1 | 2 | 4 | 2  | 2 | 2 | 1 | 5 | 3 | 3 | 3  | 3  |
| SOC | 3 | 2 | 4 | 5 | 4 | 4 | 3 | 5 | 6 | 7 | 4 | 5 | 6 | 1 | 5 | 6 | 4 | 1 | 1 | 2 | 5 | 1  | 2 | 5 | 1 | 5 | 5 | 2 | 5  | 2  |
| SOC | 2 | 2 | 6 | 7 | 1 | 2 | 6 | 6 | 5 | 6 | 3 | 2 | 7 | 1 | 2 | 7 | 5 | 1 | 2 | 2 | 1 | 2  | 2 | 1 | 5 | 1 | 6 | 1 | 6  |    |
| SOC | 2 | 2 | 7 | 4 | 3 | 4 | 5 | 5 | 5 | 7 | 5 | 5 | 6 | 2 | 1 | 4 | 5 | 1 | 2 | 2 | 3 | 7  | 1 | 3 | 1 | 5 | 2 | 5 | 2  | 5  |
| SOC | 3 | 3 | 6 | 6 | 1 | 1 | 5 | 5 | 6 | 7 | 6 | 3 | 6 | 1 | 4 | 7 | 7 | 1 | 1 | 1 | 2 | 2  | 2 | 1 | 5 | 4 | 2 | 4 | 2  |    |
| SOC | 6 | 6 | 2 | 4 | 6 | 6 | 2 | 4 | 7 | 7 | 6 | 6 | 5 | 1 | 2 | 4 | 5 | 1 | 1 | 1 | 6 | EM | 1 | 6 | 1 | 5 | 1 | 2 | EM | EM |
| SOC | 6 | 4 | 2 | 4 |   |   |   |   | 7 | 4 | 4 | 3 | 7 | 1 | 5 | 7 | 5 | 1 | 1 | 1 | 3 | 2  | 4 | 1 | 5 | 3 | 4 | 3 | 4  |    |
| SOC | 6 | 6 | 1 | 5 | 4 | 5 | 3 | 4 | 5 | 6 | 3 | 2 | 8 | 1 | 1 | 7 | 7 | 1 | 1 | 1 | 1 | 2  | 2 | 1 | 5 | 4 | 1 | 4 | 1  |    |
| SOC | 7 | 3 | 3 | 5 | 5 | 5 | 1 | 2 | 7 | 7 | 3 | 1 | 4 | 1 | 1 | 5 | 7 | 1 | 1 | 2 | 2 | 2  | 2 | 1 | 5 | 5 | 2 | 5 | 2  |    |
| SOC | 2 | 5 | 2 | 5 | 3 | 3 | 2 | 5 | 7 | 7 | 2 | 2 | 8 | 3 | 3 | 6 | 7 | 1 | 1 | 2 | 2 | 2  | 2 | 1 | 5 | 4 | 3 | 4 | 3  |    |
| SOC | 2 | 2 | 4 | 4 | 2 | 2 | 2 | 2 | 7 | 7 | 3 | 2 | 7 | 1 | 1 | 4 | 6 | 1 | 1 | 1 | 1 | 2  | 2 | 1 | 2 | 3 | 2 | 3 | 2  |    |
| SOC | 4 | 4 | 3 | 5 | 4 | 4 | 4 | 4 | 7 | 7 | 5 | 5 | 7 | 1 | 1 | 7 | 3 | 1 | 1 | 2 | 5 | 1  | 2 | 3 | 1 | 5 | 3 | 5 | 3  | 5  |
| SOC | 4 | 5 | 4 | 4 | 2 | 5 | 1 | 3 | 7 | 7 | 2 | 2 | 7 | 1 | 1 | 6 | 4 | 1 | 1 | 1 | 1 | 2  | 1 | 1 | 1 | 7 | 2 | 4 | 2  | 4  |
| SOC | 1 | 1 | 6 | 7 | 1 | 1 | 7 | 7 | 7 | 5 | 5 | 4 | 7 | 1 | 2 | 6 | 5 | 1 | 1 | 1 | 1 | 1  | 1 | 2 | 1 | 5 | 1 | 4 | 1  | 4  |
| SOC | 3 | 3 | 5 | 6 | 5 | 4 | 4 | 5 | 5 | 7 | 3 | 1 | 7 | 1 | 2 | 2 | 7 | 1 | 1 | 1 | 1 | 2  | 1 | 1 | 5 | 5 | 2 | 5 | 2  |    |
| SOC | 3 | 3 | 1 | 2 | 3 | 3 | 2 | 3 | 7 | 7 | 3 | 3 | 7 | 1 | 1 | 5 | 5 | 1 | 1 | 1 | 1 | 2  | 1 | 1 | 5 | 5 | 2 | 5 | 2  |    |
| SOC | 2 | 5 | 5 | 3 | 5 | 5 | 3 | 4 | 6 | 7 | 3 | 5 | 7 | 1 | 4 | 5 | 5 | 1 | 1 | 1 | 1 | 2  | 1 | 1 | 5 | 1 | 3 | 1 | 3  |    |
| SOC | 2 | 5 | 3 | 3 | 4 | 5 | 1 | 2 | 6 | 7 | 5 | 3 | 7 | 1 | 4 | 7 | 5 | 1 | 1 | 1 | 5 | 3  | 1 | 3 | 1 | 3 | 5 | 4 | 5  | 4  |

|     |   |   |   |   |   |   |   |   |   |   |   |   |   |   |   |   |   |   |   |   |    |    |   |   |   |   |   |   |   |   |
|-----|---|---|---|---|---|---|---|---|---|---|---|---|---|---|---|---|---|---|---|---|----|----|---|---|---|---|---|---|---|---|
| SOC | 6 | 4 | 5 | 6 | 5 | 3 | 4 | 5 | 5 | 7 | 6 | 5 | 5 | 5 | 4 | 5 | 6 | 1 | 1 | 1 | 1  | 2  | 2 | 1 | 5 | 2 | 4 | 2 | 4 |   |
| SOC | 5 | 6 | 3 | 5 | 6 | 4 | 2 | 6 | 6 | 6 | 4 | 2 | 7 | 1 | 4 | 6 | 4 | 1 | 1 | 1 | 1  | 2  | 3 | 1 | 5 | 2 | 3 | 2 | 3 |   |
| SOC | 3 | 3 | 2 | 2 | 4 | 4 | 4 | 4 | 6 | 7 | 3 | 5 | 7 | 1 | 4 | 2 | 4 | 1 | 1 | 1 | 1  | 2  | 1 | 1 | 5 | 1 | 3 | 1 | 3 |   |
| SOC | 1 | 1 | 5 | 6 | 2 | 3 | 4 | 6 | 2 | 4 | 2 | 2 | 4 | 1 | 1 | 6 | 5 | 1 | 1 | 2 | 5  | 1  | 1 | 4 | 1 | 5 | 4 | 2 | 4 | 2 |
| SOC | 1 | 4 | 6 | 7 | 2 | 2 | 6 | 6 | 6 | 7 | 3 | 3 | 7 | 1 | 3 | 6 | 5 | 1 | 3 | 1 | 4  | 3  | 2 | 2 | 1 | 5 | 4 | 3 | 4 | 3 |
| SOC | 5 | 3 | 3 | 4 | 5 | 3 | 3 | 3 | 5 | 6 | 3 | 4 | 6 | 1 | 2 | 6 | 4 | 1 | 1 | 1 | 1  | 2  | 1 | 1 | 5 | 1 | 6 | 1 | 6 |   |
| SOC | 2 | 2 | 5 | 5 | 4 | 4 | 2 | 4 | 7 | 7 | 4 | 4 | 6 | 1 | 1 | 7 | 6 | 1 | 1 | 2 | 1  | 2  | 2 | 1 | 5 | 5 | 2 | 5 | 2 |   |
| SOC | 1 | 1 | 7 | 7 | 1 | 1 | 7 | 7 | 7 | 7 | 1 | 2 | 6 | 1 | 1 | 5 | 5 | 1 | 1 | 2 | 1  | 2  | 3 | 1 | 3 | 1 | 6 | 1 | 6 |   |
| SOC | 3 | 3 | 5 | 5 | 6 | 5 | 3 | 4 | 6 | 6 | 4 | 4 | 7 | 1 | 2 | 7 | 4 | 1 | 1 | 2 | 1  | 2  | 1 | 1 | 5 | 4 | 2 | 4 | 2 |   |
| SOC | 4 | 3 | 3 | 4 | 5 | 5 | 5 | 5 | 7 | 7 | 5 | 4 | 7 | 1 | 2 | 5 | 5 | 1 | 1 | 1 | 1  | 2  | 2 | 1 | 2 | 1 | 6 | 1 | 6 |   |
| SOC | 5 | 2 | 1 | 5 | 5 | 3 | 1 | 5 | 7 | 4 | 5 | 4 | 5 | 4 | 2 | 7 | 6 | 1 | 1 | 2 | 1  | 1  | 1 | 1 | 5 | 2 | 5 | 2 | 5 |   |
| SOC | 5 | 3 | 3 | 6 | 5 | 4 | 3 | 4 | 4 | 6 | 6 | 2 | 7 | 1 | 3 | 6 | 3 | 1 | 1 | 2 | 5  | 1  | 2 | 5 | 1 | 5 | 3 | 4 | 3 | 4 |
| SOC | 2 | 1 | 3 | 1 | 4 | 2 | 4 | 2 | 7 | 7 | 5 | 4 | 5 | 1 | 1 | 5 | 5 | 1 | 2 | 2 | 1  | 1  | 2 | 1 | 5 | 1 | 4 | 1 | 4 |   |
| SOC | 3 | 3 | 1 | 4 | 6 | 6 | 3 | 4 | 7 | 7 | 3 | 3 | 5 | 4 | 6 | 6 | 4 | 1 | 1 | 1 | 1  | 2  | 2 | 2 | 3 | 4 | 2 | 4 | 2 |   |
| SOC | 3 | 3 | 5 | 4 | 2 | 2 | 5 | 5 | 5 | 5 | 2 | 2 | 5 | 1 | 1 | 4 | 5 | 1 | 2 | 2 | 1  | 1  | 1 | 1 | 5 | 2 | 5 | 2 | 5 |   |
| SOC | 5 | 6 | 2 | 3 | 2 | 2 | 4 | 6 | 7 | 7 | 2 | 2 | 7 | 1 | 7 | 7 | 2 | 1 | 1 | 1 | 5  | 1  | 2 | 4 | 1 | 5 | 2 | 7 | 2 | 7 |
| SOC | 2 | 3 | 6 | 6 | 4 | 6 | 4 | 3 | 6 | 6 | 4 | 1 | 7 | 1 | 2 | 5 | 7 | 1 | 1 | 1 | 1  | 1  | 1 | 2 | 1 | 5 | 5 | 1 | 5 | 1 |
| SOC | 6 | 6 | 2 | 5 | 6 | 6 | 2 | 5 | 6 | 7 | 5 | 2 | 7 | 1 | 2 | 6 | 6 | 1 | 1 | 1 | 2  | 2  | 2 | 1 | 5 | 3 | 2 | 3 | 2 |   |
| SOC | 3 | 3 | 4 | 6 | 4 | 4 | 4 | 4 | 7 | 7 | 6 | 6 | 6 | 1 | 1 | 6 | 6 | 1 | 1 | 1 | 1  | 2  | 1 | 1 | 5 | 4 | 3 | 4 | 3 |   |
| SOC | 7 | 1 | 1 | 7 | 3 | 1 | 1 | 4 | 7 | 3 | 7 | 7 | 7 | 1 | 1 | 7 | 3 | 1 | 1 | 4 | PU | 1  | 1 | 2 | 1 | 5 | 4 | 4 | 4 | 4 |
| SOC | 2 | 3 | 2 | 5 | 5 | 4 | 4 | 6 | 6 | 7 | 4 | 4 | 6 | 1 | 6 | 7 | 5 | 1 | 1 | 1 | 1  | 2  | 3 | 1 | 5 | 2 | 5 | 2 | 5 |   |
| SOC | 5 | 4 | 4 | 5 | 5 | 5 | 3 | 3 | 7 | 7 | 6 | 4 | 5 | 1 | 1 | 2 | 6 | 1 | 1 | 1 | 1  | 2  | 1 | 1 | 5 | 3 | 2 | 3 | 2 |   |
| SOC | 4 | 3 | 3 | 5 | 4 | 4 | 4 | 4 | 5 | 5 | 4 | 4 | 6 | 1 | 1 | 7 | 3 | 1 | 1 | 1 | 4  | DK | 1 | 2 | 1 | 5 | 3 | 3 | 3 | 3 |
| SOC | 2 | 3 | 6 | 6 | 1 | 3 | 6 | 6 | 7 | 7 | 5 | 5 | 8 | 1 | 1 | 4 | 7 | 1 | 1 | 1 | 1  | 2  | 2 | 2 | 3 | 4 | 2 | 4 | 2 |   |
| SOC | 2 | 2 | 2 | 3 | 2 | 2 | 2 | 2 | 6 | 5 | 3 | 3 | 6 | 1 | 1 | 5 | 5 | 1 | 1 | 1 | 1  | 1  | 2 | 2 | 6 | 5 | 2 | 5 | 2 |   |
| SOC | 1 | 1 | 1 | 1 | 5 | 5 | 2 | 3 | 7 | 7 | 7 | 4 | 5 | 1 | 1 | 4 | 7 | 1 | 1 | 1 | 2  | 1  | 2 | 1 | 5 | 8 | 1 | 8 | 1 |   |
| SOC | 5 | 5 | 3 | 3 | 6 | 5 | 2 | 2 | 7 | 7 | 4 | 3 | 5 | 1 | 2 | 7 | 5 | 1 | 1 | 1 | 2  | 1  | 2 | 1 | 5 | 4 | 2 | 4 | 2 |   |
| SOC | 2 | 2 | 5 | 7 | 4 | 4 | 3 | 4 | 7 | 6 | 6 | 3 | 5 | 1 | 3 | 6 | 4 | 1 | 2 | 1 | 2  | 2  | 2 | 1 | 3 | 5 | 1 | 5 | 1 |   |
| SOC | 3 | 3 | 5 | 5 | 2 | 6 | 6 | 2 | 6 | 6 | 6 | 6 | 7 | 2 | 2 | 2 | 6 | 1 | 1 | 1 | 1  | 2  | 1 | 1 | 5 | 2 | 2 | 2 | 2 |   |
| SOC | 1 | 1 | 1 | 4 | 4 | 4 | 2 | 3 | 6 | 5 | 4 | 2 | 5 | 1 | 3 | 7 | 3 | 1 | 1 | 1 | 1  | 2  | 2 | 2 | 5 | 1 | 5 | 1 | 5 |   |
| SOC | 5 | 5 | 3 | 3 | 5 | 5 | 3 | 3 | 7 | 7 | 4 | 3 | 6 | 1 | 2 | 5 | 6 | 1 | 1 | 1 | 1  | 2  | 2 | 2 | 7 | 3 | 3 | 3 | 3 |   |
| SOC | 2 | 2 | 5 | 2 | 2 | 5 | 3 | 5 | 6 | 7 | 4 | 5 | 6 | 1 | 1 | 2 | 7 | 1 | 1 | 1 | 1  | 1  | 1 | 1 | 7 | 3 | 3 | 3 | 3 |   |

|     |   |   |   |   |   |   |   |   |   |   |   |   |   |   |   |   |   |   |   |   |   |   |    |   |   |   |   |   |   |   |   |   |
|-----|---|---|---|---|---|---|---|---|---|---|---|---|---|---|---|---|---|---|---|---|---|---|----|---|---|---|---|---|---|---|---|---|
| SOC | 7 | 7 | 1 | 5 | 5 | 6 | 2 | 4 | 7 | 7 | 4 | 2 | 6 | 1 | 1 | 6 | 5 | 1 | 1 | 1 | 1 | 1 | 2  | 1 | 5 | 2 | 6 | 2 | 6 |   |   |   |
| SOC | 6 | 5 | 2 | 4 | 5 | 4 | 3 | 5 | 6 | 7 | 5 | 2 | 6 | 1 | 5 | 6 | 6 | 1 | 1 | 1 | 1 | 1 | 2  | 2 | 1 | 6 | 1 | 5 | 1 | 5 |   |   |
| SOC | 3 | 4 | 4 | 6 | 5 | 4 | 4 | 6 | 6 | 6 | 4 | 4 | 6 | 1 | 1 | 4 | 5 | 1 | 1 | 1 | 1 | 2 | 1  | 2 | 1 | 5 | 6 | 2 | 6 | 2 |   |   |
| SOC | 2 | 2 | 5 | 6 | 2 | 2 | 3 | 4 | 7 | 7 | 4 | 2 | 6 | 1 | 2 | 6 | 6 | 1 | 1 | 1 | 1 | 1 | 1  | 1 | 1 | 6 | 1 | 5 | 1 | 5 |   |   |
| SOC | 1 | 2 | 3 | 1 | 1 | 1 | 3 | 2 | 6 | 6 | 5 | 5 | 4 | 1 | 2 | 6 | 3 | 1 | 1 | 1 | 1 | 1 | 2  | 1 | 1 | 5 | 5 | 4 | 5 | 4 |   |   |
| SOC | 2 | 4 | 2 | 4 | 4 | 4 | 4 | 4 | 6 | 6 | 4 | 2 | 7 | 1 | 4 | 4 | 4 | 1 | 1 | 1 | 1 | 1 | 2  | 2 | 1 | 3 | 3 | 2 | 3 | 2 |   |   |
| SOC | 2 | 2 | 7 | 7 |   |   |   |   | 7 | 7 | 7 | 7 | 6 | 1 | 1 | 7 | 4 | 1 | 1 | 1 | 1 | 1 | 2  | 2 | 1 | 5 | 1 | 7 | 1 | 7 |   |   |
| SOC | 5 | 4 | 3 | 7 | 5 | 6 | 1 | 6 | 5 | 5 | 5 | 4 | 7 | 1 | 1 | 3 | 5 | 1 | 1 | 1 | 1 | 1 | 2  | 1 | 1 | 5 | 2 | 3 | 2 | 3 |   |   |
| SOC | 4 | 5 | 3 | 3 | 4 | 5 | 3 | 5 | 6 | 6 | 4 | 3 | 5 | 1 | 2 | 5 | 3 | 1 | 1 | 1 | 1 | 5 | 2  | 1 | 5 | 1 | 5 | 3 | 2 | 3 | 2 |   |
| SOC | 4 | 5 | 3 | 4 | 4 | 5 | 5 | 4 | 6 | 6 | 4 | 3 | 5 | 1 | 1 | 2 | 5 | 1 | 1 | 1 | 1 | 1 | 1  | 1 | 1 | 5 | 5 | 3 | 5 | 3 |   |   |
| SOC | 5 | 3 | 5 | 6 | 5 | 4 | 3 | 4 | 7 | 7 | 5 | 5 | 5 | 1 | 2 | 3 | 6 | 1 | 1 | 1 | 1 | 1 | 2  | 1 | 1 | 5 | 5 | 2 | 5 | 2 |   |   |
| SOC | 2 | 3 | 4 | 5 | 3 | 2 | 5 | 6 | 7 | 7 | 2 | 2 | 4 | 1 | 1 | 1 | 7 | 1 | 1 | 1 | 1 | 1 | 2  | 1 | 1 | 5 | 4 | 1 | 4 | 1 |   |   |
| SOC | 6 | 6 | 2 | 4 | 3 | 4 | 5 | 7 | 5 | 6 | 3 | 1 | 2 | 1 | 5 | 7 | 3 | 1 | 1 | 1 | 1 | 1 | 2  | 1 | 1 | 5 | 3 | 1 | 3 | 1 |   |   |
| SOC | 1 | 1 | 7 | 7 | 1 | 2 | 7 | 6 | 7 | 7 | 6 | 4 | 6 | 1 | 2 | 5 | 4 | 1 | 1 | 1 | 1 | 1 | 1  | 1 | 1 | 5 | 1 | 5 | 1 | 5 |   |   |
| SOC | 1 | 5 | 1 | 1 | 5 | 3 | 1 | 4 | 4 | 5 | 3 | 3 | 7 | 1 | 6 | 1 | 1 | 1 | 2 | 2 | 1 | 1 | 2  | 1 | 1 | 5 | 3 | 4 | 3 | 4 |   |   |
| SOC | 3 | 3 | 5 | 6 | 5 | 5 | 5 | 3 | 6 | 7 | 7 | 5 | 8 | 1 | 1 | 7 | 5 | 1 | 1 | 1 | 1 | 1 | 2  | 1 | 1 | 5 | 1 | 3 | 1 | 3 |   |   |
| SOC | 4 | 4 | 3 | 5 | 2 | 4 | 5 | 5 | 6 | 7 | 5 | 5 | 8 | 1 | 2 | 5 | 7 | 1 | 1 | 1 | 1 | 5 | 2  | 1 | 5 | 1 | 5 | 3 | 3 | 3 | 3 |   |
| SOC | 5 | 5 | 6 | 6 | 6 | 6 | 5 | 5 | 6 | 7 | 4 | 3 | 5 | 3 | 3 | 4 | 6 | 1 | 1 | 1 | 1 | 1 | 1  | 1 | 1 | 5 | 6 | 3 | 6 | 3 |   |   |
| SOC | 3 | 3 | 1 | 5 | 5 | 5 | 3 | 3 | 6 | 6 | 7 | 4 | 7 | 1 | 1 | 1 | 7 | 1 | 1 | 1 | 1 | 5 | 2  | 1 | 5 |   | 1 | 5 | 1 | 5 |   |   |
| SOC | 4 | 4 | 6 | 4 | 5 | 2 | 4 | 4 | 6 | 7 | 5 | 5 | 7 | 1 | 1 | 5 | 5 | 1 | 1 | 1 | 1 | 1 | 2  | 1 | 2 | 6 | 4 | 3 | 4 | 3 |   |   |
| SOC | 2 | 2 | 5 | 5 | 4 | 4 | 4 | 4 | 7 | 7 | 4 | 4 | 7 | 1 | 2 | 5 | 6 | 1 | 2 | 1 | 1 | 3 | 8  | 2 | 3 | 1 | 5 | 3 | 2 | 3 | 2 |   |
| SOC | 4 | 4 | 1 | 5 | 6 | 4 | 4 | 4 | 7 | 7 | 7 | 5 | 6 | 1 | 5 | 5 | 5 | 1 | 1 | 1 | 1 | 1 | 2  | 1 | 2 | 7 | 4 | 2 | 4 | 2 |   |   |
| SOC | 5 | 6 | 2 | 3 | 5 | 6 | 2 | 2 | 5 | 6 | 3 | 3 | 3 | 1 | 3 | 6 | 6 | 1 | 1 | 1 | 1 | 1 | 1  | 1 | 1 | 5 | 4 | 2 | 4 | 2 |   |   |
| SOC | 2 | 2 | 3 | 5 | 3 | 3 | 2 | 4 | 6 | 7 | 4 | 3 | 7 | 1 | 5 | 6 | 5 | 1 | 1 | 1 | 1 | 5 | 2  | 1 | 5 | 1 | 5 | 4 | 3 | 4 | 3 |   |
| SOC | 5 | 4 | 5 | 6 | 5 | 2 | 5 | 6 | 6 | 7 | 5 | 4 | 6 | 1 | 3 | 5 | 4 | 1 | 1 | 1 | 1 | 1 | 2  | 1 | 1 | 5 | 2 | 2 | 2 | 2 | 2 |   |
| SOC | 1 | 2 | 2 | 5 | 3 | 4 | 5 | 6 | 7 | 7 | 4 | 5 | 5 | 1 | 4 | 7 | 5 | 1 | 1 | 1 | 1 | 3 | 3  | 2 | 2 | 1 | 5 | 4 | 2 | 4 | 2 |   |
| SOC | 1 | 1 | 6 | 7 | 1 | 1 | 7 | 7 | 7 | 7 | 5 | 2 | 4 | 3 | 7 | 5 | 6 | 1 | 2 | 2 | 1 | 1 | 1  | 1 | 1 | 5 | 3 | 3 | 3 | 3 | 3 |   |
| SOC | 2 | 2 | 5 | 5 | 2 | 2 | 5 | 5 | 5 | 5 | 4 | 3 | 7 | 1 | 3 | 5 | 4 | 1 | 1 | 1 | 1 | 4 | 4  | 1 | 2 | 1 | 7 | 3 | 3 | 3 | 3 |   |
| SOC | 3 | 3 | 3 | 3 | 2 | 2 | 5 | 5 | 5 | 5 | 2 | 2 | 6 | 1 | 1 | 6 | 6 | 1 | 1 | 1 | 1 | 1 | 2  | 1 | 1 | 5 | 4 | 2 | 4 | 2 | 2 |   |
| SOC | 2 | 2 | 3 | 5 | 3 | 2 | 4 | 5 | 6 | 7 | 5 | 2 | 7 | 1 | 1 | 5 | 5 | 1 | 1 | 1 | 1 | 4 | DK | 2 | 2 | 1 | 5 | 4 | 2 | 4 | 2 | 2 |
| SOC | 3 | 3 | 3 | 4 | 3 | 4 | 2 | 2 | 7 | 7 | 6 | 2 | 6 | 1 | 1 | 4 | 7 | 1 | 2 | 2 | 1 | 5 | DK | 2 | 5 | 1 | 5 | 5 | 2 | 5 | 2 | 2 |
| SOC | 5 | 5 | 4 | 5 | 5 | 6 | 4 | 4 | 6 | 6 | 4 | 2 | 4 | 1 | 3 | 5 | 6 | 1 | 1 | 1 | 1 | 1 | 1  | 2 | 1 | 5 | 4 | 2 | 4 | 2 | 2 |   |



|     |   |   |   |   |   |   |   |   |   |   |   |   |   |   |   |   |   |   |    |   |   |   |   |   |   |   |   |   |   |   |   |
|-----|---|---|---|---|---|---|---|---|---|---|---|---|---|---|---|---|---|---|----|---|---|---|---|---|---|---|---|---|---|---|---|
| SOC | 5 | 3 | 3 | 3 | 5 | 6 | 3 | 3 | 5 | 5 | 5 | 3 | 8 | 1 | 3 | 2 | 7 | 2 | 1  | 1 | 1 | 1 | 1 | 2 | 6 | 5 | 2 | 5 | 2 |   |   |
| SOC | 2 | 3 | 5 | 5 | 3 | 3 | 5 | 3 | 6 | 5 | 5 | 4 | 6 | 1 | 5 | 5 | 5 | 1 | 1  | 1 | 1 | 1 | 2 | 1 | 1 | 5 | 5 | 2 | 5 | 2 |   |
| SOC | 4 | 5 | 5 | 6 | 4 | 5 | 6 | 4 | 5 | 6 | 2 | 3 | 7 | 1 | 2 | 4 | 6 | 1 | 1  | 1 | 1 | 1 | 1 | 2 | 1 | 5 | 4 | 3 | 4 | 3 |   |
| SOC | 5 | 6 | 3 | 5 | 5 | 5 | 3 | 5 | 7 | 7 | 5 | 5 | 7 | 2 | 2 | 5 | 5 | 1 | 1  | 1 | 1 | 1 | 1 | 2 | 1 | 5 | 4 | 5 | 4 | 5 |   |
| SOC | 6 | 6 | 4 | 6 | 5 | 5 | 6 | 5 | 7 | 7 | 5 | 3 | 5 | 1 | 1 | 1 | 7 | 1 | 2  | 1 | 1 | 1 | 1 | 1 | 1 | 5 | 3 | 4 | 3 | 4 |   |
| SOC | 5 | 5 | 2 | 7 | 6 | 6 | 2 | 5 | 6 | 6 | 5 | 2 | 5 | 1 | 4 | 7 | 6 | 1 | 1  | 1 | 1 | 5 | 2 | 2 | 5 | 1 | 5 | 5 | 2 | 5 | 2 |
| SOC | 2 | 3 | 4 | 6 | 2 | 3 | 5 | 6 | 6 | 6 | 3 | 2 | 7 | 1 | 1 | 2 | 7 | 1 | 1  | 1 | 1 | 5 | 3 | 1 | 3 | 1 | 5 | 5 | 1 | 5 | 1 |
| SOC | 5 | 5 | 2 | 5 | 2 | 3 | 3 | 5 | 7 | 7 | 4 | 5 | 5 | 1 | 1 | 7 | 5 | 1 | 2  | 1 | 1 | 1 | 1 | 1 | 1 | 5 | 5 | 3 | 5 | 3 |   |
| SOC | 3 | 5 | 1 | 5 | 2 | 3 | 2 | 5 | 2 | 6 | 6 | 5 | 6 | 1 | 4 | 7 | 5 | 1 | 2  | 1 | 1 | 1 | 2 | 2 | 1 | 5 | 2 | 3 | 2 | 3 |   |
| SOC | 5 | 6 | 2 | 5 | 4 | 5 | 3 | 5 | 7 | 6 | 6 | 3 | 6 | 2 | 3 | 7 | 5 | 1 | 1  | 1 | 1 | 1 | 2 | 1 | 1 | 5 | 3 | 3 | 3 | 3 |   |
| SOC | 5 | 5 | 2 | 5 | 5 | 5 | 3 | 5 | 6 | 7 | 6 | 3 | 7 | 1 | 1 | 3 | 6 | 1 | 1  | 1 | 1 | 5 | 2 | 1 | 3 | 1 | 5 | 4 | 1 | 4 | 1 |
| SOC | 3 | 3 | 5 | 6 | 3 | 3 | 6 | 6 | 6 | 6 | 7 | 2 | 7 | 1 | 1 | 1 | 6 | 1 | 2  | 1 | 1 | 1 | 2 | 1 | 1 | 5 | 7 | 4 | 7 | 4 |   |
| SOC | 2 | 3 | 4 | 6 | 2 | 5 | 2 | 3 | 6 | 6 | 3 | 1 | 8 | 1 | 2 | 5 | 6 | 1 | 1  | 1 | 1 | 5 | 3 | 2 | 2 | 1 | 5 | 5 | 2 | 5 | 2 |
| SPA | 1 | 7 | 1 | 1 | 1 | 1 | 1 | 1 |   |   |   |   | 7 | 1 | 1 | 1 | 7 | 1 | 1  | 1 | 1 | 5 | 2 | 2 | 4 | 1 | 5 | 5 | 2 | 5 | 2 |
| SPA | 3 | 3 | 5 | 6 | 4 | 4 | 4 | 4 |   |   |   |   | 7 | 1 | 5 | 6 | 6 | 1 | 2  | 1 | 1 | 1 |   | 2 | 2 | 2 | 5 | 3 | 4 | 3 | 4 |
| SPA | 2 | 2 | 6 | 7 | 2 | 2 | 6 | 7 |   |   |   |   | 6 | 1 | 2 | 5 | 7 | 1 | 1  | 2 | 1 | 5 | 1 | 1 | 6 | 1 | 5 | 2 | 5 | 2 | 5 |
| SPA | 6 | 7 | 1 | 5 | 6 | 6 | 1 | 3 |   |   |   |   | 8 | 1 | 2 | 5 | 7 | 1 | 1  | 1 | 1 | 5 | 2 | 1 | 3 | 1 | 5 | 3 | 3 | 3 | 3 |
| SPA | 2 | 2 | 6 | 6 | 2 | 2 | 6 | 6 |   |   |   |   | 7 | 1 | 1 | 1 | 7 | 1 | 1  | 1 | 1 | 5 | 1 | 1 | 5 | 1 | 5 | 5 | 3 | 5 | 3 |
| SPA | 4 | 4 | 4 | 4 | 5 | 5 | 3 | 3 |   |   |   |   | 8 | 1 | 5 | 7 | 1 | 1 | 1  | 1 | 1 | 1 |   | 2 | 2 | 1 | 5 | 3 | 3 | 3 | 3 |
| SPA | 5 | 5 | 2 | 2 | 6 | 6 | 2 | 2 | 7 | 7 | 5 | 7 | 6 | 1 | 2 | 2 | 6 | 1 | 2  | 1 | 1 | 3 | 4 | 1 | 5 | 1 | 5 | 3 | 2 | 3 | 2 |
| SPA | 1 | 4 | 7 | 5 | 7 | 7 | 3 | 3 | 7 | 7 | 3 | 3 | 6 | 1 | 4 | 7 | 3 | 1 | 2  | 2 | 1 | 1 |   | 2 | 2 | 2 | 5 | 1 | 5 | 1 | 5 |
| SPA | 3 | 5 | 4 | 4 | 2 | 2 | 2 | 2 | 6 | 6 | 6 | 2 | 6 | 1 | 4 | 6 | 5 | 1 | 3  | 2 | 1 | 3 | 4 | 2 | 3 | 1 | 5 | 3 | 3 | 3 | 3 |
| SPA | 4 | 4 | 1 | 2 | 6 | 6 | 1 | 2 | 7 | 7 | 4 | 4 | 6 | 1 | 1 | 4 | 7 | 1 | 1  | 2 | 1 | 5 | 3 | 2 | 4 | 1 | 5 | 6 | 2 | 6 | 2 |
| SPA | 5 | 4 | 2 | 6 | 3 | 3 | 1 | 5 | 7 | 7 | 7 | 7 | 7 | 1 | 1 | 4 | 6 | 1 | 2  | 3 | 1 | 5 | 6 | 1 | 3 | 2 | 5 | 2 | 4 | 2 | 4 |
| SPA | 4 | 3 | 5 | 6 | 3 | 3 | 6 | 6 | 7 | 7 | 6 | 5 | 6 | 1 | 4 | 6 | 5 | 1 | 1  | 1 | 1 | 1 |   | 2 | 1 | 1 | 5 | 2 | 3 | 2 | 3 |
| SPA | 5 | 5 | 1 | 3 | 4 | 4 | 2 | 4 | 7 | 7 | 5 | 3 | 6 | 1 | 5 | 3 | 4 | 1 | 1  | 2 | 1 | 3 | 2 | 2 | 3 | 2 | 7 | 5 | 3 | 5 | 3 |
| SPA | 3 | 2 | 4 | 3 | 2 | 2 | 4 | 4 | 4 | 5 | 6 | 5 | 5 | 1 | 2 | 1 | 6 | 1 | 1  | 2 | 1 | 3 | 3 | 1 | 5 | 2 | 5 | 3 | 3 | 3 | 3 |
| SPA | 4 | 4 | 3 | 4 | 3 | 3 | 4 | 4 | 7 | 5 | 5 | 4 | 5 | 1 | 2 | 3 | 5 | 1 | 1  | 1 | 1 | 1 |   | 2 | 1 | 1 | 5 | 2 | 2 | 2 | 2 |
| SPA | 2 | 2 | 4 | 6 | 2 | 4 | 6 | 4 | 4 | 4 | 5 | 2 | 5 | 1 | 1 | 5 | 7 | 1 | 1  | 1 | 1 | 5 | 2 | 1 | 3 | 1 | 5 | 3 | 4 | 3 | 4 |
| SPA | 1 | 1 | 2 | 2 | 5 | 6 | 6 | 5 | 7 | 7 | 6 | 7 | 3 | 1 | 2 | 4 | 4 | 1 | DK | 1 | 1 | 1 |   | 2 | 1 | 2 | 6 | 3 | 2 | 3 | 2 |
| SPA | 1 | 5 | 4 | 5 | 5 | 4 | 3 | 4 | 7 | 7 | 6 | 3 | 6 | 1 | 4 | 3 | 5 | 1 | 1  | 1 | 1 | 1 |   | 2 | 1 | 1 | 5 | 1 | 8 | 1 | 8 |
| SPA | 6 | 7 | 1 | 2 | 6 | 6 | 2 | 2 | 6 | 7 | 6 | 5 | 7 | 1 | 3 | 2 | 7 | 1 | 1  | 1 | 1 | 5 | 2 | 1 | 4 | 2 | 5 | 4 | 2 | 4 | 2 |

|     |   |   |   |   |   |   |   |   |   |   |   |   |   |   |   |   |   |   |    |   |    |   |    |    |   |   |   |   |    |    |   |   |   |
|-----|---|---|---|---|---|---|---|---|---|---|---|---|---|---|---|---|---|---|----|---|----|---|----|----|---|---|---|---|----|----|---|---|---|
| SPA | 2 | 5 | 5 | 5 | 4 | 4 | 2 | 5 | 7 | 7 | 7 | 4 | 6 | 1 | 1 | 1 | 7 | 1 | 2  | 1 | 1  | 1 | 2  | 1  | 5 | 3 | 3 | 3 | 3  |    |   |   |   |
| SPA | 3 | 4 | 2 | 2 | 3 | 5 | 3 | 4 | 6 | 6 | 6 | 3 | 7 | 1 | 3 | 4 | 6 | 1 | 1  | 1 | 1  | 1 | 1  | 1  | 2 | 2 | 2 | 2 | 2  |    |   |   |   |
| SPA | 2 | 4 | 1 | 6 | 1 | 6 | 1 | 6 | 6 | 6 | 2 | 5 | 5 | 1 | 5 | 6 | 3 | 1 | 2  | 2 | 1  | 1 | 2  | 2  | 6 | 2 | 3 | 2 | 3  |    |   |   |   |
| STA | 5 | 5 | 5 | 3 | 5 | 5 | 5 | 3 | 7 | 7 | 2 | 2 | 3 | 1 | 1 | 4 | 5 | 1 | 1  | 1 | 1  | 1 | 1  | 1  | 2 | 1 | 3 | 4 | 3  | 4  |   |   |   |
| STA | 6 | 5 | 5 | 4 | 5 | 5 | 5 | 5 | 4 | 6 | 1 | 2 | 3 | 1 | 1 | 1 | 6 | 1 | 1  | 2 | 1  | 1 | 1  | 1  | 2 | 8 | 1 | 8 | 1  |    |   |   |   |
| STA | 3 | 3 | 6 | 5 | 5 | 4 | 3 | 3 | 6 | 6 | 2 | 3 | 4 | 3 | 4 | 5 | 5 | 1 | 2  | 1 | 1  | 1 | 1  | 1  | 7 | 1 | 2 | 1 | 2  |    |   |   |   |
| STA | 4 | 4 | 4 | 4 | 3 | 4 | 2 | 7 | 6 | 6 | 2 | 1 | 2 | 1 | 1 | 1 | 7 | 1 | 1  | 1 | 1  | 1 | 1  | 1  | 2 | 4 | 2 | 4 | 2  |    |   |   |   |
| STA | 2 | 5 | 4 | 5 | 4 | 4 | 3 | 5 | 6 | 5 | 2 | 2 | 6 | 1 | 2 | 5 | 6 | 1 | 1  | 1 | 1  | 5 | 2  | 2  | 4 | 1 | 5 | 5 | 7  | 5  | 7 |   |   |
| STA | 6 | 3 | 1 | 5 | 6 | 5 | 7 | 5 | 7 | 7 | 1 | 1 | 5 | 1 | 1 | 6 | 7 | 1 | 1  | 1 | 1  | 5 | 1  | 1  | 2 | 1 | 2 | 3 | 2  | 3  | 2 |   |   |
| STA | 3 | 2 | 2 | 6 | 5 | 2 | 1 | 6 | 7 | 6 | 3 | 4 | 5 | 3 | 3 | 6 | 5 | 1 | 1  | 1 | 1  | 6 | EM | 1  | 6 | 5 | 1 | 1 | EM | EM |   |   |   |
| STA | 2 | 1 | 6 | 4 | 6 | 4 | 5 | 5 | 6 | 7 | 3 | 2 | 5 | 1 | 1 | 1 | 7 | 1 | 1  | 1 | 1  | 1 | 1  | 1  | 1 | 5 | 1 | 2 | 1  | 2  |   |   |   |
| STA | 4 | 6 | 6 | 5 | 6 | 7 | 5 | 4 | 5 | 7 | 2 | 2 | 4 | 1 | 5 | 5 | 4 | 1 | 1  | 1 | 1  | 1 | 1  | 1  | 2 | 1 | 1 | 5 | 3  | 4  | 3 | 4 |   |
| STA | 6 | 5 | 2 | 3 |   |   |   |   |   |   | 6 | 5 | 2 | 2 | 6 | 1 | 1 | 1 | 7  | 1 | 2  | 1 | 3  | DK | 1 | 5 | 1 | 5 | 3  | 3  | 3 | 3 |   |
| STA | 6 | 7 | 1 | 2 | 6 | 5 | 1 | 3 | 7 | 7 | 2 | 2 | 4 | 1 | 1 | 5 | 5 | 1 | DK | 2 | 5  | 1 | DK | 2  | 5 | 1 | 4 | 1 | 5  | 4  | 2 | 4 | 2 |
| STA | 2 | 2 | 6 | 5 | 2 | 2 | 6 | 5 | 7 | 5 | 5 | 4 | 3 | 2 | 3 | 4 | 6 | 1 | 1  | 1 | 1  | 1 | 1  | 1  | 2 | 1 | 1 | 5 | 4  | 1  | 4 | 1 |   |
| STA | 3 | 3 | 5 | 5 | 2 | 2 | 4 | 4 | 6 | 6 | 2 | 2 | 7 | 1 | 2 | 4 | 5 | 1 | 1  | 1 | 1  | 1 | 1  | 1  | 2 | 1 | 1 | 5 | 8  | 1  | 8 | 1 |   |
| STA | 7 | 5 | 2 | 4 | 5 | 5 | 2 | 6 | 5 | 6 | 1 | 2 | 4 | 1 | 2 | 2 | 6 | 1 | 1  | 1 | 1  | 1 | 1  | 1  | 1 | 4 | 1 | 5 | 1  | 2  | 1 | 2 |   |
| STA | 3 | 3 | 6 | 6 | 5 | 4 | 3 | 5 | 7 | 7 | 1 | 1 | 5 | 1 | 3 | 7 | 5 | 1 | 1  | 1 | 1  | 1 | 1  | 1  | 2 | 1 | 1 | 5 | 4  | 1  | 4 | 1 |   |
| STA | 4 | 2 | 3 | 5 | 4 | 4 | 4 | 4 | 4 | 5 | 3 | 3 | 4 | 2 | 4 | 2 | 6 | 1 | 2  | 1 | 1  | 3 | 4  | 4  | 1 | 2 | 1 | 5 | 3  | 4  | 3 | 4 |   |
| STA | 4 | 5 | 4 | 3 | 5 | 4 | 4 | 4 | 5 | 5 | 4 | 4 | 4 | 4 | 4 | 4 | 5 | 1 | 1  | 1 | 1  | 3 | 3  | 2  | 2 | 2 | 1 | 5 | 4  | 3  | 4 | 3 |   |
| STA | 3 | 2 | 5 | 5 | 6 | 5 | 3 | 2 | 7 | 7 | 2 | 1 | 5 | 1 | 4 | 4 | 2 | 1 | 2  | 1 | 1  | 3 | DK | 2  | 3 | 1 | 5 | 4 | 4  | 4  | 4 | 4 |   |
| STA | 2 | 2 | 5 | 5 | 3 | 3 | 6 | 5 | 7 | 6 | 4 | 2 | 6 | 1 | 2 | 6 | 2 | 1 | 2  | 1 | 1  | 1 | 1  | 1  | 2 | 1 | 1 | 5 | 3  | 2  | 3 | 2 |   |
| STA | 5 | 5 | 3 | 5 | 5 | 5 | 2 | 3 | 7 | 7 | 3 | 3 | 5 | 1 | 3 | 5 | 6 | 1 | 1  | 2 | 5  | 5 | 1  | 1  | 2 | 1 | 5 | 5 | 2  | 5  | 2 |   |   |
| STA | 5 | 6 | 2 | 2 | 5 | 6 | 2 | 2 | 6 | 5 | 2 | 2 | 4 | 1 | 4 | 4 | 6 | 1 | 2  | 4 | PU | 1 | 1  | 1  | 2 | 1 | 5 | 1 | 3  | 1  | 3 |   |   |
| STA | 3 | 4 | 4 | 6 | 4 | 3 | 4 | 5 | 5 | 7 | 3 | 3 | 4 | 5 | 3 | 5 | 4 | 1 | 2  | 2 | 1  | 1 | 1  | 1  | 2 | 2 | 1 | 5 | 2  | 1  | 2 | 1 |   |
| STA | 7 | 7 | 1 | 2 | 7 | 7 | 1 | 1 | 7 | 7 | 5 | 3 | 4 | 1 | 4 | 7 | 1 | 1 | 2  | 1 | 5  | 2 | 2  | 1  | 4 | 1 | 5 | 5 | 1  | 5  | 1 |   |   |
| STA | 2 | 2 | 6 | 6 | 2 | 4 | 5 | 5 | 4 | 6 | 2 | 2 | 4 | 2 | 5 | 5 | 5 | 1 | 1  | 2 | 1  | 1 | 1  | 1  | 1 | 2 | 6 | 1 | 6  | 1  |   |   |   |
| STA | 5 | 5 | 2 | 2 | 5 | 5 | 2 | 2 | 6 | 6 | 1 | 1 | 3 | 2 | 3 | 3 | 4 | 1 | 2  | 2 | 1  | 1 | 1  | 1  | 2 | 4 | 3 | 4 | 3  | 4  | 3 |   |   |
| STA | 3 | 4 | 3 | 3 | 5 | 5 | 2 | 2 | 6 | 5 | 3 | 3 | 4 | 1 | 2 | 5 | 4 | 1 | 1  | 1 | 5  | 2 | 2  | 1  | 5 | 1 | 5 | 6 | 1  | 6  | 1 |   |   |
| STA | 6 | 4 | 4 | 6 | 5 | 5 | 3 | 4 | 6 | 6 | 3 | 1 | 6 | 1 | 3 | 5 | 5 |   | 1  | 2 | 1  | 1 | 1  | 1  | 2 | 1 | 5 | 4 | 2  | 4  | 2 |   |   |
| STA | 3 | 2 | 5 | 5 | 2 | 2 | 6 | 6 | 5 | 5 | 2 | 2 | 4 | 4 | 4 | 6 | 3 | 1 | 1  | 2 | 1  | 1 | 1  | 1  | 2 | 3 | 4 | 3 | 4  | 3  | 4 |   |   |

*Notes. Questions.* (NB: question numbering does not indicate the order in which questions were presented; please refer to materials and methods for information on ordering.) Q1-Q4 – These items ask about your own beliefs regarding X. Please rate your agreement with the following: Q1: Personally, I think that being a top scholar of X requires a special aptitude that just can't be taught; Q2: Personally, I think that if you want to succeed in X, hard work alone just won't cut it; you need to have an innate gift or talent; Q3: Personally, I think that with the right amount of effort and dedication, anyone can be a top scholar of X; Q4: Personally, I think that when it comes to X, the most important factors for success are motivation and sustained effort; raw ability is secondary; Q5-Q8 – These items ask about beliefs generally held by other academics in the field of X. Please rate your agreement with the following: Q5: Other academics in X tend to think that being a top scholar of X requires a special aptitude that just can't be taught; Q6: Other academics in X tend to think that if you want to succeed in X, hard work alone just won't cut it; you need to have an innate gift or talent; Q7: Other academics in X tend to think that with the right amount of effort and dedication, anyone can be a top scholar of X; Q8: Other academics in X tend to think that when it comes to X, the most important factors for success are motivation and sustained effort; raw ability is secondary (Q1-Q8: 1=Strongly Disagree to 7=Strongly Agree); Q9-Q12 -- Please rate the extent to which the following processes are involved in doing scholarly work in X: Q9: Identifying the abstract principles, structures, or rules that underlie the relevant subject matter; Q10: Analyzing the relevant subject matter and constructing a systematic understanding of it; Q11: Having a refined understanding of human thoughts and feelings; Q12: Recognizing and responding appropriately to people's mental states (Q9-Q12: 1=Never Involved to 7=Highly Involved); Q13: Please provide your best guess or estimate for this question: In the recent past, what percentage of X doctoral (Ph.D.) degrees from American universities do you think have been earned by women? (1=0-9%, 2=10-19%, 3=20-29%, 4=30-39%, 5=40-49%, 6=50-59%, 7=60-69%, 8=70-79%, 9=80-89%, 10=90-100%); Q14: These items ask about your own beliefs regarding X. Please rate your agreement with the following: Personally, I think that even though it's not politically correct to say it, men are often more suited than women to do high-level work in X; Q15: This item asks about beliefs generally held by other academics in the field of X. Please rate your agreement with the following: Other academics in X tend to think that even though it's not politically correct to say it, men are often more suited than women to do high-level work in X; Q16: These items ask about your own beliefs regarding X. Please rate your agreement with the following: Personally, I think that women face more challenges than men if they pursue careers in X; Q17: These items ask about your own beliefs regarding X. Please rate your agreement with the following: Personally, I think that X as a discipline is welcoming to women (Q14-Q17: 1=Strongly Disagree to 7=Strongly Agree); Q18: Does your institution have a Ph.D. program in X? (1=Y, 2=N); Q19: Approximately how does your department compare to other departments in your field in terms of overall reputation? (Please consider only institutions in the United States.) (1=Top 10%, 2=Top 25%, 3=Top 50%, 4=Lower 50%, 5=don't know (5s are replaced by text "DK")); Q20: How would you categorize your institution? 1=public university, 2=private research university, 3=liberal arts college, 4=other (please specify); Q21: How would you categorize your institution? (TEXT if selection to prior forced-choice item was "Other"); Q22: What is your position? (1=graduate student, 2=post-doctoral fellow/researcher, 3=untentured faculty, non-tenure track, 4=untentured faculty, tenure track, 5=tenured faculty, 6=other (please specify)); Q23: What is your position? (TEXT if selection to prior forced-choice item was "Other"); Q24: If your institution does have a Ph.D. program in your discipline, please provide your best guess or estimate for this question: Roughly what percentage of applicants are accepted into your department's Ph.D. program in a typical year? (if not, please select "no Ph.D. program") (Question was displayed only for individuals reporting themselves as untentured faculty, non-tenure track; untentured faculty, tenure track; or tenured faculty. 1=0-9%, 2=10-19%, 3=20-29%, 4=30-39%, 5=40-49%, 6=50-59%, 7=60-69%, 8=70-79%, 9=80-89%, 10=90-100%, 11=don't know, 12=No Ph.D. program (responses of 11 and 12 replaced by text)); Q25: Are you: 1=male, 2=female; Q26: What is your age? 1=<30, 2=30-39, 3=40-49, 4=50-59, 5=60-69, 6=70 or >; Q27: What is your ethnicity? (1= Not Hispanic or Latino, 2=Hispanic or Latino); Q28: What is your race? 1=American Indian or Alaska Native, 2=Asian, 3=Black or African American, 4=Native Hawaiian or Other Pacific Islander, 5=White, 6=Multi-Racial, 7=Other; Q29: Approximately how many hours a week do you spend working In your office, lab, classroom, or otherwise on campus? (1=<10, 2=10-19, 3=20-29, 4=30-39, 5=40-49, 6=50-59, 7=60-69, 8=>70); Q30: Approximately how many hours a week do you spend working off campus (e.g., home, coffee shop, other remote site?) (1=<10, 2=10-19, 3=20-29, 4=30-39, 5=40-49, 6=50-59, 7=60-69, 8=>70); R29: [for calculation purposes only] responses to Q29 with responses from emeritus faculty replaced by "EM"; R30: [for calculation purposes only] responses to Q30 with responses from emeritus faculty replaced by "EM".

Discipline abbreviations. ANT: Anthropology; ARC: Archaeology; AHI: Art History; AST: Astrophysics; BCH: Biochemistry; CHE: Chemistry; CLA: Classics; COM: Communication Studies; CLI: Comparative Literature; CSC: Computer Science; EAR: Earth Sciences; ECO: Economics; EDU: Education; ENG: Engineering; ELI: English Literature; EVO: Evolutionary Biology; HIS: History; LIN: Linguistics; MAT: Mathematics; MES: Middle Eastern Studies; MOL: Molecular Biology; MTC: Music Theory and Composition; NEU: Neuroscience; PHI: Philosophy; PHY: Physics; POL: Political Science; PSY: Psychology; SOC: Sociology; SPA: Spanish; STA: Statistics.

Text field abbreviations/coding. AD=Adjunct; CH=Chair; CP=chaired professor; DE=Dean; DK=don't know; DO=PhD dropout; EM= emeritus; HE=Head of research institute; IN=Industry; PU=Private university; R1=Public research university (R1); RC=Regional Comprehensive University; RF=Research Fellow; RG=Recent Graduate; RP=Research Professor; SR=State Related; SS=State Survey.

## References

1. M. Bennett, Men's and women's self-estimates of intelligence. *J. Soc. Psychol.* **136**, 411–412 (1996). [Medline](#)
2. B. Kirkcaldy, P. Noack, A. Furnham, G. Siefen, Parental estimates of their own and their children's intelligence. *Eur. Psychol.* **12**, 173–180 (2007).
3. A. Lecklider, *Inventing the Egghead* (Univ. of Pennsylvania Press, Philadelphia, 2013).
4. J. Tiedemann, Gender-related beliefs of teachers in elementary school mathematics. *Educ. Stud. Math.* **41**, 191–207 (2000).
5. S. J. Ceci, W. M. Williams, *Why Aren't More Women in Science?* (APA, Washington, DC, 2007).
6. S. J. Ceci, W. M. Williams, Understanding current causes of women's underrepresentation in science. *Proc. Natl. Acad. Sci. U.S.A.* **108**, 3157–3162 (2011). [Medline](#)
7. National Science Foundation, Survey of Earned Doctorates, (2011); [www.nsf.gov/statistics/srvydoctorates/](http://www.nsf.gov/statistics/srvydoctorates/).
8. S. J. Ceci, D. K. Ginther, S. Kahn, W. M. Williams, Women in academic science: A changing landscape. *Psychol. Sci. Public Interest* **15**, 75(2014).
9. C. S. Dweck, *Mindset: The New Psychology of Success* (Random House, New York, 2006).
10. V. Valian, *Why So Slow? The Advancement of Women* (MIT Press, Cambridge, MA, 1998).
11. I. Dar-Nimrod, S. J. Heine, Exposure to scientific theories affects women's math performance. *Science* **314**, 435 (2006). [Medline](#)
12. A. Wigfield, J. S. Eccles, Expectancy-value theory of achievement motivation. *Contemp. Educ. Psychol.* **25**, 68–81 (2000). [Medline](#)
13. K. Ferriman, D. Lubinski, C. P. Benbow, Work preferences, life values, and personal views of top math/science graduate students and the profoundly gifted: Developmental changes and gender differences during emerging adulthood and parenthood. *J. Pers. Soc. Psychol.* **97**, 517–532 (2009). [Medline](#)
14. D. C. Geary, *Male, Female: The Evolution of Human Sex Differences* (APA Books, Washington, DC, ed. 2, 2010).
15. L. V. Hedges, A. Nowell, Sex differences in mental test scores, variability, and numbers of high-scoring individuals. *Science* **269**, 41–45 (1995). [Medline](#)
16. J. S. Hyde, The gender similarities hypothesis. *Am. Psychol.* **60**, 581–592 (2005). [Medline](#)
17. A. M. Penner, Gender differences in extreme mathematical achievement: An international perspective on biological and social factors. *Am. J. Sociol.* **114** (suppl.), S138–S170 (2008). [Medline](#)
18. J. Billington, S. Baron-Cohen, S. Wheelwright, Cognitive style predicts entry into physical sciences and humanities: Questionnaire and performance tests of empathy and systemizing. *Learn. Individ. Differ.* **17**, 260–268 (2007).

19. R. Lippa, Gender-related individual differences and the structure of vocational interests: The importance of the people-things dimension. *J. Pers. Soc. Psychol.* **74**, 996–1009 (1998). [Medline](#)
20. Educational Testing Service, *GRE: Guide to the Use of Scores* (ETS, Princeton, NJ, 2012).
21. J. Bethlehem, Selection bias in web surveys. *Int. Stat. Rev.* **78**, 161–188 (2010).
22. R. J. A. Little, Post-stratification: A modeler's perspective. *J. Am. Stat. Assoc.* **88**, 1001–1012 (1993).
23. A. F. Hayes, *Introduction to Mediation, Moderation, and Conditional Process Analysis* (Guilford Press, New York, 2013).
24. C. M. Steele, J. Aronson, Stereotype threat and the intellectual test performance of African Americans. *J. Pers. Soc. Psychol.* **69**, 797–811 (1995). [Medline](#)
25. M. Shih, T. L. Pittinsky, N. Ambady, Stereotype susceptibility: Identity salience and shifts in quantitative performance. *Psychol. Sci.* **10**, 80–83 (1999).
26. J. D. Angrist, J. S. Pischke, *Mostly Harmless Econometrics: An Empiricist's Companion* (Princeton Univ. Press, Princeton, NJ, 2008).
27. S. J. Gould, *The Mismeasure of Man* (Norton, New York, 1996).
